# Supplementary material for: Molecular subtyping of endometrial carcinoma cell lines uncovers subtype-specific targetable vulnerabilities
Source: Research Square preprint supplement (doi:10.21203/rs.3.rs-6536216/v1), 2025-05-10
Supplement: Supplementary file 1 [file 1b9ebd5e6104649f02fb79ca.xlsx]

## Sheet: Sheet1
Table S5. List of ARID1A and ARID1B mutations in all CCLE cell lines.
Sample ID	ARID1A	ARID1B
EN	D1850Gfs*4 (driver), K1094Sfs*67 (driver)	G660Efs*8 (driver), V2005Gfs*7 (driver), M1432I, G1594W
AN3CA	D1850Tfs*33 (driver), E2054_L2061del	Q1462* (driver), A1710Hfs*56 (driver), E693G, M593V
SKUT1	G276Efs*87 (driver), P1326Rfs*155 (driver)	Q1859* (driver), Q2034* (driver)
MFE296	G276Efs*87 (driver), Q185* (driver)	Q1617* (driver), K1174Sfs*37 (driver)
EFO-27	R1722* (driver), G285Efs*78 (driver)	P735Hfs*10 (driver), I1658* (driver)
SNU1	D1850Gfs*4 (driver), Q1519Rfs*8 (driver), Q372Sfs*19 (driver), P121S	R1069Sfs*60 (driver), F2111I
JHUEM2	D1850Gfs*4 (driver), Y1101Cfs*3 (driver)	Q1810* (driver)
SNGM	D1850Tfs*33 (driver), F2141Sfs*59 (driver)	A415Pfs*15 (driver)
HEC6	D1850Tfs*33 (driver), Q372Afs*28 (driver)	G1284Efs*2 (driver), Q2176R, D281Y
MESSA	G1610Wfs*38 (driver), T1690Nfs*8 (driver)	G1111R, HOMDEL (driver)
HEC151	G276Efs*87 (driver)	V2005Wfs*16 (driver)
LNCAPCLONEFGC	G285Efs*78 (driver)	E2164* (driver)
OVISE	H203Qfs*197 (driver), Q542Pfs*80 (driver), Q542Rfs*77 (driver), Q543Sfs*76 (driver)	Y840* (driver)
SNU324	K1905Nfs*18 (driver)	A724V, HOMDEL (driver)
SNU1040	M1564* (driver), R774C, S402L, P887T	E1564* (driver), W1637* (driver), P933L, E1922K, S2155N
RL952	M651Wfs*7 (driver), R693* (driver)	G734Afs*11 (driver), A1092V, D2065G
JHUEM1	N2109Qfs*41 (driver), Q199Sfs*33 (driver), R774C	Q833* (driver)
OCUM1	Q1131Sfs*30 (driver)	T937Rfs*9 (driver)
CW2	Q1402* (driver)	S736Ifs*27 (driver), Y365D
A2780	Q1430* (driver), R1721Hfs*4 (driver)	A946Vfs*10 (driver), HOMDEL (driver)
JURKAT	Q1519Rfs*8 (driver), R1833C	Q1227* (driver)
CAL51	R1276* (driver), D1850Tfs*33 (driver)	D1825* (driver)
HEC108	R1446* (driver), K1072Nfs*21 (driver), Y212H, P1307S, G2193D	N1130Tfs*12 (driver), A952V, A994V, P1001S, R1534H
HEC251	S2272* (driver), V2111I	Y2118* (driver)
TOV21G	Y551Lfs*72 (driver), Q758Rfs*75 (driver)	K1977Efs*20 (driver)
SUDHL5	G285* (driver), Q177H	HOMDEL (driver)
NCIH1869	D1850Gfs*4 (driver)	HOMDEL (driver)
TYKNU	G91Rfs*16 (driver)	HOMDEL (driver)
NCIH2286	G927* (driver), G927* (driver)	HOMDEL (driver)
RMUGS	HOMDEL (driver)	HOMDEL (driver)
CORL105	HOMDEL (driver)	HOMDEL (driver)
GOS3	HOMDEL (driver)	HOMDEL (driver)
CFPAC1	HOMDEL (driver)	HOMDEL (driver)
NIHOVCAR3	HOMDEL (driver)	HOMDEL (driver)
SNU5	HOMDEL (driver)	HOMDEL (driver)
A704	HOMDEL (driver)	HOMDEL (driver)
KMRC3	HOMDEL (driver)	HOMDEL (driver)
ZR751	HOMDEL (driver)	HOMDEL (driver)
NCIH1385	HOMDEL (driver)	HOMDEL (driver)
BT483	HOMDEL (driver)	HOMDEL (driver)
SKLU1	N1253Tfs*16 (driver)	HOMDEL (driver)
UACC812	A163V, ARID1A-WDTC1, HOMDEL (driver)	no alteration
SCC15	A1885V	no alteration
SNU81	A2065T	no alteration
SF539	A247V	no alteration
SF126	A259P	no alteration
MOLT4	A873V, R1053H, S2002F	no alteration
BECKER	AMP	no alteration
COLO668	AMP	no alteration
MDAMB468	ARID1A-MAST2	no alteration
DB	ARID1A-MAU2	no alteration
SKES1	ARID1A-NUDC	no alteration
OVSAHO	ARID1A-RP1-153P14.8	no alteration
MKN45	ARID1A-RPS6KA1	HOMDEL (driver)
NCIH1793	C884* (driver)	no alteration
JHUEM3	D1025Wfs*15 (driver)	no alteration
SKMEL1	D1794E	HOMDEL (driver)
NUGC3	D1850Gfs*4 (driver)	no alteration
IM95	D1850Gfs*4 (driver)	no alteration
IGROV1	D1850Gfs*4 (driver), G276Efs*87 (driver)	no alteration
KM12	D1850Gfs*4 (driver), Q561H	no alteration
SNU349	D1850Tfs*33 (driver)	A1935V
DV90	D1850Tfs*33 (driver)	no alteration
SNU520	D1850Tfs*33 (driver), D1850Gfs*4 (driver), P252H	no alteration
LS180	D1850Tfs*33 (driver), K1094Sfs*67 (driver)	no alteration
RKO	D1850Tfs*33 (driver), P1115Qfs*46 (driver)	no alteration
NCIH810	D1957E	no alteration
PF382	D2072H	no alteration
OV56	D2178Gfs*47 (driver)	no alteration
MDAMB361	E1297* (driver), V1058G	no alteration
EOL1	E2078K	no alteration
SNU449	E2250Rfs*28 (driver)	no alteration
NCIH2110	E966K, G1178A	Q832H
PECAPJ49	F1457S, A54S	no alteration
KP3	F2141Lfs*9 (driver)	no alteration
LOVO	F2141Sfs*59 (driver)	P1424L
ISHIKAWAHERAKLIO02ER	F2141Sfs*59 (driver), A339Lfs*24 (driver)	M814T
COV434	G1255E	no alteration
DMS454	G175R	no alteration
SUPT11	G272V	HOMDEL (driver)
NAMALWA	G276* (driver)	no alteration
OVK18	G276Efs*87 (driver), Y592Ifs*27 (driver)	no alteration
HS746T	G444S	no alteration
SNU423	G623* (driver)	no alteration
SW948	G701A	no alteration
NCIH1048	G85Rfs*25 (driver)	no alteration
NCIH196	H203D	no alteration
WM793	H688P	no alteration
NB1	HOMDEL (driver)	E1402del
NCIH2405	HOMDEL (driver)	L419F
NCIH28	HOMDEL (driver)	no alteration
NH6	HOMDEL (driver)	no alteration
KPNRTBM1	HOMDEL (driver)	no alteration
TUHR14TKB	HOMDEL (driver)	no alteration
VMRCLCP	HOMDEL (driver)	no alteration
GSS	HOMDEL (driver)	no alteration
KNS81	HOMDEL (driver)	no alteration
HSC4	HOMDEL (driver)	no alteration
HPAFII	HOMDEL (driver)	no alteration
PANC0213	HOMDEL (driver)	no alteration
NCIN87	HOMDEL (driver)	no alteration
CORL24	HOMDEL (driver)	no alteration
SW1573	HOMDEL (driver)	no alteration
SKCO1	HOMDEL (driver)	no alteration
NCIH292	HOMDEL (driver)	no alteration
SNU626	HOMDEL (driver)	no alteration
IMR32	HOMDEL (driver)	no alteration
KPNYN	HOMDEL (driver)	no alteration
SKNBE2	HOMDEL (driver)	no alteration
NCIH1648	HOMDEL (driver)	no alteration
NCIH209	HOMDEL (driver)	no alteration
VMRCRCZ	HOMDEL (driver)	no alteration
A172	HOMDEL (driver)	no alteration
HUH1	HOMDEL (driver)	no alteration
EFM19	HOMDEL (driver)	no alteration
QGP1	HOMDEL (driver)	no alteration
CHP212	HOMDEL (driver)	no alteration
RT4	HOMDEL (driver)	no alteration
KATOIII	HOMDEL (driver)	no alteration
DOV13	HOMDEL (driver)	no alteration
KMRC2	HOMDEL (driver)	no alteration
SLR24	HOMDEL (driver)	no alteration
SLR26	HOMDEL (driver)	no alteration
GRANTA519	HOMDEL (driver)	no alteration
TT	HOMDEL (driver)	no alteration
CL14	HOMDEL (driver)	no alteration
SUPHD1	HOMDEL (driver)	no alteration
MOTN1	HOMDEL (driver)	no alteration
CHP126	HOMDEL (driver)	no alteration
HCC1419	HOMDEL (driver)	no alteration
TE441T	HOMDEL (driver)	no alteration
ZR7530	HOMDEL (driver)	no alteration
SIMA	HOMDEL (driver)	no alteration
TT2609C02	HOMDEL (driver)	no alteration
CAL120	HOMDEL (driver)	no alteration
HCC2218	HOMDEL (driver)	S180R
JURLMK1	HOMDEL (driver)	Y1148C
NCIH460	I2135_L2136del	no alteration
GP2D	K1072Nfs*21 (driver), H1854Y, A333T	A481V
SNU175	K1862R	T690M, A893V, A1487V, R2221L
SNU1079	L2029Qfs*13 (driver)	no alteration
BICR56	L2216F	no alteration
OCILY19	L818Cfs*15 (driver)	no alteration
SW48	M1564* (driver), P1326L	no alteration
HPAC	M1634Hfs*14 (driver)	no alteration
KYSE450	M1673Sfs*9 (driver)	no alteration
HUH28	M759V, S178I	S51C
RERFLCAD2	M863I	no alteration
SNU761	N1183S	no alteration
HCC1569	N2130S	no alteration
PK59	N957S	no alteration
NCIH322	no alteration	A1009S
AGS	no alteration	A1963D
LC1F	no alteration	A460V
M059K	no alteration	AMP
SNU475	no alteration	AMP
NCIH1105	no alteration	AMP
NCIH146	no alteration	AMP
EM2	no alteration	AMP
F36P	no alteration	AMP
NCIH1666	no alteration	ARID1B-AL590867.1
CORL95	no alteration	ARID1B-SNX9
SUDHL8	no alteration	ARID1B-TMEM242, AMP
DMS79	no alteration	ARID1B-TPRG1, AMP
KASUMI1	no alteration	ARID1B-WDR27
NCIH1876	no alteration	D1939A, AMP
PECAPJ34CLONEC12	no alteration	E1293G
COV362	no alteration	G1221C
NCIH1792	no alteration	G2051V
TE15	no alteration	G289V
HT	no alteration	G515A, Y1335C
HCC1395	no alteration	G827A, ARID1B-WTAP, AMP
NCIH2291	no alteration	G841S
MDAMB436	no alteration	G871Vfs*41 (driver), P870Gfs*43 (driver), G871_P872delinsA
NCIH747	no alteration	H723N
JHOS4	no alteration	HOMDEL (driver)
LN229	no alteration	HOMDEL (driver)
OUMS27	no alteration	HOMDEL (driver)
MSTO211H	no alteration	HOMDEL (driver)
SH4	no alteration	HOMDEL (driver)
KPL1	no alteration	HOMDEL (driver)
SNU1272	no alteration	HOMDEL (driver)
ECGI10	no alteration	HOMDEL (driver)
SNU1033	no alteration	HOMDEL (driver)
GSU	no alteration	HOMDEL (driver)
MDAMB231	no alteration	HOMDEL (driver)
OE33	no alteration	HOMDEL (driver)
JHH5	no alteration	HOMDEL (driver)
PC14	no alteration	HOMDEL (driver)
HUPT3	no alteration	HOMDEL (driver)
CAOV4	no alteration	HOMDEL (driver)
KMS27	no alteration	HOMDEL (driver)
KHM1B	no alteration	HOMDEL (driver)
CAMA1	no alteration	HOMDEL (driver)
BCP1	no alteration	HOMDEL (driver)
NCIH358	no alteration	HOMDEL (driver)
HCC1937	no alteration	HOMDEL (driver)
IALM	no alteration	HOMDEL (driver)
SKNAS	no alteration	HOMDEL (driver)
SNU398	no alteration	HOMDEL (driver)
CORL47	no alteration	HOMDEL (driver)
DKMG	no alteration	HOMDEL (driver)
SNU466	no alteration	HOMDEL (driver)
T3M10	no alteration	HOMDEL (driver)
DMS153	no alteration	HOMDEL (driver)
HS939T	no alteration	HOMDEL (driver)
PANC0813	no alteration	HOMDEL (driver)
ISTMES2	no alteration	HOMDEL (driver)
NCIH1623	no alteration	HOMDEL (driver)
G292CLONEA141B1	no alteration	HOMDEL (driver)
MCF7	no alteration	HOMDEL (driver)
HCC202	no alteration	HOMDEL (driver)
TT	no alteration	HOMDEL (driver)
MDAMB157	no alteration	HOMDEL (driver)
CAPAN2	no alteration	HOMDEL (driver)
MM1S	no alteration	HOMDEL (driver)
KP2	no alteration	HOMDEL (driver)
ESS1	no alteration	HOMDEL (driver)
BT474	no alteration	HOMDEL (driver)
OVKATE	no alteration	HOMDEL (driver)
NCIH1395	no alteration	HOMDEL (driver)
NCIH2196	no alteration	HOMDEL (driver)
HCC364	no alteration	HOMDEL (driver)
JEKO1	no alteration	HOMDEL (driver)
SKMM2	no alteration	HOMDEL (driver)
COLO678	no alteration	HOMDEL (driver)
HS852T	no alteration	HOMDEL (driver)
REC1	no alteration	HOMDEL (driver)
MEC1	no alteration	HOMDEL (driver)
CL11	no alteration	HOMDEL (driver)
SKNO1	no alteration	HOMDEL (driver)
NCIH510	no alteration	M1464I
OCIAML5	no alteration	M479L, M479I
JHH7	no alteration	M935V, P426L, AMP
NCIH2347	no alteration	N1961S, HOMDEL (driver)
KLE	no alteration	N852* (driver)
DMS53	no alteration	no alteration
P3HR1	no alteration	no alteration
HUT78	no alteration	no alteration
UMUC3	no alteration	no alteration
PATU8988S	no alteration	no alteration
RERFGC1B	no alteration	no alteration
NCIH2087	no alteration	no alteration
NCIH2085	no alteration	no alteration
SNUC2A	no alteration	no alteration
NCIH1573	no alteration	no alteration
ISTMES1	no alteration	no alteration
EBC1	no alteration	no alteration
HEL	no alteration	no alteration
JHOC5	no alteration	no alteration
ACCMESO1	no alteration	no alteration
SHSY5Y	no alteration	no alteration
YD15	no alteration	no alteration
YD10B	no alteration	no alteration
TUHR10TKB	no alteration	no alteration
SNUC4	no alteration	no alteration
OV90	no alteration	no alteration
CCK81	no alteration	no alteration
RERFLCAI	no alteration	no alteration
FU97	no alteration	no alteration
HCC15	no alteration	no alteration
KYSE410	no alteration	no alteration
RERFLCMS	no alteration	no alteration
KYSE140	no alteration	no alteration
GCIY	no alteration	no alteration
KMRC20	no alteration	no alteration
HEL9217	no alteration	no alteration
CAL12T	no alteration	no alteration
SKNSH	no alteration	no alteration
HSC3	no alteration	no alteration
VMRCRCW	no alteration	no alteration
HGC27	no alteration	no alteration
LUDLU1	no alteration	no alteration
CORL23	no alteration	no alteration
MC116	no alteration	no alteration
A498	no alteration	no alteration
AU565	no alteration	no alteration
NCIH1650	no alteration	no alteration
SW1271	no alteration	no alteration
HCC1143	no alteration	no alteration
KNS42	no alteration	no alteration
KYSE270	no alteration	no alteration
SKNFI	no alteration	no alteration
EPLC272H	no alteration	no alteration
HCC1359	no alteration	no alteration
LS513	no alteration	no alteration
CORL311	no alteration	no alteration
NCIH1339	no alteration	no alteration
WM88	no alteration	no alteration
NCIH1092	no alteration	no alteration
SW837	no alteration	no alteration
OV7	no alteration	no alteration
OAW28	no alteration	no alteration
SKHEP1	no alteration	no alteration
NCIH650	no alteration	no alteration
YAPC	no alteration	no alteration
HCC366	no alteration	no alteration
SNU1076	no alteration	no alteration
KMS20	no alteration	no alteration
HCC1195	no alteration	no alteration
PLCPRF5	no alteration	no alteration
NCIH2023	no alteration	no alteration
PK1	no alteration	no alteration
NCIH23	no alteration	no alteration
TE617T	no alteration	no alteration
NCIH1930	no alteration	no alteration
RERFLCKJ	no alteration	no alteration
NCIH1693	no alteration	no alteration
SW780	no alteration	no alteration
HS683	no alteration	no alteration
HUTU80	no alteration	no alteration
DMS114	no alteration	no alteration
SBC5	no alteration	no alteration
VCAP	no alteration	no alteration
HS571T	no alteration	no alteration
SKMEL3	no alteration	no alteration
NCIH2030	no alteration	no alteration
HCT116	no alteration	no alteration
DU145	no alteration	no alteration
A549	no alteration	no alteration
G361	no alteration	no alteration
NCIH647	no alteration	no alteration
GAMG	no alteration	no alteration
NCIH522	no alteration	no alteration
COLO741	no alteration	no alteration
NCIH661	no alteration	no alteration
NCIH1703	no alteration	no alteration
TOV112D	no alteration	no alteration
NCIH446	no alteration	no alteration
SKMEL5	no alteration	no alteration
KYSE30	no alteration	no alteration
KYSE150	no alteration	no alteration
PATU8988T	no alteration	no alteration
U343	no alteration	no alteration
LNZ308	no alteration	no alteration
SCC25	no alteration	no alteration
UT7	no alteration	no alteration
MKN7	no alteration	no alteration
NCIH2126	no alteration	no alteration
DND41	no alteration	no alteration
CAL148	no alteration	no alteration
CAL54	no alteration	no alteration
HDQP1	no alteration	no alteration
HDLM2	no alteration	no alteration
NCIH1435	no alteration	no alteration
NCIH841	no alteration	no alteration
NCIH1944	no alteration	no alteration
BEN	no alteration	no alteration
BFTC905	no alteration	no alteration
L428	no alteration	no alteration
OCIM1	no alteration	no alteration
MOLM16	no alteration	no alteration
HRT18	no alteration	no alteration
EKVX	no alteration	no alteration
UO31	no alteration	no alteration
SW1116	no alteration	no alteration
NCIH1694	no alteration	no alteration
HOS	no alteration	no alteration
HUNS1	no alteration	no alteration
AML193	no alteration	no alteration
NCIH1184	no alteration	no alteration
HCC2157	no alteration	no alteration
TC71	no alteration	no alteration
NCIH2227	no alteration	no alteration
COLO205	no alteration	no alteration
RKN	no alteration	no alteration
OUMS23	no alteration	no alteration
SW1990	no alteration	no alteration
HS611T	no alteration	no alteration
TOLEDO	no alteration	no alteration
HT1080	no alteration	no alteration
COV318	no alteration	no alteration
CAKI1	no alteration	no alteration
NCIH716	no alteration	no alteration
NCIH2066	no alteration	no alteration
NCIH1341	no alteration	no alteration
NCIH2029	no alteration	no alteration
C3A	no alteration	no alteration
SW480	no alteration	no alteration
LU65	no alteration	no alteration
RAJI	no alteration	no alteration
SUPT1	no alteration	no alteration
HUT102	no alteration	no alteration
HCC38	no alteration	no alteration
DU4475	no alteration	no alteration
NCIH508	no alteration	no alteration
NCIH1651	no alteration	no alteration
SUPB15	no alteration	no alteration
NCIH226	no alteration	no alteration
NCIH1734	no alteration	no alteration
HS706T	no alteration	no alteration
PANC1	no alteration	no alteration
BICR16	no alteration	no alteration
BICR6	no alteration	no alteration
BHY	no alteration	no alteration
CGTHW1	no alteration	no alteration
TUHR4TKB	no alteration	no alteration
LS123	no alteration	no alteration
RCC10RGB	no alteration	no alteration
SU8686	no alteration	no alteration
HCC33	no alteration	no alteration
TE6	no alteration	no alteration
SNU1214	no alteration	no alteration
LMSU	no alteration	no alteration
OSRC2	no alteration	no alteration
HUH6	no alteration	no alteration
CJM	no alteration	no alteration
BICR22	no alteration	no alteration
TM31	no alteration	no alteration
TE4	no alteration	no alteration
PCM6	no alteration	no alteration
ECC10	no alteration	no alteration
SNU61	no alteration	no alteration
NCIH1915	no alteration	no alteration
SNU1077	no alteration	no alteration
SNU213	no alteration	no alteration
TE14	no alteration	no alteration
TE8	no alteration	no alteration
LI7	no alteration	no alteration
SNU119	no alteration	no alteration
TALL1	no alteration	no alteration
HCC1171	no alteration	no alteration
U138MG	no alteration	no alteration
SNU620	no alteration	no alteration
ECC12	no alteration	no alteration
KMS18	no alteration	no alteration
OVCAR4	no alteration	no alteration
HLF	no alteration	no alteration
SW1463	no alteration	no alteration
SF295	no alteration	no alteration
WM115	no alteration	no alteration
JHH4	no alteration	no alteration
JHH1	no alteration	no alteration
SJSA1	no alteration	no alteration
NCIH2228	no alteration	no alteration
SKMES1	no alteration	no alteration
NCIH520	no alteration	no alteration
COLO800	no alteration	no alteration
NCIH1963	no alteration	no alteration
J82	no alteration	no alteration
CALU6	no alteration	no alteration
SW900	no alteration	no alteration
UACC62	no alteration	no alteration
MFE280	no alteration	no alteration
GI1	no alteration	no alteration
A204	no alteration	no alteration
L1236	no alteration	no alteration
DANG	no alteration	no alteration
KYSE180	no alteration	no alteration
SH10TC	no alteration	no alteration
KMS21BM	no alteration	no alteration
KMS26	no alteration	no alteration
KNS60	no alteration	no alteration
KPNSI9S	no alteration	no alteration
LU99	no alteration	no alteration
KMS34	no alteration	no alteration
MKN1	no alteration	no alteration
MKN74	no alteration	no alteration
NCO2	no alteration	no alteration
HSC2	no alteration	no alteration
KG1C	no alteration	no alteration
HUH7	no alteration	no alteration
KMBC2	no alteration	no alteration
KIJK	no alteration	no alteration
KALS1	no alteration	no alteration
CMK115	no alteration	no alteration
THP1	no alteration	no alteration
HCC1954	no alteration	no alteration
AM38	no alteration	no alteration
KMS11	no alteration	no alteration
KP4	no alteration	no alteration
KE39	no alteration	no alteration
COV504	no alteration	no alteration
KE97	no alteration	no alteration
HUG1N	no alteration	no alteration
U266B1	no alteration	no alteration
NUGC4	no alteration	no alteration
HMC18	no alteration	no alteration
KMM1	no alteration	no alteration
MORCPR	no alteration	no alteration
HARA	no alteration	no alteration
CA46	no alteration	no alteration
A673	no alteration	no alteration
CAPAN1	no alteration	no alteration
NCIH1437	no alteration	no alteration
KNS62	no alteration	no alteration
HS578T	no alteration	no alteration
BT20	no alteration	no alteration
SNU182	no alteration	no alteration
SKNMC	no alteration	no alteration
HH	no alteration	no alteration
FADU	no alteration	no alteration
SJRH30	no alteration	no alteration
RDES	no alteration	no alteration
CAL27	no alteration	no alteration
GCT	no alteration	no alteration
SKBR3	no alteration	no alteration
SNU16	no alteration	no alteration
NCIH82	no alteration	no alteration
U2OS	no alteration	no alteration
H4	no alteration	no alteration
GDM1	no alteration	no alteration
T24	no alteration	no alteration
G401	no alteration	no alteration
D283MED	no alteration	no alteration
SCC9	no alteration	no alteration
NMCG1	no alteration	no alteration
TEN	no alteration	no alteration
TE9	no alteration	no alteration
KYSE520	no alteration	no alteration
YH13	no alteration	no alteration
NCIH2052	no alteration	no alteration
SCC4	no alteration	no alteration
HCC1187	no alteration	no alteration
SNU387	no alteration	no alteration
MJ	no alteration	no alteration
JM1	no alteration	no alteration
C2BBE1	no alteration	no alteration
BXPC3	no alteration	no alteration
NCIH1355	no alteration	no alteration
HCC95	no alteration	no alteration
RPMI7951	no alteration	no alteration
COLO783	no alteration	no alteration
BICR31	no alteration	no alteration
WM983B	no alteration	no alteration
DMS273	no alteration	no alteration
FTC133	no alteration	no alteration
MDAMB435S	no alteration	no alteration
WM1799	no alteration	no alteration
MEWO	no alteration	no alteration
NCIH2081	no alteration	no alteration
JHH6	no alteration	no alteration
COV644	no alteration	no alteration
PECAPJ15	no alteration	no alteration
CORL88	no alteration	no alteration
CORL51	no alteration	no alteration
RT11284	no alteration	no alteration
PECAPJ41CLONED2	no alteration	no alteration
HT55	no alteration	no alteration
MDST8	no alteration	no alteration
LC1SQSF	no alteration	no alteration
SUPM2	no alteration	no alteration
OVCAR8	no alteration	no alteration
NCIH596	no alteration	no alteration
KARPAS299	no alteration	no alteration
UMUC1	no alteration	no alteration
U118MG	no alteration	no alteration
RH30	no alteration	no alteration
SNU601	no alteration	no alteration
CAL33	no alteration	no alteration
SNU668	no alteration	no alteration
CORL279	no alteration	no alteration
GB1	no alteration	no alteration
KURAMOCHI	no alteration	no alteration
COLO775	no alteration	no alteration
COLO684	no alteration	no alteration
GRM	no alteration	no alteration
SNU685	no alteration	no alteration
SNU886	no alteration	no alteration
NCCSTCK140	no alteration	no alteration
NCIH3255	no alteration	no alteration
SNU719	no alteration	no alteration
SNU489	no alteration	no alteration
A2058	no alteration	no alteration
HTK	no alteration	no alteration
SNU201	no alteration	no alteration
SNU1196	no alteration	no alteration
NCIH854	no alteration	no alteration
YD38	no alteration	no alteration
SNU1105	no alteration	no alteration
SNU283	no alteration	no alteration
SNU46	no alteration	no alteration
SNU308	no alteration	no alteration
YD8	no alteration	no alteration
SNU245	no alteration	no alteration
SNU410	no alteration	no alteration
SNU899	no alteration	no alteration
SNU503	no alteration	no alteration
SET2	no alteration	no alteration
SNU869	no alteration	no alteration
SNU878	no alteration	no alteration
SNU840	no alteration	no alteration
SNU8	no alteration	no alteration
IGR39	no alteration	no alteration
DAOY	no alteration	no alteration
HEP3B217	no alteration	no alteration
KYM1	no alteration	no alteration
HLE	no alteration	no alteration
CMK	no alteration	no alteration
T3M4	no alteration	no alteration
COLO818	no alteration	no alteration
PK45H	no alteration	no alteration
CPCN	no alteration	no alteration
NUGC2	no alteration	no alteration
NCIH929	no alteration	no alteration
D341MED	no alteration	no alteration
NCIH660	no alteration	no alteration
NCIH1618	no alteration	no alteration
PEER	no alteration	no alteration
SKM1	no alteration	no alteration
HT144	no alteration	no alteration
SKMEL31	no alteration	no alteration
OCILY3	no alteration	no alteration
NCIH69	no alteration	no alteration
KG1	no alteration	no alteration
HCC70	no alteration	no alteration
NCIH2452	no alteration	no alteration
LOUCY	no alteration	no alteration
HCC56	no alteration	no alteration
MPP89	no alteration	no alteration
MG63	no alteration	no alteration
NCIH1373	no alteration	no alteration
NCIH1838	no alteration	no alteration
NCIH1836	no alteration	no alteration
PANC0504	no alteration	no alteration
BL70	no alteration	no alteration
CI1	no alteration	no alteration
RCM1	no alteration	no alteration
A101D	no alteration	no alteration
NCIH1755	no alteration	no alteration
HS729	no alteration	no alteration
JHOS2	no alteration	no alteration
U937	no alteration	no alteration
SKLMS1	no alteration	no alteration
MEG01	no alteration	no alteration
ONS76	no alteration	no alteration
RPMI6666	no alteration	no alteration
SNUC1	no alteration	no alteration
SKNDZ	no alteration	no alteration
OCILY10	no alteration	no alteration
SW1353	no alteration	no alteration
LN18	no alteration	no alteration
CAOV3	no alteration	no alteration
HEPG2	no alteration	no alteration
NCIH524	no alteration	no alteration
MCAS	no alteration	no alteration
COLO829	no alteration	no alteration
COLO704	no alteration	no alteration
EFM192A	no alteration	no alteration
NCIH889	no alteration	no alteration
NCIH211	no alteration	no alteration
MDAPCA2B	no alteration	no alteration
K029AX	no alteration	no alteration
NCIH2171	no alteration	no alteration
PANC1005	no alteration	no alteration
EVSAT	no alteration	no alteration
HS695T	no alteration	no alteration
CHL1	no alteration	no alteration
LOUNH91	no alteration	no alteration
LK2	no alteration	no alteration
ASPC1	no alteration	no alteration
NCIH441	no alteration	no alteration
RERFLCSQ1	no alteration	no alteration
HMCB	no alteration	no alteration
FUOV1	no alteration	no alteration
MALME3M	no alteration	no alteration
KMS12BM	no alteration	no alteration
T98G	no alteration	no alteration
HL60	no alteration	no alteration
DBTRG05MG	no alteration	no alteration
HEYA8	no alteration	no alteration
NCIH2122	no alteration	no alteration
MELJUSO	no alteration	no alteration
SW620	no alteration	no alteration
L33	no alteration	no alteration
SKMEL2	no alteration	no alteration
NCIH1975	no alteration	no alteration
COLO679	no alteration	no alteration
MDAMB453	no alteration	no alteration
PANC0403	no alteration	no alteration
MELHO	no alteration	no alteration
RL	no alteration	no alteration
GMS10	no alteration	no alteration
SEM	no alteration	no alteration
HCC44	no alteration	no alteration
HDMYZ	no alteration	no alteration
HCC78	no alteration	no alteration
YKG1	no alteration	no alteration
U251MG	no alteration	no alteration
TE11	no alteration	no alteration
KS1	no alteration	no alteration
TE1	no alteration	no alteration
MOGGUVW	no alteration	no alteration
RERFLCAD1	no alteration	no alteration
TE5	no alteration	no alteration
KELLY	no alteration	no alteration
NCIH1155	no alteration	no alteration
ABC1	no alteration	no alteration
DETROIT562	no alteration	no alteration
ACHN	no alteration	no alteration
SCABER	no alteration	no alteration
SKMEL30	no alteration	no alteration
PANC0327	no alteration	no alteration
RPMI8226	no alteration	no alteration
ES2	no alteration	no alteration
NCIH1781	no alteration	no alteration
LS1034	no alteration	no alteration
G402	no alteration	no alteration
SW403	no alteration	no alteration
SW1417	no alteration	no alteration
MDAMB415	no alteration	no alteration
SW579	no alteration	no alteration
BT549	no alteration	no alteration
CAL851	no alteration	no alteration
EFO21	no alteration	no alteration
A375	no alteration	no alteration
HT29	no alteration	no alteration
HS294T	no alteration	no alteration
TCCPAN2	no alteration	no alteration
RMGI	no alteration	no alteration
PC3	no alteration	no alteration
K562	no alteration	no alteration
RT112	no alteration	no alteration
U87MG	no alteration	no alteration
CAKI2	no alteration	no alteration
OE19	no alteration	no alteration
JHH2	no alteration	no alteration
MV411	no alteration	no alteration
WM2664	no alteration	no alteration
KMRC1	no alteration	no alteration
T84	no alteration	no alteration
CALU1	no alteration	no alteration
NCIH2170	no alteration	no alteration
SQ1	no alteration	no alteration
NCIH2444	no alteration	no alteration
UACC257	no alteration	no alteration
KYSE510	no alteration	no alteration
MOLM13	no alteration	no alteration
HUPT4	no alteration	no alteration
MOGGCCM	no alteration	no alteration
PSN1	no alteration	no alteration
NCIH1299	no alteration	no alteration
IGR37	no alteration	no alteration
LN443	no alteration	no alteration
SLR23	no alteration	no alteration
HMEL	no alteration	no alteration
OELE	no alteration	no alteration
LN235	no alteration	no alteration
EWS502	no alteration	no alteration
SALE	no alteration	no alteration
HCC2814	no alteration	no alteration
TC32	no alteration	no alteration
SF172	no alteration	no alteration
PRECLH	no alteration	no alteration
SLR25	no alteration	no alteration
U178	no alteration	no alteration
HEKTE	no alteration	no alteration
A1207	no alteration	no alteration
LN319	no alteration	no alteration
LN382	no alteration	no alteration
SLR21	no alteration	no alteration
LN340	no alteration	no alteration
SLR20	no alteration	no alteration
UOK101	no alteration	no alteration
JHESOAD1	no alteration	no alteration
CH157MN	no alteration	no alteration
MOLP2	no alteration	no alteration
HCC1806	no alteration	no alteration
MONOMAC6	no alteration	no alteration
SW1710	no alteration	no alteration
MOLT13	no alteration	no alteration
SR786	no alteration	no alteration
NCIH2141	no alteration	no alteration
HCC827	no alteration	no alteration
RD	no alteration	no alteration
TF1	no alteration	no alteration
ALLSIL	no alteration	no alteration
KASUMI2	no alteration	no alteration
ME1	no alteration	no alteration
JJN3	no alteration	no alteration
NUDHL1	no alteration	no alteration
KYO1	no alteration	no alteration
JL1	no alteration	no alteration
NALM19	no alteration	no alteration
HPBALL	no alteration	no alteration
CL40	no alteration	no alteration
HCC1500	no alteration	no alteration
HCC1599	no alteration	no alteration
OCIAML3	no alteration	no alteration
SUDHL10	no alteration	no alteration
SUDHL4	no alteration	no alteration
RH41	no alteration	no alteration
MOLM6	no alteration	no alteration
KASUMI6	no alteration	no alteration
UACC893	no alteration	no alteration
MINO	no alteration	no alteration
COLO680N	no alteration	no alteration
LAMA84	no alteration	no alteration
EHEB	no alteration	no alteration
BV173	no alteration	no alteration
DOHH2	no alteration	no alteration
LXF289	no alteration	no alteration
MONOMAC1	no alteration	no alteration
PL21	no alteration	no alteration
NALM1	no alteration	no alteration
OCIAML2	no alteration	no alteration
MHHCALL3	no alteration	no alteration
KE37	no alteration	no alteration
JK1	no alteration	no alteration
L540	no alteration	no alteration
CAL78	no alteration	no alteration
MHHCALL4	no alteration	no alteration
MUTZ5	no alteration	no alteration
ONCODG1	no alteration	no alteration
CAL29	no alteration	no alteration
SCLC21H	no alteration	no alteration
CALU3	no alteration	no alteration
NCIH2009	no alteration	no alteration
HCC4006	no alteration	no alteration
HCC1428	no alteration	no alteration
KU812	no alteration	no alteration
PFEIFFER	no alteration	no alteration
DEL	no alteration	no alteration
COLO320	no alteration	no alteration
RPMI8402	no alteration	no alteration
SUDHL1	no alteration	no alteration
P12ICHIKAWA	no alteration	no alteration
BFTC909	no alteration	no alteration
MHHES1	no alteration	no alteration
NOMO1	no alteration	no alteration
NCIH727	no alteration	no alteration
HCC2935	no alteration	no alteration
KCL22	no alteration	no alteration
CADOES1	no alteration	no alteration
OPM2	no alteration	no alteration
CAL62	no alteration	no alteration
MHHCALL2	no alteration	no alteration
M07E	no alteration	no alteration
MOLT16	no alteration	no alteration
NB4	no alteration	no alteration
LCLC97TM1	no alteration	no alteration
BHT101	no alteration	no alteration
JVM2	no alteration	no alteration
KMH2	no alteration	no alteration
NUDUL1	no alteration	no alteration
BC3C	no alteration	no alteration
KARPAS620	no alteration	no alteration
SIGM5	no alteration	no alteration
BCPAP	no alteration	no alteration
CL34	no alteration	no alteration
RCHACV	no alteration	no alteration
RH18	no alteration	no alteration
WSUDLCL2	no alteration	no alteration
ML1	no alteration	no alteration
AMO1	no alteration	no alteration
MOLP8	no alteration	no alteration
NCIH2073	no alteration	no alteration
HN	no alteration	no alteration
PLB985	no alteration	no alteration
HOP62	no alteration	no alteration
OVCAR5	no alteration	no alteration
SF268	no alteration	no alteration
SNB75	no alteration	no alteration
HOP92	no alteration	no alteration
HS604T	no alteration	no alteration
HS751T	no alteration	no alteration
SF767	no alteration	no alteration
HS274T	no alteration	no alteration
S117	no alteration	no alteration
EW8	no alteration	P1019L
JVM3	no alteration	P1435L
LCLC103H	no alteration	P1481S
A253	no alteration	P1774T
TGBC11TKB	no alteration	P618L
NCIH526	no alteration	P995S
KO52	no alteration	Q126_Q131dup
JHOM1	no alteration	Q127_Q131del
HS944T	no alteration	Q127_Q131del, S1882F
SW1783	no alteration	Q1328H
IPC298	no alteration	Q1362* (driver)
HS936T	no alteration	Q1675* (driver)
LP1	no alteration	R1495C
NCIH1568	no alteration	R1808L
HUCCT1	no alteration	R1944* (driver)
NALM6	no alteration	R2107H
TE10	no alteration	R557Q
SKMEL24	no alteration	S1524W
C32	no alteration	S1642F
JHOM2B	no alteration	S270_A272del
SNU407	no alteration	S451P, A1527V
SNU478	no alteration	S49F
SNU1197	no alteration	S776R
NCIH2342	no alteration	T1657S
CAS1	no alteration	V1004L
HT115	no alteration	V602A
SNU738	no alteration	Y613C, HOMDEL (driver)
KOPN8	P109S	no alteration
CCFSTTG1	P1144T	R1855G
REH	P1175Hfs*5 (driver), A873T	G1442R
LS411N	P1326Rfs*155 (driver)	P662R
SKMEL28	P1456L	no alteration
HEC265	P1468Lfs*13 (driver)	no alteration
NCIH838	P1876Sfs*22 (driver)	no alteration
DAUDI	P227Q, Q1579P, N2044D, P153A, A226P, S317G, E1444D, S265del	C295Y, G360S, A363S, M479L, M479I
BICR18	P227Q, Q1579P, N2044D, S1197P, P153A, E1444D, A226P, A349V, S584P, S949P, S265del, A348_A349del, Q1334dup, Q1331_Q1334dup	G278S, M479L, M479I
SHP77	P253S	no alteration
VMRCLCD	P533A	no alteration
OAW42	P559Lfs*63 (driver), A1119Cfs*4 (driver)	no alteration
HCC2279	P697L	no alteration
IGR1	P776S	HOMDEL (driver)
NCIH2106	P916L	P1474S, Y2040H
LOXIMVI	Q1212* (driver)	no alteration
MDAMB134VI	Q1212* (driver)	no alteration
KMS28BM	Q1399P	HOMDEL (driver)
NCIH1563	Q1411* (driver), HOMDEL (driver)	no alteration
TCCSUP	Q1452Rfs*29 (driver)	H1508Y
SNU216	Q1458* (driver)	no alteration
MFE319	Q1741Sfs*20 (driver), P1576L, D2277G	T2168M
HEC1B	Q1835* (driver), Q2115* (driver), G1761C	HOMDEL (driver)
HEC1A	Q1835* (driver), Q2115* (driver), Q404H, G1761C	G305C, A485T, V1107I
SUDHL6	Q200* (driver)	no alteration
KARPAS422	Q2176Rfs*48 (driver)	Q129_Q131del
OVTOKO	Q2209Sfs*22 (driver)	no alteration
MIAPACA2	Q321* (driver), P1940L	HOMDEL (driver)
GA10	Q372Sfs*19 (driver)	no alteration
ST486	Q372Sfs*19 (driver)	no alteration
FTC238	Q425R	no alteration
HEC59	Q428* (driver), F2141Sfs*59 (driver), A160V	no alteration
RI1	Q474* (driver)	HOMDEL (driver)
EB2	Q501* (driver)	no alteration
EB1	Q501* (driver)	no alteration
HS766T	Q538* (driver)	no alteration
SUIT2	Q546* (driver), HOMDEL (driver)	HOMDEL (driver)
L363	Q553E	HOMDEL (driver)
SKOV3	Q586* (driver)	no alteration
JIMT1	Q586del	no alteration
RVH421	Q605* (driver)	no alteration
A4FUK	Q74* (driver)	no alteration
NCIH1436	Q766Sfs*67 (driver)	no alteration
SNUC5	Q766Sfs*67 (driver), W1073Mfs*32 (driver)	V1107I
T47D	Q944* (driver)	no alteration
RS411	R1109Q	P448S
OC316	R1276* (driver), Q1947* (driver), Y1260Tfs*9 (driver)	no alteration
OC314	R1276* (driver), Q1947* (driver), Y1260Tfs*9 (driver)	no alteration
MDAMB175VII	R1501Afs*2 (driver), HOMDEL (driver)	no alteration
A3KAW	R1658Q, P98S	R1802Q
NCIH2172	R1721Dfs*4 (driver)	no alteration
NCIH1581	R1833C	no alteration
CMLT1	R1845Q	P715S
KYSE70	R1989* (driver)	no alteration
JHUEM7	R1989* (driver), M1224V, R2232W	R1802Q
HCT15	R270H	G330* (driver), R1624* (driver)
EJM	R635K	no alteration
JMSU1	R911fs (driver)	no alteration
HT1376	S186Rfs*209 (driver), T1302S	no alteration
HT1197	S2256* (driver), S2264L	no alteration
OVMANA	S2264* (driver), Q1332* (driver)	no alteration
VMCUB1	S552* (driver)	no alteration
EFE184	S552Yfs*67 (driver)	no alteration
BDCM	S614A	no alteration
OE21	S638I	no alteration
COLO792	S764F	HOMDEL (driver)
P31FUJ	T1514Rfs*13 (driver), P1568H	no alteration
BL41	T1649Nfs*49 (driver)	no alteration
PATU8902	T294Hfs*106 (driver)	no alteration
PANC0203	T572M, L2239P	HOMDEL (driver)
MHHNB11	X1367_splice (driver)	no alteration
SW1088	X640_splice (driver)	no alteration
CHAGOK1	X641_splice (driver), H684D	no alteration
KU1919	Y1052* (driver)	no alteration
HEC50B	Y148* (driver)	ARID1B-RPS20, AMP
