# Supplementary material for: Molecular subtyping of endometrial carcinoma cell lines uncovers subtype-specific targetable vulnerabilities
Source: Research Square preprint supplement (doi:10.21203/rs.3.rs-6536216/v1), 2025-05-10
Supplement: Supplementary file 2 [file 4b8d87576d30d7513e4fe001.xlsx]

## Sheet: Mutated_Genes
Table S2. The STR results of in-house developed endometrial cancer cell lines.
Gene	MutSig(Q-value)	# Mut	#	Profiled Samples	Freq	Is Cancer Gene (source: OncoKB)
TP53	1.31e-12	55	55	60	0.917	Yes
PIK3CA	1.31e-12	31	28	60	0.467	Yes
FBXW7	0	14	13	60	0.217	Yes
PPP2R1A	1.31e-12	13	13	60	0.217	Yes
PIK3R1	1.31e-12	10	8	60	0.133	Yes
CHD4	1.1e-08	8	8	60	0.133	Yes
ARHGAP35		8	7	60	0.117	Yes
PTEN	0	11	6	60	0.1	Yes
TTN		6	6	60	0.1	No
CSMD3		8	6	60	0.1	No
HERC1		5	5	60	0.083	No
ADGRG4		5	5	60	0.083	Yes
MUC16		5	5	60	0.083	No
OBSCN		6	5	60	0.083	No
COL11A1		6	5	60	0.083	No
DMD		5	5	60	0.083	No
ABCA13		6	5	60	0.083	No
EYS		5	5	60	0.083	No
RYR2		5	5	60	0.083	No
FAT1		5	4	60	0.067	Yes
FAT4		4	4	60	0.067	Yes
GIGYF2		4	4	60	0.067	No
ZFHX3		4	4	60	0.067	Yes
AKAP9		4	4	60	0.067	No
POLQ		4	4	60	0.067	Yes
SPOP	6.77e-13	3	3	60	0.05	Yes
ITGA8		3	3	60	0.05	No
APOB		3	3	60	0.05	No
FAM9A	0.000241	3	3	60	0.05	No
MUC12		3	3	60	0.05	No
CYLC1	0.0498	3	3	60	0.05	No
FBN1		3	3	60	0.05	No
PKD1L1		3	3	60	0.05	No
MUC5B		3	3	60	0.05	No
MROH2B		3	3	60	0.05	No
SYNE1		3	3	60	0.05	No
CATSPER1		3	3	60	0.05	No
TULP4		3	3	60	0.05	No
XIRP2		3	3	60	0.05	No
COG7		3	3	60	0.05	No
MAGEB6		3	3	60	0.05	No
SPTBN2		3	3	60	0.05	No
TENM3		3	3	60	0.05	No
FGFR2	9.47e-12	3	3	60	0.05	Yes
MYH1		3	3	60	0.05	No
CDH19		3	3	60	0.05	No
DICER1		3	3	60	0.05	Yes
ZFYVE16		3	3	60	0.05	No
ABCA4		3	3	60	0.05	No
NFE2L3		3	3	60	0.05	No
LRP6		3	3	60	0.05	Yes
MGA		3	3	60	0.05	Yes
USH2A		3	3	60	0.05	No
PTPRK		3	3	60	0.05	Yes
FOXA2	5.51e-05	4	3	60	0.05	No
SCN8A		3	3	60	0.05	No
MSN		3	3	60	0.05	Yes
ZFHX4		3	3	60	0.05	No
IL6		3	3	60	0.05	No
DDX42		3	3	60	0.05	No
TAF1		3	3	60	0.05	Yes
TRIO		3	3	60	0.05	No
PLCE1		3	3	60	0.05	No
FZD3		3	3	60	0.05	No
MYOM1		3	3	60	0.05	No
MYOM2		3	3	60	0.05	No
TECTA		3	3	60	0.05	No
AHNAK2		4	3	60	0.05	No
XRN1		3	3	60	0.05	No
STAB2		3	3	60	0.05	No
IGFN1		3	3	60	0.05	No
PRPF18		3	3	60	0.05	No
AKAP6		3	3	60	0.05	No
ERBIN		3	3	60	0.05	No
NID2		3	3	60	0.05	No
PDZD2		3	3	60	0.05	No
ARID1A	2.17e-11	3	3	60	0.05	Yes
ZC3H12B		2	2	60	0.033	No
ZNF25		2	2	60	0.033	No
RNF214		2	2	60	0.033	No
ADAMTS19		2	2	60	0.033	No
FAT2		2	2	60	0.033	No
ARHGAP4		2	2	60	0.033	No
ZNF41		2	2	60	0.033	No
TEX11		2	2	60	0.033	No
SLC39A10		2	2	60	0.033	No
MMP16		2	2	60	0.033	No
PXDN		2	2	60	0.033	No
PKN3		2	2	60	0.033	No
NRAP		2	2	60	0.033	No
COL22A1		2	2	60	0.033	No
CCDC6		2	2	60	0.033	Yes
ADGRL3		2	2	60	0.033	No
KCNH7		2	2	60	0.033	No
CCDC144A		2	2	60	0.033	No
HTR1F		2	2	60	0.033	No
IBTK		2	2	60	0.033	No
ITGB2		2	2	60	0.033	No
DYSF		2	2	60	0.033	No
ADGRV1		2	2	60	0.033	No
VPS13C		2	2	60	0.033	No
NRG1		2	2	60	0.033	Yes
MYO3B		2	2	60	0.033	No
CERS2		2	2	60	0.033	No
LRTM2		2	2	60	0.033	No
NTRK1		2	2	60	0.033	Yes
PPAN		2	2	60	0.033	No
HERC2		2	2	60	0.033	No
ADGRA2		2	2	60	0.033	Yes
RIN3		2	2	60	0.033	No
MYCBP2		2	2	60	0.033	No
SPHKAP		2	2	60	0.033	No
PTK2		2	2	60	0.033	No
PCLO		2	2	60	0.033	Yes
PCDHB14		2	2	60	0.033	No
PRDM9		2	2	60	0.033	No
ACTG1		2	2	60	0.033	Yes
GEN1		2	2	60	0.033	Yes
MORC3		2	2	60	0.033	No
MORC4	0.0498	2	2	60	0.033	No
ZNF99		2	2	60	0.033	No
POU3F2		2	2	60	0.033	Yes
WDFY4		2	2	60	0.033	No
CACNA1F		3	2	60	0.033	No
CACNA1E		2	2	60	0.033	No
RHPN2		2	2	60	0.033	No
QSER1		2	2	60	0.033	No
SYT5		2	2	60	0.033	No
MUC17		2	2	60	0.033	No
LDB2		2	2	60	0.033	No
TTC27		2	2	60	0.033	No
DNAH3		2	2	60	0.033	No
DNAH7		2	2	60	0.033	No
DNAH6		2	2	60	0.033	No
SV2A		2	2	60	0.033	No
CLVS2		2	2	60	0.033	No
ERCC4		2	2	60	0.033	Yes
KRAS	1.31e-12	2	2	60	0.033	Yes
ADARB2		2	2	60	0.033	Yes
WDR87		2	2	60	0.033	No
CDK5RAP2		2	2	60	0.033	No
DDX18		2	2	60	0.033	No
TAAR6		2	2	60	0.033	No
CFB		2	2	60	0.033	No
FREM3		2	2	60	0.033	No
PRDM14		2	2	60	0.033	Yes
FAM171A1		2	2	60	0.033	No
SETD1B		2	2	60	0.033	Yes
SMG7		2	2	60	0.033	No
C1QTNF5		2	2	60	0.033	No
COQ10A		2	2	60	0.033	No
PLIN4		2	2	60	0.033	No
ADCY8		2	2	60	0.033	No
RIMS2		2	2	60	0.033	No
IPO8		2	2	60	0.033	No
TNN		2	2	60	0.033	No
IL13RA1		2	2	60	0.033	No
MAGEL2		2	2	60	0.033	No
UBR4		2	2	60	0.033	No
TPO		2	2	60	0.033	No
DVL3		2	2	60	0.033	No
TMEM132D		2	2	60	0.033	No
LRFN5		2	2	60	0.033	No
NBEA		2	2	60	0.033	No
CSPG4		2	2	60	0.033	No
TRO		3	2	60	0.033	No
CEP170		2	2	60	0.033	No
SMC1A		2	2	60	0.033	Yes
HDAC5		2	2	60	0.033	No
NLRC3		2	2	60	0.033	No
HECTD4		2	2	60	0.033	No
APOBR		2	2	60	0.033	No
FRAS1		2	2	60	0.033	No
ASXL3		2	2	60	0.033	No
OR5D13	0.0967	2	2	60	0.033	No
COG1		2	2	60	0.033	No
MAGEC3		2	2	60	0.033	No
ZRANB1		2	2	60	0.033	No
PUM1		2	2	60	0.033	Yes
TENM1		2	2	60	0.033	No
AHCTF1		2	2	60	0.033	No
ZNF808		2	2	60	0.033	No
IFT70A		2	2	60	0.033	No
FAM47A		2	2	60	0.033	No
GBF1		2	2	60	0.033	No
QPCT		2	2	60	0.033	No
AMOT		2	2	60	0.033	No
DOCK10		2	2	60	0.033	No
CWC22		2	2	60	0.033	No
LIG1		3	2	60	0.033	No
GOLGA6L2		2	2	60	0.033	No
LIFR		2	2	60	0.033	Yes
LPA		2	2	60	0.033	No
CBX6		2	2	60	0.033	No
CPSF2		2	2	60	0.033	No
DIAPH1		2	2	60	0.033	No
HEPH		2	2	60	0.033	No
RBM5		2	2	60	0.033	No
DCC		2	2	60	0.033	No
LSR		2	2	60	0.033	No
MYH2		2	2	60	0.033	No
THRAP3		2	2	60	0.033	No
NRXN2		2	2	60	0.033	No
ATP1A2		2	2	60	0.033	No
OR2T33		2	2	60	0.033	No
TENT2		2	2	60	0.033	No
OPCML		2	2	60	0.033	No
ZNF292		2	2	60	0.033	Yes
OR4K15		2	2	60	0.033	No
HPR		2	2	60	0.033	No
PCNX4		2	2	60	0.033	No
HMGXB4		2	2	60	0.033	No
ZNF267	0.0358	2	2	60	0.033	No
SRPX		2	2	60	0.033	No
PIGN		2	2	60	0.033	No
EFCAB5		2	2	60	0.033	No
LRRC43		2	2	60	0.033	No
TLR10		2	2	60	0.033	No
LRRC18		2	2	60	0.033	No
BTAF1		2	2	60	0.033	No
FLNA		2	2	60	0.033	No
ANO10		2	2	60	0.033	No
FLNC		2	2	60	0.033	No
CSMD2		2	2	60	0.033	No
TRMT10B		2	2	60	0.033	No
GK		2	2	60	0.033	No
SLC9C2		4	2	60	0.033	No
ZBTB33		2	2	60	0.033	No
CPB1		2	2	60	0.033	No
BCL2L11		2	2	60	0.033	Yes
PTPRD		2	2	60	0.033	Yes
GNL3L		3	2	60	0.033	No
ERC1		2	2	60	0.033	Yes
DST		2	2	60	0.033	No
PEG3		2	2	60	0.033	No
OVCH1		2	2	60	0.033	No
SLCO1C1		2	2	60	0.033	No
BDP1		2	2	60	0.033	No
CNTNAP5		2	2	60	0.033	No
SLITRK2		2	2	60	0.033	No
NELL2		2	2	60	0.033	No
PTPN3		2	2	60	0.033	No
EPHA5		2	2	60	0.033	Yes
PCDH15		2	2	60	0.033	No
PCDH12		3	2	60	0.033	No
SI		2	2	60	0.033	No
SEC31A		2	2	60	0.033	Yes
RPL27A		2	2	60	0.033	No
TASOR2		2	2	60	0.033	No
DHX29		2	2	60	0.033	No
PTPRQ		2	2	60	0.033	No
SCML2		2	2	60	0.033	No
AASS		2	2	60	0.033	No
ZNF780B		2	2	60	0.033	No
SATB1		2	2	60	0.033	No
AASDHPPT		2	2	60	0.033	No
PLEKHA6		2	2	60	0.033	No
JADE3		2	2	60	0.033	No
PHRF1		2	2	60	0.033	No
KIF5A		2	2	60	0.033	No
PAMR1		2	2	60	0.033	No
MID1		2	2	60	0.033	No
NPHP3		2	2	60	0.033	No
RBM25		2	2	60	0.033	No
CHD6		2	2	60	0.033	No
AFF3		2	2	60	0.033	Yes
RBM15		2	2	60	0.033	Yes
ARHGEF17		2	2	60	0.033	No
VCAN		2	2	60	0.033	No
ATP2C1		2	2	60	0.033	No
CLMN		2	2	60	0.033	No
LAMB1		2	2	60	0.033	No
VIM		2	2	60	0.033	No
NAA15		2	2	60	0.033	No
VIT		2	2	60	0.033	No
H2AC17		2	2	60	0.033	Yes
CLP1		2	2	60	0.033	Yes
OR11G2		2	2	60	0.033	No
SYTL5		2	2	60	0.033	No
UNC13D		2	2	60	0.033	No
KIAA1217		2	2	60	0.033	No
LCE2C		2	2	60	0.033	No
CDK17		2	2	60	0.033	No
ZNF142		2	2	60	0.033	No
DNAH10		2	2	60	0.033	No
OR5P2		2	2	60	0.033	No
CDK12		2	2	60	0.033	Yes
FMN2		2	2	60	0.033	No
CHL1		2	2	60	0.033	No
ANXA7		2	2	60	0.033	No
PAX8		2	2	60	0.033	Yes
ANKRD50		2	2	60	0.033	No
AOC3		2	2	60	0.033	No
GPR4		2	2	60	0.033	No
KTN1		2	2	60	0.033	Yes
ALMS1		2	2	60	0.033	No
COL16A1		2	2	60	0.033	No
DACH2		2	2	60	0.033	No
CDH8		2	2	60	0.033	No
CDH7		2	2	60	0.033	No
MITF		2	2	60	0.033	Yes
SEMA7A		2	2	60	0.033	No
NOTCH4		2	2	60	0.033	Yes
ITPR1		2	2	60	0.033	No
ITPR2		2	2	60	0.033	No
NEB		2	2	60	0.033	No
ITGA10		2	2	60	0.033	No
LZTR1		2	2	60	0.033	Yes
CNOT8		2	2	60	0.033	No
EIF4G3		2	2	60	0.033	No
ZNF529		2	2	60	0.033	No
HYDIN		3	2	60	0.033	No
CNGB3		2	2	60	0.033	No
PKHD1L1		2	2	60	0.033	No
SLC24A2		2	2	60	0.033	No
AMBRA1		4	2	60	0.033	No
ANKRD30B		2	2	60	0.033	No
PLCL1		2	2	60	0.033	No
NFASC		2	2	60	0.033	No
INSC		2	2	60	0.033	No
PSG1		2	2	60	0.033	No
ACSL4		2	2	60	0.033	No
PAPPA		2	2	60	0.033	No
OR6C1		2	2	60	0.033	No
OTOF		2	2	60	0.033	No
CDSN		2	2	60	0.033	No
STAG2		2	2	60	0.033	Yes
TRMT13		2	2	60	0.033	No
RYR3		2	2	60	0.033	No
GLIPR1		2	2	60	0.033	No
LRRIQ1		2	2	60	0.033	No
FATE1		2	2	60	0.033	No
DLC1		2	2	60	0.033	No
CTNNB1	1.31e-12	2	2	60	0.033	Yes
TJP3		2	2	60	0.033	No
ARHGAP44		2	2	60	0.033	No
DSCAM		2	2	60	0.033	No
MYH15		2	2	60	0.033	No
FOLH1		2	2	60	0.033	Yes
COL4A4		2	2	60	0.033	No
OR6K3		2	2	60	0.033	No
USP54		2	2	60	0.033	No
DNAJC22		2	2	60	0.033	No
ARHGAP17		2	2	60	0.033	No
PDZD4		2	2	60	0.033	No
ARHGAP20		3	2	60	0.033	No
HSPA4		2	2	60	0.033	No
DNAJC11		2	2	60	0.033	No
ACSF2		2	2	60	0.033	No
NFKBIA		2	2	60	0.033	Yes
ARHGAP32		2	2	60	0.033	No
ARHGAP31		2	2	60	0.033	No
SRPRA		2	2	60	0.033	No
USP36		2	2	60	0.033	No
DOCK3		2	2	60	0.033	No
FGA		2	2	60	0.033	No
NPY5R		2	2	60	0.033	No
PCDHGA4		2	2	60	0.033	No
KCNA10		2	2	60	0.033	No
UACA		2	2	60	0.033	No
ERBB4		2	2	60	0.033	Yes
PDE6A		2	2	60	0.033	No
CLASP2		2	2	60	0.033	No
CADPS		2	2	60	0.033	No
ZFC3H1		2	2	60	0.033	No
TSPEAR		2	2	60	0.033	No
PIKFYVE		2	2	60	0.033	No
ATF2		1	1	60	0.017	No
SLC4A1AP		1	1	60	0.017	No
ZC3H12D		1	1	60	0.017	No
ENDOU		1	1	60	0.017	No
PRKACG		1	1	60	0.017	No
AKT3		1	1	60	0.017	Yes
GPBP1		1	1	60	0.017	No
ZC3H12A		1	1	60	0.017	No
BBX		1	1	60	0.017	No
PKNOX1		1	1	60	0.017	No
PRKACA		1	1	60	0.017	Yes
UNC5B		1	1	60	0.017	No
CACNA2D3		1	1	60	0.017	No
CACNA2D2		1	1	60	0.017	No
UNC5D		1	1	60	0.017	No
PRKAB1		1	1	60	0.017	No
CTAGE1		1	1	60	0.017	No
EWSR1		1	1	60	0.017	Yes
ASPHD1		1	1	60	0.017	No
AGTR1		1	1	60	0.017	No
ORAI2		1	1	60	0.017	No
TXNIP		1	1	60	0.017	No
PLBD1		1	1	60	0.017	No
ORAI1		1	1	60	0.017	No
ASPHD2		1	1	60	0.017	No
CCDC169-SOHLH2		1	1	60	0.017	No
ATF3		1	1	60	0.017	No
SF1		1	1	60	0.017	No
FLG		1	1	60	0.017	No
URI1		1	1	60	0.017	No
CDCA2		1	1	60	0.017	No
NPRL3		1	1	60	0.017	No
PDGFB		1	1	60	0.017	Yes
PDGFA		1	1	60	0.017	No
CDCA8		1	1	60	0.017	No
GATA3		1	1	60	0.017	Yes
ZC3HAV1		1	1	60	0.017	No
TEX26		1	1	60	0.017	No
PLA2G6		1	1	60	0.017	No
ADAMTS12		1	1	60	0.017	No
GATA1		1	1	60	0.017	Yes
DEDD2		1	1	60	0.017	No
ADAMTS16		1	1	60	0.017	No
KRTAP5-10		1	1	60	0.017	No
C12ORF56		1	1	60	0.017	No
SCGB1D1		1	1	60	0.017	No
EPB41L1		1	1	60	0.017	No
NPBWR2		1	1	60	0.017	No
PIP5K1B		1	1	60	0.017	No
ATG7		1	1	60	0.017	No
JAG1		1	1	60	0.017	No
JUP		1	1	60	0.017	No
FUCA1		1	1	60	0.017	No
MTERF4		1	1	60	0.017	No
FN1		1	1	60	0.017	No
EIF2AK2		1	1	60	0.017	No
IGHV3-16		1	1	60	0.017	No
PBX4		1	1	60	0.017	No
ZNF34		1	1	60	0.017	No
L1CAM		1	1	60	0.017	No
STRC		1	1	60	0.017	No
ZNF30		1	1	60	0.017	No
F13B		1	1	60	0.017	No
RNF220		1	1	60	0.017	No
MTMR10		1	1	60	0.017	No
ZNF493		1	1	60	0.017	No
KCNC4		1	1	60	0.017	No
KDM8		1	1	60	0.017	No
SNX13		1	1	60	0.017	No
ZNF44		1	1	60	0.017	No
TFCP2L1		1	1	60	0.017	No
ARHGAP5		1	1	60	0.017	No
SHB		1	1	60	0.017	No
MED12		1	1	60	0.017	Yes
GGTLC2		1	1	60	0.017	No
CHAF1A		1	1	60	0.017	No
BMERB1		1	1	60	0.017	No
JAK3		1	1	60	0.017	Yes
MYBPC3		1	1	60	0.017	No
CHST8		1	1	60	0.017	No
MYBPC1		1	1	60	0.017	No
ZNF483		1	1	60	0.017	No
MYBPC2		1	1	60	0.017	No
DUSP1		1	1	60	0.017	No
KCND3		1	1	60	0.017	No
SLC39A11		1	1	60	0.017	No
TEX14		1	1	60	0.017	No
DUSP8		1	1	60	0.017	No
GMIP		1	1	60	0.017	No
SLC39A14		1	1	60	0.017	No
PGM2L1		1	1	60	0.017	No
MMP11		1	1	60	0.017	No
SLC7A5		1	1	60	0.017	No
SLC7A8		1	1	60	0.017	No
CYP21A2		1	1	60	0.017	No
DPYD		1	1	60	0.017	Yes
AGPS		1	1	60	0.017	No
CRYAA		1	1	60	0.017	No
ACSBG2		1	1	60	0.017	No
CACUL1		1	1	60	0.017	No
CHST2		1	1	60	0.017	No
PAFAH1B1		1	1	60	0.017	No
ELOF1		1	1	60	0.017	No
ATL3		1	1	60	0.017	No
GSTP1		1	1	60	0.017	No
KCNA1		1	1	60	0.017	No
FAXC		1	1	60	0.017	No
SYNPO2		1	1	60	0.017	No
WNT8A		1	1	60	0.017	No
KCNA4		1	1	60	0.017	No
KCNA6		1	1	60	0.017	No
SNX31		1	1	60	0.017	No
SLC7A3		1	1	60	0.017	No
NRAS	0.0317	1	1	60	0.017	Yes
SNX29		1	1	60	0.017	Yes
EXOSC10		1	1	60	0.017	No
ADAM23		1	1	60	0.017	No
ZSWIM8		1	1	60	0.017	No
PLAGL2		1	1	60	0.017	No
STX2		1	1	60	0.017	No
IL12RB1		1	1	60	0.017	No
ZNF467		1	1	60	0.017	No
JAM2		1	1	60	0.017	No
MBD4		1	1	60	0.017	Yes
MBD5		1	1	60	0.017	No
CRBN		1	1	60	0.017	Yes
ATAD5		1	1	60	0.017	No
GOLM2		1	1	60	0.017	No
KCNB1		1	1	60	0.017	No
MCRS1		1	1	60	0.017	No
ADAM33		1	1	60	0.017	No
APEX2		1	1	60	0.017	No
PASD1		1	1	60	0.017	No
KIR3DL3		1	1	60	0.017	No
TARBP1		1	1	60	0.017	No
DCBLD2		1	1	60	0.017	No
CENPF		1	1	60	0.017	No
COL3A1		2	1	60	0.017	No
ZNF71		1	1	60	0.017	No
SLMAP		1	1	60	0.017	No
TSR2		1	1	60	0.017	No
OCM		1	1	60	0.017	No
PWWP3B		1	1	60	0.017	No
SIGLEC1		1	1	60	0.017	No
SIGLEC8		1	1	60	0.017	No
CRLF3		1	1	60	0.017	No
SIGLEC6		1	1	60	0.017	No
ADGRL2		1	1	60	0.017	No
LIMS1		1	1	60	0.017	No
SIGLEC5		1	1	60	0.017	No
GZF1		1	1	60	0.017	No
YPEL2		1	1	60	0.017	No
ZNF451		1	1	60	0.017	No
MPV17L		1	1	60	0.017	No
FBXO24		1	1	60	0.017	No
ATP12A		1	1	60	0.017	No
MFSD13A		1	1	60	0.017	No
POFUT2		1	1	60	0.017	No
SLK		1	1	60	0.017	No
FNTA		1	1	60	0.017	No
GARIN3		1	1	60	0.017	No
POTEJ		1	1	60	0.017	No
GARIN2		1	1	60	0.017	No
ZNF449		1	1	60	0.017	No
TNFRSF8		1	1	60	0.017	No
POTEF		1	1	60	0.017	No
MAP3K5		1	1	60	0.017	No
PSKH1		1	1	60	0.017	No
KCNH2		1	1	60	0.017	No
ZNF440		1	1	60	0.017	No
KCNH4		1	1	60	0.017	No
KCNH8		1	1	60	0.017	No
UGT2B15		1	1	60	0.017	No
FBXO17		1	1	60	0.017	No
FBXO15		1	1	60	0.017	No
ATP11C		2	1	60	0.017	No
ATP11A		1	1	60	0.017	No
MSH6		1	1	60	0.017	Yes
TPST2		1	1	60	0.017	No
NPAS4		1	1	60	0.017	No
MSH2		1	1	60	0.017	Yes
DMTF1		1	1	60	0.017	No
SMS		1	1	60	0.017	No
OR9A2		1	1	60	0.017	No
ZNF438		1	1	60	0.017	No
SLC27A4		1	1	60	0.017	No
FTO		1	1	60	0.017	No
KMT2D		1	1	60	0.017	Yes
KHDRBS1		1	1	60	0.017	No
BLM		1	1	60	0.017	Yes
DLX2		1	1	60	0.017	No
KCNE1		1	1	60	0.017	No
KHDRBS2		1	1	60	0.017	No
SHC3		1	1	60	0.017	No
SHC1		1	1	60	0.017	No
KMT2C		1	1	60	0.017	Yes
BOD1L1		1	1	60	0.017	No
FBXO47		1	1	60	0.017	No
CREBL2		1	1	60	0.017	No
CORO1C		1	1	60	0.017	No
IGSF21		1	1	60	0.017	No
LOXHD1		1	1	60	0.017	No
AMDHD1		1	1	60	0.017	No
G3BP1		1	1	60	0.017	No
ZKSCAN2		1	1	60	0.017	No
TNFRSF14		1	1	60	0.017	Yes
KHDC4		1	1	60	0.017	No
BMF		1	1	60	0.017	No
KDSR		1	1	60	0.017	Yes
SMYD3		1	1	60	0.017	Yes
GRIA4		1	1	60	0.017	No
SLC14A1		1	1	60	0.017	No
ODF2		1	1	60	0.017	No
NRDC		1	1	60	0.017	No
HPS4		1	1	60	0.017	No
ARPC4		1	1	60	0.017	No
CTAG2		1	1	60	0.017	No
NHSL3		1	1	60	0.017	No
TMPRSS15		1	1	60	0.017	No
FAM90A1		1	1	60	0.017	No
G6PC2		1	1	60	0.017	No
NACA		1	1	60	0.017	Yes
SP1		1	1	60	0.017	No
DMXL1		1	1	60	0.017	No
DMXL2		1	1	60	0.017	No
ADSS1		1	1	60	0.017	No
OSBPL1A		1	1	60	0.017	No
TRIM77		1	1	60	0.017	No
POM121L12		1	1	60	0.017	No
TRIM71		1	1	60	0.017	No
BMP10		1	1	60	0.017	No
PIWIL4		1	1	60	0.017	No
PIWIL3		1	1	60	0.017	No
ITGB4		1	1	60	0.017	No
MTCL1		1	1	60	0.017	No
HTR2B		1	1	60	0.017	No
ECE2		1	1	60	0.017	No
ITGAL		1	1	60	0.017	No
RESF1		1	1	60	0.017	No
UNC80		1	1	60	0.017	No
PPP6R1		1	1	60	0.017	No
ZNF408		1	1	60	0.017	No
DDI1		1	1	60	0.017	No
TRIM69		1	1	60	0.017	No
ZNF404		1	1	60	0.017	No
SPX		1	1	60	0.017	No
SMIM10		1	1	60	0.017	No
CEP290		1	1	60	0.017	No
TRIM67		1	1	60	0.017	No
VPS13D		1	1	60	0.017	No
NRG2		1	1	60	0.017	No
ADAMTS20		1	1	60	0.017	No
MFRP		1	1	60	0.017	No
APRG1		1	1	60	0.017	No
MYO3A		1	1	60	0.017	No
LCOR		1	1	60	0.017	No
ITGA6		1	1	60	0.017	No
YJU2B		1	1	60	0.017	No
PRKAA1		1	1	60	0.017	No
TRIM51		1	1	60	0.017	No
TRIM52		1	1	60	0.017	No
C1S		1	1	60	0.017	No
ACCSL		1	1	60	0.017	No
U2AF1		1	1	60	0.017	Yes
SRR		1	1	60	0.017	No
ZNRF3		1	1	60	0.017	Yes
PHKG1		1	1	60	0.017	No
AWAT2		1	1	60	0.017	No
TRIM46		1	1	60	0.017	No
E2F2		1	1	60	0.017	No
E2F4		1	1	60	0.017	No
TRIM49		1	1	60	0.017	No
WHAMM		1	1	60	0.017	No
HNRNPA1		1	1	60	0.017	No
TSPOAP1		2	1	60	0.017	No
SLC36A4		1	1	60	0.017	No
KCNJ3		1	1	60	0.017	No
KCNJ4		1	1	60	0.017	No
KCNJ5		1	1	60	0.017	Yes
NTRK2		1	1	60	0.017	Yes
H2AZ2		1	1	60	0.017	No
COL26A1		1	1	60	0.017	No
PCDH9		1	1	60	0.017	No
KCNJ9		1	1	60	0.017	No
GZMA		1	1	60	0.017	No
NTRK3		1	1	60	0.017	Yes
SYT16		1	1	60	0.017	No
SORL1		1	1	60	0.017	No
TBX3		1	1	60	0.017	Yes
BICC1		1	1	60	0.017	No
DYTN		1	1	60	0.017	No
MYO1D		1	1	60	0.017	No
MFSD14B		1	1	60	0.017	No
OR51V1		1	1	60	0.017	No
SYT12		1	1	60	0.017	No
TSPAN19		1	1	60	0.017	No
OCIAD1		1	1	60	0.017	No
PDCD2		1	1	60	0.017	No
PDCD1		1	1	60	0.017	Yes
MYO1H		1	1	60	0.017	No
ZNF852		1	1	60	0.017	No
UNC79		1	1	60	0.017	No
KCNK4		1	1	60	0.017	No
ODAD1		1	1	60	0.017	No
CPNE9		1	1	60	0.017	No
CPNE8		1	1	60	0.017	No
NPFFR1		1	1	60	0.017	No
CERK		1	1	60	0.017	No
ECI2		1	1	60	0.017	No
LCTL		1	1	60	0.017	No
CCDC102A		1	1	60	0.017	No
IGLV8-61		1	1	60	0.017	No
STS		1	1	60	0.017	No
TRIM28		1	1	60	0.017	No
ADGRA1		1	1	60	0.017	No
ANPEP		1	1	60	0.017	No
PIEZO2		1	1	60	0.017	No
ARL16		1	1	60	0.017	No
CPNE2		1	1	60	0.017	No
THSD7A		1	1	60	0.017	No
ATP6V1E1		1	1	60	0.017	No
MFSD2A		1	1	60	0.017	No
ALG8		1	1	60	0.017	No
ACTN2		1	1	60	0.017	No
ACTN1		1	1	60	0.017	No
BSX		1	1	60	0.017	No
MYO7B		1	1	60	0.017	No
ISLR2		1	1	60	0.017	No
CFAP141		1	1	60	0.017	No
KEL		1	1	60	0.017	Yes
GAREM1		1	1	60	0.017	No
CRISPLD1		1	1	60	0.017	No
ADGRB3		1	1	60	0.017	No
ADGRB1		1	1	60	0.017	No
KCNQ2		1	1	60	0.017	No
CD226		1	1	60	0.017	No
KCTD17		1	1	60	0.017	No
CES3		1	1	60	0.017	No
CCDC82		1	1	60	0.017	No
KCTD18		1	1	60	0.017	No
OR5A1		1	1	60	0.017	No
CCDC83		1	1	60	0.017	No
GRB7		1	1	60	0.017	Yes
TMEM63C		1	1	60	0.017	No
SPMIP7		1	1	60	0.017	No
BRIP1		1	1	60	0.017	Yes
SEC14L1		1	1	60	0.017	No
HLTF		1	1	60	0.017	No
SEC14L5		1	1	60	0.017	No
KCNN1		1	1	60	0.017	No
KCNN2		1	1	60	0.017	No
KCNN3		1	1	60	0.017	No
H3C2		1	1	60	0.017	Yes
B4GALNT3		1	1	60	0.017	No
H3C4		1	1	60	0.017	Yes
DECR1		1	1	60	0.017	No
SLC10A5		1	1	60	0.017	No
EGR3		1	1	60	0.017	No
REG4		1	1	60	0.017	No
MYO5A		1	1	60	0.017	Yes
DELE1		1	1	60	0.017	No
SUCO		1	1	60	0.017	No
NBEAL2		1	1	60	0.017	No
CPLANE1		1	1	60	0.017	No
SMARCA2		1	1	60	0.017	Yes
FER1L6		1	1	60	0.017	No
SMARCA4		1	1	60	0.017	Yes
MED13L		1	1	60	0.017	No
CYP26A1		1	1	60	0.017	No
PEX5L		1	1	60	0.017	No
LPAR6		1	1	60	0.017	No
NDUFAF4		1	1	60	0.017	No
IGSF9B		1	1	60	0.017	No
DDR1		1	1	60	0.017	Yes
COX7B		1	1	60	0.017	No
NRP2		1	1	60	0.017	No
IL24		1	1	60	0.017	No
ICA1		1	1	60	0.017	No
AP4E1		1	1	60	0.017	No
OTUD7B		1	1	60	0.017	No
GRIK2		1	1	60	0.017	No
ZNF321P		1	1	60	0.017	No
SYNCRIP		1	1	60	0.017	No
ACTR1A		1	1	60	0.017	No
ACTR1B		1	1	60	0.017	No
CNTRL		1	1	60	0.017	Yes
CHAMP1		1	1	60	0.017	No
FCER1A		1	1	60	0.017	No
RAC1		1	1	60	0.017	Yes
SPTAN1		1	1	60	0.017	No
GIT1		1	1	60	0.017	No
ZHX2		1	1	60	0.017	No
SFTPD		1	1	60	0.017	No
MRPS23		1	1	60	0.017	No
PABPC5		1	1	60	0.017	No
PRPF40B		1	1	60	0.017	No
SYN2		1	1	60	0.017	No
GAB4		1	1	60	0.017	No
SREBF2		1	1	60	0.017	No
TOX3		1	1	60	0.017	No
RNF144B		1	1	60	0.017	No
KCNU1		1	1	60	0.017	No
KIT		1	1	60	0.017	Yes
TAX1BP1		1	1	60	0.017	No
IGHE		1	1	60	0.017	No
DDR2		1	1	60	0.017	Yes
ARHGEF6		1	1	60	0.017	No
CAB39		1	1	60	0.017	No
MRPS34		1	1	60	0.017	No
GPALPP1		1	1	60	0.017	No
RELA		1	1	60	0.017	No
PRICKLE4		1	1	60	0.017	No
ZFP14		1	1	60	0.017	No
RELN		1	1	60	0.017	Yes
OS9		1	1	60	0.017	No
PDZD11		1	1	60	0.017	No
ORMDL3		1	1	60	0.017	No
EPS15		1	1	60	0.017	Yes
RAE1		1	1	60	0.017	No
ZNF585A		1	1	60	0.017	No
H2BC9		2	1	60	0.017	No
PEX19		1	1	60	0.017	No
PCDHB15		1	1	60	0.017	No
OR51M1		1	1	60	0.017	No
PCDHB12		1	1	60	0.017	No
SGSM1		1	1	60	0.017	No
SH3RF3		1	1	60	0.017	No
CFHR2		1	1	60	0.017	No
SEMG2		1	1	60	0.017	No
FHIP2A		1	1	60	0.017	No
KCNS2		1	1	60	0.017	No
CFHR4		1	1	60	0.017	No
TTC3		1	1	60	0.017	No
PCDHB16		1	1	60	0.017	No
CFAP161		1	1	60	0.017	No
KIAA1958		1	1	60	0.017	No
MAMLD1		1	1	60	0.017	No
NEK11		1	1	60	0.017	No
PRDM7		1	1	60	0.017	No
CRTC3		1	1	60	0.017	Yes
AMHR2		1	1	60	0.017	No
PRDM6		2	1	60	0.017	No
ZFAND5		1	1	60	0.017	No
INPPL1		1	1	60	0.017	Yes
BUB1B		1	1	60	0.017	Yes
LOXL4		1	1	60	0.017	No
PRDM1		1	1	60	0.017	Yes
UBE3B		1	1	60	0.017	No
COX6A1		1	1	60	0.017	No
CELSR1		1	1	60	0.017	No
ETS2		1	1	60	0.017	No
DMBT1		1	1	60	0.017	No
GNPTAB		1	1	60	0.017	No
PPIP5K2		1	1	60	0.017	No
TBC1D32		1	1	60	0.017	No
DENND5A		1	1	60	0.017	No
ENPP3		1	1	60	0.017	No
RAG1		1	1	60	0.017	No
CARD10		1	1	60	0.017	No
FBXW10		1	1	60	0.017	No
RADX		1	1	60	0.017	No
TMOD2		1	1	60	0.017	No
IRAG1		1	1	60	0.017	No
UBE4A		1	1	60	0.017	No
CDKAL1		1	1	60	0.017	No
KMO		1	1	60	0.017	No
DHDDS		1	1	60	0.017	No
SPOCD1		1	1	60	0.017	No
ADAM15		1	1	60	0.017	No
MAP7D1		1	1	60	0.017	No
ADAM12		1	1	60	0.017	No
FETUB		1	1	60	0.017	No
BBOF1		1	1	60	0.017	No
FBN2		1	1	60	0.017	No
OR1A1		1	1	60	0.017	No
DDX5		1	1	60	0.017	Yes
COX15		1	1	60	0.017	No
UBA6		1	1	60	0.017	No
HTRA3		1	1	60	0.017	No
CACNA1B		1	1	60	0.017	No
HTRA1		1	1	60	0.017	No
PLD5		1	1	60	0.017	No
CACNA1A		1	1	60	0.017	No
CACNA1D		1	1	60	0.017	Yes
CACNA1H		1	1	60	0.017	No
PLD3		1	1	60	0.017	No
PLD2		1	1	60	0.017	No
CACNA1G		1	1	60	0.017	No
TIMM50		1	1	60	0.017	No
ADGRG3		1	1	60	0.017	No
CNN1		1	1	60	0.017	No
RAI1		1	1	60	0.017	No
GRK3		1	1	60	0.017	No
RNASEH1		1	1	60	0.017	No
OR2AK2		1	1	60	0.017	No
IRAK1		1	1	60	0.017	No
TMEM247		1	1	60	0.017	No
SNTG1		1	1	60	0.017	No
CACNA1S		1	1	60	0.017	No
PIBF1		1	1	60	0.017	No
COX10		1	1	60	0.017	No
EEFSEC		1	1	60	0.017	No
TFAP2B		1	1	60	0.017	No
SYT3		1	1	60	0.017	No
VCAM1		1	1	60	0.017	No
SYT1		1	1	60	0.017	No
DENND4B		1	1	60	0.017	No
OTUD6A		1	1	60	0.017	No
TLX1NB		1	1	60	0.017	No
BLTP1		1	1	60	0.017	No
GGN		1	1	60	0.017	No
UEVLD		1	1	60	0.017	No
FAM151B		1	1	60	0.017	No
GNB2		1	1	60	0.017	No
UVSSA		1	1	60	0.017	No
MKRN1		1	1	60	0.017	No
NABP2		1	1	60	0.017	No
UBA1		1	1	60	0.017	Yes
AMOTL2		1	1	60	0.017	No
CNTN4		1	1	60	0.017	No
MUC20		1	1	60	0.017	No
SDK2		1	1	60	0.017	No
DNAL1		1	1	60	0.017	No
DYRK4		1	1	60	0.017	No
MS4A3		1	1	60	0.017	No
PLEK		1	1	60	0.017	No
HP1BP3		1	1	60	0.017	No
CYP4A22		1	1	60	0.017	No
TCHH		1	1	60	0.017	No
PITPNC1		1	1	60	0.017	No
GRM3		1	1	60	0.017	Yes
UFL1		1	1	60	0.017	No
IFT52		1	1	60	0.017	No
TMEM222		1	1	60	0.017	No
GRM5		1	1	60	0.017	No
ADGRE5		1	1	60	0.017	No
GRM7		1	1	60	0.017	No
MAN1A2		1	1	60	0.017	No
GRM8		1	1	60	0.017	No
MYO18B		1	1	60	0.017	No
MAN1A1		1	1	60	0.017	No
DACT1		1	1	60	0.017	No
REDIC1		1	1	60	0.017	No
SUN2		1	1	60	0.017	No
OR51G1		1	1	60	0.017	No
MYOCD		1	1	60	0.017	No
PDPK1		1	1	60	0.017	Yes
SHROOM2		1	1	60	0.017	No
NAV2		1	1	60	0.017	No
EEF1G		1	1	60	0.017	No
ETV7		1	1	60	0.017	No
TMEM212		1	1	60	0.017	No
TMEM213		1	1	60	0.017	No
SETBP1		1	1	60	0.017	Yes
GFOD1		1	1	60	0.017	No
ELF4		1	1	60	0.017	Yes
ELF5		1	1	60	0.017	No
OR2B11		1	1	60	0.017	No
MS4A2		1	1	60	0.017	No
SHANK2		1	1	60	0.017	No
CLRN1		1	1	60	0.017	No
OR5M9		1	1	60	0.017	No
DNAH1		1	1	60	0.017	No
DNAH2		1	1	60	0.017	No
DNAH8		1	1	60	0.017	No
ASB13		1	1	60	0.017	No
ASB14		1	1	60	0.017	No
DNAH9		1	1	60	0.017	No
ASB12		1	1	60	0.017	No
PKD1L3		1	1	60	0.017	No
CBL		1	1	60	0.017	Yes
CRYZ		1	1	60	0.017	No
C4ORF33		1	1	60	0.017	No
POLD3		1	1	60	0.017	No
CAND2		1	1	60	0.017	No
SV2C		1	1	60	0.017	No
SV2B		1	1	60	0.017	No
POLD1		1	1	60	0.017	Yes
TGS1		1	1	60	0.017	No
MKNK2		1	1	60	0.017	No
SPOCK3		1	1	60	0.017	No
BNIP2		1	1	60	0.017	No
MTA3		1	1	60	0.017	No
SPATA31E1		1	1	60	0.017	No
ARFGEF2		1	1	60	0.017	No
EYA2		1	1	60	0.017	No
OR51E2		1	1	60	0.017	No
ZNF804B		1	1	60	0.017	No
TBX18		1	1	60	0.017	No
TTC17		1	1	60	0.017	No
POLE4		1	1	60	0.017	No
ADGRD1		1	1	60	0.017	No
MYO15A		1	1	60	0.017	No
COL7A1		1	1	60	0.017	No
TBX10		1	1	60	0.017	No
ERCC2		1	1	60	0.017	Yes
ACKR4		1	1	60	0.017	No
ACKR3		1	1	60	0.017	Yes
ERCC6		1	1	60	0.017	No
GLA		1	1	60	0.017	No
PRSS1		1	1	60	0.017	Yes
IPO11		1	1	60	0.017	No
RNH1		1	1	60	0.017	No
ADARB1		1	1	60	0.017	No
SLC4A4		1	1	60	0.017	No
EPS8		1	1	60	0.017	No
NYNRIN		1	1	60	0.017	No
CNST		1	1	60	0.017	No
SCN11A		1	1	60	0.017	No
VPS35		1	1	60	0.017	No
PROK1		1	1	60	0.017	No
C2ORF81		1	1	60	0.017	No
NUP214		1	1	60	0.017	Yes
RSPH6A		1	1	60	0.017	No
NUP210		1	1	60	0.017	No
TAAR8		1	1	60	0.017	No
PRKCB		1	1	60	0.017	Yes
DDX11		1	1	60	0.017	No
DNAAF1		1	1	60	0.017	No
DNAAF5		1	1	60	0.017	No
WDR72		1	1	60	0.017	No
CEL		1	1	60	0.017	No
NUP93		1	1	60	0.017	Yes
SCN10A		1	1	60	0.017	No
ARMC6		1	1	60	0.017	No
HECW1		1	1	60	0.017	No
PRKCQ		1	1	60	0.017	No
CTBP2		1	1	60	0.017	No
CFH		1	1	60	0.017	No
PRKDC		1	1	60	0.017	Yes
XPA		1	1	60	0.017	Yes
PRDM15		1	1	60	0.017	No
WDR64		1	1	60	0.017	No
RNPC3		1	1	60	0.017	No
GNS		1	1	60	0.017	No
SAMSN1		1	1	60	0.017	No
ACMSD		1	1	60	0.017	No
LDHC		1	1	60	0.017	No
OR5M11		1	1	60	0.017	No
PLAC9		1	1	60	0.017	No
PRDM16		1	1	60	0.017	Yes
VPS11		1	1	60	0.017	No
ST3GAL5		1	1	60	0.017	No
PCDHA4		1	1	60	0.017	No
PCDHA3		1	1	60	0.017	No
PCDHA7		1	1	60	0.017	No
KAT14		1	1	60	0.017	No
PLK3		1	1	60	0.017	No
SMCP		1	1	60	0.017	No
ZNF384		1	1	60	0.017	Yes
HOMER1		1	1	60	0.017	No
APOOL		1	1	60	0.017	No
POU6F2		1	1	60	0.017	No
NFATC2		1	1	60	0.017	Yes
RMDN3		1	1	60	0.017	No
MEX3C		1	1	60	0.017	No
PHC3		1	1	60	0.017	No
HNRNPL		1	1	60	0.017	No
EHD2		1	1	60	0.017	No
TCN2		1	1	60	0.017	No
PCDHB2		1	1	60	0.017	No
PCDHB1		1	1	60	0.017	No
HNRNPF		1	1	60	0.017	No
HNRNPD		1	1	60	0.017	No
ATG2A		1	1	60	0.017	No
PCDHB3		1	1	60	0.017	No
ATG2B		1	1	60	0.017	No
SETD5		1	1	60	0.017	Yes
SMG1		1	1	60	0.017	Yes
SETD2		1	1	60	0.017	Yes
GMEB2		1	1	60	0.017	No
ARPC1B		1	1	60	0.017	No
ASH2L		1	1	60	0.017	No
WDR45		1	1	60	0.017	No
KRI1		1	1	60	0.017	No
VSIG10		1	1	60	0.017	No
ASGR2		1	1	60	0.017	No
FARS2		1	1	60	0.017	No
PHF8		1	1	60	0.017	No
SMG6		1	1	60	0.017	No
C1QTNF3		1	1	60	0.017	No
ADAMTSL3		1	1	60	0.017	No
ZNF280C		1	1	60	0.017	No
CIC		1	1	60	0.017	Yes
ZNF365		1	1	60	0.017	No
GNL1		1	1	60	0.017	No
TERF2		1	1	60	0.017	No
CIT		1	1	60	0.017	No
GNL3		1	1	60	0.017	No
WDR33		1	1	60	0.017	No
FAM210B		1	1	60	0.017	No
HADHA		2	1	60	0.017	No
KAT2A		1	1	60	0.017	No
NSA2		1	1	60	0.017	No
HEATR5B		1	1	60	0.017	No
MTF1		1	1	60	0.017	No
GAS2		1	1	60	0.017	No
ANGPTL2		1	1	60	0.017	No
AHRR		1	1	60	0.017	No
PLEKHO1		1	1	60	0.017	No
PLEKHO2		1	1	60	0.017	No
PLIN5		1	1	60	0.017	No
GRAMD1C		1	1	60	0.017	No
METTL21A		1	1	60	0.017	No
FGD1		1	1	60	0.017	No
SCAF8		1	1	60	0.017	No
FGD6		1	1	60	0.017	No
NSD1		1	1	60	0.017	Yes
GPAT2		1	1	60	0.017	No
TAF9B		1	1	60	0.017	No
ZNF343		1	1	60	0.017	No
GSN		1	1	60	0.017	No
YTHDF2		1	1	60	0.017	No
CKM		1	1	60	0.017	No
GABRA6		1	1	60	0.017	Yes
MCF2		1	1	60	0.017	No
GABRA3		1	1	60	0.017	No
GSR		1	1	60	0.017	No
ECEL1		1	1	60	0.017	No
MOCOS		1	1	60	0.017	No
ELP1		1	1	60	0.017	No
SYVN1		1	1	60	0.017	No
RFLNB		1	1	60	0.017	No
GATB		1	1	60	0.017	No
RRP1B		1	1	60	0.017	No
ELP6		1	1	60	0.017	No
HIPK2		1	1	60	0.017	No
ZNF337		1	1	60	0.017	No
PLP2		1	1	60	0.017	No
COQ8A		1	1	60	0.017	No
ZNF334		1	1	60	0.017	No
CEP126		1	1	60	0.017	No
GTF2B		1	1	60	0.017	No
RPL10L		1	1	60	0.017	No
IL5RA		1	1	60	0.017	No
TM7SF3		1	1	60	0.017	No
IPO7		1	1	60	0.017	No
VIRMA		1	1	60	0.017	No
SLC8A1		1	1	60	0.017	No
IPO4		1	1	60	0.017	No
CEP128		1	1	60	0.017	No
HID1		1	1	60	0.017	No
FGF5		1	1	60	0.017	Yes
EDC4		1	1	60	0.017	No
LAMP5		1	1	60	0.017	No
RIMS1		1	1	60	0.017	No
IPO9		1	1	60	0.017	No
SALL3		1	1	60	0.017	No
SALL4		1	1	60	0.017	Yes
PLXNC1		1	1	60	0.017	No
MB21D2		1	1	60	0.017	No
PLEKHJ1		1	1	60	0.017	No
PCDHAC1		2	1	60	0.017	No
KCMF1		1	1	60	0.017	No
MAP2K2		1	1	60	0.017	Yes
USP6		1	1	60	0.017	Yes
COL27A1		1	1	60	0.017	No
USP4		1	1	60	0.017	No
DYRK1A	0.0402	1	1	60	0.017	No
VRK2		1	1	60	0.017	No
FRMD4B		1	1	60	0.017	No
FAM91A1		1	1	60	0.017	No
HIC2		1	1	60	0.017	No
LBHD1		1	1	60	0.017	No
RAB30		1	1	60	0.017	No
KAT6B		1	1	60	0.017	Yes
KAT6A		2	1	60	0.017	Yes
H4C13		1	1	60	0.017	No
ZNF799		1	1	60	0.017	No
ZNF792		1	1	60	0.017	No
CBFB		1	1	60	0.017	Yes
UBR2		1	1	60	0.017	No
YBEY		1	1	60	0.017	No
TTC21B		1	1	60	0.017	No
TPR		1	1	60	0.017	Yes
PLXNA2		1	1	60	0.017	No
PLXNA1		1	1	60	0.017	No
CCDC32		2	1	60	0.017	No
SRGAP2		1	1	60	0.017	No
ZNF786		1	1	60	0.017	No
AP1M2		1	1	60	0.017	No
OSBPL7		1	1	60	0.017	No
CCDC18		1	1	60	0.017	No
AMBN		1	1	60	0.017	No
TMEM132B		1	1	60	0.017	No
PXDNL		1	1	60	0.017	No
LRFN2		1	1	60	0.017	No
CNIH1		1	1	60	0.017	No
LRFN4		1	1	60	0.017	No
SYNJ1		1	1	60	0.017	No
LHX2		1	1	60	0.017	No
MAP3K19		1	1	60	0.017	No
PLXNB3		1	1	60	0.017	No
PIR		1	1	60	0.017	No
PLXNB2		1	1	60	0.017	No
PLXNB1		1	1	60	0.017	No
ZNF777		1	1	60	0.017	No
ZNF774		1	1	60	0.017	No
DIDO1		1	1	60	0.017	No
COL14A1		1	1	60	0.017	No
ZC3H4		1	1	60	0.017	No
WDR3		1	1	60	0.017	No
ZC3H6		1	1	60	0.017	No
SYNE2		1	1	60	0.017	No
ADAMTS5		1	1	60	0.017	No
PSTPIP2		1	1	60	0.017	No
SCRN2		1	1	60	0.017	No
EMILIN3		1	1	60	0.017	No
PHACTR3		1	1	60	0.017	No
PRKG2		1	1	60	0.017	No
TLK1		1	1	60	0.017	No
EMILIN2		1	1	60	0.017	No
OR8D2		1	1	60	0.017	No
PLEKHG1		1	1	60	0.017	No
CR1		1	1	60	0.017	No
KRTAP5-8		1	1	60	0.017	No
CDADC1		1	1	60	0.017	No
RFC1		1	1	60	0.017	No
CTDSPL		1	1	60	0.017	No
COBL		1	1	60	0.017	No
APOA5		1	1	60	0.017	No
C1QL3		1	1	60	0.017	No
TSN		1	1	60	0.017	No
KRTAP19-8		1	1	60	0.017	No
TFDP2		1	1	60	0.017	No
NOA1		1	1	60	0.017	No
POLR1B		1	1	60	0.017	No
MCM4		1	1	60	0.017	No
LCT		1	1	60	0.017	No
NSRP1		1	1	60	0.017	No
FOXD4L1		1	1	60	0.017	No
NUFIP2		1	1	60	0.017	No
OR6C65		1	1	60	0.017	No
CATSPER4		1	1	60	0.017	No
CRX		1	1	60	0.017	No
PLG		1	1	60	0.017	No
NLRC4		1	1	60	0.017	No
HDAC6		1	1	60	0.017	No
THSD4		1	1	60	0.017	No
HDAC7		1	1	60	0.017	Yes
DNAJB2		1	1	60	0.017	No
STOX2		1	1	60	0.017	No
HECTD1		1	1	60	0.017	No
ABLIM2		1	1	60	0.017	No
POLR2B		1	1	60	0.017	No
HAUS7		1	1	60	0.017	No
ZNF749		1	1	60	0.017	No
OR8B2		1	1	60	0.017	No
POLR2J		1	1	60	0.017	No
ANGPT2		1	1	60	0.017	No
TRPA1		1	1	60	0.017	No
FBXL19		1	1	60	0.017	No
MTOR		1	1	60	0.017	Yes
FBXL12		2	1	60	0.017	No
OTOGL		1	1	60	0.017	No
EVI2A		1	1	60	0.017	No
DNAJA4		1	1	60	0.017	No
GLOD4		1	1	60	0.017	No
ZNF737		1	1	60	0.017	No
MAB21L2		1	1	60	0.017	No
ASXL2		1	1	60	0.017	Yes
CCDC63		1	1	60	0.017	No
CEP162		1	1	60	0.017	No
TLL1		1	1	60	0.017	No
VPS45		1	1	60	0.017	No
PPIL4		1	1	60	0.017	No
CCDC60		1	1	60	0.017	No
NECTIN1		1	1	60	0.017	No
DYNC2I2		1	1	60	0.017	No
TCERG1		1	1	60	0.017	No
DYNC2I1		1	1	60	0.017	No
VEZT		1	1	60	0.017	No
CALML6		1	1	60	0.017	No
DCAF4L2		1	1	60	0.017	No
OR52N4		1	1	60	0.017	No
FERD3L		1	1	60	0.017	No
OR52N2		1	1	60	0.017	No
FLAD1		1	1	60	0.017	No
DZIP1L		1	1	60	0.017	No
PDK3		1	1	60	0.017	No
LONP2		1	1	60	0.017	No
HMCN1		1	1	60	0.017	No
SYNPO		1	1	60	0.017	No
ZNF841		1	1	60	0.017	No
SRRM4		1	1	60	0.017	No
SRRM5		1	1	60	0.017	No
COG4		1	1	60	0.017	No
IFRD1		1	1	60	0.017	No
DLEC1		1	1	60	0.017	No
P3H4		1	1	60	0.017	No
KRT5		1	1	60	0.017	No
ESCO2		1	1	60	0.017	Yes
CRNKL1		1	1	60	0.017	No
TIAM2		1	1	60	0.017	No
ZNF835		1	1	60	0.017	No
GSAP		1	1	60	0.017	No
SIK1		1	1	60	0.017	No
TLN2		1	1	60	0.017	No
ZNF831		1	1	60	0.017	No
IGKV2D-26		1	1	60	0.017	No
CFTR		1	1	60	0.017	No
SLC22A3		1	1	60	0.017	No
SPTBN4		1	1	60	0.017	No
SPTBN5		1	1	60	0.017	No
CASZ1		1	1	60	0.017	No
STXBP3		1	1	60	0.017	No
KRTAP10-10		1	1	60	0.017	No
STXBP2		1	1	60	0.017	No
FUT11		1	1	60	0.017	No
SLC26A10P		1	1	60	0.017	No
RPAP1		1	1	60	0.017	No
CBARP		1	1	60	0.017	No
FXR1		1	1	60	0.017	No
HELZ2		1	1	60	0.017	No
TRPM2		1	1	60	0.017	No
UGCG		1	1	60	0.017	No
CFAP251		1	1	60	0.017	No
SCFD1		1	1	60	0.017	No
ZNF829		1	1	60	0.017	No
PDCD11		1	1	60	0.017	Yes
ZNF823		1	1	60	0.017	No
MAGEC2		1	1	60	0.017	No
TRPM3		1	1	60	0.017	No
H4C7		1	1	60	0.017	No
SYNRG		1	1	60	0.017	No
SETDB2		1	1	60	0.017	Yes
PARVB		1	1	60	0.017	No
TYR		1	1	60	0.017	No
PUM3		1	1	60	0.017	No
RPS28		1	1	60	0.017	No
CABYR		1	1	60	0.017	No
PARVG		1	1	60	0.017	No
RPS29		1	1	60	0.017	No
CCSER2		1	1	60	0.017	No
CCSER1		1	1	60	0.017	No
DCP1A		1	1	60	0.017	No
TOP6BL		1	1	60	0.017	No
ROBO2		1	1	60	0.017	No
SLC44A5		1	1	60	0.017	No
COL18A1		1	1	60	0.017	No
ORM1		1	1	60	0.017	No
C2CD5		1	1	60	0.017	No
SLC35F5		1	1	60	0.017	No
PRL		1	1	60	0.017	No
MAGT1		1	1	60	0.017	No
MEOX2		1	1	60	0.017	No
SIPA1L2		1	1	60	0.017	No
SH3PXD2A		1	1	60	0.017	No
SLC22A16		1	1	60	0.017	No
XPO5		1	1	60	0.017	No
TINAG		1	1	60	0.017	No
GABPA		1	1	60	0.017	No
PSD		1	1	60	0.017	No
TMED8		1	1	60	0.017	No
KRTAP9-1		1	1	60	0.017	No
SLC35G5		1	1	60	0.017	No
PROX1		1	1	60	0.017	No
RENBP		1	1	60	0.017	No
ZDHHC14		1	1	60	0.017	No
ITFG1		1	1	60	0.017	No
VWA8		1	1	60	0.017	No
SLC22A25		1	1	60	0.017	No
NFX1		1	1	60	0.017	No
CLDN12		1	1	60	0.017	No
ACTRT2		1	1	60	0.017	No
HMX2		1	1	60	0.017	No
VWA7		1	1	60	0.017	No
VGLL3		1	1	60	0.017	No
AMER1		1	1	60	0.017	Yes
MEGF6		1	1	60	0.017	No
OR8K1		1	1	60	0.017	No
RGPD8		1	1	60	0.017	No
PTN		1	1	60	0.017	No
NOL4		1	1	60	0.017	No
PHYHIP		1	1	60	0.017	No
RGPD4		1	1	60	0.017	No
ZNF7		1	1	60	0.017	No
DRP2		1	1	60	0.017	No
PPP2CA		1	1	60	0.017	No
LIMA1		1	1	60	0.017	No
SUSD6		1	1	60	0.017	No
METTL8		1	1	60	0.017	No
HDX		1	1	60	0.017	No
UBL4A		1	1	60	0.017	No
LMLN		1	1	60	0.017	No
SVIL		1	1	60	0.017	No
OR8J3		1	1	60	0.017	No
MYEF2		1	1	60	0.017	No
OR8J1		1	1	60	0.017	No
OTOP1		1	1	60	0.017	No
AIG1		1	1	60	0.017	No
OTOP2		1	1	60	0.017	No
COLQ		1	1	60	0.017	No
KBTBD3		1	1	60	0.017	No
MPHOSPH9		1	1	60	0.017	No
GSTA5		1	1	60	0.017	No
CAPZA3		1	1	60	0.017	No
PRKRA		1	1	60	0.017	No
OR4A5		1	1	60	0.017	No
TRIML1		1	1	60	0.017	No
RIPOR3		1	1	60	0.017	No
FCGBP		1	1	60	0.017	No
TRBV19		1	1	60	0.017	No
KDM1B		1	1	60	0.017	No
HFE		1	1	60	0.017	Yes
ROGDI		1	1	60	0.017	No
CLEC18C		1	1	60	0.017	No
RHOXF2B		1	1	60	0.017	No
DCAF8L2		1	1	60	0.017	No
OR2T12		1	1	60	0.017	No
CLEC18A		1	1	60	0.017	No
CNDP2		1	1	60	0.017	No
C1RL		1	1	60	0.017	No
SACS		1	1	60	0.017	No
CHRNB4		1	1	60	0.017	No
SZT2		1	1	60	0.017	Yes
KDM2A		1	1	60	0.017	No
WNT5A		1	1	60	0.017	No
ANXA11		1	1	60	0.017	No
ALG13		1	1	60	0.017	No
VWDE		1	1	60	0.017	No
ATP1B2		1	1	60	0.017	No
GOLGA6L1		1	1	60	0.017	No
SHISA2		1	1	60	0.017	No
PCDHA12		1	1	60	0.017	No
PCDHA11		1	1	60	0.017	No
SHISA6		1	1	60	0.017	No
PRPF6		1	1	60	0.017	No
FAM161A		1	1	60	0.017	No
AMPH		1	1	60	0.017	No
MATR3		1	1	60	0.017	No
PNLIP		1	1	60	0.017	No
ZCCHC8		1	1	60	0.017	No
PMEL		1	1	60	0.017	No
CHRNA3		1	1	60	0.017	No
CHRNA5		1	1	60	0.017	No
NOP2		1	1	60	0.017	No
LPL		1	1	60	0.017	No
LPO		1	1	60	0.017	No
SCUBE3		1	1	60	0.017	No
HRH1		1	1	60	0.017	No
NLRP8		1	1	60	0.017	No
SCUBE1		1	1	60	0.017	No
ZMAT2		1	1	60	0.017	No
CDH20		1	1	60	0.017	No
NLRP5		1	1	60	0.017	No
CLSPN		1	1	60	0.017	No
FAM83D		1	1	60	0.017	No
BPTF		1	1	60	0.017	No
MPST		1	1	60	0.017	No
HELT		1	1	60	0.017	No
IDH1		1	1	60	0.017	Yes
CBX1		1	1	60	0.017	No
KLHDC1		1	1	60	0.017	No
COQ9		1	1	60	0.017	No
LRP1B		1	1	60	0.017	Yes
TSGA10		1	1	60	0.017	No
TRPV6		1	1	60	0.017	No
CAPRIN1		1	1	60	0.017	No
CASS4		1	1	60	0.017	No
ZSCAN4		1	1	60	0.017	No
DYNLRB1		1	1	60	0.017	No
FGFR4		1	1	60	0.017	Yes
LRP12		1	1	60	0.017	No
BMPR1A		1	1	60	0.017	Yes
FGFR1		1	1	60	0.017	Yes
KDM5B		1	1	60	0.017	No
KDM5C		1	1	60	0.017	Yes
PZP		1	1	60	0.017	No
OR8U3		2	1	60	0.017	No
RBM4		1	1	60	0.017	No
CASP8		1	1	60	0.017	Yes
SIX2		1	1	60	0.017	No
NTMT2		1	1	60	0.017	No
CASP2		1	1	60	0.017	No
NOS1		1	1	60	0.017	No
TOPBP1		1	1	60	0.017	No
KDM6A		1	1	60	0.017	Yes
RHBDF1		1	1	60	0.017	No
HGSNAT		1	1	60	0.017	No
OR52I2	0.0966	1	1	60	0.017	No
OR52I1		1	1	60	0.017	No
STPG4		1	1	60	0.017	No
SPATS2		1	1	60	0.017	No
OR4L1		1	1	60	0.017	No
LINC03040		1	1	60	0.017	No
TMPRSS11E		1	1	60	0.017	No
DCK		1	1	60	0.017	No
LSS		1	1	60	0.017	No
DNM2		1	1	60	0.017	Yes
CFAP221		1	1	60	0.017	No
CDH10		1	1	60	0.017	No
COL6A2		1	1	60	0.017	No
RASA1	0.0227	1	1	60	0.017	Yes
RASA2		1	1	60	0.017	No
IGDCC3		1	1	60	0.017	No
LTA		1	1	60	0.017	No
C14ORF39		1	1	60	0.017	No
CDH13		1	1	60	0.017	No
CDH15		1	1	60	0.017	No
CDH16		1	1	60	0.017	No
CDH17		1	1	60	0.017	No
PAPPA2		1	1	60	0.017	No
COLEC11		1	1	60	0.017	No
PDXK		1	1	60	0.017	No
COLEC10		1	1	60	0.017	No
KDM3B		1	1	60	0.017	No
OR4K5		1	1	60	0.017	No
NRXN1		1	1	60	0.017	No
BRAT1		1	1	60	0.017	No
OR4K1		1	1	60	0.017	No
ATP1A3		1	1	60	0.017	No
THBS2		1	1	60	0.017	No
THBS4		1	1	60	0.017	No
GNA13		1	1	60	0.017	Yes
MAPK8		1	1	60	0.017	No
PDE11A		1	1	60	0.017	No
NXF2		1	1	60	0.017	No
UGP2		1	1	60	0.017	No
IFNL1		1	1	60	0.017	No
FAM120B		1	1	60	0.017	No
TYW1		1	1	60	0.017	No
MUC4		1	1	60	0.017	No
ZNF286A	0.0201	1	1	60	0.017	No
NOS3		1	1	60	0.017	No
ATP13A1		1	1	60	0.017	No
KDM4E		1	1	60	0.017	No
LIMK2		1	1	60	0.017	No
QPCTL		1	1	60	0.017	No
CRYGC		1	1	60	0.017	No
SLC4A7		1	1	60	0.017	No
CAPN13		1	1	60	0.017	No
SLC4A8		1	1	60	0.017	No
SLC4A9		1	1	60	0.017	No
ATP13A3		1	1	60	0.017	No
LPIN1		1	1	60	0.017	No
LPIN2		1	1	60	0.017	No
FSIP2		1	1	60	0.017	No
USP6NL		1	1	60	0.017	No
ZFYVE9		1	1	60	0.017	No
ZFYVE1		1	1	60	0.017	No
TMEM92		1	1	60	0.017	No
ZDBF2		1	1	60	0.017	No
LIPE		1	1	60	0.017	No
IL4I1		1	1	60	0.017	No
NSDHL		1	1	60	0.017	No
LIPC		1	1	60	0.017	No
MPRIP		1	1	60	0.017	No
CYP2D6		1	1	60	0.017	No
PGAP6		1	1	60	0.017	No
LIPN		1	1	60	0.017	No
PSMD1		1	1	60	0.017	No
LRAT		1	1	60	0.017	No
MEF2A		1	1	60	0.017	No
GBP6		1	1	60	0.017	No
WDHD1		1	1	60	0.017	No
GBP7		1	1	60	0.017	No
CSNK2A1		1	1	60	0.017	No
STARD8		1	1	60	0.017	No
SETMAR		1	1	60	0.017	No
LRRC37B		1	1	60	0.017	No
TMEM81		1	1	60	0.017	No
SLC5A6		1	1	60	0.017	No
CNBD1		1	1	60	0.017	No
CNBD2		1	1	60	0.017	No
FLG2		1	1	60	0.017	No
SLC5A8		1	1	60	0.017	No
RBP5		1	1	60	0.017	No
SLC5A9		1	1	60	0.017	No
PRKAR1B	1.31e-12	1	1	60	0.017	No
PRKAR1A		1	1	60	0.017	Yes
CLDN9		1	1	60	0.017	No
RUFY4		1	1	60	0.017	No
ZFYVE19		1	1	60	0.017	No
RBP1		1	1	60	0.017	No
PSME4		1	1	60	0.017	No
PSME1		1	1	60	0.017	No
PADI4		1	1	60	0.017	No
LETMD1		1	1	60	0.017	No
ABCB1		1	1	60	0.017	Yes
ABCB7		1	1	60	0.017	No
MTMR8		1	1	60	0.017	No
MYNN		1	1	60	0.017	No
NCAPG		1	1	60	0.017	No
MTMR9		1	1	60	0.017	No
SLC5A1		1	1	60	0.017	No
IQGAP1		1	1	60	0.017	Yes
TAPBPL		1	1	60	0.017	No
OAZ3		1	1	60	0.017	No
C3		1	1	60	0.017	No
DYNC2LI1		1	1	60	0.017	No
PCNX1		1	1	60	0.017	No
C9		1	1	60	0.017	No
RSU1		1	1	60	0.017	No
ZBTB7C		1	1	60	0.017	No
EDEM3		1	1	60	0.017	No
ZNF264		1	1	60	0.017	No
MYH7B		1	1	60	0.017	No
PRRT2		1	1	60	0.017	No
ABCA9		1	1	60	0.017	No
OR2J2		1	1	60	0.017	No
ABCA7		1	1	60	0.017	No
HRNR		1	1	60	0.017	No
ABTB2		1	1	60	0.017	No
H1-4		1	1	60	0.017	Yes
CYP2C8		1	1	60	0.017	No
FAM135B		2	1	60	0.017	No
COL1A2		1	1	60	0.017	No
FAM135A		1	1	60	0.017	No
TDP2		1	1	60	0.017	No
DCHS2		1	1	60	0.017	No
HRC		1	1	60	0.017	No
C11ORF16		1	1	60	0.017	No
PSMG1		1	1	60	0.017	No
DCHS1		1	1	60	0.017	No
NOX5		1	1	60	0.017	No
EFCC1		1	1	60	0.017	No
PRRT4		1	1	60	0.017	No
NOX1		1	1	60	0.017	No
ZNF254		1	1	60	0.017	No
PIGR		1	1	60	0.017	No
ZNF250		1	1	60	0.017	No
NCAN		1	1	60	0.017	No
RPLP0		1	1	60	0.017	No
LRRC4		1	1	60	0.017	No
MRPL35		1	1	60	0.017	No
EFCAB8		1	1	60	0.017	No
TRIOBP		1	1	60	0.017	No
EDRF1		1	1	60	0.017	No
TUBA1A		1	1	60	0.017	No
FLVCR2		1	1	60	0.017	No
NELFA		1	1	60	0.017	No
IKBIP		1	1	60	0.017	No
UPF1		1	1	60	0.017	Yes
CLUL1		1	1	60	0.017	No
NSUN4		1	1	60	0.017	No
ELOVL2		1	1	60	0.017	No
MYOF		1	1	60	0.017	No
MRPL47		1	1	60	0.017	No
TMC7		1	1	60	0.017	No
TMC6		1	1	60	0.017	No
LRRD1		1	1	60	0.017	No
TMC4		1	1	60	0.017	No
BIVM-ERCC5		2	1	60	0.017	No
LRRC41		1	1	60	0.017	No
SUMF2		1	1	60	0.017	No
FAHD2A		1	1	60	0.017	No
F5		1	1	60	0.017	No
PIGB		1	1	60	0.017	No
C20ORF96		2	1	60	0.017	No
LRRC7		1	1	60	0.017	No
KCNMA1		1	1	60	0.017	No
PIGK		1	1	60	0.017	No
LRRC3B		1	1	60	0.017	No
SMTNL2	0.00125	1	1	60	0.017	No
DLD		1	1	60	0.017	No
ZNF234		1	1	60	0.017	No
LRRC14		1	1	60	0.017	No
KANK1		1	1	60	0.017	No
KATNIP		1	1	60	0.017	No
SRRT		1	1	60	0.017	No
HTT		1	1	60	0.017	No
STATH		1	1	60	0.017	No
AXDND1		1	1	60	0.017	No
GLRA2		1	1	60	0.017	No
UNK		1	1	60	0.017	No
GBX2		1	1	60	0.017	No
TMEM65		1	1	60	0.017	No
H3C13		1	1	60	0.017	Yes
H3C11		1	1	60	0.017	Yes
NTF3		1	1	60	0.017	No
STAT4		1	1	60	0.017	Yes
GC		1	1	60	0.017	No
CSMD1		1	1	60	0.017	No
PMS1		1	1	60	0.017	Yes
ZNF223		1	1	60	0.017	No
SRSF11		1	1	60	0.017	No
NKTR		1	1	60	0.017	No
ZNF222		1	1	60	0.017	No
EVC2		1	1	60	0.017	No
GSX1		1	1	60	0.017	No
OR14A16		1	1	60	0.017	No
USP9X		1	1	60	0.017	No
UTP3		1	1	60	0.017	No
PLXDC2		1	1	60	0.017	No
GLRA4		1	1	60	0.017	No
LRRC20		1	1	60	0.017	No
FOXR1		1	1	60	0.017	No
TTLL6		1	1	60	0.017	No
TTLL5		1	1	60	0.017	No
UBAP1		1	1	60	0.017	No
UBAP2		1	1	60	0.017	No
OR10G8		1	1	60	0.017	No
OR10G9		1	1	60	0.017	No
ERO1A		1	1	60	0.017	No
PECR		1	1	60	0.017	No
ZBTB24		1	1	60	0.017	No
FAM13A		1	1	60	0.017	No
RORA		1	1	60	0.017	No
LRRC70		1	1	60	0.017	No
RORB		1	1	60	0.017	No
SLC9C1		1	1	60	0.017	No
FAM228B		1	1	60	0.017	No
EIF4ENIF1		1	1	60	0.017	No
MTRF1		1	1	60	0.017	No
HEPHL1		1	1	60	0.017	No
STK16		1	1	60	0.017	No
KPNA6		1	1	60	0.017	No
KPNA7		1	1	60	0.017	No
ZNF689		1	1	60	0.017	No
PITX2		1	1	60	0.017	No
SLC25A45		1	1	60	0.017	No
SH2D5		1	1	60	0.017	No
SLC16A5		1	1	60	0.017	No
IGHV5-51		1	1	60	0.017	No
MYLIP		1	1	60	0.017	No
ZBTB38		1	1	60	0.017	No
ZBTB37		1	1	60	0.017	No
FOXP4		1	1	60	0.017	No
OR2T6		1	1	60	0.017	No
FTSJ3		1	1	60	0.017	No
ACAP3		1	1	60	0.017	No
MAG		1	1	60	0.017	No
ACAP1		1	1	60	0.017	No
FRMD6		2	1	60	0.017	No
TXLNA		1	1	60	0.017	No
C18ORF54		1	1	60	0.017	No
ANAPC5		1	1	60	0.017	No
UTRN		1	1	60	0.017	No
DSC1		1	1	60	0.017	No
DSC2		1	1	60	0.017	No
KPNB1		1	1	60	0.017	No
ANAPC1		1	1	60	0.017	No
ZNF674		1	1	60	0.017	No
RNASEH2B		1	1	60	0.017	Yes
GPR85		1	1	60	0.017	No
TNFRSF11B		1	1	60	0.017	No
THADA		1	1	60	0.017	No
TMEM31		1	1	60	0.017	No
FOXO1		1	1	60	0.017	Yes
SLC9A1		1	1	60	0.017	No
BCL2L12		1	1	60	0.017	No
SBNO2		1	1	60	0.017	No
ATXN1		1	1	60	0.017	No
ATXN7		1	1	60	0.017	Yes
DSEL		1	1	60	0.017	No
CLTCL1		1	1	60	0.017	Yes
STK38		1	1	60	0.017	No
CPAMD8		1	1	60	0.017	No
TRIM49B		1	1	60	0.017	No
MDN1		1	1	60	0.017	No
SOCS4		1	1	60	0.017	No
LRRC4B		1	1	60	0.017	No
ZNF662		1	1	60	0.017	No
BCL2L15		1	1	60	0.017	No
COL28A1		1	1	60	0.017	No
GOT2		1	1	60	0.017	No
FOXN3		1	1	60	0.017	No
MCC		1	1	60	0.017	No
DCDC1		1	1	60	0.017	No
PTPRB		1	1	60	0.017	Yes
PTPRC		1	1	60	0.017	Yes
SLCO1A2		1	1	60	0.017	No
AAK1		1	1	60	0.017	No
NFE2L1		1	1	60	0.017	No
POMT2		1	1	60	0.017	No
CNTNAP3		1	1	60	0.017	No
CNTNAP2		1	1	60	0.017	No
CELF1		1	1	60	0.017	No
RASGRF2		1	1	60	0.017	No
RASGRF1		1	1	60	0.017	No
CELF3		1	1	60	0.017	No
LRRK1		1	1	60	0.017	No
FHL3		1	1	60	0.017	No
FCGR3B		1	1	60	0.017	No
PRB3		1	1	60	0.017	No
IQUB		1	1	60	0.017	No
OR2Y1		1	1	60	0.017	No
PDILT		1	1	60	0.017	No
DNM1L		1	1	60	0.017	No
SPG11		1	1	60	0.017	No
SLFN12L		1	1	60	0.017	No
DIS3L2		1	1	60	0.017	No
EMX2		1	1	60	0.017	No
ARNT		1	1	60	0.017	Yes
PARD3B		1	1	60	0.017	No
QTRT1		1	1	60	0.017	No
GIGYF1		1	1	60	0.017	No
CYP2A6		1	1	60	0.017	No
SLC25A18		1	1	60	0.017	No
IL1RAPL1		1	1	60	0.017	No
BIRC5		1	1	60	0.017	No
BIRC6		1	1	60	0.017	No
MET		1	1	60	0.017	Yes
ST6GALNAC4		1	1	60	0.017	No
BIRC2		1	1	60	0.017	No
AHDC1		1	1	60	0.017	No
ERAS		1	1	60	0.017	No
GTF3C1		1	1	60	0.017	No
RBPJL		1	1	60	0.017	No
ITIH2		1	1	60	0.017	No
SLC47A1		1	1	60	0.017	No
USP27X		1	1	60	0.017	No
ZBTB47		1	1	60	0.017	No
PPM1L		1	1	60	0.017	No
GTF3C6		1	1	60	0.017	No
PRCC		1	1	60	0.017	Yes
ITIH6		1	1	60	0.017	No
ITIH1		1	1	60	0.017	No
RNFT1		1	1	60	0.017	No
SLC25A27		1	1	60	0.017	No
CNNM1		1	1	60	0.017	No
SLITRK1		1	1	60	0.017	No
SLITRK4		1	1	60	0.017	No
SLITRK3		1	1	60	0.017	No
SLITRK5		1	1	60	0.017	No
IARS1		1	1	60	0.017	No
ZNF620		1	1	60	0.017	No
ATP9B		1	1	60	0.017	No
SLC12A2		1	1	60	0.017	No
LINGO2		2	1	60	0.017	No
LINGO1		1	1	60	0.017	No
METAP1D		1	1	60	0.017	No
CTNS		1	1	60	0.017	No
MBOAT2		1	1	60	0.017	No
CTCFL		1	1	60	0.017	No
NELL1		1	1	60	0.017	No
PC		1	1	60	0.017	Yes
MTRFR		1	1	60	0.017	No
ZNF619		1	1	60	0.017	No
DOP1B		1	1	60	0.017	No
ZNF615		1	1	60	0.017	No
ZNF613		1	1	60	0.017	No
ZNF611		1	1	60	0.017	No
ZNF610		1	1	60	0.017	No
LPGAT1		1	1	60	0.017	No
TAS2R20		1	1	60	0.017	No
TMEM41B		1	1	60	0.017	No
DNHD1		1	1	60	0.017	No
JMJD1C		1	1	60	0.017	No
ZDHHC8		1	1	60	0.017	No
CCAR2		1	1	60	0.017	No
CCAR1		1	1	60	0.017	No
RASSF2		1	1	60	0.017	No
POF1B		1	1	60	0.017	No
RASSF3		1	1	60	0.017	No
ZNF726		1	1	60	0.017	No
CCN4		1	1	60	0.017	No
CCN3		1	1	60	0.017	No
CCNL2		1	1	60	0.017	No
EPHB1		1	1	60	0.017	Yes
EPHA7		1	1	60	0.017	Yes
ENTPD4		1	1	60	0.017	No
PAQR5		1	1	60	0.017	No
SLC34A1		1	1	60	0.017	No
C22ORF42		1	1	60	0.017	No
ENTPD6		1	1	60	0.017	No
TAS2R14		1	1	60	0.017	No
HNF1B		1	1	60	0.017	Yes
IMP4		1	1	60	0.017	No
ANK3		1	1	60	0.017	No
THAP4		1	1	60	0.017	No
DHX40		1	1	60	0.017	No
FNDC1		1	1	60	0.017	No
MIP		1	1	60	0.017	No
LACTB2		1	1	60	0.017	No
ULK3		1	1	60	0.017	No
ZNF713		1	1	60	0.017	No
ULK2		1	1	60	0.017	No
LAP3		1	1	60	0.017	No
CTXN3		1	1	60	0.017	No
CRACD		1	1	60	0.017	No
RTF2		1	1	60	0.017	No
TAS2R46		1	1	60	0.017	No
PIK3R3		1	1	60	0.017	Yes
CD1E		1	1	60	0.017	No
PIK3R2		1	1	60	0.017	Yes
PPP1R3A		1	1	60	0.017	No
MST1R		1	1	60	0.017	Yes
BRCC3		1	1	60	0.017	No
PCDH19		1	1	60	0.017	No
ZMPSTE24		1	1	60	0.017	No
DHX30		1	1	60	0.017	No
PGBD4		1	1	60	0.017	No
PCBP1		1	1	60	0.017	Yes
TSPAN6		1	1	60	0.017	No
MICAL1		1	1	60	0.017	No
ST8SIA4		1	1	60	0.017	No
DHX38		1	1	60	0.017	No
HIVEP3		1	1	60	0.017	No
ARSG		1	1	60	0.017	No
CTSA		1	1	60	0.017	No
PPP1R27		1	1	60	0.017	No
FOXF2		1	1	60	0.017	No
INTS1		1	1	60	0.017	No
IQSEC1		1	1	60	0.017	No
RCC2		1	1	60	0.017	No
INTS3		1	1	60	0.017	No
LRRN4		1	1	60	0.017	No
MICAL2		1	1	60	0.017	No
CELA1		1	1	60	0.017	No
PRG3		1	1	60	0.017	No
TAS2R39		1	1	60	0.017	No
PNMA8B		1	1	60	0.017	No
TG		1	1	60	0.017	No
WNK3		1	1	60	0.017	No
COL9A1		1	1	60	0.017	No
PAF1		1	1	60	0.017	No
COL9A3		1	1	60	0.017	No
COL9A2		1	1	60	0.017	No
INTS6		1	1	60	0.017	Yes
RGL2		1	1	60	0.017	No
PCSK2		1	1	60	0.017	No
PTPRT		1	1	60	0.017	Yes
FKBP11		1	1	60	0.017	No
PPP1R17		1	1	60	0.017	No
INTS13		1	1	60	0.017	No
FKBP15		1	1	60	0.017	No
MOGAT3		1	1	60	0.017	No
SUV39H1		1	1	60	0.017	No
AKR1B1		1	1	60	0.017	No
PCSK9		1	1	60	0.017	No
PTPRJ		1	1	60	0.017	No
BRCA2		1	1	60	0.017	Yes
PEPD		1	1	60	0.017	No
PTPRH		1	1	60	0.017	No
KIF15		1	1	60	0.017	No
CTSO		1	1	60	0.017	No
SCML1		1	1	60	0.017	No
SPANXN2		1	1	60	0.017	No
HYAL2		1	1	60	0.017	No
MLX		1	1	60	0.017	No
HYAL4		1	1	60	0.017	No
ARIH1		1	1	60	0.017	No
LMCD1		1	1	60	0.017	No
CCDC112		1	1	60	0.017	No
NCOA2		1	1	60	0.017	Yes
CCT2		1	1	60	0.017	No
MME		1	1	60	0.017	No
NCOA5		1	1	60	0.017	No
ZFR		1	1	60	0.017	No
SORCS1		1	1	60	0.017	No
ANO7		1	1	60	0.017	No
OSMR		1	1	60	0.017	No
SORCS3		1	1	60	0.017	No
NBPF1		1	1	60	0.017	No
AJAP1		1	1	60	0.017	No
MN1		1	1	60	0.017	Yes
NCR2		1	1	60	0.017	No
ANO1		1	1	60	0.017	No
SAGE1		1	1	60	0.017	No
KIF2C		1	1	60	0.017	No
NCOA7		1	1	60	0.017	No
ZNF780A		1	1	60	0.017	No
PDZRN3		1	1	60	0.017	No
OR3A2		1	1	60	0.017	No
PDZRN4		1	1	60	0.017	No
SPINDOC		1	1	60	0.017	No
CRYBA2		1	1	60	0.017	No
COL19A1		1	1	60	0.017	No
CPN2		1	1	60	0.017	No
SAMM50		1	1	60	0.017	No
SERTAD4		1	1	60	0.017	No
PLEKHG4B		1	1	60	0.017	No
MARCHF8		1	1	60	0.017	No
MARCHF7		1	1	60	0.017	No
C22ORF23		1	1	60	0.017	No
CD59		1	1	60	0.017	No
HEATR4		1	1	60	0.017	No
CD58		1	1	60	0.017	Yes
GPC6		1	1	60	0.017	No
MARCHF6		1	1	60	0.017	No
LNPK		1	1	60	0.017	No
CAVIN4		1	1	60	0.017	No
HUWE1		1	1	60	0.017	No
C7ORF25		1	1	60	0.017	No
PLEKHA4		1	1	60	0.017	No
GARS1		1	1	60	0.017	No
GPAM		1	1	60	0.017	No
GLB1L		1	1	60	0.017	No
NEDD4		1	1	60	0.017	No
EPPK1		1	1	60	0.017	No
TARDBP		1	1	60	0.017	No
FHOD3		1	1	60	0.017	No
SH3GL3		1	1	60	0.017	No
ERCC6L		1	1	60	0.017	No
MIDN		1	1	60	0.017	No
DCLRE1C		1	1	60	0.017	No
MPG		1	1	60	0.017	No
WWC1		1	1	60	0.017	No
CCDC168		1	1	60	0.017	No
RTL9		1	1	60	0.017	No
GIMAP5		1	1	60	0.017	No
GIMAP6		1	1	60	0.017	No
GIMAP8		1	1	60	0.017	No
RGS2		1	1	60	0.017	No
CAPN8		1	1	60	0.017	No
CAPN9		1	1	60	0.017	No
KIF5B		1	1	60	0.017	Yes
SCN9A		1	1	60	0.017	No
DUOXA2		1	1	60	0.017	No
PPFIA1		1	1	60	0.017	No
WWC3		1	1	60	0.017	No
SBF1		1	1	60	0.017	No
ARHGEF40		1	1	60	0.017	No
ARID2		1	1	60	0.017	Yes
SBF2		1	1	60	0.017	No
SH3GL1		1	1	60	0.017	Yes
PDGFRB		1	1	60	0.017	Yes
ZBP1		1	1	60	0.017	No
PDGFRA		1	1	60	0.017	Yes
CD96		1	1	60	0.017	No
KIRREL1		1	1	60	0.017	No
ZGPAT		2	1	60	0.017	No
TPRA1		1	1	60	0.017	No
HFM1		1	1	60	0.017	No
ADPRHL1		1	1	60	0.017	No
TEX56P		1	1	60	0.017	No
CCDC157		1	1	60	0.017	No
LMTK2		1	1	60	0.017	No
SLC30A1		1	1	60	0.017	No
RPGRIP1L		1	1	60	0.017	No
RUNDC3B		1	1	60	0.017	No
KLHL40		1	1	60	0.017	No
ERMN		1	1	60	0.017	No
IGHV1-18		1	1	60	0.017	No
KLHL42		1	1	60	0.017	No
ERN2		1	1	60	0.017	No
DOK2		1	1	60	0.017	No
TMX4		1	1	60	0.017	No
ERICH6B		1	1	60	0.017	No
[truncated: 697 more rows]
