# Supplementary material for: Molecular subtyping of endometrial carcinoma cell lines uncovers subtype-specific targetable vulnerabilities
Source: Research Square preprint supplement (doi:10.21203/rs.3.rs-6536216/v1), 2025-05-10
Supplement: Supplementary file 3 [file 885113248e6ac00553dcd625.xlsx]

## Sheet: Fig 5a data
Table S6. Genetic dependency scores of ARID1A/B-dual deficient cancer cell lines vs endometrial cancer cell lines. Genome-wide CRISPR screen data was downloaded from the DepMap database.
Gene Name	dual_diff_mean	other_mean	Difference	p
A1CF	-0.0594232	-0.0755285	0.0161053	0.723647
A2M	0.131843	0.0590337	0.0728095	0.658531
A2ML1	-0.0198116	0.104288	-0.1241	0.0314933
A3GALT2	-0.311312	-0.15702	-0.154292	0.0930783
A4GALT	-0.0485052	-0.0489135	0.000408326	0.882884
A4GNT	0.0963033	0.0537469	0.0425564	0.36106
AAAS	-0.0752956	-0.207994	0.132698	0.14883
AACS	0.0792905	0.0195303	0.0597602	0.330915
AADAC	0.0625266	0.14851	-0.0859836	0.132942
AADACL2	0.0397109	0.058245	-0.018534	0.616465
AADACL3	-0.0130595	0.0715541	-0.0846136	0.36106
AADACL4	0.0281639	0.0579131	-0.0297492	0.882884
AADAT	-0.0216635	-0.0737618	0.0520983	0.745869
AAGAB	0.251305	0.0470308	0.204274	0.0634314
AAK1	-0.0293509	-0.1462	0.116849	0.0722992
AAMDC	-0.132753	-0.0813414	-0.0514111	0.929568
AAMP	-1.42123	-1.26101	-0.160222	0.36106
AANAT	-0.0360346	-0.105553	0.0695188	0.250536
AAR2	-0.0970464	-0.0109061	-0.0861402	0.275659
AARD	-0.126075	-0.198345	0.0722701	0.275659
AARS1	-2.40918	-2.18702	-0.222165	0.275659
AARS2	-0.418573	-0.394192	-0.0243805	0.745869
AARSD1	-0.160559	-0.246223	0.0856637	0.14883
AASDH	0.00505829	-0.0375685	0.0426268	0.882884
AASDHPPT	-0.210735	-0.159218	-0.0515163	0.976496
AASS	0.00270681	0.0453795	-0.0426727	0.497997
AATF	-0.842597	-0.891363	0.0487657	0.745869
AATK	-0.169425	-0.143055	-0.02637	0.616465
ABAT	0.0162468	-0.00676557	0.0230124	0.575621
ABCA1	-0.0451991	-0.0143861	-0.030813	0.929568
ABCA10	-0.174843	-0.0510755	-0.123768	0.0930783
ABCA12	0.00476646	0.0158047	-0.0110382	0.929568
ABCA13	0.0181624	0.0131344	0.00502799	0.575621
ABCA2	-0.0250579	0.00436427	-0.0294222	0.658531
ABCA3	0.133624	0.0306976	0.102926	0.132942
ABCA4	-0.208095	-0.250924	0.0428288	0.330915
ABCA5	-0.0699447	-0.0185704	-0.0513743	0.497997
ABCA6	0.022864	0.0296984	-0.00683442	0.976496
ABCA7	0.100728	0.0889835	0.0117445	0.882884
ABCA8	0.00707081	-0.0190873	0.0261581	0.836604
ABCA9	0.0550622	0.119615	-0.0645527	0.14883
ABCB1	-0.0816685	-0.139954	0.0582853	0.497997
ABCB10	-0.00670348	-0.00985275	0.00314927	0.790882
ABCB11	-0.00655116	-0.091884	0.0853328	0.0821572
ABCB4	0.00393942	-0.0473618	0.0513012	0.745869
ABCB5	0.0291617	-0.0519877	0.0811494	0.575621
ABCB6	0.0706648	0.0348929	0.0357719	0.790882
ABCB7	-1.5013	-1.15746	-0.343839	0.227057
ABCB8	0.0552745	0.035043	0.0202315	0.658531
ABCB9	0.10121	0.0354081	0.0658022	0.36106
ABCC1	-0.011405	0.0271133	-0.0385183	0.701708
ABCC10	-0.128298	-0.142827	0.014529	1
ABCC11	0.118919	0.0335356	0.0853833	0.0364513
ABCC12	-0.00756891	0.0325477	-0.0401166	0.426326
ABCC2	0.0989904	-0.0383289	0.137319	0.0364513
ABCC3	0.0548187	0.00515434	0.0496644	0.976496
ABCC4	0.265932	0.175542	0.0903903	0.14883
ABCC5	0.0182662	0.0578511	-0.0395849	0.701708
ABCC8	0.0718369	0.0998761	-0.0280393	0.836604
ABCC9	0.00146107	-0.00177327	0.00323434	0.790882
ABCD1	-0.184313	-0.169207	-0.0151058	0.929568
ABCD2	-0.164441	-0.0122115	-0.152229	0.461384
ABCD3	-0.232835	-0.146145	-0.0866907	0.227057
ABCD4	-0.0779043	-0.0646669	-0.0132374	0.36106
ABCE1	-1.97997	-2.13873	0.158758	0.461384
ABCF1	-1.20922	-1.19484	-0.0143802	0.836604
ABCF3	0.113365	0.0654773	0.0478881	0.205191
ABCG1	0.0539986	0.0113526	0.042646	0.426326
ABCG2	0.116899	0.0754692	0.0414293	0.392872
ABCG4	0.0458228	0.0707753	-0.0249525	0.701708
ABCG5	0.0834538	0.0532757	0.0301781	0.36106
ABCG8	0.0136032	0.0467991	-0.033196	0.461384
ABHD1	0.120006	0.0518262	0.0681796	0.0722992
ABHD10	0.0275317	-0.0405258	0.0680575	0.302448
ABHD11	-0.3125	-0.333957	0.0214569	0.745869
ABHD12	0.0475952	0.0452757	0.00231945	1
ABHD12B	0.0752382	0.0864224	-0.0111841	0.658531
ABHD13	-0.000426692	-0.0911019	0.0906752	0.302448
ABHD14A	0.00476404	0.0493187	-0.0445547	0.461384
ABHD14B	0.103744	0.0343165	0.0694275	0.497997
ABHD15	-0.41724	-0.371863	-0.0453769	0.790882
ABHD16A	-0.0503064	-0.086593	0.0362866	0.426326
ABHD16B	0.132667	0.0402507	0.0924167	0.184898
ABHD17A	-0.203222	-0.383955	0.180733	0.132942
ABHD17B	-0.0729217	0.0172005	-0.0901222	0.184898
ABHD17C	0.139251	0.0998376	0.0394137	0.461384
ABHD18	0.259543	0.115727	0.143816	0.0232906
ABHD2	-0.148516	-0.021322	-0.127194	0.426326
ABHD3	-0.11859	-0.132266	0.0136756	0.790882
ABHD4	0.0973149	0.0589701	0.0383448	0.882884
ABHD5	-0.0396061	-0.0177944	-0.0218116	0.745869
ABHD6	0.0583641	0.0868623	-0.0284982	0.227057
ABHD8	-0.0610135	-0.0120677	-0.0489458	0.302448
ABI1	0.128534	-0.0190476	0.147581	0.0634314
ABI2	0.0938339	0.0851192	0.00871466	0.976496
ABI3	0.0022699	0.109803	-0.107533	0.0821572
ABI3BP	0.0348177	0.0424094	-0.00759162	1
ABITRAM	-0.02494	-0.021139	-0.003801	0.616465
ABL1	-0.0153805	0.00115148	-0.016532	0.302448
ABL2	0.142047	0.07257	0.0694774	0.745869
ABLIM1	0.0283829	0.0625943	-0.0342114	0.36106
ABLIM2	-0.0703982	0.0170112	-0.0874094	0.184898
ABLIM3	0.151802	-0.0072421	0.159044	0.00733777
ABR	-0.105326	-0.0888081	-0.0165176	0.745869
ABRA	0.057281	0.0146054	0.0426756	0.497997
ABRACL	0.230211	0.152461	0.0777506	0.0314933
ABRAXAS1	-0.327358	-0.315364	-0.0119939	0.745869
ABRAXAS2	0.304942	0.11039	0.194552	0.14883
ABT1	-1.31346	-1.02095	-0.292501	0.132942
ABTB1	0.0866436	0.0473019	0.0393417	0.275659
ABTB2	-0.079899	0.001021	-0.08092	0.0821572
ABTB3	0.0254663	0.0358737	-0.0104074	0.701708
ACAA1	0.0222694	0.087245	-0.0649756	0.497997
ACAA2	-0.0312305	-0.0526235	0.021393	0.745869
ACACA	-0.0716832	-0.213957	0.142274	0.132942
ACACB	-0.139578	-0.0625948	-0.0769835	0.36106
ACAD10	-0.0310047	-0.0771708	0.0461662	0.227057
ACAD11	0.0684837	0.0315674	0.0369163	0.461384
ACAD8	-0.0402667	-0.0199787	-0.020288	0.616465
ACAD9	-0.407966	-0.296729	-0.111237	0.275659
ACADL	0.0990819	-0.00304263	0.102125	0.0930783
ACADM	0.057827	0.0297625	0.0280645	0.836604
ACADS	-0.0490379	-0.0366341	-0.0124039	1
ACADSB	-0.0490754	-0.0286452	-0.0204302	0.330915
ACADVL	-0.0250034	-0.00808362	-0.0169198	0.790882
ACAN	0.1641	-0.00127143	0.165372	0.118399
ACAP1	0.0169392	0.00305646	0.0138827	0.976496
ACAP2	-0.159829	-0.0904614	-0.0693672	0.497997
ACAP3	-0.156421	-0.19144	0.0350187	0.658531
ACAT1	0.0169974	0.0305629	-0.0135656	0.882884
ACAT2	0.14052	0.187059	-0.0465389	0.976496
ACBD3	0.0456669	0.0262634	0.0194035	0.976496
ACBD4	-0.121962	-0.114123	-0.00783858	1
ACBD5	0.0905217	0.0927206	-0.00219894	0.929568
ACBD6	0.0824753	0.0827783	-0.000302945	0.836604
ACBD7	-0.0262051	0.0946196	-0.120825	0.227057
ACCS	0.0096351	0.00519792	0.00443718	0.882884
ACCSL	0.0289579	-0.051499	0.0804568	0.330915
ACD	-0.329579	-0.309803	-0.0197754	0.701708
ACE	-0.0800631	-0.132414	0.0523505	0.302448
ACE2	0.271403	0.234741	0.0366615	0.536102
ACER1	-0.105043	-0.12029	0.0152464	1
ACER2	0.0748142	0.0840444	-0.00923019	0.745869
ACER3	0.205318	0.123391	0.0819265	0.184898
ACHE	-0.244286	-0.275638	0.0313519	0.701708
ACIN1	-0.592382	-0.802209	0.209826	0.105135
ACKR1	0.160715	0.024987	0.135728	0.0420594
ACKR2	0.155096	0.0924808	0.0626154	0.105135
ACKR3	0.163345	0.0527798	0.110565	0.275659
ACKR4	-0.110885	-0.163924	0.0530385	0.616465
ACLY	-0.427633	-0.364261	-0.0633725	0.882884
ACMSD	0.119347	0.0814931	0.0378538	0.302448
ACO1	-0.0303684	0.0167867	-0.0471551	0.330915
ACO2	-0.787148	-0.709355	-0.0777926	0.976496
ACOD1	0.135426	0.0926831	0.042743	0.330915
ACOT11	0.027733	0.00904527	0.0186877	0.745869
ACOT12	-0.318736	-0.201543	-0.117193	0.105135
ACOT13	0.0116684	0.0189712	-0.00730282	0.836604
ACOT2	0.00563286	0.0853098	-0.0796769	0.166129
ACOT4	-0.0602647	-0.0665	0.00623524	0.790882
ACOT6	-0.0513094	-0.0580579	0.00674848	0.976496
ACOT7	0.221849	0.0830697	0.138779	0.0722992
ACOT8	0.0432076	0.0747663	-0.0315587	0.302448
ACOT9	0.144673	0.0390131	0.10566	0.0271254
ACOX1	-0.0252412	-0.182099	0.156858	0.275659
ACOX2	-0.140734	-0.119943	-0.0207914	0.882884
ACOX3	0.222905	0.0751063	0.147799	0.0122681
ACOXL	-0.238509	-0.24474	0.00623031	0.790882
ACP1	0.113081	0.171801	-0.0587196	0.227057
ACP2	-0.0955967	-0.00708414	-0.0885126	0.392872
ACP3	0.263206	0.125227	0.137978	0.0722992
ACP4	-0.024656	0.0562989	-0.0809549	0.227057
ACP5	0.046844	0.0204259	0.0264181	0.616465
ACP6	0.00675356	-0.00438378	0.0111373	0.882884
ACP7	-0.144892	-0.217107	0.0722155	0.14883
ACR	-0.365047	-0.20405	-0.160998	0.0634314
ACRBP	0.0249257	-0.0221672	0.047093	0.461384
ACRV1	0.180558	0.18971	-0.0091524	0.976496
ACSBG1	0.0427674	0.093318	-0.0505506	0.227057
ACSBG2	-0.0236998	-0.000259608	-0.0234402	0.536102
ACSF2	-0.0592805	-0.12006	0.0607794	0.790882
ACSF3	0.202345	0.175511	0.0268342	0.658531
ACSL1	-0.0453376	0.0571696	-0.102507	0.0722992
ACSL3	-0.209674	-0.251136	0.0414623	0.658531
ACSL4	-0.0710999	-0.150635	0.0795353	0.536102
ACSL5	-0.00995523	0.0253868	-0.035342	0.976496
ACSL6	-0.0951919	-0.0209559	-0.0742359	0.392872
ACSM1	0.0284971	0.0302744	-0.00177734	0.882884
ACSM2A	0.190134	0.193008	-0.0028741	0.836604
ACSM3	-0.018184	0.0196788	-0.0378628	0.929568
ACSM4	0.138888	0.0485359	0.0903523	0.497997
ACSM5	0.115731	0.0182946	0.0974363	0.14883
ACSM6	0.164229	-0.00287824	0.167107	0.0232906
ACSS1	0.148175	0.0786153	0.0695593	0.118399
ACSS2	0.195361	0.102896	0.0924643	0.118399
ACSS3	0.0526893	0.0729632	-0.0202739	0.976496
ACTA1	-0.0221192	-0.0908158	0.0686966	0.575621
ACTA2	0.0344275	0.0663251	-0.0318976	0.461384
ACTB	-0.490545	-0.570957	0.0804119	0.275659
ACTBL2	0.118829	0.0519493	0.0668799	0.929568
ACTC1	0.0431029	0.0134562	0.0296466	0.976496
ACTG1	-0.926287	-0.889902	-0.0363852	1
ACTG2	0.0482741	0.0355168	0.0127572	0.929568
ACTL10	0.133679	0.177329	-0.0436501	0.392872
ACTL6A	-1.54831	-1.51042	-0.0378944	0.836604
ACTL6B	0.137794	0.068242	0.0695515	0.745869
ACTL7A	0.0462611	-0.0987685	0.14503	0.105135
ACTL7B	0.159675	0.0812246	0.0784499	0.392872
ACTL8	0.0167632	0.0261482	-0.00938498	0.976496
ACTL9	0.0495217	-0.0156182	0.0651399	0.302448
ACTMAP	0.308197	0.215823	0.0923736	0.227057
ACTN1	-0.063447	-0.0856878	0.0222408	0.616465
ACTN2	0.164932	0.0924992	0.0724325	0.250536
ACTN4	0.0168029	-0.000622013	0.017425	0.836604
ACTR10	-1.42376	-1.44159	0.017829	0.882884
ACTR1A	-0.542118	-0.647887	0.105769	0.929568
ACTR1B	-0.201303	-0.255515	0.0542118	0.575621
ACTR2	-1.25389	-1.40352	0.149626	0.426326
ACTR3	-0.414827	-0.471229	0.0564023	0.575621
ACTR3B	0.000758203	-0.00799568	0.00875388	0.745869
ACTR5	-0.0189311	-0.0959435	0.0770124	0.701708
ACTR6	-0.650907	-0.614913	-0.0359934	0.701708
ACTR8	-0.48161	-0.474299	-0.00731117	0.976496
ACTRT1	0.119525	0.179688	-0.0601626	0.497997
ACTRT2	0.280927	0.167871	0.113057	0.0634314
ACTRT3	-0.137344	-0.135444	-0.0019003	0.929568
ACVR1	0.0943744	0.032324	0.0620504	0.658531
ACVR1B	-0.163506	-0.115415	-0.0480915	0.658531
ACVR1C	0.152491	0.0178281	0.134663	0.0634314
ACVR2A	-0.153074	-0.0578222	-0.0952518	0.701708
ACVR2B	0.0391735	0.0597814	-0.0206079	0.575621
ACVRL1	0.123776	0.0340156	0.0897608	0.250536
ACY1	0.0763076	0.0977258	-0.0214182	0.616465
ACY3	-0.225787	-0.107561	-0.118226	0.0930783
ACYP1	-0.0220606	0.014815	-0.0368755	0.575621
ACYP2	0.0368302	0.0634193	-0.0265891	0.616465
ADA	-0.0549434	-0.0582172	0.00327386	0.836604
ADA2	0.0139728	-0.0188103	0.032783	0.929568
ADAD1	0.18856	0.113972	0.0745887	0.14883
ADAD2	-0.0525186	-0.0416861	-0.0108325	0.836604
ADAL	-0.135122	-0.055726	-0.0793957	0.0420594
ADAM10	-0.127488	-0.00997654	-0.117511	0.790882
ADAM11	-0.310126	-0.405513	0.0953871	0.275659
ADAM12	0.0264222	-0.00680519	0.0332274	0.658531
ADAM15	-0.11571	-0.0806427	-0.0350668	0.701708
ADAM17	-0.101448	0.0451524	-0.146601	0.461384
ADAM18	0.32193	0.351828	-0.0298986	0.929568
ADAM19	0.169298	0.110591	0.0587061	0.536102
ADAM2	-0.129003	0.00210575	-0.131108	0.205191
ADAM20	0.205034	0.145855	0.0591792	0.184898
ADAM21	0.0126112	-0.041121	0.0537322	0.575621
ADAM22	0.00908698	-0.0510932	0.0601801	0.330915
ADAM23	-0.0316381	0.051189	-0.0828272	0.0930783
ADAM28	0.087116	0.116396	-0.0292801	0.205191
ADAM29	0.0540984	0.0952727	-0.0411742	0.166129
ADAM30	-0.080212	-0.107585	0.0273733	0.536102
ADAM32	0.0155643	0.101882	-0.0863176	0.497997
ADAM33	-0.0650342	-0.111973	0.0469385	0.536102
ADAM7	0.00889359	0.0482401	-0.0393465	0.426326
ADAM8	0.317853	0.218861	0.0989924	0.575621
ADAM9	-0.00856082	-0.0170297	0.00846884	0.882884
ADAMDEC1	0.183557	0.120857	0.0626996	0.250536
ADAMTS1	0.0153167	-0.0503969	0.0657136	0.516825
ADAMTS10	-0.264626	-0.158743	-0.105883	0.330915
ADAMTS12	0.189188	0.161159	0.0280289	0.461384
ADAMTS13	0.0410246	0.0296596	0.0113651	0.836604
ADAMTS14	0.0703674	0.0600865	0.0102808	0.929568
ADAMTS15	0.0991865	0.00198942	0.0971971	0.205191
ADAMTS16	0.157179	0.122764	0.0344152	0.461384
ADAMTS17	0.0245747	0.0198058	0.0047689	0.836604
ADAMTS18	0.151893	0.102242	0.0496507	0.166129
ADAMTS19	0.241112	0.114399	0.126713	0.0930783
ADAMTS2	0.0244561	0.103372	-0.0789155	0.497997
ADAMTS20	-0.031007	-0.0722558	0.0412488	0.497997
ADAMTS3	-0.187472	-0.166957	-0.0205152	0.497997
ADAMTS4	-0.276473	-0.133104	-0.143369	0.0144687
ADAMTS5	0.148172	0.0773751	0.0707968	0.227057
ADAMTS6	0.0963266	0.030832	0.0654946	0.575621
ADAMTS8	0.106199	0.0910557	0.0151435	0.790882
ADAMTS9	-0.14234	-0.0457528	-0.0965868	0.105135
ADAMTSL1	0.149419	0.146447	0.00297199	0.836604
ADAMTSL2	0.0888623	0.0499411	0.0389212	0.976496
ADAMTSL3	0.0822336	0.0882063	-0.00597276	0.836604
ADAMTSL4	-0.2652	-0.269429	0.0042283	0.836604
ADAMTSL5	-0.225065	-0.179942	-0.0451223	0.302448
ADAP1	0.040883	0.013353	0.0275301	0.701708
ADAP2	-0.172105	-0.22266	0.0505542	0.536102
ADAR	-0.521236	-0.611671	0.0904348	0.882884
ADARB1	0.0594776	0.0147237	0.0447539	0.976496
ADARB2	0.137026	0.0589615	0.0780643	0.36106
ADAT1	0.0483904	-0.0432484	0.0916389	0.118399
ADAT2	-0.098826	-0.0462811	-0.0525449	0.616465
ADAT3	-0.197126	-0.429726	0.2326	0.0554822
ADCK1	0.0374122	0.116288	-0.0788763	0.105135
ADCK2	-0.214009	-0.123693	-0.0903164	0.227057
ADCK5	0.0769356	0.0072672	0.0696684	0.658531
ADCY1	-0.00120821	0.044075	-0.0452832	0.227057
ADCY10	0.123826	0.0472528	0.0765731	0.745869
ADCY2	0.145677	0.149169	-0.0034917	1
ADCY3	0.00880601	-0.0671333	0.0759393	0.461384
ADCY4	-0.0590721	-0.0810722	0.0220001	0.929568
ADCY5	0.127661	0.144715	-0.0170539	0.575621
ADCY6	-0.0827785	-0.0932739	0.0104955	0.426326
ADCY7	0.319873	0.161279	0.158594	0.36106
ADCY8	-0.0881492	-0.0749471	-0.0132021	1
ADCY9	0.0417985	0.0766444	-0.0348459	0.461384
ADCYAP1	0.206814	0.205298	0.00151609	0.745869
ADCYAP1R1	0.0218499	0.0374655	-0.0156156	0.929568
ADD1	0.0503875	-0.0149756	0.065363	0.132942
ADD2	0.00264925	-0.050734	0.0533833	0.426326
ADD3	0.0190172	0.0491078	-0.0300906	0.745869
ADGRA1	0.0552405	0.026321	0.0289194	0.461384
ADGRA2	0.217803	0.101395	0.116408	0.227057
ADGRA3	-0.0900389	-0.0892668	-0.000772097	0.701708
ADGRB1	0.0656925	0.0735427	-0.0078502	0.836604
ADGRB2	-0.00260242	-0.0798459	0.0772435	0.426326
ADGRB3	0.0571263	-0.0468234	0.10395	0.14883
ADGRD1	-0.0509899	0.0187616	-0.0697515	0.426326
ADGRE1	-0.0683332	-0.0400873	-0.0282459	0.461384
ADGRE2	-0.221937	-0.0935055	-0.128431	0.14883
ADGRE3	-0.0531573	0.0192884	-0.0724457	0.836604
ADGRE5	0.133941	0.0844191	0.0495215	0.536102
ADGRF1	0.106227	0.0248502	0.0813766	0.0420594
ADGRF3	0.152499	0.0446181	0.107881	0.118399
ADGRF4	-0.00616787	0.057053	-0.0632209	0.330915
ADGRF5	-0.155497	-0.136919	-0.0185782	0.745869
ADGRG1	-0.112594	-0.103008	-0.00958579	0.426326
ADGRG2	0.137951	0.151213	-0.0132614	0.658531
ADGRG3	-0.0648217	-0.142516	0.0776948	0.105135
ADGRG4	0.145559	0.004879	0.14068	0.0930783
ADGRG5	0.0636567	0.000654878	0.0630018	0.616465
ADGRG6	0.282873	0.191915	0.0909582	0.118399
ADGRG7	0.0611924	-0.0465265	0.107719	0.048381
ADGRL1	0.18015	-0.00884147	0.188991	0.0722992
ADGRL2	-0.018031	-0.0428983	0.0248673	0.745869
ADGRL3	0.00964698	-0.047802	0.057449	0.302448
ADGRL4	0.0368168	0.0256972	0.0111197	0.536102
ADGRV1	0.040226	-0.017396	0.057622	0.330915
ADH1A	0.0702865	0.0664278	0.00385867	0.976496
ADH1B	0.0869995	0.0640876	0.0229119	0.836604
ADH4	0.0723121	0.122088	-0.0497755	0.392872
ADH5	-0.362083	-0.314663	-0.0474197	0.658531
ADH6	-0.0221076	-0.0241806	0.002073	0.616465
ADH7	0.236893	0.121144	0.115749	0.616465
ADHFE1	-0.0897933	-0.172883	0.0830902	0.275659
ADI1	0.0364343	0.114222	-0.0777879	0.14883
ADIG	0.0214624	0.0254447	-0.00398233	0.658531
ADIPOQ	0.022284	0.130761	-0.108477	0.0821572
ADIPOR1	0.173216	0.0823383	0.0908782	0.048381
ADIPOR2	0.124144	0.0476088	0.0765351	0.250536
ADIRF	-0.203674	-0.0933523	-0.110322	0.118399
ADK	-0.0445706	-0.0456539	0.00108337	1
ADM	0.0639779	0.0533131	0.0106648	0.658531
ADM2	0.0878253	0.0896026	-0.0017773	0.976496
ADM5	-0.25488	-0.108549	-0.146331	0.0144687
ADNP	-0.133108	-0.18019	0.0470821	1
ADNP2	0.000606986	-0.0528666	0.0534736	0.616465
ADO	-0.0438419	-0.0610525	0.0172107	0.461384
ADORA1	-0.180452	-0.0946685	-0.0857832	0.575621
ADORA2A	-0.0701225	-0.0786705	0.00854796	0.536102
ADORA2B	0.0867814	0.0578352	0.0289462	0.882884
ADPGK	-0.0439423	-0.0686153	0.024673	0.790882
ADPRH	-0.119854	-0.065766	-0.0540885	0.461384
ADPRHL1	-0.0131334	-0.0707469	0.0576135	0.426326
ADPRM	0.0061163	0.0430748	-0.0369585	0.392872
ADPRS	-0.324533	-0.225004	-0.0995294	0.132942
ADRA1A	0.176505	0.100289	0.0762156	0.302448
ADRA1B	0.0330817	0.0540175	-0.0209358	0.745869
ADRA1D	0.0516229	0.0420674	0.00955548	0.330915
ADRA2A	0.0137065	-0.0125656	0.0262721	0.658531
ADRA2B	-0.110242	-0.0623384	-0.0479038	0.302448
ADRA2C	0.111524	0.00446969	0.107054	0.166129
ADRB1	0.178365	0.133818	0.0445467	0.536102
ADRB2	0.140617	0.00768668	0.13293	0.0930783
ADRB3	0.102609	0.0513758	0.0512327	0.205191
ADRM1	-0.349487	-0.384375	0.034888	0.790882
ADSL	-1.02931	-0.716798	-0.312515	0.250536
ADSS1	0.00911693	0.0176698	-0.00855286	0.882884
ADSS2	-0.587364	-0.420807	-0.166557	0.250536
ADTRP	0.180756	0.0867428	0.0940132	0.0930783
AEBP1	-0.0914659	-0.115045	0.0235789	0.701708
AEBP2	0.0538337	0.0408918	0.012942	0.658531
AEN	-0.0433957	-0.0527586	0.00936295	0.882884
AFAP1	0.194376	0.134451	0.0599241	0.118399
AFAP1L1	0.0898511	-0.0466519	0.136503	0.790882
AFAP1L2	0.113789	0.039529	0.0742599	0.302448
AFDN	-0.00137269	-0.0956559	0.0942832	0.0930783
AFF1	0.0869429	0.0716997	0.0152432	1
AFF2	0.293176	0.12158	0.171596	0.00873673
AFF3	-0.117887	-0.138038	0.0201509	0.836604
AFF4	-0.102262	-0.0704477	-0.0318143	0.658531
AFG1L	0.0129252	0.0718193	-0.0588941	0.745869
AFG3L2	-0.916859	-1.06376	0.146899	0.536102
AFM	0.110724	0.0926211	0.0181033	0.882884
AFMID	0.0238794	-0.0180795	0.041959	0.882884
AFP	0.00575906	-0.0311715	0.0369306	0.36106
AFTPH	0.0610287	0.0477548	0.0132739	0.836604
AGA	0.131666	0.0767384	0.0549271	0.929568
AGAP1	0.137006	0.0184566	0.118549	0.132942
AGAP2	-0.267436	-0.380694	0.113258	0.118399
AGAP3	-0.0868147	0.000637625	-0.0874523	0.184898
AGAP6	-0.522195	-0.601762	0.0795668	0.536102
AGBL1	0.150763	0.0759271	0.0748361	0.105135
AGBL2	0.034732	0.0359343	-0.00120228	0.976496
AGBL3	-0.334113	-0.175733	-0.15838	0.658531
AGBL4	-0.0747795	-0.0800339	0.0052544	0.929568
AGBL5	-0.0202702	-0.0499075	0.0296373	0.461384
AGER	0.0558775	0.0877299	-0.0318524	0.976496
AGFG1	0.0170649	0.0456821	-0.0286172	0.461384
AGFG2	-0.0455433	-0.0472163	0.00167305	0.976496
AGGF1	-0.0617813	0.141466	-0.203247	0.00733777
AGK	-0.12763	0.0281194	-0.15575	0.0634314
AGL	-0.231964	-0.115414	-0.11655	0.929568
AGMAT	0.0492155	-0.00572815	0.0549437	0.275659
AGMO	0.111694	0.0554197	0.0562745	0.0722992
AGO1	-0.0871052	-0.206438	0.119333	0.497997
AGO2	-0.104123	-0.0138967	-0.0902261	0.658531
AGO3	-0.137814	-0.144873	0.00705892	0.575621
AGO4	-0.0527031	-0.0274731	-0.02523	0.745869
AGPAT1	-0.0131454	-0.0819801	0.0688347	0.36106
AGPAT2	-0.019827	-0.0994573	0.0796302	0.302448
AGPAT3	0.0736829	0.0289503	0.0447326	0.461384
AGPAT4	0.148898	0.117293	0.0316043	0.701708
AGPAT5	0.219641	0.0940762	0.125565	0.118399
AGPS	-0.0226237	0.0448526	-0.0674763	0.166129
AGR2	-0.0213199	-0.00560356	-0.0157164	0.745869
AGR3	-0.0694315	0.020669	-0.0901005	0.976496
AGRN	-0.0700465	-0.134067	0.0640206	0.392872
AGRP	-0.0911239	-0.0571755	-0.0339484	0.497997
AGT	0.186839	0.0707233	0.116116	0.0554822
AGTPBP1	0.136786	0.108751	0.0280344	0.616465
AGTR1	-0.0755667	-0.0506033	-0.0249635	0.790882
AGTR2	0.0440013	0.0210094	0.0229919	0.882884
AGTRAP	0.0619905	0.0334373	0.0285532	0.976496
AGXT	0.156979	0.103613	0.0533662	0.330915
AGXT2	0.169003	0.136294	0.0327092	0.536102
AHCTF1	-0.826807	-0.997897	0.17109	0.184898
AHCY	-0.532372	-0.673697	0.141325	0.302448
AHCYL1	-0.42968	-0.403336	-0.0263442	0.882884
AHCYL2	-0.211194	-0.0488608	-0.162334	0.0634314
AHDC1	-0.0979474	-0.119946	0.0219985	0.976496
AHI1	0.0114657	0.00241305	0.00905262	0.461384
AHNAK	-0.278369	-0.320935	0.0425658	0.461384
AHNAK2	0.0599992	0.113355	-0.0533558	0.976496
AHR	-0.0655381	0.0721663	-0.137704	0.0821572
AHRR	-0.031517	-0.0407742	0.00925716	0.836604
AHSA1	-0.185928	-0.0874047	-0.0985238	0.302448
AHSG	0.0359216	0.0327097	0.00321193	0.836604
AHSP	0.024123	0.0303082	-0.00618513	0.658531
AICDA	0.162398	0.109894	0.0525034	0.497997
AIDA	0.133147	0.0774608	0.0556863	0.392872
AIF1	-0.205049	-0.176781	-0.0282686	0.658531
AIF1L	-0.186308	-0.0715969	-0.114711	0.250536
AIFM1	-0.27417	-0.241716	-0.0324543	0.461384
AIFM2	0.0544976	0.0121011	0.0423965	0.575621
AIFM3	-0.0207209	-0.0559245	0.0352037	0.790882
AIG1	0.0037497	0.0855767	-0.081827	0.184898
AIM2	0.209482	0.172361	0.0371211	0.302448
AIMP1	-0.0457386	-0.0697346	0.023996	0.745869
AIMP2	-0.13526	-0.189419	0.0541594	0.392872
AIP	-0.155922	-0.0639062	-0.0920159	0.275659
AIPL1	-0.0744563	-0.0826199	0.00816357	0.929568
AIRE	0.0599012	0.179193	-0.119292	0.132942
AJAP1	0.0482489	0.044169	0.00407985	0.976496
AJM1	-0.209549	-0.258323	0.0487739	0.575621
AJUBA	0.19486	-0.0428949	0.237755	0.0103694
AK1	-0.240595	-0.208171	-0.0324247	0.302448
AK2	-0.294249	-0.299198	0.00494951	1
AK3	-0.0942497	-0.124583	0.0303335	0.745869
AK4	-0.358049	-0.56186	0.203811	0.0930783
AK5	0.0923851	0.119978	-0.0275931	0.745869
AK6	-1.68618	-1.19266	-0.493518	0.0554822
AK7	0.0195621	0.0608666	-0.0413045	0.426326
AK8	-0.148027	-0.0957925	-0.0522342	0.575621
AK9	0.0921644	0.0876047	0.00455967	1
AKAIN1	0.187399	0.157428	0.0299714	0.745869
AKAP1	0.0413963	-0.0656219	0.107018	0.0554822
AKAP10	-0.0562593	-0.0511574	-0.00510185	0.882884
AKAP11	0.0709759	0.0444715	0.0265044	1
AKAP12	0.00882543	-0.0399974	0.0488229	0.392872
AKAP13	0.0283251	0.0370365	-0.0087114	0.929568
AKAP14	0.0507734	0.041575	0.0091984	0.836604
AKAP3	-0.122525	-0.119038	-0.00348693	0.976496
AKAP4	0.00198736	0.0115384	-0.00955104	0.575621
AKAP5	0.040391	0.0367925	0.00359855	0.616465
AKAP6	-0.0428578	-0.0114844	-0.0313734	0.658531
AKAP7	0.0423526	0.0770236	-0.034671	0.836604
AKAP8	-0.0720657	0.0295554	-0.101621	0.0634314
AKAP8L	-0.220999	-0.181459	-0.0395406	0.616465
AKAP9	-0.0406444	-0.0282717	-0.0123728	0.790882
AKIP1	-0.2203	-0.186408	-0.0338916	0.701708
AKIRIN1	-0.413935	-0.374824	-0.0391109	0.701708
AKIRIN2	-1.05369	-1.08163	0.0279476	0.790882
AKNA	-0.0763431	-0.0975607	0.0212176	0.882884
AKNAD1	-0.223518	-0.113723	-0.109795	0.790882
AKR1A1	0.135853	0.111937	0.0239153	0.701708
AKR1B1	0.091072	0.0549286	0.0361434	0.616465
AKR1B10	0.184035	0.144394	0.0396413	0.497997
AKR1B15	-0.280245	-0.285303	0.00505784	0.461384
AKR1C2	-0.0574675	0.0149536	-0.0724211	0.184898
AKR1C3	-0.0317108	0.0496061	-0.081317	0.275659
AKR1C4	0.145852	0.112964	0.0328873	0.205191
AKR1D1	-0.133667	-0.13376	9.33e-05	0.701708
AKR1E2	0.289845	0.166036	0.12381	0.0144687
AKR7A2	0.0221833	0.0160601	0.00612323	0.976496
AKR7A3	-0.010145	-0.224679	0.214533	0.790882
AKT1	-0.420008	-0.0906835	-0.329324	0.00614319
AKT1S1	0.114342	0.0741736	0.040168	0.575621
AKT2	-0.134686	-0.0445715	-0.090114	0.132942
AKT3	0.153495	0.108224	0.0452705	0.302448
AKTIP	-0.335287	-0.347652	0.0123648	0.701708
ALAD	-0.0291477	-0.0906843	0.0615365	0.745869
ALAS1	-0.070725	-0.129147	0.0584218	1
ALAS2	-0.000465482	0.101789	-0.102255	0.0821572
ALB	0.245791	0.0952939	0.150497	0.0554822
ALCAM	-0.0395511	-0.124191	0.0846398	0.227057
ALDH16A1	0.00263789	0.002271	0.000366893	0.790882
ALDH18A1	0.122343	0.0378219	0.0845209	0.205191
ALDH1A1	0.136829	0.0312102	0.105619	0.0271254
ALDH1A2	-0.0530418	-0.047847	-0.00519482	0.929568
ALDH1A3	0.335456	0.199252	0.136204	0.0144687
ALDH1B1	-0.0685824	0.00629994	-0.0748823	0.497997
ALDH1L1	0.0173354	0.0119709	0.0053645	0.836604
ALDH1L2	-0.0769489	-0.0239054	-0.0530435	0.575621
ALDH2	-0.0232775	-0.00604097	-0.0172365	0.658531
ALDH3A1	0.092134	0.0531952	0.0389387	0.929568
ALDH3A2	0.0877723	0.0147459	0.0730264	0.250536
ALDH3B2	0.0553039	0.0872832	-0.0319793	0.250536
ALDH4A1	-0.157546	-0.0342495	-0.123297	0.330915
ALDH5A1	0.00289293	-0.0273058	0.0301987	0.461384
ALDH6A1	0.0802378	-0.0869973	0.167235	0.14883
ALDH7A1	0.183789	-0.0247676	0.208557	0.105135
ALDH8A1	0.0110216	0.0384427	-0.0274211	0.275659
ALDH9A1	-0.162258	-0.182814	0.0205561	0.976496
ALDOA	-0.957155	-1.16642	0.209261	0.302448
ALDOB	0.00959091	-0.0185393	0.0281302	0.461384
ALDOC	-0.323504	-0.46146	0.137956	0.302448
ALG1	-1.03921	-0.83133	-0.207885	0.929568
ALG10	-0.330276	-0.151965	-0.178311	0.00614319
ALG10B	-0.273499	-0.294287	0.0207873	0.790882
ALG11	-1.04475	-1.43026	0.38551	0.0634314
ALG12	-0.182702	-0.0677572	-0.114944	0.302448
ALG13	-0.988159	-0.92362	-0.0645384	0.790882
ALG14	-0.815397	-0.969961	0.154565	0.048381
ALG2	-1.42155	-1.382	-0.0395512	0.836604
ALG3	-0.138889	0.0172893	-0.156178	0.0314933
ALG5	-0.398669	-0.219836	-0.178833	0.0821572
ALG6	-0.133942	-0.164178	0.0302358	0.658531
ALG8	-0.301796	-0.221341	-0.0804548	0.497997
ALG9	-0.0557705	-0.0248248	-0.0309457	0.790882
ALK	-0.0820295	-0.0443099	-0.0377196	0.575621
ALKAL1	-0.206598	-0.123303	-0.0832948	0.132942
ALKAL2	0.114303	0.106095	0.00820768	0.882884
ALKBH1	-0.00435721	-0.0630891	0.0587319	0.392872
ALKBH2	0.00409967	0.0211664	-0.0170667	0.426326
ALKBH3	-0.197015	-0.127295	-0.0697204	0.330915
ALKBH4	-0.215742	-0.177379	-0.0383632	0.330915
ALKBH5	-0.177664	-0.126153	-0.0515114	0.426326
ALKBH6	-0.0393986	-0.0815209	0.0421223	0.658531
ALKBH7	-0.247725	-0.141352	-0.106373	0.330915
ALKBH8	0.0443082	0.0156642	0.028644	0.36106
ALLC	-0.124163	-0.0458185	-0.078345	0.426326
ALMS1	-0.177558	-0.164978	-0.0125792	0.330915
ALOX12	0.156794	0.168205	-0.0114116	0.836604
ALOX12B	0.0502566	0.0440837	0.00617285	0.929568
ALOX15	0.0160727	0.0393091	-0.0232364	0.745869
ALOX15B	0.107455	0.058644	0.0488111	0.275659
ALOX5	-0.233424	-0.158494	-0.0749295	0.302448
ALOX5AP	0.0594603	0.0984824	-0.0390222	0.426326
ALOXE3	-0.107959	-0.104007	-0.00395206	0.882884
ALPG	0.0708254	0.0188607	0.0519648	0.882884
ALPI	0.188892	0.0572335	0.131659	0.166129
ALPK1	-0.00941843	0.0401571	-0.0495755	0.132942
ALPK2	0.00341108	0.198236	-0.194825	0.0554822
ALPL	0.0386677	0.0581232	-0.0194555	0.497997
ALPP	0.180849	0.247683	-0.0668349	0.302448
ALS2	0.0661439	0.0822183	-0.0160744	0.976496
ALS2CL	-0.0409267	-0.110863	0.0699367	0.976496
ALX1	0.0331099	0.0118958	0.0212141	0.275659
ALX3	-0.211318	-0.376183	0.164866	0.14883
ALX4	0.0451345	0.0520343	-0.00689974	0.497997
ALYREF	-1.42892	-1.1888	-0.240118	0.184898
AMACR	-0.00171363	0.0101127	-0.0118263	0.929568
AMBN	0.0463892	-0.0882857	0.134675	0.0554822
AMBP	-0.0195005	0.0659185	-0.0854191	0.184898
AMBRA1	-0.0556037	-0.140544	0.0849407	0.426326
AMD1	-0.569341	-0.46575	-0.103592	0.426326
AMDHD1	-0.210271	-0.101397	-0.108874	0.14883
AMDHD2	-0.105661	-0.135726	0.0300652	0.575621
AMELX	0.0199896	0.00173229	0.0182573	0.976496
AMER1	0.0506615	0.0964185	-0.045757	0.790882
AMER2	-0.0258274	-0.0965212	0.0706937	0.227057
AMER3	-0.153554	-0.216455	0.0629015	0.497997
AMFR	-0.19678	-0.16841	-0.0283706	0.701708
AMH	0.175967	0.0394903	0.136477	0.132942
AMHR2	0.0194101	-0.00156173	0.0209718	0.575621
AMIGO1	-0.137998	-0.125817	-0.0121805	0.929568
AMIGO2	0.0246163	0.12612	-0.101504	0.0232906
AMIGO3	0.0104293	-0.0730638	0.0834931	0.227057
AMMECR1	0.00330844	0.073643	-0.0703345	0.205191
AMMECR1L	-0.0962265	-0.15196	0.0557335	0.392872
AMN	0.0183727	-0.0475684	0.0659411	0.536102
AMN1	0.218046	0.167706	0.0503398	0.836604
AMOT	0.104781	0.0655382	0.0392431	0.302448
AMOTL1	0.0983035	0.0239912	0.0743123	0.205191
AMOTL2	0.0411618	0.0374917	0.00367016	0.929568
AMPD1	-0.114591	-0.153478	0.0388867	0.836604
AMPD2	-0.0895368	-0.0931106	0.00357383	0.976496
AMPD3	-0.0870921	-0.0338175	-0.0532746	0.790882
AMPH	-0.0208905	0.0567728	-0.0776633	0.0722992
AMT	-0.0477238	0.0480378	-0.0957615	0.302448
AMTN	-0.0206084	0.0527823	-0.0733906	0.227057
AMY2A	-0.378173	-0.403009	0.0248363	0.575621
AMZ1	0.101287	0.0495931	0.0516943	0.658531
AMZ2	0.0581134	0.0234481	0.0346653	0.701708
ANAPC1	-1.92875	-1.90461	-0.0241431	0.882884
ANAPC10	-1.52844	-1.51346	-0.0149788	0.882884
ANAPC11	-1.44234	-1.57368	0.131345	0.36106
ANAPC13	-0.207049	-0.267148	0.0600985	0.575621
ANAPC15	-0.344623	-0.487326	0.142703	0.426326
ANAPC16	-0.087214	-0.0603055	-0.0269085	0.461384
ANAPC2	-1.29653	-1.44637	0.149838	0.275659
ANAPC4	-1.26823	-1.35714	0.088915	0.658531
ANAPC5	-1.18381	-1.30909	0.125273	0.701708
ANAPC7	-0.075262	-0.205046	0.129784	0.227057
ANG	-0.187814	-0.155726	-0.0320884	0.426326
ANGEL1	-0.0343106	-0.0054434	-0.0288672	0.976496
ANGEL2	-0.245365	-0.0925511	-0.152814	0.0232906
ANGPT1	-0.0357529	-0.0171941	-0.0185588	0.836604
ANGPT2	0.0705761	0.101898	-0.0313218	0.575621
ANGPT4	0.267649	0.283976	-0.0163267	0.836604
ANGPTL1	-0.0861374	0.00501409	-0.0911515	0.302448
ANGPTL2	0.0315845	-0.018383	0.0499675	0.302448
ANGPTL3	0.0933992	0.101003	-0.00760412	1
ANGPTL4	-0.0247288	-0.0266443	0.00191554	0.929568
ANGPTL5	-0.11134	-0.0327433	-0.0785965	0.836604
ANGPTL6	-0.126124	-0.115916	-0.0102071	0.701708
ANGPTL7	-0.00797074	0.0130306	-0.0210013	0.658531
ANGPTL8	-0.0860748	-0.0141866	-0.0718883	0.536102
ANHX	-0.1591	-0.0807783	-0.0783216	0.36106
ANK1	0.151368	0.0785358	0.072832	0.745869
ANK2	0.113683	0.0625635	0.0511198	0.330915
ANK3	0.00989094	-0.0358464	0.0457374	0.330915
ANKAR	0.0997398	0.0926873	0.00705252	0.882884
ANKDD1A	-0.107664	-0.11212	0.00445627	0.836604
ANKDD1B	0.132543	0.14985	-0.0173069	1
ANKEF1	0.183032	0.100946	0.0820865	0.105135
ANKFN1	0.0946333	0.0668999	0.0277334	0.616465
ANKFY1	-0.0804107	-0.0772408	-0.0031699	0.790882
ANKH	0.133434	0.102182	0.0312516	0.461384
ANKHD1	-0.112767	-0.110331	-0.00243639	0.790882
ANKIB1	-0.132208	-0.0625454	-0.0696623	0.166129
ANKK1	0.116642	0.0477765	0.0688653	0.392872
ANKLE1	-0.051572	-0.136092	0.0845203	0.0930783
ANKLE2	-2.29698	-2.40145	0.104467	0.497997
ANKMY1	0.125635	-0.004372	0.130007	0.0314933
ANKMY2	-0.250072	-0.219853	-0.0302194	0.836604
ANKRA2	-0.393121	-0.197946	-0.195175	0.392872
ANKRD1	-0.0523697	-0.0845204	0.0321507	0.745869
ANKRD10	0.0648201	0.030875	0.0339452	0.790882
ANKRD11	-0.334033	-0.306118	-0.0279145	0.536102
ANKRD12	0.0735787	0.0954594	-0.0218806	0.616465
ANKRD13A	0.0641297	-0.0611358	0.125265	0.048381
ANKRD13B	-0.17147	-0.099074	-0.0723956	0.36106
ANKRD13C	0.18719	-0.0163635	0.203553	0.00733777
ANKRD13D	0.00277823	-0.0244626	0.0272408	0.790882
ANKRD16	0.0431064	0.0433404	-0.000234041	1
ANKRD17	-0.137249	-0.222556	0.0853074	0.616465
ANKRD18A	0.0225813	0.0210054	0.00157592	0.836604
ANKRD2	0.000608953	0.0649674	-0.0643584	0.275659
ANKRD22	-0.0952828	-0.142868	0.0475847	0.392872
ANKRD23	-0.220924	-0.203947	-0.0169769	0.497997
ANKRD24	-0.123066	-0.104479	-0.0185876	0.392872
ANKRD26	0.301153	0.202334	0.0988191	0.14883
ANKRD27	-0.0545399	-0.0752267	0.0206869	0.836604
ANKRD28	-0.0311514	-0.0425438	0.0113924	0.929568
ANKRD29	0.265521	0.137416	0.128105	0.0821572
ANKRD30A	0.10031	0.0321209	0.0681893	0.105135
ANKRD30B	0.105096	0.0664816	0.0386147	0.14883
ANKRD31	-0.210613	-0.249476	0.0388629	0.616465
ANKRD33	-0.0450038	-0.0338392	-0.0111645	0.790882
ANKRD33B	0.0319273	-0.0286813	0.0606085	0.461384
ANKRD34A	-0.0842847	-0.166476	0.0821908	0.302448
ANKRD34B	0.0191287	-0.174236	0.193365	0.330915
ANKRD34C	0.0426906	-0.0165656	0.0592563	1
ANKRD35	-0.114612	-0.190478	0.0758657	0.250536
ANKRD37	0.0736546	0.0861098	-0.0124552	0.929568
ANKRD39	-0.354924	-0.226576	-0.128347	0.118399
ANKRD40	-0.00105553	-0.114943	0.113888	0.166129
ANKRD42	0.209883	0.111553	0.0983296	0.497997
ANKRD44	0.0161463	0.0853675	-0.0692212	0.250536
ANKRD45	0.109736	0.12626	-0.0165236	0.616465
ANKRD46	0.0440342	0.109787	-0.0657529	0.426326
ANKRD49	-0.185072	-0.168767	-0.0163053	0.616465
ANKRD50	-0.0226668	0.0907259	-0.113393	0.227057
ANKRD52	-0.248554	-0.250141	0.00158671	0.790882
ANKRD53	-0.177385	-0.0806445	-0.0967401	0.426326
ANKRD54	-0.0958789	-0.207968	0.112089	0.275659
ANKRD55	0.086786	0.0447001	0.042086	0.461384
ANKRD6	0.00540955	-0.0351932	0.0406027	0.575621
ANKRD61	0.33823	0.17879	0.159439	0.0122681
ANKRD62	0.233121	0.0846551	0.148466	0.00353625
ANKRD65	-0.235531	-0.365963	0.130432	0.250536
ANKRD66	0.291817	0.146801	0.145017	0.118399
ANKRD7	0.195805	0.115098	0.0807067	0.0722992
ANKRD9	0.0765136	-0.0121987	0.0887124	0.575621
ANKS1A	0.0927105	0.0440824	0.0486281	0.790882
ANKS1B	0.0907614	0.0847998	0.00596157	0.790882
ANKS3	0.0406245	-0.0350601	0.0756846	0.658531
ANKS4B	0.205315	0.14835	0.0569649	0.14883
ANKS6	-0.0690836	-0.179323	0.110239	0.205191
ANKZF1	0.0692338	-0.0675927	0.136826	0.0199355
ANLN	-0.527315	-0.602182	0.0748667	0.976496
ANO1	-0.108203	-0.122358	0.0141551	0.790882
ANO10	0.00293917	0.0306061	-0.0276669	0.36106
ANO3	-0.0573023	-0.0204338	-0.0368685	0.275659
ANO4	-0.0028563	-0.0271676	0.0243113	0.701708
ANO5	-0.100603	-0.0890339	-0.0115687	1
ANO6	-0.0811152	-0.0245531	-0.0565621	0.166129
ANO7	0.107682	0.103885	0.00379625	1
ANO8	-0.102559	-0.122395	0.0198362	0.701708
ANO9	0.12906	0.0990471	0.0300126	0.616465
ANOS1	0.250789	0.18379	0.0669994	0.166129
ANP32A	-0.0046491	-0.0562677	0.0516186	0.227057
ANP32B	-0.0162872	-0.0821172	0.0658299	0.302448
ANP32D	-0.0103375	-0.0882575	0.0779201	0.275659
ANP32E	-0.467772	-0.298091	-0.169681	0.0364513
ANPEP	-0.0325929	0.100941	-0.133534	0.0144687
ANTKMT	-0.221503	-0.183039	-0.0384636	0.36106
ANTXR1	0.0237697	0.0136334	0.0101363	0.929568
ANTXR2	0.0272159	0.103951	-0.0767353	0.275659
ANTXRL	-0.169915	-0.288036	0.118122	0.184898
ANXA1	0.140387	0.0959593	0.0444272	0.976496
ANXA10	0.128025	0.110549	0.0174758	0.701708
ANXA11	0.116003	0.0751096	0.0408934	0.227057
ANXA13	0.0125905	-0.061232	0.0738226	0.205191
ANXA2	0.0237405	0.046725	-0.0229845	0.658531
ANXA2R	-0.230946	-0.158791	-0.0721543	0.536102
ANXA3	0.132814	0.0810542	0.0517597	0.882884
ANXA4	0.0820511	0.0674084	0.0146426	0.882884
ANXA5	0.151662	0.111827	0.039835	0.701708
ANXA6	0.104097	0.120606	-0.0165086	0.976496
ANXA7	-0.0205124	-0.088027	0.0675147	0.575621
ANXA9	-0.241713	-0.197158	-0.0445555	0.392872
AOAH	-0.0432499	0.0688332	-0.112083	0.0722992
AOC1	-0.053807	-0.0940253	0.0402183	0.250536
AOC2	-0.152687	-0.178767	0.0260795	0.976496
AOC3	-0.129276	-0.147507	0.0182304	0.882884
AOPEP	-0.00898249	0.0613399	-0.0703224	0.0634314
AOX1	0.0827295	0.047374	0.0353554	0.250536
AP1AR	0.0542968	0.16511	-0.110813	0.00512668
AP1B1	-0.0765055	-0.13898	0.0624746	0.302448
AP1G1	-0.206257	-0.0922923	-0.113965	0.105135
AP1G2	-0.314452	-0.246236	-0.0682164	0.929568
AP1M1	-0.0265295	-0.044379	0.0178495	0.882884
AP1M2	-0.0160236	0.00691905	-0.0229427	0.745869
AP1S1	0.042167	0.0188063	0.0233607	0.790882
AP1S2	-0.204611	-0.173567	-0.0310437	0.701708
AP1S3	-0.0100869	-0.0133813	0.00329444	0.976496
AP2A1	0.0170561	0.0523046	-0.0352485	0.497997
AP2A2	0.00630915	0.0755027	-0.0691936	0.250536
AP2B1	-0.0190809	-0.0815051	0.0624242	0.836604
AP2M1	-0.313317	-0.455545	0.142228	0.426326
AP2S1	-0.357374	-0.439642	0.0822677	0.536102
AP3B1	-0.340324	-0.234784	-0.10554	0.132942
AP3B2	0.0159019	-0.0395539	0.0554558	0.205191
AP3D1	-0.0102301	-0.0733712	0.0631411	0.790882
AP3M1	-0.227898	-0.236644	0.00874546	0.882884
AP3M2	-0.22266	-0.206379	-0.016281	0.882884
AP3S1	-0.251289	-0.329062	0.0777725	0.132942
AP3S2	-0.0688661	-0.0262116	-0.0426545	0.658531
AP4B1	-0.125382	-0.00778648	-0.117595	0.118399
AP4E1	-0.0583692	-0.0198379	-0.0385314	0.392872
AP4M1	0.091883	0.0399689	0.051914	0.227057
AP4S1	-0.11889	-0.10272	-0.0161706	1
AP5B1	-0.171493	-0.137782	-0.0337117	0.790882
AP5M1	0.0116149	0.0492287	-0.0376138	0.461384
AP5S1	0.069931	0.0108086	0.0591224	0.330915
AP5Z1	-0.0229023	-0.085047	0.0621447	0.227057
APAF1	0.0457427	0.105762	-0.0600192	0.250536
APBA1	0.032046	-0.0736464	0.105692	0.250536
APBA2	-0.247441	-0.148058	-0.099383	0.227057
APBA3	0.13339	0.149026	-0.0156365	0.929568
APBB1	0.142708	-0.0420641	0.184772	0.00240802
APBB1IP	-0.0179539	0.00934267	-0.0272966	0.882884
APBB2	0.240794	0.0888408	0.151953	0.36106
APBB3	-0.0183065	-0.0271819	0.00887543	0.929568
APC	-0.327307	-0.380072	0.0527643	0.790882
APC2	-0.177379	-0.170315	-0.00706409	0.976496
APCDD1	0.209402	0.185938	0.0234639	0.536102
APCDD1L	0.110807	0.0484903	0.0623164	0.461384
APCS	-0.213738	-0.0953079	-0.11843	0.0930783
APEH	-0.255938	-0.247575	-0.00836322	0.836604
APEX1	-0.20492	-0.130843	-0.0740767	0.184898
APEX2	-0.228622	-0.148893	-0.079729	0.302448
APH1A	-0.252439	-0.331568	0.0791281	0.250536
APH1B	-0.0775918	-0.102435	0.0248433	0.658531
API5	-0.0913183	-0.108283	0.0169647	1
APIP	-0.178485	-0.0846406	-0.0938443	0.227057
APLF	0.104838	0.0747148	0.0301231	0.392872
APLN	-0.0176681	0.0235199	-0.041188	0.575621
APLNR	-0.0648641	0.0227033	-0.0875674	0.0930783
APLP1	-0.244063	-0.237014	-0.00704848	0.745869
APLP2	0.205307	0.118705	0.0866016	0.205191
APMAP	0.0340844	0.0111095	0.0229749	0.836604
APOA1	0.0341707	0.00561573	0.028555	0.836604
APOA2	0.0536231	0.0150898	0.0385333	0.701708
APOA4	0.193867	0.0781866	0.115681	0.166129
APOA5	0.10763	0.0218216	0.0858088	0.227057
APOB	0.0019682	0.024272	-0.0223038	0.701708
APOBEC1	-0.0918563	-0.0736838	-0.0181725	0.790882
APOBEC2	-0.0818483	0.0110024	-0.0928506	0.0821572
APOBEC3A	0.00930282	-0.00290507	0.0122079	0.836604
APOBEC3B	-0.0769775	0.0246858	-0.101663	0.701708
APOBEC3C	-0.00483445	-0.0954132	0.0905787	0.0821572
APOBEC3D	-0.00359081	0.0491871	-0.0527779	0.745869
APOBEC3G	0.252193	0.159712	0.0924806	0.250536
APOBEC3H	-0.0277319	-0.0613783	0.0336464	0.575621
APOBEC4	-0.0393302	-0.0376078	-0.00172238	0.976496
APOBR	-0.106528	-0.0119561	-0.0945717	0.0722992
APOC1	0.0366833	-0.213361	0.250045	0.0554822
APOC2	-0.101311	-0.174988	0.0736774	0.36106
APOC3	0.0640441	0.00992397	0.0541202	0.330915
APOC4	0.0295272	0.011473	0.0180542	0.497997
APOD	0.0739632	0.0186938	0.0552694	0.790882
APOE	-0.08521	-0.0434015	-0.0418085	0.275659
APOF	0.0114484	-0.0550616	0.06651	0.184898
APOH	-0.129918	-0.0771377	-0.0527802	0.205191
APOL1	-0.0181287	0.0098078	-0.0279365	0.536102
APOL2	-0.0609041	-0.0696596	0.0087555	0.745869
APOL3	0.100695	0.0827794	0.0179151	0.745869
APOL5	-0.158297	-0.0517544	-0.106542	0.0420594
APOL6	0.242556	0.115891	0.126665	0.0930783
APOLD1	-0.117194	-0.0563121	-0.0608816	0.426326
APOM	-0.151675	-0.161656	0.00998175	0.790882
APOO	0.153502	0.135135	0.018367	0.36106
APOOL	-0.249088	-0.20125	-0.0478382	0.745869
APP	0.0680759	0.0461589	0.021917	1
APPBP2	-0.04647	-0.00869167	-0.0377783	0.701708
APPL1	-0.0306537	-0.038269	0.0076153	0.929568
APPL2	-0.0668138	-0.0474131	-0.0194007	0.536102
APRT	-0.262141	-0.249916	-0.0122255	0.790882
APTX	0.0786698	0.0475895	0.0310803	0.701708
AQP1	0.0279178	-0.0081938	0.0361116	0.361012
AQP10	-0.305667	-0.249829	-0.0558388	0.330915
AQP11	0.0983296	0.0769105	0.0214191	0.929568
AQP12B	-0.0731686	-0.144331	0.0711625	0.426326
AQP2	-0.0626596	-0.079572	0.0169125	0.701708
AQP3	0.0542794	0.0219058	0.0323735	0.836604
AQP4	0.216529	0.149926	0.0666032	0.250536
AQP5	0.0127734	-0.011229	0.0240024	0.745869
AQP6	-0.191819	-0.116304	-0.0755148	0.275659
AQP7	-0.238041	-0.412784	0.174743	0.330915
AQP8	0.0799879	0.0173454	0.0626425	0.166129
AQP9	-0.0629601	-0.0476949	-0.0152652	0.745869
AQR	-1.66105	-1.56355	-0.097498	0.461384
AR	0.302862	0.209765	0.0930973	0.14883
ARAF	0.11367	0.113649	2.08e-05	0.976496
ARAP1	-0.0385094	-0.0959898	0.0574805	0.330915
ARAP2	-0.0254442	0.0537536	-0.0791978	0.302448
ARAP3	0.0549451	-0.00963193	0.064577	0.105135
ARC	0.129157	0.0508925	0.0782649	0.302448
ARCN1	-0.969849	-1.34446	0.37461	0.0199355
AREG	0.0429187	0.0923935	-0.0494748	0.461384
AREL1	0.0857862	0.0152681	0.0705182	0.536102
ARF1	-0.375701	-0.27033	-0.105371	0.392872
ARF3	-0.318105	-0.221888	-0.0962175	0.105135
ARF4	-0.553134	-0.707101	0.153967	0.227057
ARF5	-0.0732697	0.0484825	-0.121752	0.118399
ARF6	-0.21183	-0.252089	0.0402582	0.976496
ARFGAP1	0.079372	0.0173359	0.0620361	0.836604
ARFGAP2	0.178876	0.102929	0.0759477	0.658531
ARFGAP3	0.0332517	0.111987	-0.078735	0.118399
ARFGEF1	0.0828688	-0.038726	0.121595	0.184898
ARFGEF2	-0.0339014	0.0507321	-0.0846334	0.14883
ARFGEF3	0.0811646	0.0816047	-0.000440097	0.536102
ARFIP1	0.156456	0.0378865	0.11857	0.227057
ARFIP2	0.0531205	0.100708	-0.0475879	0.836604
ARFRP1	-0.591962	-0.575929	-0.016033	0.701708
ARG1	0.293396	0.265057	0.0283385	0.976496
ARG2	0.00270406	0.0615087	-0.0588047	0.118399
ARGFX	0.015685	0.00521106	0.010474	0.836604
ARGLU1	-0.744218	-0.642938	-0.10128	0.275659
ARHGAP1	0.0201113	-0.0749109	0.0950222	0.166129
ARHGAP10	0.0619272	0.0344184	0.0275089	0.701708
ARHGAP11A	-0.578504	-0.376028	-0.202476	0.205191
ARHGAP12	0.108603	0.0460053	0.0625976	0.227057
ARHGAP15	-0.0544277	0.0141	-0.0685277	0.461384
ARHGAP17	0.116378	0.0640452	0.0523324	0.461384
ARHGAP18	0.1848	0.104963	0.0798376	0.250536
ARHGAP19	-0.130539	-0.11588	-0.0146599	0.536102
ARHGAP20	0.191003	0.145653	0.0453502	0.275659
ARHGAP21	-0.120013	-0.134452	0.0144391	1
ARHGAP22	0.00172913	0.0517496	-0.0500205	0.330915
ARHGAP23	-0.115047	-0.179245	0.0641977	0.392872
ARHGAP24	-0.0589915	-0.073375	0.0143836	0.616465
ARHGAP25	0.189603	0.11425	0.0753535	0.392872
ARHGAP26	0.118079	0.106761	0.0113182	0.976496
ARHGAP27	-0.332357	-0.262724	-0.0696324	0.658531
ARHGAP28	0.140189	0.144323	-0.00413428	0.790862
ARHGAP29	-0.260174	-0.354319	0.094145	0.616465
ARHGAP30	-0.237612	-0.221597	-0.0160154	0.929568
ARHGAP31	-0.0832523	-0.0787576	-0.0044947	0.882884
ARHGAP32	0.0542034	0.0228554	0.031348	0.536102
ARHGAP33	-0.0794575	-0.0527323	-0.0267252	0.976496
ARHGAP35	0.0340942	0.123139	-0.0890449	0.14883
ARHGAP36	0.0920967	0.0787218	0.0133749	0.461384
ARHGAP39	0.127688	-0.000967421	0.128655	0.166129
ARHGAP4	0.104199	0.0901756	0.0140238	0.790882
ARHGAP44	0.235924	0.149911	0.0860126	0.0821572
ARHGAP45	0.0748439	-0.00732865	0.0821726	0.302448
ARHGAP5	-0.0614784	-0.117263	0.0557842	0.701708
ARHGAP6	0.0423304	0.0481556	-0.00582516	0.616465
ARHGAP8	-0.0794474	0.0175422	-0.0969896	0.048381
ARHGAP9	-0.0745317	-0.226122	0.15159	0.0420594
ARHGDIA	-0.0636541	-0.0174374	-0.0462167	0.976496
ARHGDIB	0.0170461	0.114914	-0.097868	0.0554822
ARHGDIG	-0.119072	-0.0830781	-0.0359941	0.426326
ARHGEF1	0.0286794	-0.0256026	0.054282	0.882884
ARHGEF10	0.0723768	0.125196	-0.0528187	0.392872
ARHGEF10L	0.137022	0.101333	0.0356893	0.36106
ARHGEF11	-0.293488	-0.23297	-0.0605182	0.105135
ARHGEF12	-0.0244165	0.0236566	-0.048073	0.536102
ARHGEF15	-0.0551586	-0.0104923	-0.0446662	0.616465
ARHGEF16	-0.149916	-0.127136	-0.0227809	0.882884
ARHGEF17	0.0620479	-0.0270008	0.0890488	0.118399
ARHGEF18	0.132619	0.0392449	0.0933739	0.227057
ARHGEF19	0.00420122	-0.0213811	0.0255823	0.575621
ARHGEF2	-0.223114	-0.177893	-0.0452214	0.836604
ARHGEF25	0.00297819	-0.0409415	0.0439197	0.976496
ARHGEF26	0.132671	0.00599839	0.126673	0.0271254
ARHGEF28	-0.0962054	-0.0933288	-0.0028766	0.882884
ARHGEF3	0.0147787	-0.0594654	0.0742441	0.0554822
ARHGEF33	-0.209263	-0.218551	0.00928886	0.929568
ARHGEF37	0.1514	0.15217	-0.000770162	1
ARHGEF38	-0.152708	-0.0707301	-0.0819775	0.184898
ARHGEF39	-0.00211376	0.0125887	-0.0147024	0.745869
ARHGEF4	0.0862638	0.0558113	0.0304524	0.976496
ARHGEF40	0.0755016	-0.106539	0.182041	0.0930783
ARHGEF5	-0.337369	-0.33499	-0.00237917	0.790882
ARHGEF6	0.149756	0.21144	-0.0616843	0.0722992
ARHGEF7	-0.0720312	-0.34289	0.270858	0.250536
ARHGEF9	0.0403975	0.0117847	0.0286128	0.745869
ARID1A	-0.0627014	-0.0478055	-0.014896	0.575621
ARID1B	-0.115066	-0.205739	0.0906721	0.575621
ARID2	-0.757037	-0.565096	-0.191941	0.166129
ARID3A	0.109095	-0.0271467	0.136241	0.0722992
ARID3B	-0.00884709	-0.168845	0.159998	0.0634314
ARID3C	0.149521	0.0340178	0.115503	0.330915
ARID4A	0.0118866	-0.0423231	0.0542097	0.616465
ARID4B	-0.158611	-0.208178	0.0495668	0.330915
ARID5A	-0.316875	-0.235703	-0.0811724	0.227057
ARID5B	-0.0909313	-0.117	0.0260685	0.790882
ARIH1	-1.54251	-1.49257	-0.0499452	0.929568
ARIH2	0.123605	-0.0640036	0.187608	0.0930783
ARL1	-0.196263	-0.0940041	-0.102259	0.745869
ARL10	-0.201049	-0.27996	0.0789111	0.836604
ARL11	-0.0758606	-0.101528	0.0256676	0.790882
ARL13A	0.0787717	0.118127	-0.0393558	0.392872
ARL13B	-0.192033	-0.115952	-0.0760807	0.0930783
ARL14	0.0149196	0.075746	-0.0608264	0.166129
ARL14EP	0.0663827	0.0491883	0.0171944	0.575621
ARL14EPL	0.0669283	0.0362341	0.0306942	0.575621
ARL15	0.0294623	0.00661369	0.0228486	0.929568
ARL2	-1.21374	-1.56469	0.350952	0.105135
ARL2BP	0.0684627	-0.141482	0.209945	0.0199355
ARL3	-0.0626626	-0.0378623	-0.0248003	0.836604
ARL4A	0.0263422	-0.0280819	0.0544241	0.426326
ARL4C	-0.0192461	-0.0487717	0.0295256	0.790882
ARL4D	-0.418239	-0.308879	-0.10936	0.184898
ARL5A	0.108745	0.0818105	0.0269341	0.976496
ARL5B	0.0193721	-0.00100343	0.0203755	0.929568
ARL5C	-0.173471	-0.206262	0.0327912	0.790882
ARL6	0.239107	0.133127	0.10598	0.0420594
ARL6IP1	-0.166954	-0.0644284	-0.102526	0.0122681
ARL6IP5	0.0944685	0.0439793	0.0504892	0.575621
ARL6IP6	-0.195678	-0.204253	0.00857526	0.976496
ARL8A	-0.012364	-0.0225811	0.0102171	0.882884
ARL8B	-0.149734	-0.192168	0.0424336	0.330915
ARL9	0.0152392	-0.0334214	0.0486607	0.250536
ARMC1	-0.0718547	0.00569458	-0.0775493	0.14883
ARMC10	-0.344609	-0.342884	-0.00172573	0.929568
ARMC12	-0.00888255	0.0299318	-0.0388144	0.882884
ARMC2	0.0775452	0.0759832	0.00156196	0.461384
ARMC3	0.170442	0.0937372	0.0767045	0.426326
ARMC5	-0.29966	-0.398876	0.0992156	0.392872
ARMC6	-0.182285	-0.386402	0.204118	0.0722992
ARMC7	-1.52726	-1.28977	-0.23749	0.745869
ARMC8	0.0325021	0.0654327	-0.0329306	0.497997
ARMC9	0.137235	0.00434428	0.13289	0.0314933
ARMCX1	0.0576381	0.0772364	-0.0195983	0.882884
ARMCX2	-0.0967528	0.0150141	-0.111767	0.0821572
ARMCX3	0.0551525	0.0389446	0.0162079	0.929568
ARMCX4	0.172425	0.267778	-0.0953535	0.105135
ARMCX5	0.0986891	0.117283	-0.0185944	0.836604
ARMCX6	-0.183706	-0.223586	0.0398808	0.790882
ARMH1	-0.237551	-0.21828	-0.0192707	0.976496
ARMH2	0.184273	0.187009	-0.00273603	1
ARMH3	0.036519	-0.0201342	0.0566532	0.745869
ARMH4	-0.0093952	0.03301	-0.0424052	0.36106
ARMS2	0.169378	0.0794699	0.0899085	0.0554822
ARMT1	0.0784841	0.0774198	0.00106426	1
ARNT	-0.289721	-0.0727416	-0.21698	0.132942
ARNT2	0.00332616	0.0464299	-0.0431037	0.275659
ARPC1A	-0.0795304	-0.0838848	0.00435442	0.836604
ARPC1B	0.0439325	-0.00674575	0.0506782	0.392872
ARPC2	-0.326239	-0.382641	0.0564017	0.184898
ARPC3	-0.721676	-0.705548	-0.0161279	0.836604
ARPC4	-0.574065	-0.614876	0.0408113	0.658531
ARPC5	-0.35232	-0.264073	-0.0882471	0.132942
ARPC5L	0.0958511	0.0723069	0.0235441	0.976496
ARPIN	0.0855021	0.0786752	0.00682681	0.976496
ARPP19	-0.456098	-0.419539	-0.0365592	0.426326
ARPP21	0.211959	0.0485948	0.163365	0.00733777
ARR3	-0.0613273	-0.00153764	-0.0597897	0.426326
ARRB1	-0.193963	-0.121849	-0.0721145	0.227057
ARRB2	0.00983398	0.0806126	-0.0707787	0.166129
ARRDC1	-0.133904	-0.0868592	-0.0470452	0.461384
ARRDC2	-0.110436	-0.0971417	-0.0132944	0.882884
ARRDC3	0.130879	0.164794	-0.0339152	0.790882
ARRDC4	0.137578	0.0466271	0.0909507	0.048381
ARRDC5	0.0550868	-0.0373107	0.0923975	0.330915
ARSA	-0.166768	-0.0754871	-0.0912813	0.275659
ARSB	-0.122083	-0.159293	0.0372103	0.929568
ARSD	0.151295	0.262448	-0.111154	0.250536
ARSF	0.301317	0.212943	0.0883741	0.275659
ARSG	0.171733	0.0910464	0.0806863	0.36106
ARSH	0.0601063	0.0920384	-0.031932	0.250536
ARSI	0.0946301	0.00953121	0.0850989	0.461384
ARSJ	-0.0499858	-0.0413295	-0.0086563	0.882884
ARSK	0.00139433	-0.0504115	0.0518058	0.497997
ARSL	0.0345052	0.0482424	-0.0137373	0.426326
ART1	0.0541468	0.0119861	0.0421608	0.836604
ART3	0.010267	-0.0991001	0.109367	0.048381
ART4	0.14858	0.0765331	0.0720466	0.497997
ART5	0.112923	0.0630161	0.0499069	0.392872
ARTN	-0.345228	-0.270901	-0.0743267	0.330915
ARV1	-0.0207488	-0.0515973	0.0308485	0.790882
ARVCF	0.128066	0.100154	0.0279117	0.745869
ARX	0.0416352	0.0438088	-0.00217351	0.882884
AS3MT	0.106703	0.0354195	0.0712833	0.048381
ASAH1	-0.013551	0.0723078	-0.0858588	0.616465
ASAH2	0.112694	0.0761014	0.0365923	0.461384
ASAP1	0.0995754	0.173289	-0.0737135	0.36106
ASAP2	0.00836889	0.110046	-0.101677	0.0821572
ASAP3	-0.23006	-0.123535	-0.106525	0.0821572
ASB1	0.128551	0.0680468	0.060504	0.575621
ASB10	0.107219	0.024853	0.0823657	0.392872
ASB11	0.192111	0.19734	-0.00522962	0.616465
ASB12	0.0947537	0.0505554	0.0441984	1
ASB13	0.195501	0.130164	0.0653373	0.392872
ASB14	0.102426	0.0176975	0.0847286	0.275659
ASB15	0.273718	0.144807	0.128912	0.118399
ASB16	-0.0481886	-0.238678	0.190489	0.0420594
ASB17	-0.152758	-0.0899015	-0.0628566	0.392872
ASB18	0.0648322	0.0458364	0.0189958	0.616465
ASB2	0.210376	0.182463	0.0279129	0.205191
ASB3	-0.058871	-0.0600735	0.00120248	0.616465
ASB4	0.296026	0.205313	0.0907136	0.0930783
ASB5	0.289043	0.161191	0.127852	0.0930783
ASB6	-0.303497	-0.288729	-0.0147685	0.701708
ASB7	0.0563161	-0.016316	0.0726321	0.205191
ASB8	-0.163154	-0.0668314	-0.0963228	0.14883
ASB9	0.0813408	0.147608	-0.0662675	0.166129
ASCC1	-0.174995	-0.160836	-0.0141595	0.275659
ASCC2	0.0994382	0.10752	-0.0080816	0.790882
ASCC3	-0.221217	-0.325963	0.104746	0.36106
ASCL1	-0.0293654	-0.108589	0.0792236	0.166129
ASCL2	0.0588791	-0.0697657	0.128645	0.0930783
ASCL3	0.122592	0.144029	-0.0214368	0.330915
ASCL4	-0.148439	-0.0215954	-0.126844	0.132942
ASCL5	-0.256711	-0.237357	-0.0193544	0.836604
ASF1A	-0.0781092	-0.158262	0.0801528	0.497997
ASF1B	-0.301312	-0.222632	-0.0786797	0.275659
ASGR1	0.0227852	0.0464188	-0.0236336	0.929568
ASGR2	0.182058	0.129225	0.0528327	0.536102
ASH1L	-0.18935	-0.328404	0.139054	0.536102
ASH2L	-0.184986	-0.261885	0.0768991	0.536102
ASIC1	-0.12292	-0.270246	0.147327	0.166129
ASIC2	-0.0744438	0.0334158	-0.10786	0.0420594
ASIC3	0.14368	0.167556	-0.0238757	0.745869
ASIC4	0.114315	-0.000953943	0.115269	0.0722992
ASIC5	0.142676	0.146874	-0.00419774	0.701708
ASIP	0.110955	0.0781363	0.0328182	0.836604
ASL	-0.0403418	-0.0263977	-0.0139441	0.658531
ASNS	-0.419067	-0.317115	-0.101952	0.497997
ASNSD1	-0.23589	-0.144946	-0.0909443	0.0930783
ASPA	0.117052	0.122021	-0.00496921	0.745869
ASPDH	-0.00360982	0.0589176	-0.0625274	0.118399
ASPG	0.0682148	0.0823883	-0.0141735	0.745869
ASPH	0.0218414	0.0540428	-0.0322014	0.426326
ASPHD1	0.0879912	0.0241086	0.0638827	0.36106
ASPHD2	-0.0288227	-0.11741	0.0885875	0.14883
ASPM	-0.229425	-0.259651	0.030226	0.882884
ASPRV1	-0.146299	-0.0630631	-0.0832364	0.330915
ASPSCR1	-0.0418234	-0.12311	0.0812865	0.330915
ASRGL1	-0.0187134	-0.0242334	0.00552	0.976496
ASS1	-0.137542	-0.266928	0.129386	0.0930783
ASTE1	-0.032756	0.0110504	-0.0438065	0.302448
ASTL	-0.0780811	-0.11378	0.0356988	0.701708
ASTN1	-0.00562937	-0.0229873	0.0173579	0.658531
ASTN2	0.104189	0.0367033	0.0674856	0.302448
ASXL1	0.0403628	-0.0319674	0.0723302	0.461384
ASXL3	0.064497	0.104395	-0.0398984	0.36106
ASZ1	-0.169855	-0.0828087	-0.0870466	0.330915
ATAD1	-0.0136527	-0.0800684	0.0664157	0.330915
ATAD2	-0.232388	-0.202131	-0.0302568	0.616465
ATAD2B	0.135095	0.0223292	0.112766	0.0199355
ATAD3A	0.0732549	-0.0193929	0.0926478	0.166129
ATAD3B	0.162484	0.098086	0.0643985	0.36106
ATAD3C	0.307105	0.178365	0.128739	0.105135
ATAD5	-0.238351	-0.26114	0.0227891	0.616465
ATAT1	-0.00171982	-0.0105923	0.00887247	1
ATCAY	0.0360923	0.0110754	0.025017	0.836604
ATE1	-0.024592	0.0731449	-0.0977369	0.330915
ATF1	-0.0830147	-0.138744	0.0557293	0.461384
ATF2	0.0141822	0.100185	-0.0860029	0.976496
ATF3	0.112826	0.0514663	0.0613598	0.227057
ATF4	-0.685976	-0.566964	-0.119012	0.461384
ATF5	-0.030583	-0.195054	0.164471	0.0364513
ATF6	-0.0503646	-0.0757421	0.0253775	0.575621
ATF6B	-0.102816	-0.187331	0.0845155	0.227057
ATF7	-0.365707	-0.291052	-0.0746545	0.302448
ATF7IP	0.00788693	-0.0684255	0.0763124	0.497997
ATF7IP2	0.13061	0.0941774	0.0364322	0.205191
ATG10	-0.0478646	-0.0509962	0.00313163	0.976496
ATG101	-0.0645065	-0.118351	0.0538442	0.790882
ATG12	-0.140057	-0.119847	-0.0202097	0.976496
ATG13	-0.0226635	-0.00643619	-0.0162273	0.836604
ATG14	-0.15993	-0.0775938	-0.0823359	0.302448
ATG16L1	0.114659	0.0438169	0.0708419	0.132942
ATG16L2	-0.0939367	-0.107644	0.0137075	0.976496
ATG2A	-0.0626705	-0.218573	0.155903	0.048381
ATG2B	0.0540615	0.0901989	-0.0361374	0.745869
ATG3	-0.200434	-0.122591	-0.0778428	0.392872
ATG4A	0.0109687	0.0370481	-0.0260794	0.976496
ATG4B	0.117849	0.0795405	0.0383089	0.250536
ATG4C	-0.0231469	-0.0711966	0.0480497	0.929568
ATG4D	-0.146105	0.0133251	-0.15943	0.250536
ATG5	0.142712	0.0910152	0.0516966	0.497997
ATG7	0.121468	0.041508	0.0799602	0.132942
ATG9A	-0.153069	-0.143906	-0.00916374	0.575621
ATIC	-0.118289	-0.169646	0.0513574	0.497997
ATL1	-0.247316	-0.164851	-0.0824655	0.745869
ATL2	-0.591297	-0.698252	0.106955	1
ATL3	-0.0616523	-0.0977177	0.0360654	0.205191
ATM	-0.00327451	-0.106964	0.103689	0.250536
ATMIN	-0.20392	-0.175195	-0.0287251	1
ATN1	-0.116306	-0.110136	-0.00617017	0.976496
ATOH1	0.0214885	-0.0170844	0.038573	0.36106
ATOH7	0.0455636	-0.060406	0.10597	0.0930783
ATOH8	-0.164802	-0.117264	-0.047538	0.330915
ATOSA	-0.0435084	-0.0406418	-0.00286665	0.929568
ATOSB	-0.155339	-0.150603	-0.00473608	1
ATOX1	0.0139909	0.125233	-0.111242	0.330915
ATP10A	-0.145174	-0.149763	0.00458856	0.461384
ATP10B	0.122413	0.0562045	0.0662086	0.36106
ATP10D	0.0158676	-0.0167781	0.0326457	0.536102
ATP11A	0.0359657	0.0187481	0.0172176	0.929568
ATP11B	0.0910551	-0.0532181	0.144273	0.976496
ATP11C	0.0259633	0.0587604	-0.0327971	0.36106
ATP12A	-0.122847	-0.058201	-0.0646456	0.205191
ATP13A1	-0.351843	-0.235582	-0.116261	0.0930783
ATP13A2	0.0229996	-0.00135022	0.0243498	1
ATP13A3	-0.0591872	-0.0123764	-0.0468108	0.36106
ATP13A4	0.12511	0.115035	0.0100754	1
ATP13A5	0.223483	0.125626	0.0978565	0.929568
ATP1A1	-0.784521	-1.00985	0.225326	0.330915
ATP1A2	-0.0636269	0.045347	-0.108974	0.118399
ATP1A3	-0.126862	-0.0953463	-0.0315155	0.616465
ATP1A4	-0.111549	-0.0532711	-0.0582776	0.302448
ATP1B1	-0.134378	-0.108315	-0.0260627	1
ATP1B2	-0.0420299	-0.0201067	-0.0219232	0.701708
ATP1B3	-0.508401	-0.223746	-0.284655	0.166129
ATP1B4	-0.236489	-0.179093	-0.0573964	0.205191
ATP23	-0.601424	-0.515216	-0.0862075	0.132942
ATP2A1	-0.119867	-0.0830619	-0.0368055	0.616465
ATP2A2	-1.82634	-1.65576	-0.170584	0.976496
ATP2A3	-0.0963441	-0.116051	0.0197064	0.536102
ATP2B1	-0.186116	-0.112278	-0.0738385	0.205191
ATP2B2	-0.0191161	-0.0755562	0.0564402	0.275659
ATP2B3	0.150618	-0.0063957	0.157013	0.0122681
ATP2B4	-0.155634	-0.156625	0.000991623	0.929568
ATP2C1	-0.0991506	-0.0649062	-0.0342444	0.616465
ATP2C2	0.0110568	-0.0124889	0.0235457	0.536102
ATP4A	0.0971698	0.0234283	0.0737415	0.701708
ATP4B	0.070674	0.0921068	-0.0214328	0.836604
ATP5F1A	-0.691406	-0.623279	-0.0681263	0.330915
ATP5F1B	-0.746347	-0.797795	0.0514486	0.658531
ATP5F1C	-0.574697	-0.528389	-0.0463079	0.745869
ATP5F1D	-0.740723	-0.753877	0.0131543	0.976496
ATP5IF1	-0.312272	-0.255302	-0.0569696	0.36106
ATP5MC1	-0.428289	-0.416245	-0.0120431	0.882884
ATP5MC2	-0.339738	-0.326756	-0.0129815	0.882884
ATP5MC3	-0.0166219	0.012862	-0.0294839	0.616465
ATP5ME	-0.568226	-0.381365	-0.186862	0.227057
ATP5MF	-1.10733	-1.20696	0.0996325	0.616465
ATP5MG	-0.30547	-0.47821	0.17274	0.392872
ATP5MGL	-0.326358	-0.312927	-0.0134312	0.836604
ATP5MJ	-0.123207	-0.00517175	-0.118035	0.330915
ATP5MK	-0.42121	-0.235572	-0.185638	0.118399
ATP5PB	-0.501937	-0.615617	0.113679	0.536102
ATP5PD	-0.455465	-0.462972	0.00750696	0.976496
ATP5PF	-0.432113	-0.371592	-0.0605211	0.330915
ATP5PO	-0.408717	-0.400107	-0.00860939	0.790882
ATP6AP1	-0.939487	-1.02055	0.0810608	0.461384
ATP6AP2	-0.558833	-0.686558	0.127725	0.392872
ATP6V0A1	-0.110124	-0.180181	0.0700576	0.616465
ATP6V0A2	-0.119398	-0.0925714	-0.0268271	0.426326
ATP6V0A4	0.0478951	-0.0465824	0.0944775	0.184898
ATP6V0B	-1.04692	-1.07381	0.0268929	0.36106
ATP6V0C	-2.35077	-2.46737	0.116598	0.701708
ATP6V0D1	-1.2836	-1.28104	-0.00255992	0.745869
ATP6V0D2	-0.0697053	-0.0988234	0.0291181	0.976496
ATP6V0E1	0.02932	-0.0697937	0.0991138	0.36106
ATP6V0E2	-0.0480666	-0.0663279	0.0182613	0.929568
ATP6V1A	-1.88793	-2.00268	0.114748	0.790882
ATP6V1B1	-0.0559895	-0.017674	-0.0383155	0.701708
ATP6V1B2	-1.41122	-1.76287	0.351654	0.184898
ATP6V1C1	-0.666353	-0.823655	0.157302	0.227057
ATP6V1C2	0.092991	0.0352268	0.0577642	0.575621
ATP6V1D	-0.521473	-0.725786	0.204314	0.0634314
ATP6V1E1	-1.236	-1.3128	0.0767938	0.275659
ATP6V1E2	-0.00800832	0.0390055	-0.0470138	0.302448
ATP6V1F	-1.05247	-1.23378	0.181317	0.392872
ATP6V1G1	-0.947952	-0.983538	0.035586	1
ATP6V1G2	-0.0141355	-0.0701848	0.0560493	0.461384
ATP6V1G3	0.121831	0.0673878	0.0544435	0.426326
ATP6V1H	-0.77041	-0.745013	-0.0253968	0.790882
ATP7A	-0.107837	-0.0977317	-0.0101051	0.166129
ATP7B	0.0448758	0.0912243	-0.0463485	0.497997
ATP8A1	0.0108657	0.0541225	-0.0432568	0.392872
ATP8A2	-0.0307657	-0.0832882	0.0525225	0.184898
ATP8B1	0.140518	0.0863136	0.0542041	0.227057
ATP8B2	-0.172121	-0.100644	-0.0714775	0.497997
ATP8B3	0.046349	-0.0215542	0.0679032	0.461384
ATP8B4	0.107076	0.149176	-0.0420999	0.836604
ATP9A	-0.0269161	0.0450477	-0.0719638	0.132942
ATP9B	0.0690194	0.0393315	0.0296879	0.426326
ATPAF1	-0.0929626	-0.0695727	-0.0233899	0.536102
ATPAF2	-0.087598	-0.0744653	-0.0131326	0.536102
ATPSCKMT	0.200576	0.11189	0.0886863	0.929568
ATR	-1.20201	-1.26258	0.0605645	0.330915
ATRAID	-0.0678162	-0.0435793	-0.0242369	0.658531
ATRIP	-0.489404	-0.621014	0.131611	0.227057
ATRN	-0.122232	-0.0457029	-0.0765289	0.0930783
ATRNL1	0.25238	0.154114	0.0982655	0.0554822
ATRX	-0.0794265	-0.157352	0.077925	0.426326
ATXN1	0.0623025	0.0339683	0.0283343	0.790882
ATXN10	-0.275213	-0.368377	0.0931645	0.227057
ATXN1L	-0.196939	-0.0853568	-0.111582	0.184898
ATXN2	-0.180765	-0.272248	0.0914829	0.205191
ATXN2L	0.0604029	-0.11751	0.177913	0.0271254
ATXN3	0.0131978	0.0438717	-0.030674	0.536102
ATXN3L	0.248486	0.269719	-0.0212335	0.658531
ATXN7	0.110079	0.0264108	0.0836679	0.330915
ATXN7L1	-0.0254855	0.0114665	-0.036952	0.929568
ATXN7L2	-0.171015	-0.141873	-0.0291415	0.745869
ATXN7L3	-0.152514	-0.214149	0.061635	0.330915
ATXN7L3B	-0.208414	-0.191061	-0.0173528	0.575621
AUH	-0.0992101	-0.0499825	-0.0492276	0.426326
AUNIP	0.0799435	-0.0001	0.0800435	0.302448
AUP1	-0.232561	-0.187697	-0.0448635	0.497997
AURKA	-1.21449	-1.12033	-0.0941671	0.536102
AURKAIP1	-0.407341	-0.456731	0.0493901	0.836604
AURKB	-2.1012	-2.2106	0.109403	0.616465
AURKC	0.148804	0.0726011	0.0762025	0.616465
AUTS2	0.23447	0.105723	0.128748	0.0722992
AVEN	-0.0941557	-0.137886	0.0437301	0.836604
AVIL	-0.157409	-0.183145	0.0257357	0.575621
AVL9	0.170554	0.0947392	0.0758149	0.105135
AVP	-0.142596	-0.157518	0.0149219	0.976496
AVPI1	0.0209215	0.0199028	0.00101868	0.302448
AVPR1A	-0.0476593	-0.343885	0.296225	0.0420594
AVPR1B	-0.0201797	-0.0840367	0.0638569	0.392872
AVPR2	0.11673	0.0573002	0.0594294	0.701708
AWAT1	0.0812208	0.0619702	0.0192506	0.426326
AWAT2	-0.0455303	0.0501636	-0.0956939	0.048381
AXDND1	-0.284339	-0.149512	-0.134827	0.205191
AXIN1	-0.0522345	0.0323822	-0.0846167	0.790882
AXIN2	-0.0537784	-0.0137849	-0.0399936	0.536102
AXL	0.0704042	0.0523397	0.0180645	0.929568
AZGP1	-0.0971149	-0.201626	0.104511	0.048381
AZI2	0.0751376	-0.0167903	0.0919279	0.118399
AZIN1	-0.217434	-0.153213	-0.0642219	0.250536
AZIN2	0.0309511	0.0181264	0.0128247	0.976496
AZU1	0.179899	0.114252	0.0656474	0.250536
B2M	0.0374679	0.0963005	-0.0588325	0.461384
B3GALNT1	-0.0038471	-0.0268071	0.02296	0.461384
B3GALNT2	0.209187	0.0670695	0.142117	0.0364513
B3GALT1	0.0675209	-0.019069	0.0865899	0.0821572
B3GALT2	0.0621804	0.0392763	0.0229041	0.790882
B3GALT4	0.0712567	-0.0235557	0.0948124	0.14883
B3GALT5	0.219354	0.217951	0.00140297	0.976496
B3GALT6	0.0766624	0.116118	-0.0394555	0.392872
B3GAT1	0.00899872	0.0647611	-0.0557624	0.330915
B3GAT2	-0.0375126	-0.260137	0.222624	0.0199355
B3GAT3	-0.265138	-0.258082	-0.00705635	0.882884
B3GLCT	-0.104361	-0.0366948	-0.0676662	0.497997
B3GNT2	-0.0626103	-0.160023	0.0974128	0.275659
B3GNT3	-0.126345	-0.125536	-0.000809301	0.976496
B3GNT4	-0.154706	-0.20465	0.0499442	0.658531
B3GNT5	0.00523046	-0.0179921	0.0232225	0.497997
B3GNT6	-0.207962	-0.168496	-0.0394658	0.302448
B3GNT7	0.168594	0.0283104	0.140284	0.0103694
B3GNT8	0.0587668	0.112918	-0.0541508	0.536102
B3GNT9	-0.158536	-0.128576	-0.0299598	0.461384
B3GNTL1	0.0362864	0.0207082	0.0155782	0.575621
B4GALNT1	-0.080246	-0.102668	0.0224223	0.929568
B4GALNT2	-0.0835098	-0.105293	0.0217828	0.929568
B4GALNT3	-0.060986	-0.00914088	-0.0518452	0.426326
B4GALNT4	-0.0323475	-0.0337006	0.00135305	0.882884
B4GALT1	0.0635089	0.0542913	0.00921768	0.536102
B4GALT2	-0.23387	-0.161166	-0.0727033	0.14883
B4GALT3	-0.480356	-0.288259	-0.192097	0.0420594
B4GALT4	-0.00444673	0.0784954	-0.0829421	0.275659
B4GALT5	0.0210721	-0.00143042	0.0225025	0.836604
B4GALT6	-0.00670091	0.0185436	-0.0252445	0.882884
B4GALT7	-0.0704316	-0.0702178	-0.000213826	0.976496
B4GAT1	-0.254002	-0.242443	-0.0115595	0.575621
B9D1	0.129799	0.0276111	0.102188	0.536061
B9D2	-0.0636382	-0.0143509	-0.0492873	0.392872
BAALC	-0.0247987	0.00696412	-0.0317628	0.701708
BAAT	0.247779	0.101104	0.146676	0.0271254
BABAM1	0.220873	0.168056	0.0528175	0.976496
BABAM2	0.0659465	0.0790172	-0.0130707	0.701708
BACE1	-0.0916976	-0.10803	0.0163324	0.976496
BACE2	-0.00294368	0.103051	-0.105994	0.616465
BACH1	0.0840687	0.0784517	0.00561707	0.275659
BACH2	0.0311346	0.0770829	-0.0459482	0.461384
BAD	-0.117528	-0.22708	0.109551	0.227057
BAG1	-0.114205	-0.0409703	-0.073235	0.227057
BAG2	0.00499316	-0.00984189	0.014835	0.976496
BAG3	-0.110193	-0.0299853	-0.0802076	0.426326
BAG4	-0.120802	-0.172975	0.0521723	0.461384
BAG5	-0.167652	-0.113785	-0.0538679	0.250536
BAG6	-0.185202	-0.169629	-0.0155729	0.536102
BAHD1	-0.0655725	-0.137012	0.0714397	0.330915
BAIAP2	-0.184574	-0.126622	-0.0579526	0.275659
BAIAP2L1	0.0322564	0.0684107	-0.0361543	0.575621
BAIAP2L2	-0.0759741	-0.0281318	-0.0478423	0.426326
BAIAP3	0.0402443	-0.0251998	0.0654442	0.575621
BAK1	-0.553194	-0.535799	-0.017395	0.658531
BAMBI	-0.0136339	-0.0973868	0.0837528	0.745869
BANF1	-2.08809	-2.18297	0.0948772	0.658531
BANF2	0.190061	0.149716	0.040345	0.227057
BANK1	0.0308031	-0.0209986	0.0518018	0.426326
BANP	-0.823453	-0.788377	-0.0350753	0.701708
BAP1	-0.363133	-0.629728	0.266595	0.118399
BARD1	-0.821512	-0.574418	-0.247094	0.14883
BARHL1	-0.0119343	-0.0209123	0.00897799	0.658531
BARHL2	-0.430693	-0.234261	-0.196432	0.0271254
BARX1	0.0720926	-0.0801967	0.152289	0.0144687
BARX2	0.0515039	0.0479745	0.00352941	0.976496
BASP1	0.241186	0.153531	0.0876553	0.658531
BATF	-0.0413061	-0.00210952	-0.0391966	0.976496
BATF2	0.0182611	-0.0310364	0.0492975	0.36106
BATF3	0.00730741	0.0382848	-0.0309774	0.426326
BAX	0.0639168	0.0684443	-0.00452749	0.701708
BAZ1A	-0.148118	-0.166804	0.0186864	0.790882
BAZ1B	-0.413515	-0.351549	-0.0619659	0.536102
BAZ2A	-0.108824	-0.0890452	-0.0197789	0.575621
BAZ2B	-1.45e-05	0.0306795	-0.030694	0.426326
BBC3	-0.0737521	-0.115696	0.0419444	0.882884
BBIP1	0.0191219	0.0627715	-0.0436496	0.461384
BBLN	-0.266112	-0.343308	0.0771955	0.36106
BBOF1	-0.133308	-0.0797521	-0.0535559	0.205191
BBOX1	0.140705	0.14749	-0.00678521	0.929568
BBS1	-0.0969261	-0.112705	0.0157786	0.836604
BBS10	-0.196599	0.0337468	-0.230346	0.0634314
BBS12	0.0567637	0.0666683	-0.00990461	0.882884
BBS2	0.0433657	0.0126667	0.030699	0.330915
BBS4	0.126017	0.170982	-0.0449655	0.745869
BBS5	-0.0298812	0.0327235	-0.0626047	0.882884
BBS7	0.156135	0.0049658	0.15117	0.461384
BBS9	0.104395	0.0341322	0.070263	0.227057
BBX	0.236466	0.134403	0.102063	0.0314933
BCAM	0.0288311	0.067514	-0.0386829	0.701708
BCAN	-0.0404586	-0.174713	0.134254	0.227057
BCAP29	-0.127919	-0.0827802	-0.0451386	0.882884
BCAP31	-0.232156	-0.270882	0.0387261	0.497997
BCAR1	-0.0538932	-0.113114	0.0592208	0.929568
BCAR3	-0.0848553	-0.144833	0.0599775	0.497997
BCAS1	0.180262	0.0951904	0.0850718	0.392872
BCAS2	-1.05225	-1.32614	0.273891	0.0722992
BCAS3	-0.129704	-0.206354	0.0766503	0.836604
BCAS4	0.0314499	-0.00941046	0.0408604	0.616465
BCAT1	0.0291562	0.0515107	-0.0223546	0.929568
BCAT2	0.166646	0.0547871	0.111859	0.36106
BCCIP	-0.432724	-0.507225	0.0745011	0.426326
BCDIN3D	-0.395109	-0.345156	-0.0499533	0.536102
BCHE	0.00113666	0.0406208	-0.0394842	0.745869
BCKDHA	-0.0576774	-0.0826667	0.0249893	0.790882
BCKDHB	-0.0552333	-0.148043	0.0928098	0.302448
BCKDK	0.0919447	0.017935	0.0740097	0.36106
BCL10	-0.154836	-0.12177	-0.0330657	0.976496
BCL11A	0.086322	0.00650731	0.0798147	0.330915
BCL11B	-0.0105343	0.0301167	-0.0406511	0.658531
BCL2	0.147422	0.0536943	0.0937273	0.132942
BCL2A1	-0.0438123	0.00279277	-0.0466051	0.616465
BCL2L1	-0.946894	-1.45417	0.507271	0.0821572
BCL2L10	0.0635735	-0.0429117	0.106485	0.166129
BCL2L11	-0.0387183	-0.05385	0.0151318	0.575621
BCL2L12	-0.143861	-0.240256	0.0963945	0.166129
BCL2L13	-0.198821	-0.188871	-0.00994966	0.745869
BCL2L14	0.0665681	0.0389005	0.0276676	0.745869
BCL2L15	-0.0618196	-0.131991	0.0701718	0.745869
BCL2L2	-0.0564192	-0.13042	0.0740006	0.461384
BCL3	0.151403	0.102356	0.0490469	0.461384
BCL6	0.0382586	-0.0694296	0.107688	0.0554822
BCL6B	-0.00559911	0.0647635	-0.0703626	0.426326
BCL7A	-0.064237	-0.0523126	-0.0119243	0.701708
BCL7B	0.0738826	0.0802675	-0.00638497	0.976496
BCL7C	-0.10762	-0.0873925	-0.0202274	0.536102
BCL9	-0.219483	-0.207858	-0.0116252	0.658531
BCL9L	0.00853099	-0.0320363	0.0405673	0.658531
BCLAF1	-0.624724	-0.725962	0.101238	0.275659
BCLAF3	0.0326962	0.0317447	0.000951434	0.836604
BCO1	-0.0219794	0.0196787	-0.0416581	0.275659
BCO2	-0.0267464	0.0528403	-0.0795868	0.536102
BCOR	0.00390438	-0.0566281	0.0605325	0.836604
BCORL1	0.0693442	0.076551	-0.0072068	0.836604
BCR	0.0840987	0.0903943	-0.00629562	0.976496
BCS1L	-0.341806	-0.319816	-0.0219899	0.658531
BDH1	-0.0150675	0.021516	-0.0365835	0.497997
BDH2	-0.194977	-0.176643	-0.0183341	0.616465
BDKRB1	0.133198	0.143928	-0.0107303	1
BDKRB2	-0.0182832	0.114944	-0.133228	0.048381
BDNF	-0.110664	-0.10395	-0.00671395	0.929568
BDP1	-0.804365	-0.825624	0.0212595	0.658531
BEAN1	0.0987167	-0.00624144	0.104958	0.836604
BECN1	-0.225219	-0.323294	0.0980755	0.250536
BEGAIN	-0.00599453	-0.00624795	0.000253418	0.497997
BEND2	0.220624	0.199975	0.0206484	0.976496
BEND3	-0.112606	-0.0996001	-0.0130062	0.616465
BEND4	-0.0662338	-0.106445	0.0402108	0.929568
BEND5	0.0928433	0.0172434	0.0755999	0.048381
BEND6	0.118557	0.0197098	0.098847	0.302448
BEND7	0.189054	0.15283	0.0362237	0.658531
BEST1	0.0566702	-0.0197563	0.0764265	0.575621
BEST2	-0.0357418	-0.0867798	0.051038	0.497997
BEST3	-0.029575	-0.0685104	0.0389354	0.184898
BEST4	-0.00493028	-0.0965859	0.0916556	0.250536
BET1	-0.301043	-0.466046	0.165003	0.0554822
BET1L	0.0142972	0.0233688	-0.00907166	0.575621
BEX1	-0.0405108	0.0565544	-0.0970652	0.14883
BEX2	0.0633993	0.0416649	0.0217344	0.745869
BEX3	-0.0423685	0.0572431	-0.0996116	0.227057
BEX4	0.0391963	0.0415133	-0.00231703	0.790882
BEX5	0.111723	0.0866703	0.0250531	0.497997
BFAR	-0.00539873	-0.0115624	0.00616363	0.701708
BFSP1	0.0459227	0.0489088	-0.00298611	0.882884
BFSP2	0.158895	0.172722	-0.013827	1
BGLAP	-0.296435	-0.313122	0.0166868	0.790882
BGN	0.169633	0.0804602	0.0891726	0.184898
BHLHA15	-0.0981705	-0.194671	0.0965006	0.275659
BHLHA9	0.100284	0.0943866	0.00589749	0.976496
BHLHE22	-0.100713	-0.144543	0.0438294	0.790882
BHLHE40	0.0953841	0.0195905	0.0757937	0.392872
BHLHE41	0.0590944	-0.0890849	0.148179	0.14883
BHMT	-0.140693	-0.132016	-0.00867726	0.882884
BHMT2	0.297658	-0.0245951	0.322253	0.118399
BICC1	0.0137377	-0.0191238	0.0328615	0.976496
BICD1	-0.159603	-0.130926	-0.0286771	0.658531
BICD2	-0.052606	-0.113043	0.0604372	0.658531
BICDL1	-0.157255	-0.0783369	-0.0789179	0.105135
BICDL2	-0.187398	-0.266296	0.078898	0.536102
BICRA	-0.0297641	0.0231302	-0.0528943	0.658531
BICRAL	-0.0210327	-0.0762245	0.0551918	0.184898
BID	-0.0681752	0.0179761	-0.0861513	0.701708
BIK	0.229245	0.193955	0.0352901	0.536102
BIN1	-0.174978	-0.12843	-0.0465478	0.836604
BIN2	-0.0200654	-0.0911013	0.0710358	0.205191
BIN3	0.32385	0.206983	0.116867	0.426326
BIRC2	-0.439001	-0.199845	-0.239157	0.461384
BIRC3	-0.0198988	0.0689748	-0.0888736	0.616465
BIRC5	-2.09233	-1.96991	-0.122421	0.575621
BIRC6	-0.424337	-0.361387	-0.0629501	0.882884
BIRC7	0.113594	0.165486	-0.0518919	0.575621
BIVM	-0.0810504	-0.00585254	-0.0751979	0.790882
BLCAP	0.17211	0.105119	0.0669915	0.302448
BLID	0.0623047	0.0914762	-0.0291715	0.302448
BLK	0.272139	0.101759	0.170379	0.166129
BLM	-0.100751	-0.181151	0.0803999	0.205191
BLMH	0.0201559	0.0125628	0.00759314	0.701708
BLNK	0.103191	0.0168684	0.086323	0.14883
BLOC1S1	0.0674866	0.0429723	0.0245143	0.745869
BLOC1S2	0.0754323	0.0476589	0.0277734	0.701708
BLOC1S3	-0.0794455	-0.135408	0.0559627	0.36106
BLOC1S4	0.0174136	0.00257344	0.0148401	0.976496
BLOC1S5	0.0722043	0.0255097	0.0466946	0.426326
BLOC1S6	-0.0573843	-0.0463929	-0.0109914	0.745869
BLTP1	0.0441803	-0.0760838	0.120264	0.0314933
BLTP2	-0.484687	-0.434816	-0.0498711	0.132942
BLTP3A	-0.217394	-0.201988	-0.0154051	0.790882
BLTP3B	0.0811311	0.0203037	0.0608274	0.616465
BLVRA	0.0595118	0.108224	-0.0487127	0.330915
BLVRB	0.0826281	-0.0614425	0.144071	0.0232906
BLZF1	-0.174237	-0.0604452	-0.113792	0.0634314
BMAL1	-0.20595	-0.16439	-0.0415604	0.745869
BMAL2	-0.0391989	-0.125655	0.086456	0.575621
BMERB1	0.0211968	0.00455437	0.0166424	0.976496
BMF	-0.334294	-0.371542	0.0372477	0.790882
BMI1	0.0689656	0.0587766	0.0101891	0.882884
BMP1	0.0490485	0.0269822	0.0220663	1
BMP10	0.0625974	-0.0382283	0.100826	0.048381
BMP15	0.16233	0.179897	-0.0175673	0.882884
BMP2	0.0507448	0.00723621	0.0435086	0.658531
BMP2K	0.00604863	-0.0436021	0.0496507	0.882884
BMP3	0.076768	0.121859	-0.0450912	0.330915
BMP4	0.0331526	0.0292594	0.00389315	1
BMP5	0.0434578	0.0826851	-0.0392273	0.790882
BMP6	-0.0390864	-0.0478037	0.00871728	0.882884
BMP7	0.163476	0.0933977	0.0700786	0.616465
BMPER	-0.00529122	0.0588399	-0.0641311	0.048381
BMPR1A	-0.245468	-0.255495	0.010027	0.497997
BMPR1B	0.0391891	0.0502037	-0.0110146	0.426326
BMPR2	-0.0687294	-0.0515081	-0.0172212	0.745869
BMS1	-0.998142	-1.03831	0.0401636	0.616465
BMT2	0.037378	0.0298981	0.00747991	0.616465
BMX	0.175895	0.205133	-0.0292374	0.536102
BNC1	-0.124755	-0.0960805	-0.0286748	0.575621
BNC2	0.0615373	0.0696535	-0.00811616	0.302448
BNIP1	-0.443277	-0.43622	-0.00705619	0.929568
BNIP3	-0.347807	-0.298822	-0.0489858	0.36106
BNIP3L	0.243322	0.236609	0.00671351	1
BNIP5	-0.0481871	-0.0300441	-0.018143	0.701708
BNIPL	-0.214113	-0.145593	-0.0685203	0.250536
BOC	0.0465389	-0.0348492	0.0813881	0.132942
BOD1	-0.0110682	-0.09849	0.0874218	0.275659
BOD1L1	-0.242592	-0.157416	-0.0851766	0.658531
BOD1L2	0.0890078	0.108276	-0.0192687	0.836604
BOK	-0.0582085	-0.0102471	-0.0479614	0.745869
BOLA1	-0.113718	-0.138494	0.0247764	0.575621
BOLA3	-0.549647	-0.382704	-0.166942	0.392872
BOLL	0.0818547	0.0890957	-0.00724101	0.745869
BOP1	-1.7081	-1.30886	-0.399248	0.0554822
BORA	-0.596764	-0.755021	0.158257	0.184898
BORCS5	-0.200602	-0.183459	-0.0171432	0.882884
BORCS6	-0.0953496	-0.0398924	-0.0554572	0.461384
BORCS7	-0.0602469	-0.0550359	-0.00521094	0.836604
BORCS8	-0.203381	-0.21593	0.0125491	0.976496
BPGM	0.0323373	0.0073801	0.0249572	0.836604
BPHL	0.115429	0.138668	-0.0232393	0.575621
BPI	0.0986168	0.0771302	0.0214865	0.575621
BPIFA1	0.199325	0.0786109	0.120714	0.0364513
BPIFA2	0.135099	0.149148	-0.0140486	0.658531
BPIFA3	0.00744358	-0.10189	0.109334	0.0199355
BPIFB1	-0.0242539	-0.0770637	0.0528097	0.536102
BPIFB2	0.0157817	0.0738809	-0.0580992	0.330915
BPIFB3	0.0283413	-0.0686318	0.0969731	0.118362
BPIFB4	-0.0946188	-0.0981949	0.00357613	0.976496
BPIFB6	0.00137676	0.0120716	-0.0106949	0.882884
BPIFC	-0.101742	0.0599846	-0.161727	0.048381
BPNT1	-0.243963	-0.290896	0.0469324	0.882884
BPNT2	0.0186898	-0.00594199	0.0246318	0.976496
BPTF	-0.603351	-0.691499	0.0881483	0.426326
BRAF	-0.130856	-0.00757623	-0.12328	0.0930783
BRAP	-0.131279	-0.352742	0.221463	0.0420594
BRAT1	-0.164134	-0.335478	0.171345	0.536102
BRCA1	-0.512283	-0.492624	-0.0196591	0.976496
BRCA2	-0.418243	-0.539839	0.121596	0.227057
BRCC3	-0.0236208	0.0010174	-0.0246382	0.616465
BRD1	-0.335954	-0.160031	-0.175922	0.14883
BRD2	-0.482641	-0.542394	0.0597526	0.929568
BRD3	0.341889	0.128658	0.213231	0.497997
BRD4	-1.0222	-0.927399	-0.0948055	0.461384
BRD7	-0.377315	-0.371486	-0.00582848	0.658531
BRD8	-0.467385	-0.404994	-0.0623916	0.616465
BRD9	0.092708	0.0176158	0.0750921	0.658531
BRDT	0.0826842	0.0515381	0.031146	0.701708
BRF1	-1.00142	-1.32696	0.325544	0.0821572
BRF2	-1.83658	-1.89103	0.0544528	0.745869
BRI3	-0.340449	-0.406512	0.0660634	0.392872
BRI3BP	-0.00367874	-0.132876	0.129198	0.105135
BRICD5	0.075758	-0.0314511	0.107209	0.0314933
BRINP1	0.208067	0.148427	0.0596397	0.275659
BRINP2	-0.0347454	-0.0173638	-0.0173816	0.461384
BRINP3	0.120537	0.0294493	0.091088	0.0232906
BRIP1	-0.15232	-0.334902	0.182582	0.0722992
BRIX1	-1.21706	-1.04528	-0.171782	0.392872
BRK1	-0.221514	-0.216709	-0.0048056	0.836604
BRME1	0.124697	0.0238376	0.10086	0.0554822
BRMS1	-0.523025	-0.43627	-0.086755	0.36106
BRMS1L	-0.00363205	-0.118424	0.114792	0.14883
BROX	0.173096	0.190976	-0.0178798	0.976496
BRPF1	-0.132438	-0.2304	0.0979614	0.205191
BRPF3	-0.0945747	-0.0566117	-0.0379629	0.658531
BRS3	0.0537606	0.0955521	-0.0417915	0.929568
BRSK1	0.224869	0.122361	0.102508	0.0420594
BRSK2	-0.026679	0.0189534	-0.0456324	0.658531
BRWD1	-0.128449	-0.203691	0.0752423	0.184898
BRWD3	0.0369166	-0.0125871	0.0495036	0.392872
BSCL2	-0.268824	-0.159137	-0.109687	0.392872
BSDC1	-0.0920372	-0.07614	-0.0158971	0.392872
BSG	-0.164977	-0.102622	-0.0623552	0.302448
BSN	-0.3498	-0.282613	-0.0671867	0.461384
BSND	0.00767774	-0.0999777	0.107655	0.184898
BSPH1	0.173874	0.122922	0.050952	0.461384
BSPRY	0.142394	0.0954083	0.0469852	0.536102
BST1	-0.0909865	0.0523948	-0.143381	0.0170103
BST2	0.00037499	0.0111023	-0.0107273	0.575621
BSX	0.03203	0.0422899	-0.01026	0.882884
BTAF1	-0.495775	-0.526561	0.0307852	1
BTBD1	0.0649296	0.071919	-0.00698938	0.882884
BTBD10	-0.165672	-0.105362	-0.0603105	0.0821572
BTBD16	0.0585061	0.0582855	0.000220621	1
BTBD17	-0.159089	-0.12991	-0.0291788	0.497997
BTBD18	0.071132	-0.00253192	0.0736639	0.701708
BTBD2	0.0406974	0.0195534	0.021144	0.929568
BTBD3	-0.107198	-0.0903721	-0.0168258	0.745869
BTBD6	-0.0514213	-0.013076	-0.0383452	0.426326
BTBD7	-0.421585	-0.290815	-0.13077	0.250536
BTBD8	-0.0478871	-0.108957	0.0610701	0.701708
BTBD9	-0.21477	-0.193916	-0.0208535	0.836604
BTC	0.161506	0.120959	0.040547	0.745869
BTD	0.168692	0.13677	0.0319215	0.330915
BTF3	-0.742687	-0.645414	-0.0972721	0.461384
BTF3L4	-0.357887	-0.57401	0.216124	0.0821572
BTG1	-0.0892436	0.00114095	-0.0903846	0.0364513
BTG2	0.0570743	0.0502177	0.00685657	0.976496
BTG3	0.0283527	0.00308718	0.0252656	0.790882
BTG4	0.248141	0.172455	0.0756862	0.275659
BTK	-0.0486023	0.0258535	-0.0744558	0.0634314
BTLA	0.0478898	0.119692	-0.0718026	0.426326
BTN1A1	0.0430423	0.0131654	0.0298769	0.701708
BTN2A1	0.115606	0.125625	-0.0100191	0.882884
BTN2A2	0.206404	0.0861786	0.120225	0.0199355
BTN3A1	0.0840115	0.108071	-0.0240593	1
BTN3A2	0.213645	0.255164	-0.0415186	0.250536
BTN3A3	0.115381	0.129844	-0.0144622	0.701708
BTNL3	0.0394576	0.117485	-0.0780272	0.250536
BTNL8	-0.0368859	0.0259701	-0.062856	0.461384
BTNL9	0.146308	0.123701	0.0226074	0.790882
BTRC	-0.20977	-0.179205	-0.0305653	0.929568
BUB1	-0.721716	-0.750174	0.0284584	0.616465
BUB1B	-1.10043	-1.14762	0.0471892	0.976496
BUB3	-2.54779	-2.2981	-0.249683	0.426326
BUD13	-0.765829	-0.801836	0.036007	0.616465
BUD23	-1.43183	-1.54278	0.110949	0.575621
BUD31	-2.42921	-2.38946	-0.0397414	0.790882
BVES	0.0482164	0.0618235	-0.0136071	0.790882
BYSL	-1.24676	-1.3272	0.0804463	0.302448
BZW1	-0.164431	-0.143266	-0.021165	0.536102
BZW2	0.100525	0.0670616	0.0334632	0.205191
C10orf105	-0.0323153	-0.0030278	-0.0292875	0.790882
C10orf120	0.153293	0.122689	0.0306034	0.745869
C10orf53	0.150312	0.104708	0.0456043	0.701708
C10orf62	-0.0720346	0.0588748	-0.130909	0.048381
C10orf67	0.0932443	0.156184	-0.0629401	0.426326
C10orf71	0.0899162	0.128542	-0.0386254	0.497997
C10orf82	-0.017134	0.0429158	-0.0600497	0.0821572
C10orf88	-0.0267583	-0.0179791	-0.00877917	0.701708
C10orf90	0.0767759	0.0273415	0.0494344	0.929568
C11orf16	0.067836	0.0692288	-0.00139276	0.882884
C11orf21	0.146744	0.0260142	0.12073	0.0930783
C11orf24	0.0774958	0.0647156	0.0127802	0.929568
C11orf42	-0.00141185	0.0544116	-0.0558235	0.275659
C11orf52	0.132408	0.065138	0.0672696	0.302448
C11orf54	0.261301	0.0926558	0.168645	0.00292282
C11orf58	-0.0288542	-0.0617909	0.0329367	0.575621
C11orf65	-0.165458	0.00278269	-0.168241	0.0930783
C11orf68	-0.271684	-0.250424	-0.0212599	0.790882
C11orf71	0.160092	-0.0241225	0.184215	0.0170103
C11orf80	0.065992	0.0130305	0.0529615	0.536102
C11orf86	-0.233601	-0.174944	-0.0586579	0.184898
C11orf87	0.211337	0.075973	0.135364	0.0722992
C11orf91	-0.0856938	-0.13356	0.0478658	0.36106
C12orf29	-0.0832861	-0.000857936	-0.0824282	0.105135
C12orf4	-0.0855901	0.0868065	-0.172397	0.00873673
C12orf40	0.170552	0.0839903	0.0865622	0.0364513
C12orf42	0.0911513	0.0473344	0.0438169	0.227057
C12orf43	-0.113955	-0.122809	0.00885341	0.790882
C12orf50	-0.037809	-0.00336875	-0.0344403	0.882884
C12orf54	0.0321034	0.0346769	-0.00257353	0.790882
C12orf56	-0.371837	-0.233784	-0.138053	0.118399
C12orf57	-0.136658	-0.0461865	-0.0904717	0.461384
C12orf60	0.220724	0.155463	0.0652607	0.302448
C12orf71	0.0855676	0.0857057	-0.000138101	0.790882
C12orf75	-0.140362	-0.140359	-3.1e-06	0.745869
C14orf119	-0.206973	-0.174526	-0.0324462	0.461384
C14orf180	0.129565	0.0423198	0.0872448	0.250536
C14orf28	-0.156771	-0.0598169	-0.0969539	0.575621
C14orf39	0.20893	0.160435	0.0484944	0.497997
C14orf93	0.102367	-0.0608538	0.163221	0.392872
C15orf39	-0.103425	-0.0352163	-0.068209	0.205191
C15orf40	-0.00646122	-0.00935857	0.00289735	0.836604
C15orf48	0.0119525	0.0522998	-0.0403473	0.701708
C15orf61	0.0687605	0.112677	-0.0439164	0.426326
C15orf62	-0.0463784	-0.046071	-0.000307382	0.929568
C16orf46	-0.0516199	-0.0889275	0.0373076	0.790882
C16orf54	-0.0187703	-0.0577787	0.0390084	0.392872
C16orf74	0.020003	0.0435837	-0.0235807	0.616465
C16orf78	0.202154	0.153112	0.049042	0.302448
C16orf86	-0.418966	-0.361223	-0.0577429	0.330915
C16orf87	-0.194917	-0.168875	-0.026042	0.575621
C16orf89	-0.00885883	-0.0788311	0.0699722	0.227057
C16orf90	-0.269705	-0.249766	-0.0199391	0.616465
C16orf92	-0.215975	-0.266497	0.0505218	0.426326
C16orf95	-0.254683	-0.212752	-0.0419305	0.36106
C16orf96	-0.100109	-0.138957	0.038848	0.836604
C17orf107	-0.000152341	0.0630931	-0.0632454	0.426326
C17orf49	-0.575268	-0.551749	-0.0235188	0.461384
C17orf50	-0.568493	-0.30368	-0.264813	0.0232906
C17orf58	-0.455586	-0.521735	0.0661491	0.745869
C17orf75	-0.390767	-0.302037	-0.0887297	0.227057
C17orf78	-0.0523795	-0.00776457	-0.0446149	0.392872
C17orf80	-0.0265359	-0.0367451	0.0102092	0.882884
C17orf97	-0.0528599	0.0575992	-0.110459	0.0821572
C17orf98	-0.27091	-0.308558	0.0376482	0.745869
C17orf99	0.0136134	-0.0975829	0.111196	0.105135
C18orf21	-0.350852	-0.382702	0.0318501	0.36106
C18orf25	0.0372571	0.00918015	0.0280769	0.745869
C18orf32	-0.10393	-0.049185	-0.0547448	0.536102
C18orf54	0.108582	0.101914	0.00666743	0.701708
C18orf63	0.0539354	0.025055	0.0288805	0.882884
C19orf12	-0.0236947	-0.0964139	0.0727192	0.575621
C19orf18	0.119857	-0.0147234	0.13458	0.0420594
C19orf25	-0.0465298	-0.175536	0.129006	0.14883
C19orf33	-0.0712156	0.0225597	-0.0937753	0.105135
C19orf38	-0.102889	-0.202742	0.0998534	0.205191
C19orf44	-0.249642	-0.200012	-0.0496302	0.36106
C19orf47	-0.0205733	-0.112601	0.092028	0.184898
C19orf53	-0.821901	-0.626922	-0.194979	0.426326
C19orf67	-0.033579	-0.115804	0.0822246	0.14883
C19orf73	-0.0449647	-0.134451	0.0894865	0.184898
C19orf81	0.0376784	0.022367	0.0153114	0.658531
C19orf84	0.145557	0.0945494	0.0510074	0.575621
C1D	-0.339957	-0.405954	0.0659973	0.658531
C1GALT1	-0.0230617	-0.0519509	0.0288892	0.302448
C1GALT1C1	0.118626	0.121803	-0.00317756	0.790882
C1QA	-0.0731613	-0.0417032	-0.031458	0.976496
C1QB	-0.0890629	-0.0644049	-0.024658	0.701708
C1QBP	-0.484616	-0.501159	0.0165438	0.882884
C1QC	0.128281	0.049496	0.0787849	0.302448
C1QL1	0.00525102	-0.0423204	0.0475714	0.497997
C1QL2	-0.0230242	-0.0345284	0.0115042	1
C1QL3	0.166971	0.16899	-0.00201967	0.929568
C1QL4	-0.103271	-0.0465662	-0.0567047	0.330915
C1QTNF1	-0.196285	-0.198674	0.00238925	0.929568
C1QTNF12	-0.0381353	-0.0804399	0.0423046	0.330915
C1QTNF2	0.151233	0.0856915	0.0655414	0.330915
C1QTNF3	0.126818	0.122436	0.0043818	0.658531
C1QTNF4	-0.390559	-0.331555	-0.0590035	0.929568
C1QTNF5	-0.0972655	-0.115017	0.0177517	0.575621
C1QTNF6	-0.00830963	0.00377911	-0.0120887	0.701708
C1QTNF7	0.1868	0.139444	0.0473554	0.616465
C1QTNF8	-0.0900761	-0.0299852	-0.0600909	0.302448
C1RL	-0.0234692	0.0571913	-0.0806604	0.0634314
C1S	-0.136348	-0.117448	-0.0188995	0.575621
C1orf100	0.00541746	-0.0873827	0.0928002	0.205191
C1orf105	0.00647745	-0.0334526	0.03993	0.575621
C1orf109	-1.63748	-1.27648	-0.361007	0.250536
C1orf112	0.0979059	-0.0201677	0.118074	0.0722992
C1orf115	0.0767881	-0.0199799	0.096768	0.0554822
C1orf116	0.131379	0.00189171	0.129487	0.105135
C1orf122	-0.289563	-0.345507	0.0559448	0.658531
C1orf127	-0.116922	-0.151402	0.0344801	0.616465
C1orf131	-0.607008	-0.731395	0.124387	0.330915
C1orf141	0.122812	0.0944072	0.028405	0.929568
C1orf146	-0.104259	-0.0563483	-0.0479109	0.426326
C1orf159	-0.0249512	0.00228369	-0.0272349	0.929568
C1orf162	-0.190047	-0.216298	0.0262511	0.575621
C1orf174	0.0689535	0.0573324	0.0116211	0.790882
C1orf185	0.213853	0.0863535	0.127499	0.0271254
C1orf198	0.0532915	-0.0318589	0.0851504	0.0271254
C1orf21	-0.0660919	0.00832111	-0.074413	0.536102
C1orf210	0.0399262	0.0756053	-0.0356791	0.461384
C1orf216	-0.166943	-0.129077	-0.0378652	0.536102
C1orf226	-0.130524	-0.122487	-0.00803751	0.701708
C1orf35	-0.0616823	-0.0890041	0.0273218	0.745869
C1orf43	-0.378734	-0.222369	-0.156365	0.0122681
C1orf50	0.052258	-0.102027	0.154285	0.0364513
C1orf52	-0.22	-0.229422	0.00942235	0.790882
C1orf53	0.10654	-0.00300956	0.109549	0.166129
C1orf54	-0.19408	-0.0900967	-0.103984	0.302448
C1orf56	-0.312252	-0.218664	-0.0935885	0.250536
C1orf68	0.124652	0.0974066	0.0272453	0.882884
C1orf74	-0.144674	-0.13173	-0.0129437	0.836604
C1orf87	0.0156654	0.0241247	-0.00845924	0.836604
C1orf94	0.234039	0.138619	0.0954196	0.0199355
C2	-0.0221298	-0.05557	0.0334402	0.658531
C20orf141	0.0523491	0.0996938	-0.0473447	0.205191
C20orf144	-0.227268	-0.117437	-0.10983	0.118399
C20orf173	0.0864215	0.0138697	0.0725518	0.275659
C20orf202	-0.032031	-0.0303991	-0.00163189	0.929568
C20orf27	-0.0437347	-0.0131607	-0.0305741	0.461384
C20orf85	-0.119522	-0.110966	-0.00855658	0.836604
C20orf96	0.234388	0.151889	0.0824984	0.461384
C21orf140	0.131026	0.0877921	0.0432342	0.575621
C21orf58	-0.0848558	-0.0428027	-0.0420532	0.461384
C21orf62	0.00305579	0.0838602	-0.0808044	0.275659
C21orf91	0.040235	0.127403	-0.0871681	0.36106
C22orf15	-0.11945	-0.108055	-0.0113956	0.536102
C22orf23	-0.0770661	-0.137123	0.0600572	0.426326
C22orf31	-0.00211536	0.0461354	-0.0482508	0.275659
C22orf39	-0.1898	-0.185413	-0.00438721	0.882884
C22orf42	0.153109	0.0923398	0.0607688	0.166129
C2CD2	-0.0527101	-0.0478262	-0.00488387	0.976496
C2CD2L	0.115345	0.0418075	0.0735371	0.166129
C2CD3	-0.0855925	0.0100414	-0.0956339	0.205191
C2CD4A	-0.161903	-0.141267	-0.0206357	0.929568
C2CD4B	0.0488147	0.0615294	-0.0127148	0.882884
C2CD4C	0.195074	0.174134	0.0209395	0.882884
C2CD4D	-0.224308	-0.177504	-0.0468038	0.836604
C2CD5	0.117179	0.0701741	0.0470049	0.330915
C2CD6	-0.047115	-0.124864	0.0777488	0.227057
C2orf15	-0.234058	-0.125071	-0.108988	0.745869
C2orf42	-0.133329	-0.136597	0.00326843	0.745869
C2orf49	-0.354573	-0.222234	-0.13234	0.205191
C2orf50	0.182568	0.00463642	0.177931	0.0271254
C2orf66	0.155084	0.11221	0.0428737	0.461384
C2orf68	-0.456105	-0.327936	-0.128168	0.426326
C2orf69	-0.127837	-0.232935	0.105098	0.330915
C2orf72	0.211981	0.0853956	0.126586	0.790882
C2orf73	0.0826477	0.0134263	0.0692214	0.205191
C2orf76	-0.20216	-0.155467	-0.0466937	0.536102
C2orf78	-0.113781	-0.213737	0.0999563	0.616465
C2orf80	-0.034611	-0.0512582	0.0166471	0.536102
C2orf88	0.0600194	0.0130387	0.0469806	0.227057
C3	-0.012816	-0.0276045	0.0147885	0.461384
C3AR1	0.0550216	0.00448547	0.0505361	0.205191
C3orf14	0.137979	0.0986788	0.0393004	0.701708
C3orf18	0.078699	-0.0353232	0.114022	0.14883
C3orf20	0.0794324	0.0970051	-0.0175727	1
C3orf22	-0.210489	-0.0883838	-0.122105	0.0634314
C3orf33	0.180417	0.164102	0.0163152	0.790882
C3orf38	-0.291153	-0.318637	0.0274841	0.929568
C3orf52	0.0425208	0.0895448	-0.0470239	0.36106
C3orf62	-0.246262	-0.141099	-0.105163	0.461384
C3orf70	-0.0195829	-0.0854048	0.0658219	0.36106
C3orf80	0.168647	0.0893501	0.0792965	0.616465
C3orf84	-0.0575136	-0.0885177	0.0310041	0.426326
C4BPA	0.174876	0.126871	0.0480042	0.205191
C4BPB	-0.0336161	-0.0311823	-0.00243385	0.275659
C4orf17	0.15529	0.0695666	0.0857234	0.392872
C4orf19	0.175959	0.0511964	0.124763	0.0271254
C4orf3	-0.0229159	-0.00508155	-0.0178343	0.616465
C4orf33	0.108584	0.0667315	0.0418522	0.536102
C4orf36	0.042326	0.113138	-0.0708121	0.0722992
C4orf45	0.0419062	0.0677932	-0.025887	0.575621
C4orf46	-0.0649131	-0.0813777	0.0164646	0.976496
C4orf47	0.102755	0.160022	-0.0572674	0.790882
C4orf48	-0.0799517	-0.00681123	-0.0731404	0.184898
C4orf51	-0.0461454	0.00670838	-0.0528538	0.392872
C5	0.0657554	-0.023529	0.0892844	0.0634314
C5AR1	0.0957983	0.0708146	0.0249837	0.836604
C5AR2	0.12858	0.0619953	0.0665846	0.392824
C5orf15	-0.276742	-0.219781	-0.0569609	0.426326
C5orf22	0.0669243	0.063412	0.00351229	0.836604
C5orf24	0.156418	0.0651784	0.0912391	0.205191
C5orf34	-0.0441328	-0.0230869	-0.0210459	0.882884
C5orf46	0.260345	0.220741	0.0396044	0.392872
C5orf47	0.127919	0.108457	0.0194621	0.616465
C5orf52	-0.148341	-0.0566342	-0.091707	0.392872
C5orf63	0.0514252	0.0784807	-0.0270554	0.658531
C6	0.101643	0.106154	-0.00451056	0.976496
C6orf118	0.0678802	0.100255	-0.0323743	0.929568
C6orf120	0.00613682	0.0451877	-0.0390509	0.426326
C6orf132	-0.0201785	0.0348953	-0.0550739	0.205191
C6orf136	-0.236067	-0.234076	-0.00199037	0.575621
C6orf141	-0.0239793	-0.0927443	0.068765	0.250536
C6orf15	-0.188729	-0.151979	-0.0367502	0.929568
C6orf163	0.000420133	-0.0195394	0.0199595	0.882884
C6orf226	-0.0942523	-0.200513	0.106261	0.275659
C6orf47	-0.170616	-0.122082	-0.0485338	0.392872
C6orf52	0.0612599	0.0171787	0.0440812	0.330915
C6orf58	-0.0243552	0.0451008	-0.069456	0.745869
C6orf62	-0.0146417	0.102016	-0.116657	0.227057
C6orf89	-0.234536	-0.252073	0.0175367	0.701708
C7	0.0723157	0.0643274	0.00798831	0.745869
C7orf25	0.0351627	0.0271412	0.00802145	0.882884
C7orf31	0.0287498	0.0646594	-0.0359096	0.497997
C7orf33	-0.0429356	-0.00436807	-0.0385675	0.836604
C7orf50	0.128444	-0.0631612	0.191606	0.227057
C7orf57	0.0417589	0.0324303	0.00932868	0.575621
C8A	0.121326	0.079796	0.0415303	0.205191
C8B	0.126673	0.0889163	0.0377566	0.497997
C8G	0.133798	0.00205807	0.13174	0.0722992
C8orf33	-0.298847	-0.26562	-0.0332262	0.701708
C8orf34	-0.0795742	-0.0525643	-0.0270099	0.392872
C8orf48	0.120479	0.139582	-0.0191027	0.701708
C8orf58	-0.114203	0.0186666	-0.132869	0.0271254
C8orf74	-0.0155377	0.0766547	-0.0921924	0.14883
C8orf76	-0.0239846	-0.0516874	0.0277028	0.275659
C8orf82	-0.0553991	-0.0652459	0.00984679	0.658531
C8orf88	-0.0294033	-0.0286347	-0.000768545	0.882884
C9	-0.069517	-0.0747561	0.00523912	0.836604
C9orf131	-0.224446	-0.0811319	-0.143314	0.118399
C9orf152	0.109963	0.128019	-0.0180558	0.929568
C9orf153	0.03565	0.0556943	-0.0200443	0.790882
C9orf24	-0.306249	-0.20569	-0.100559	0.0930783
C9orf40	0.0492214	-0.0167603	0.0659817	0.616465
C9orf43	0.0239682	0.0661202	-0.042152	0.426326
C9orf50	0.249508	-0.0196276	0.269135	0.00733777
C9orf64	-0.0452999	-0.0149785	-0.0303214	0.392872
C9orf72	0.042324	0.0966235	-0.0542995	0.250536
C9orf78	-0.347746	-0.412163	0.0644165	0.882884
C9orf85	-0.0711827	-0.0991121	0.0279294	0.976496
CA1	0.0994823	-0.0216839	0.121166	0.575621
CA10	0.0220807	-0.0455992	0.0676799	0.302448
CA11	-0.139195	-0.134914	-0.0042812	0.616465
CA12	-0.0437434	-0.0634213	0.019678	0.882884
CA13	0.0572942	0.0743218	-0.0170276	0.575621
CA14	-0.0562958	-0.00140886	-0.0548869	0.205191
CA2	0.120959	0.0678377	0.0531217	0.461384
CA3	0.00260334	0.00636698	-0.00376364	0.836604
CA4	0.119221	0.0697526	0.0494687	0.392872
CA5A	-0.542232	-0.541672	-0.000560137	0.836604
CA5B	0.209444	0.108891	0.100552	0.14883
CA6	-0.108252	0.0146822	-0.122934	0.616465
CA7	-0.135429	-0.12303	-0.0123994	0.929568
CA8	-0.0665331	-0.0521329	-0.0144002	0.36106
CA9	-0.0970522	-0.101145	0.00409321	0.836604
CAAP1	-0.0126785	0.0265447	-0.0392232	0.836604
CAB39	0.0147273	-0.00389401	0.0186213	0.658531
CAB39L	0.0435334	0.100086	-0.0565527	0.132942
CABCOCO1	-0.166691	-0.117141	-0.04955	0.392872
CABIN1	-0.135445	-0.0716193	-0.0638259	0.330915
CABLES1	-0.0469172	-0.0310977	-0.0158195	0.497997
CABLES2	0.0321232	-0.0448294	0.0769526	0.205191
CABP1	0.147581	0.0959057	0.0516753	0.575621
CABP2	-0.0656126	-0.0931282	0.0275156	0.836604
CABP4	-0.0396738	-0.205644	0.165971	0.166129
CABP5	0.216978	0.0974626	0.119516	0.00292282
CABP7	-0.0686302	-0.130272	0.0616415	0.205191
CABS1	0.174622	0.114172	0.0604501	0.36106
CABYR	-0.0144021	0.0241235	-0.0385255	0.929568
CACFD1	0.0687959	0.0728793	-0.00408339	0.536102
CACHD1	-0.000207228	0.0488577	-0.0490649	0.745869
CACNA1A	-0.0150479	-0.0615861	0.0465383	0.426326
CACNA1B	-0.145415	-0.0714175	-0.0739972	0.166129
CACNA1C	-0.0531309	0.0201707	-0.0733017	0.0722992
CACNA1D	-0.0139529	0.0131278	-0.0270807	0.497997
CACNA1E	0.17779	0.157763	0.0200265	0.790882
CACNA1F	-0.0826848	0.000102164	-0.0827869	0.048381
CACNA1G	-0.18646	-0.208833	0.0223729	0.536102
CACNA1H	0.0390663	-0.0493347	0.088401	0.0930783
CACNA1I	0.0339375	-0.111078	0.145016	0.0122681
CACNA1S	-0.0406225	-0.0132947	-0.0273278	1
CACNA2D1	-0.129482	-0.107885	-0.021597	0.701708
CACNA2D2	-0.150319	-0.161598	0.0112788	0.497997
CACNA2D3	0.00949813	0.00277947	0.00671866	1
CACNA2D4	0.0565633	0.03096	0.0256033	0.575621
CACNB1	-0.215021	-0.290841	0.0758196	0.105135
CACNB2	0.0857823	0.0859198	-0.000137505	0.976496
CACNB3	-0.444719	-0.470257	0.0255388	0.929568
CACNB4	0.0952827	0.074073	0.0212097	0.745869
CACNG1	-0.116594	-0.075454	-0.0411403	0.575621
CACNG2	-0.126146	-0.114541	-0.0116054	0.836604
CACNG3	-0.0601873	0.0228337	-0.083021	0.976496
CACNG4	-0.058055	-0.105687	0.0476315	0.330915
CACNG5	0.106984	0.0137036	0.0932802	0.0821572
CACNG6	-0.232097	-0.108152	-0.123945	0.227057
CACNG7	0.359949	0.327959	0.0319894	0.616465
CACNG8	0.183122	0.144001	0.0391218	0.790882
CACTIN	-1.57564	-1.34364	-0.231998	0.302448
CACUL1	0.0629574	0.00481262	0.0581448	0.330915
CACYBP	-0.219702	-0.430103	0.210401	0.048381
CAD	-0.287016	-0.392444	0.105427	0.461384
CADM1	0.0261301	-0.0294117	0.0555418	0.976496
CADM2	-0.103048	-0.0167343	-0.0863136	0.426326
CADM3	0.0460555	0.0402094	0.00584615	0.882884
CADM4	-0.100402	-0.342307	0.241906	0.0271254
CADPS	0.104629	0.0475648	0.0570645	0.392872
CADPS2	0.176653	0.1486	0.0280534	0.790882
CAGE1	0.0971909	0.102873	-0.00568247	0.658531
CALB1	0.208396	0.207391	0.00100439	0.976496
CALB2	0.0787984	0.0611227	0.0176757	0.658531
CALCA	-0.0660151	-0.0443748	-0.0216403	0.745869
CALCB	-0.00955155	-0.189216	0.179664	0.0271254
CALCOCO1	-0.186315	-0.184123	-0.00219241	1
CALCOCO2	-0.0341233	-0.0474856	0.0133623	0.36106
CALCR	0.0982722	0.0159629	0.0823093	0.227057
CALCRL	0.156636	0.0880327	0.0686037	0.227057
CALD1	0.0596098	0.093973	-0.0343632	0.701708
CALHM1	-0.0446647	-0.000576984	-0.0440877	0.392872
CALHM2	0.0884278	0.0468843	0.0415435	0.616465
CALHM3	-0.0644488	-0.110566	0.0461173	0.302448
CALHM4	0.173357	0.118685	0.0546716	0.250536
CALHM5	0.0716103	0.103594	-0.0319842	0.745869
CALHM6	0.064852	0.0665575	-0.00170541	0.536102
CALM1	0.121263	0.0737866	0.0474765	0.302448
CALM2	0.0839406	0.113873	-0.0299324	0.658531
CALM3	0.0413879	0.0427068	-0.00131883	0.976496
CALML3	0.169029	0.154652	0.0143764	0.836604
CALML4	-0.0712632	-0.0797706	0.00850748	0.790882
CALML5	0.106259	0.0591361	0.0471225	0.575621
CALML6	-0.118589	-0.200555	0.0819659	0.105135
CALN1	-0.0730718	-0.159776	0.0867039	0.184898
CALR	-0.146959	-0.136371	-0.0105884	0.929568
CALR3	-0.221603	-0.115332	-0.10627	0.184898
CALU	0.0559777	0.120417	-0.0644396	0.250536
CALY	0.181576	0.136272	0.0453044	0.36106
CAMK1	-0.0666964	0.00118353	-0.06788	0.14883
CAMK1D	-0.0420052	0.03345	-0.0754552	0.36106
CAMK1G	0.13808	0.104672	0.033408	0.426326
CAMK2A	0.00687552	0.0300112	-0.0231357	0.497997
[truncated: 15,206 more rows]
