# Supplementary material for: Molecular subtyping of endometrial carcinoma cell lines uncovers subtype-specific targetable vulnerabilities
Source: Research Square preprint supplement (doi:10.21203/rs.3.rs-6536216/v1), 2025-05-10
Supplement: Supplementary file 4 [file 9501b3b014a775412d772357.docx]

**Molecular subtyping of endometrial carcinoma cell lines uncovers subtype-specific targetable vulnerabilities**

Eunice S. Li1,2*, Rebecca Ho1,2,*, Ran Tao1,2, Yannes W. Choi1,2, Chae Young Shin1,3, Shary Y. Chen1,2,3, Bengul Gokbayrak1,2,3, Janine Senz1,3, Betty Yao1,4, Liam Johnston1,4, Spencer D. Martin1, Eric Yang1, Mark Carey5, Bryan T. Hennessy6, David G. Huntsman1,2,3,5, Ramon I. Klein Geltink1,3,4,7, Lynn Hoang1,2, Yemin Wang1,2,3,#

**Supplementary Figures**

**Figure S1. Expression of p53, ARID1A and ARID1B in MMRd EC cell lines and their derived mouse xenografted tumors. (A)** H&E staining and immunostaining of VOA12371, HOUA-I and VOA14590H cell line xenografted tumors. (B) Immunoblotting of p53 expression in MMRd EC cell lines. (C) H&E staining of TEN cell line xenografted tumors.

**
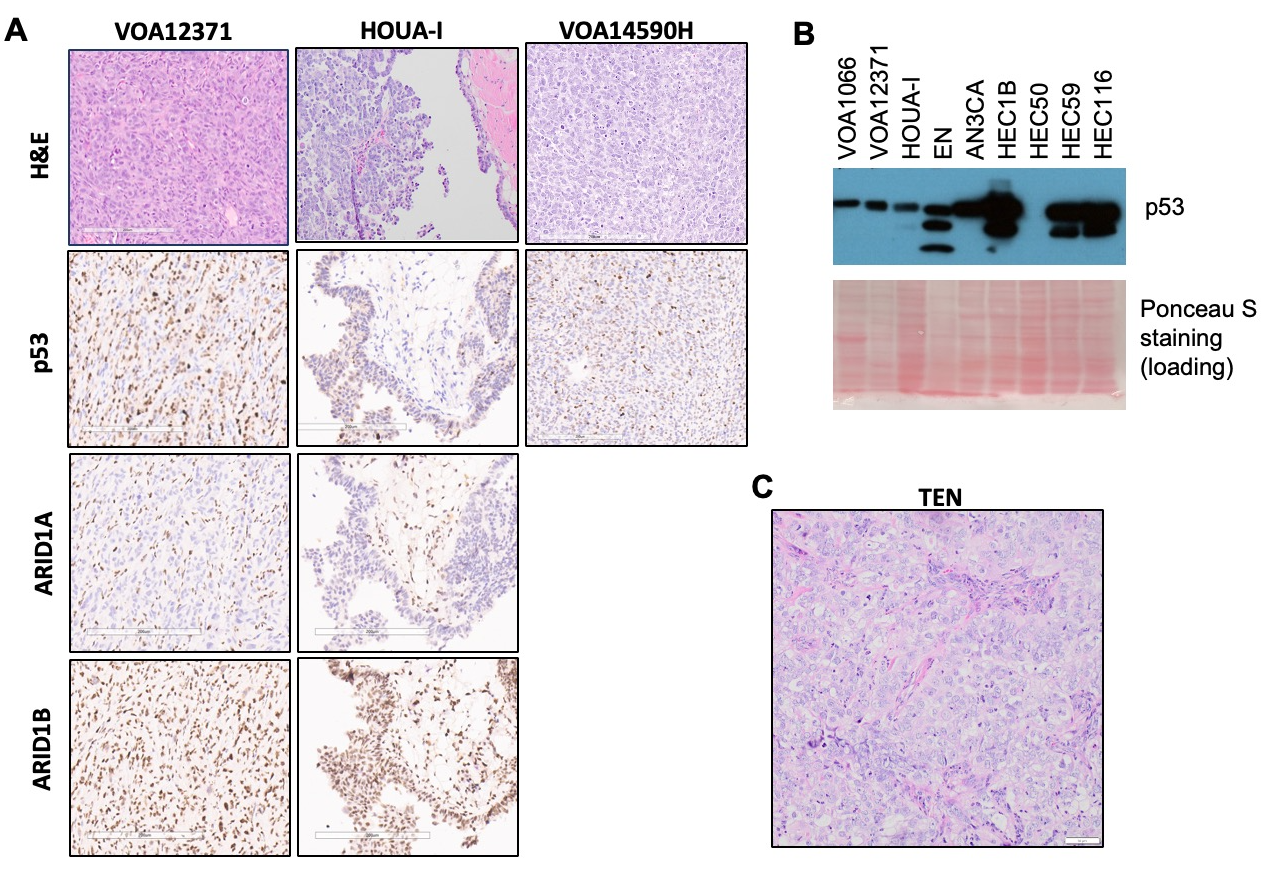
**

**Fig. S2 Histology of the primary tumors from which p53abn EC cell lines derived.**

**
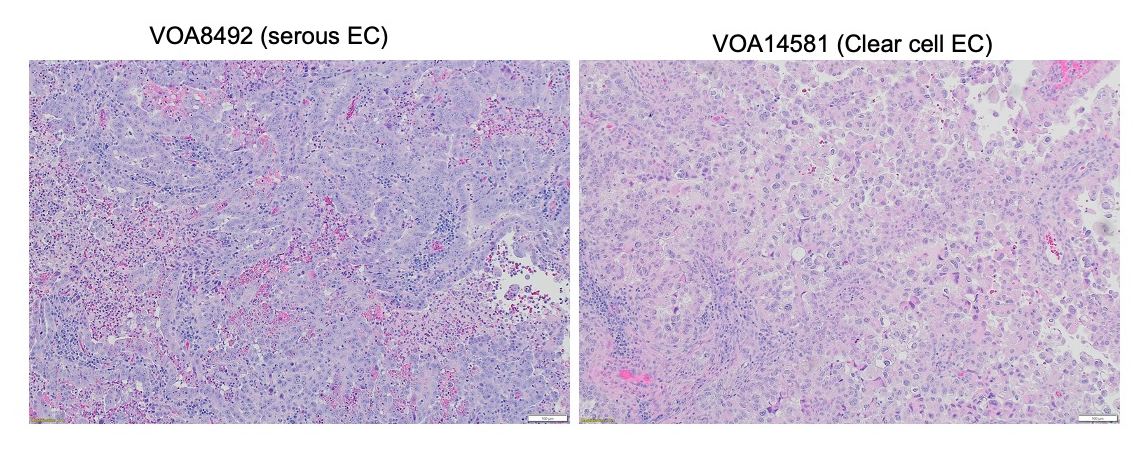
**

**Fig. S3 Immunoblotting confirmed the dual loss of ARID1A/B in EFO-27 cells.**

**
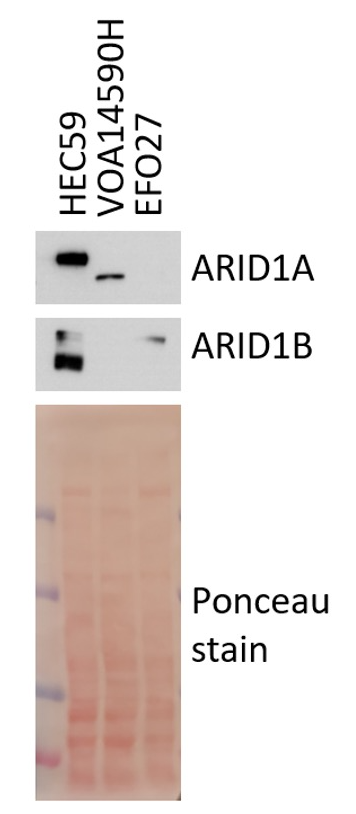
**

**Fig. S4 Seahorse assay analyzing the oxygen consumption rate in VOA1066 cells. (A)** Oxygen consumption rates (OCR) measured with the Seahorse Mito Stress test for VOA1066 cells treated with and without IACS-010759 (2 nM for 1 hour). (B) Bar graphs show relative basal respiration in (**A**).

**
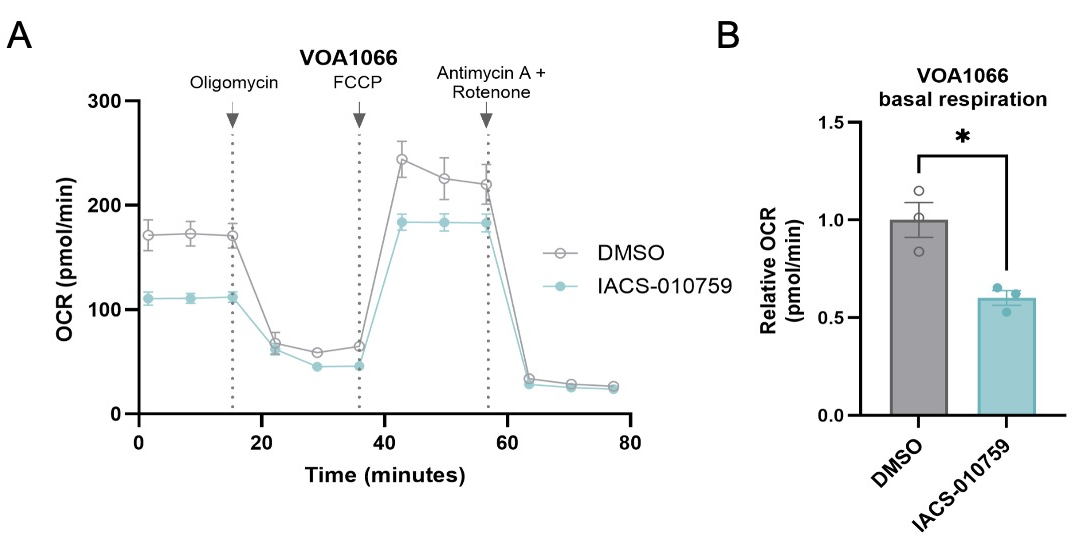
**
