# Supplementary material for: Molecular subtyping of endometrial carcinoma cell lines uncovers subtype-specific targetable vulnerabilities
Source: Research Square preprint supplement (doi:10.21203/rs.3.rs-6536216/v1), 2025-05-10
Supplement: Supplementary file 5 [file 9aee334c839b4a0cd69ba406.xlsx]

## Sheet: CNA_Genes
Table S3. List of CNVs of 60 copy-number high primary endometrial cancers from TCGA.
Gene	Gistic(Q-value)	Cytoband	CNA	Profiled Samples	#	Freq	Is Cancer Gene (source: OncoKB)
SETD1A	0.000518	16p11.2	AMP	10	60	0.167	Yes
ORAI3	0.000518	16p11.2	AMP	10	60	0.167	No
FBXL19	0.000518	16p11.2	AMP	10	60	0.167	No
HSD3B7		16p11.2	AMP	10	60	0.167	No
STX1B		16p11.2	AMP	10	60	0.167	No
BCL7C	0.000518	16p11.2	AMP	10	60	0.167	No
FBXL19-AS1	0.000518	16p11.2	AMP	10	60	0.167	No
CTF1	0.000518	16p11.2	AMP	10	60	0.167	No
ZNF689		16p11.2	AMP	9	60	0.15	No
ZNF747		16p11.2	AMP	9	60	0.15	No
PRR14		16p11.2	AMP	9	60	0.15	No
ZNF764		16p11.2	AMP	9	60	0.15	No
STX4		16p11.2	AMP	9	60	0.15	No
ZNF629		16p11.2	AMP	9	60	0.15	No
CFAP119		16p11.2	AMP	9	60	0.15	No
FBRS		16p11.2	AMP	9	60	0.15	No
SNORA30		16p11.2	AMP	9	60	0.15	No
SRCAP		16p11.2	AMP	9	60	0.15	No
ZNF688		16p11.2	AMP	9	60	0.15	No
ZNF768		16p11.2	AMP	9	60	0.15	No
PHKG2		16p11.2	AMP	9	60	0.15	No
RNF40		16p11.2	AMP	9	60	0.15	No
MIEN1	1.034e-29	17q12	AMP	16	60	0.267	No
PGAP3	1.034e-29	17q12	AMP	15	60	0.25	No
ERBB2	1.034e-29	17q12	AMP	15	60	0.25	Yes
GRB7	1.034e-29	17q12	AMP	15	60	0.25	Yes
TCAP		17q12	AMP	14	60	0.233	No
NEUROD2		17q12	AMP	14	60	0.233	No
PNMT		17q12	AMP	14	60	0.233	No
STARD3		17q12	AMP	14	60	0.233	No
PPP1R1B		17q12	AMP	14	60	0.233	No
CDK12		17q12	AMP	9	60	0.15	Yes
IKZF3	1.034e-29	17q12-q21.1	AMP	14	60	0.233	Yes
ZPBP2		17q21.1	AMP	11	60	0.183	No
GSDMB		17q21.1	AMP	10	60	0.167	No
ORMDL3		17q21.1	AMP	10	60	0.167	No
GSDMA		17q21.1	AMP	9	60	0.15	No
PSMD3		17q21.1	AMP	9	60	0.15	No
RPS6KB1		17q23.1	AMP	11	60	0.183	No
TUBD1		17q23.1	AMP	11	60	0.183	No
RNFT1		17q23.1	AMP	10	60	0.167	No
TBC1D3P1-DHX40P1		17q23.1	AMP	10	60	0.167	No
HEATR6		17q23.1	AMP	9	60	0.15	No
RECQL5	2.686e-10	17q25	AMP	10	60	0.167	No
TMEM94		17q25.1	AMP	12	60	0.2	No
GALK1	2.686e-10	17q25.1	AMP	10	60	0.167	No
ITGB4	2.686e-10	17q25.1	AMP	10	60	0.167	No
MYO15B	2.686e-10	17q25.1	AMP	10	60	0.167	No
TSEN54		17q25.1	AMP	10	60	0.167	No
SAP30BP	2.686e-10	17q25.1	AMP	10	60	0.167	No
CASKIN2		17q25.1	AMP	10	60	0.167	No
LLGL2	2.686e-10	17q25.1	AMP	10	60	0.167	No
H3-3B	2.686e-10	17q25.1	AMP	9	60	0.15	Yes
GRB2		17q25.1	AMP	9	60	0.15	No
CRLF1		19p12	AMP	12	60	0.2	No
NCAN		19p12	AMP	10	60	0.167	No
SUGP2		19p13	AMP	13	60	0.217	No
PIN1		19p13	AMP	10	60	0.167	No
OR1I1		19p13.1	AMP	17	60	0.283	No
OR7A5		19p13.1	AMP	13	60	0.217	No
OR7C1		19p13.1	AMP	12	60	0.2	No
UBA52		19p13.1-p12	AMP	12	60	0.2	No
PGPEP1		19p13.11	AMP	14	60	0.233	No
INSL3	9.944e-08	19p13.11	AMP	13	60	0.217	No
LSM4		19p13.11	AMP	13	60	0.217	No
ARRDC2	9.944e-08	19p13.11	AMP	13	60	0.217	No
B3GNT3	9.944e-08	19p13.11	AMP	13	60	0.217	No
KCNN1	9.944e-08	19p13.11	AMP	13	60	0.217	No
ANKLE1	9.944e-08	19p13.11	AMP	13	60	0.217	No
GTPBP3	9.944e-08	19p13.11	AMP	13	60	0.217	No
RPL18A	9.944e-08	19p13.11	AMP	13	60	0.217	No
GDF15		19p13.11	AMP	13	60	0.217	No
SLC25A42		19p13.11	AMP	13	60	0.217	No
NWD1	9.944e-08	19p13.11	AMP	13	60	0.217	No
IL12RB1		19p13.11	AMP	13	60	0.217	No
NIBAN3	9.944e-08	19p13.11	AMP	13	60	0.217	No
USE1	9.944e-08	19p13.11	AMP	13	60	0.217	No
CCDC124	9.944e-08	19p13.11	AMP	13	60	0.217	No
HOMER3		19p13.11	AMP	13	60	0.217	No
COPE		19p13.11	AMP	13	60	0.217	No
DDA1	9.944e-08	19p13.11	AMP	13	60	0.217	No
CPAMD8	9.944e-08	19p13.11	AMP	13	60	0.217	No
ARMC6		19p13.11	AMP	13	60	0.217	No
NR2F6	9.944e-08	19p13.11	AMP	13	60	0.217	No
USHBP1	9.944e-08	19p13.11	AMP	13	60	0.217	No
HAUS8	9.944e-08	19p13.11	AMP	13	60	0.217	No
SIN3B	9.944e-08	19p13.11	AMP	13	60	0.217	No
SNORA68	9.944e-08	19p13.11	AMP	13	60	0.217	No
F2RL3	9.944e-08	19p13.11	AMP	13	60	0.217	No
UNC13A	9.944e-08	19p13.11	AMP	13	60	0.217	No
CERS1		19p13.11	AMP	13	60	0.217	No
SLC5A5	9.944e-08	19p13.11	AMP	13	60	0.217	No
PGLS	9.944e-08	19p13.11	AMP	13	60	0.217	No
ABHD8	9.944e-08	19p13.11	AMP	13	60	0.217	No
DDX49		19p13.11	AMP	13	60	0.217	No
COLGALT1	9.944e-08	19p13.11	AMP	13	60	0.217	No
LRRC25		19p13.11	AMP	13	60	0.217	No
MRPL34	9.944e-08	19p13.11	AMP	13	60	0.217	No
JAK3	9.944e-08	19p13.11	AMP	13	60	0.217	Yes
BABAM1	9.944e-08	19p13.11	AMP	13	60	0.217	Yes
PLVAP	9.944e-08	19p13.11	AMP	13	60	0.217	No
IQCN		19p13.11	AMP	13	60	0.217	No
JUND		19p13.11	AMP	13	60	0.217	No
GDF1		19p13.11	AMP	13	60	0.217	No
OCEL1	9.944e-08	19p13.11	AMP	13	60	0.217	No
ANO8	9.944e-08	19p13.11	AMP	13	60	0.217	No
MVB12A	9.944e-08	19p13.11	AMP	12	60	0.2	No
NXNL1	9.944e-08	19p13.11	AMP	12	60	0.2	No
KLF2	9.944e-08	19p13.11	AMP	12	60	0.2	Yes
FKBP8		19p13.11	AMP	12	60	0.2	No
ISYNA1		19p13.11	AMP	12	60	0.2	No
FAM32A	9.944e-08	19p13.11	AMP	12	60	0.2	No
EPS15L1	9.944e-08	19p13.11	AMP	12	60	0.2	No
REX1BD		19p13.11	AMP	12	60	0.2	No
CIB3	9.944e-08	19p13.11	AMP	12	60	0.2	No
MPV17L2		19p13.11	AMP	12	60	0.2	No
MYO9B	9.944e-08	19p13.11	AMP	12	60	0.2	No
IFI30		19p13.11	AMP	12	60	0.2	No
UPF1		19p13.11	AMP	12	60	0.2	Yes
RAB3A		19p13.11	AMP	12	60	0.2	No
SLC27A1	9.944e-08	19p13.11	AMP	12	60	0.2	No
HSH2D	9.944e-08	19p13.11	AMP	12	60	0.2	No
ELL		19p13.11	AMP	12	60	0.2	Yes
KXD1		19p13.11	AMP	12	60	0.2	No
RAB8A	9.944e-08	19p13.11	AMP	12	60	0.2	No
SSBP4		19p13.11	AMP	12	60	0.2	No
AP1M1	9.944e-08	19p13.11	AMP	12	60	0.2	No
MAST3		19p13.11	AMP	12	60	0.2	No
FCHO1	9.944e-08	19p13.11	AMP	12	60	0.2	No
CRTC1		19p13.11	AMP	12	60	0.2	Yes
TMEM59L		19p13.11	AMP	12	60	0.2	No
BST2	9.944e-08	19p13.11	AMP	12	60	0.2	No
PDE4C		19p13.11	AMP	12	60	0.2	No
COMP		19p13.11	AMP	12	60	0.2	No
PIK3R2		19p13.11	AMP	12	60	0.2	Yes
TMEM38A	9.944e-08	19p13.11	AMP	11	60	0.183	No
MEF2B		19p13.11	AMP	11	60	0.183	Yes
KLHL26		19p13.11	AMP	11	60	0.183	No
SMIM7	9.944e-08	19p13.11	AMP	11	60	0.183	No
SLC35E1	9.944e-08	19p13.11	AMP	11	60	0.183	No
TMEM161A		19p13.11	AMP	11	60	0.183	No
C19ORF44	9.944e-08	19p13.11	AMP	11	60	0.183	No
MED26	9.944e-08	19p13.11	AMP	11	60	0.183	No
BORCS8-MEF2B		19p13.11	AMP	11	60	0.183	No
CALR3	9.944e-08	19p13.11	AMP	11	60	0.183	No
NR2C2AP		19p13.11	AMP	11	60	0.183	No
CHERP	9.944e-08	19p13.11	AMP	11	60	0.183	No
RFXANK		19p13.11	AMP	11	60	0.183	No
YJEFN3		19p13.11	AMP	10	60	0.167	No
GATAD2A		19p13.11	AMP	10	60	0.167	No
HAPLN4		19p13.11	AMP	10	60	0.167	No
SUGP1		19p13.11	AMP	10	60	0.167	No
NDUFA13		19p13.11	AMP	10	60	0.167	No
TSSK6		19p13.11	AMP	10	60	0.167	No
TM6SF2		19p13.11	AMP	10	60	0.167	No
MAU2		19p13.11	AMP	10	60	0.167	No
CILP2		19p13.11	AMP	10	60	0.167	No
ATP13A1		19p13.11	AMP	9	60	0.15	No
GMIP		19p13.11	AMP	9	60	0.15	No
LPAR2		19p13.11	AMP	9	60	0.15	No
PBX4		19p13.11	AMP	9	60	0.15	No
ZNF14		19p13.11	AMP	9	60	0.15	No
ZNF101		19p13.11	AMP	9	60	0.15	No
EPHX3	9.944e-08	19p13.12	AMP	18	60	0.3	No
TEKTL1		19p13.12	AMP	17	60	0.283	No
SYDE1		19p13.12	AMP	17	60	0.283	No
CASP14		19p13.12	AMP	17	60	0.283	No
ILVBL		19p13.12	AMP	17	60	0.283	No
NOTCH3	9.944e-08	19p13.12	AMP	16	60	0.267	Yes
PTGER1		19p13.12	AMP	16	60	0.267	No
BRD4	9.944e-08	19p13.12	AMP	16	60	0.267	Yes
NANOS3		19p13.12	AMP	16	60	0.267	No
SLC1A6		19p13.12	AMP	16	60	0.267	No
PKN1		19p13.12	AMP	16	60	0.267	No
DDX39A		19p13.12	AMP	15	60	0.25	No
BRME1		19p13.12	AMP	15	60	0.25	No
NDUFB7		19p13.12	AMP	15	60	0.25	No
TECR		19p13.12	AMP	15	60	0.25	No
DNAJB1		19p13.12	AMP	15	60	0.25	Yes
RFX1		19p13.12	AMP	15	60	0.25	No
CC2D1A		19p13.12	AMP	15	60	0.25	No
ADGRE5		19p13.12	AMP	15	60	0.25	No
CLEC17A		19p13.12	AMP	15	60	0.25	No
DCAF15		19p13.12	AMP	15	60	0.25	No
ADGRE3		19p13.12	AMP	15	60	0.25	No
PODNL1		19p13.12	AMP	15	60	0.25	No
SNRPGP15		19p13.12	AMP	15	60	0.25	No
GIPC1		19p13.12	AMP	15	60	0.25	No
AKAP8	9.944e-08	19p13.12	AMP	14	60	0.233	No
OR7C2		19p13.12	AMP	14	60	0.233	No
OR7A17		19p13.12	AMP	14	60	0.233	No
ZNF333		19p13.12	AMP	14	60	0.233	No
CYP4F22	9.944e-08	19p13.12	AMP	13	60	0.217	No
WIZ	9.944e-08	19p13.12	AMP	13	60	0.217	No
ADGRE2		19p13.12	AMP	13	60	0.217	No
PGLYRP2	9.944e-08	19p13.12	AMP	13	60	0.217	No
ASF1B		19p13.12	AMP	13	60	0.217	No
OR7A10		19p13.12	AMP	13	60	0.217	No
AKAP8L	9.944e-08	19p13.12	AMP	13	60	0.217	No
ADGRL1		19p13.12	AMP	13	60	0.217	No
RASAL3	9.944e-08	19p13.12	AMP	13	60	0.217	No
OR10H4	9.944e-08	19p13.12	AMP	12	60	0.2	No
LINC00905	9.944e-08	19p13.12	AMP	12	60	0.2	No
MISP3		19p13.12	AMP	12	60	0.2	No
OR10H5	9.944e-08	19p13.12	AMP	12	60	0.2	No
UCA1	9.944e-08	19p13.12	AMP	12	60	0.2	No
RLN3		19p13.12	AMP	12	60	0.2	No
IL27RA		19p13.12	AMP	12	60	0.2	No
PALM3		19p13.12	AMP	12	60	0.2	No
SAMD1		19p13.12	AMP	12	60	0.2	No
PRKACA		19p13.12	AMP	12	60	0.2	Yes
CYP4F8	9.944e-08	19p13.12	AMP	12	60	0.2	No
CYP4F3	9.944e-08	19p13.12	AMP	12	60	0.2	No
CYP4F12	9.944e-08	19p13.12	AMP	12	60	0.2	No
MAP1S	9.944e-08	19p13.12	AMP	12	60	0.2	No
OR10H3	9.944e-08	19p13.12	AMP	12	60	0.2	No
OR10H1	9.944e-08	19p13.12	AMP	12	60	0.2	No
OR10H2	9.944e-08	19p13.12	AMP	12	60	0.2	No
CYP4F2	9.944e-08	19p13.12	AMP	12	60	0.2	No
CYP4F11	9.944e-08	19p13.12	AMP	12	60	0.2	No
TPM4	9.944e-08	19p13.12-p13.11	AMP	12	60	0.2	Yes
YJU2B		19p13.13	AMP	18	60	0.3	No
STX10		19p13.13	AMP	16	60	0.267	No
NFIX		19p13.13	AMP	16	60	0.267	No
IER2		19p13.13	AMP	16	60	0.267	No
ZSWIM4		19p13.13	AMP	16	60	0.267	No
MRI1		19p13.13	AMP	16	60	0.267	No
CACNA1A		19p13.13	AMP	16	60	0.267	No
TRMT1		19p13.13	AMP	16	60	0.267	No
NACC1		19p13.13	AMP	16	60	0.267	No
C19ORF53		19p13.13	AMP	16	60	0.267	No
LYL1		19p13.13	AMP	16	60	0.267	Yes
DAND5		19p13.13	AMP	15	60	0.25	No
DNASE2		19p13.13	AMP	14	60	0.233	No
GCDH		19p13.13	AMP	14	60	0.233	No
KLF1		19p13.13	AMP	14	60	0.233	No
BEST2		19p13.13	AMP	13	60	0.217	No
RTBDN		19p13.13	AMP	13	60	0.217	No
PRDX2		19p13.13	AMP	13	60	0.217	No
RAD23A		19p13.13	AMP	13	60	0.217	No
SNORD41		19p13.13	AMP	13	60	0.217	No
CALR		19p13.13	AMP	13	60	0.217	Yes
TRIR		19p13.13	AMP	13	60	0.217	No
FARSA		19p13.13	AMP	13	60	0.217	No
DHPS		19p13.13	AMP	13	60	0.217	No
TNPO2		19p13.13	AMP	13	60	0.217	No
FBXW9		19p13.13	AMP	13	60	0.217	No
SYCE2		19p13.13	AMP	13	60	0.217	No
GET3		19p13.13	AMP	13	60	0.217	No
RNASEH2A		19p13.13	AMP	13	60	0.217	Yes
HOOK2		19p13.13	AMP	13	60	0.217	No
JUNB		19p13.13	AMP	13	60	0.217	No
GADD45GIP1		19p13.13	AMP	13	60	0.217	No
MAST1		19p13.13	AMP	13	60	0.217	No
ZNF791		19p13.13	AMP	11	60	0.183	No
WDR83OS		19p13.13	AMP	11	60	0.183	No
MAN2B1		19p13.13	AMP	11	60	0.183	No
WDR83		19p13.13	AMP	11	60	0.183	No
DNM2	1.681e-12	19p13.2	AMP	15	60	0.25	Yes
SLC44A2		19p13.2	AMP	14	60	0.233	No
ILF3		19p13.2	AMP	14	60	0.233	No
TMEM205		19p13.2	AMP	13	60	0.217	No
ATG4D		19p13.2	AMP	13	60	0.217	No
CARM1		19p13.2	AMP	13	60	0.217	Yes
YIPF2		19p13.2	AMP	13	60	0.217	No
CDKN2D		19p13.2	AMP	13	60	0.217	No
AP1M2		19p13.2	AMP	13	60	0.217	No
CCDC159		19p13.2	AMP	13	60	0.217	No
C19ORF38		19p13.2	AMP	13	60	0.217	No
TMED1		19p13.2	AMP	13	60	0.217	No
KRI1		19p13.2	AMP	13	60	0.217	No
SMARCA4		19p13.2	AMP	13	60	0.217	Yes
TIMM29		19p13.2	AMP	13	60	0.217	No
S1PR5		19p13.2	AMP	12	60	0.2	No
ZNF443		19p13.2	AMP	12	60	0.2	No
DOCK6		19p13.2	AMP	12	60	0.2	No
PLPPR2		19p13.2	AMP	12	60	0.2	No
RAB3D		19p13.2	AMP	12	60	0.2	No
TYK2		19p13.2	AMP	12	60	0.2	Yes
ZNF564		19p13.2	AMP	12	60	0.2	No
ZNF709		19p13.2	AMP	12	60	0.2	No
RGL3		19p13.2	AMP	12	60	0.2	No
EPOR		19p13.2	AMP	12	60	0.2	Yes
SWSAP1		19p13.2	AMP	12	60	0.2	No
KANK2		19p13.2	AMP	12	60	0.2	No
TSPAN16		19p13.2	AMP	12	60	0.2	No
ZNF44		19p13.2	AMP	12	60	0.2	No
CDC37		19p13.2	AMP	12	60	0.2	No
SPC24		19p13.2	AMP	12	60	0.2	No
LDLR		19p13.2	AMP	12	60	0.2	No
ZNF442		19p13.2	AMP	12	60	0.2	No
ZNF563		19p13.2	AMP	12	60	0.2	No
KEAP1		19p13.2	AMP	12	60	0.2	Yes
PDE4A		19p13.2	AMP	12	60	0.2	No
ZNF799		19p13.2	AMP	12	60	0.2	No
EIF3G		19p13.2	AMP	11	60	0.183	No
CNN1		19p13.2	AMP	11	60	0.183	No
ZNF653		19p13.2	AMP	11	60	0.183	No
MRPL4		19p13.2	AMP	11	60	0.183	No
ZNF878		19p13.2	AMP	11	60	0.183	No
ODAD3		19p13.2	AMP	11	60	0.183	No
ZNF433		19p13.2	AMP	11	60	0.183	No
ZNF627		19p13.2	AMP	11	60	0.183	No
ECSIT		19p13.2	AMP	11	60	0.183	Yes
ICAM4		19p13.2	AMP	11	60	0.183	No
ICAM5		19p13.2	AMP	11	60	0.183	No
ICAM1		19p13.2	AMP	11	60	0.183	No
ZNF823		19p13.2	AMP	11	60	0.183	No
ZNF441		19p13.2	AMP	11	60	0.183	No
ELAVL3		19p13.2	AMP	11	60	0.183	No
ZNF788P		19p13.2	AMP	11	60	0.183	No
ACP5		19p13.2	AMP	11	60	0.183	No
PRKCSH		19p13.2	AMP	11	60	0.183	No
S1PR2		19p13.2	AMP	11	60	0.183	Yes
DNMT1		19p13.2	AMP	11	60	0.183	Yes
ZNF625		19p13.2	AMP	11	60	0.183	No
ZNF844		19p13.2	AMP	11	60	0.183	No
ZNF20		19p13.2	AMP	11	60	0.183	No
ZNF136		19p13.2	AMP	11	60	0.183	No
ELOF1		19p13.2	AMP	11	60	0.183	No
ZNF562		19p13.2	AMP	10	60	0.167	No
ZNF426		19p13.2	AMP	10	60	0.167	No
ZNF561		19p13.2	AMP	10	60	0.167	No
ZNF846		19p13.2	AMP	10	60	0.167	No
PPAN		19p13.2	AMP	10	60	0.167	No
OLFM2		19p13.2	AMP	10	60	0.167	No
RDH8		19p13.2	AMP	10	60	0.167	No
ANGPTL6		19p13.2	AMP	10	60	0.167	No
PPAN-P2RY11		19p13.2	AMP	10	60	0.167	No
ICAM3		19p13.2	AMP	10	60	0.167	No
ZNF440		19p13.2	AMP	10	60	0.167	No
FBXL12		19p13.2	AMP	10	60	0.167	No
RAVER1		19p13.2	AMP	10	60	0.167	No
SNORD105		19p13.2	AMP	10	60	0.167	No
ZNF491		19p13.2	AMP	10	60	0.167	No
COL5A3		19p13.2	AMP	10	60	0.167	No
C3P1		19p13.2	AMP	10	60	0.167	No
ZNF69		19p13.2	AMP	10	60	0.167	No
ZNF833P		19p13.2	AMP	10	60	0.167	No
FDX2		19p13.2	AMP	10	60	0.167	No
ZNF121		19p13.2	AMP	10	60	0.167	No
ZNF763		19p13.2	AMP	10	60	0.167	No
ZNF700		19p13.2	AMP	10	60	0.167	No
ZNF439		19p13.2	AMP	10	60	0.167	No
UBL5		19p13.2	AMP	10	60	0.167	No
P2RY11		19p13.2	AMP	10	60	0.167	No
SHFL		19p13.2	AMP	10	60	0.167	No
ZGLP1		19p13.2	AMP	10	60	0.167	No
ZNF699		19p13.2	AMP	9	60	0.15	No
ZNF317		19p13.2	AMP	9	60	0.15	No
OR7D2		19p13.2	AMP	9	60	0.15	No
OR7E24		19p13.2	AMP	9	60	0.15	No
OR7D4		19p13.2	AMP	9	60	0.15	No
ZNF177		19p13.2	AMP	9	60	0.15	No
ZNF560		19p13.2	AMP	9	60	0.15	No
ZNF266		19p13.2	AMP	9	60	0.15	No
ZNF559		19p13.2	AMP	9	60	0.15	No
MUC16		19p13.2	AMP	9	60	0.15	No
ZNF490		19p13.2-p13.13	AMP	12	60	0.2	No
QTRT1		19p13.3	AMP	14	60	0.233	No
CCNE1	8.019e-32	19q12	AMP	14	60	0.233	Yes
C19ORF12		19q12	AMP	12	60	0.2	No
PLEKHF1		19q12	AMP	12	60	0.2	No
VSTM2B		19q12	AMP	12	60	0.2	No
POP4		19q12	AMP	12	60	0.2	No
URI1		19q12	AMP	12	60	0.2	No
ZNF536		19q12	AMP	11	60	0.183	No
UQCRFS1		19q12	AMP	10	60	0.167	No
LINC00906		19q12	AMP	9	60	0.15	No
SNORD105B		19q13.2	AMP	10	60	0.167	No
ADAMTSL4		1q21.2	AMP	12	60	0.2	No
MCL1		1q21.2	AMP	12	60	0.2	Yes
TARS2		1q21.2	AMP	11	60	0.183	No
ECM1		1q21.2	AMP	11	60	0.183	No
RPRD2		1q21.2	AMP	9	60	0.15	No
HORMAD1		1q21.3	AMP	14	60	0.233	No
CTSK		1q21.3	AMP	14	60	0.233	No
CTSS		1q21.3	AMP	14	60	0.233	No
GOLPH3L		1q21.3	AMP	14	60	0.233	No
ARNT		1q21.3	AMP	13	60	0.217	Yes
SETDB1		1q21.3	AMP	12	60	0.2	Yes
C1ORF56		1q21.3	AMP	12	60	0.2	No
ZNF687		1q21.3	AMP	12	60	0.2	No
ANXA9		1q21.3	AMP	12	60	0.2	No
BNIPL		1q21.3	AMP	12	60	0.2	No
GABPB2		1q21.3	AMP	12	60	0.2	No
CERS2		1q21.3	AMP	12	60	0.2	No
PSMD4		1q21.3	AMP	12	60	0.2	No
RFX5		1q21.3	AMP	12	60	0.2	No
PRUNE1		1q21.3	AMP	12	60	0.2	No
ENSA		1q21.3	AMP	12	60	0.2	No
PIP5K1A		1q21.3	AMP	12	60	0.2	No
EFNA3		1q21.3	AMP	12	60	0.2	No
DCST1		1q21.3	AMP	12	60	0.2	No
CDC42SE1		1q21.3	AMP	12	60	0.2	No
MINDY1		1q21.3	AMP	12	60	0.2	No
MLLT11		1q21.3	AMP	12	60	0.2	Yes
DCST2		1q21.3	AMP	12	60	0.2	No
PI4KB		1q21.3	AMP	12	60	0.2	No
TMOD4		1q21.3	AMP	11	60	0.183	No
CGN		1q21.3	AMP	11	60	0.183	No
VPS72		1q21.3	AMP	11	60	0.183	No
EFNA4		1q21.3	AMP	11	60	0.183	No
SCNM1		1q21.3	AMP	11	60	0.183	No
PSMB4		1q21.3	AMP	11	60	0.183	No
LYSMD1		1q21.3	AMP	11	60	0.183	No
POGZ		1q21.3	AMP	11	60	0.183	No
SEMA6C		1q21.3	AMP	11	60	0.183	No
SELENBP1		1q21.3	AMP	11	60	0.183	No
ADAM15		1q21.3	AMP	11	60	0.183	No
TNFAIP8L2		1q21.3	AMP	11	60	0.183	No
ZBTB7B		1q21.3	AMP	10	60	0.167	No
RIIAD1		1q21.3	AMP	9	60	0.15	No
TUFT1		1q21.3	AMP	9	60	0.15	No
CELF3		1q21.3	AMP	9	60	0.15	No
SNX27		1q21.3	AMP	9	60	0.15	No
KRTCAP2		1q22	AMP	14	60	0.233	No
THBS3		1q22	AMP	14	60	0.233	No
TRIM46		1q22	AMP	14	60	0.233	No
MUC1		1q22	AMP	14	60	0.233	Yes
MTX1		1q22	AMP	14	60	0.233	No
GBA1LP		1q22	AMP	14	60	0.233	No
RIT1	1.257e-21	1q22	AMP	13	60	0.217	Yes
SNORA80E	1.257e-21	1q22	AMP	13	60	0.217	No
ENTREP3		1q22	AMP	13	60	0.217	No
SCAMP3		1q22	AMP	13	60	0.217	No
MEX3A	1.257e-21	1q22	AMP	13	60	0.217	No
SCARNA4	1.257e-21	1q22	AMP	13	60	0.217	No
GBA1		1q22	AMP	13	60	0.217	No
RXFP4	1.257e-21	1q22	AMP	13	60	0.217	No
KHDC4	1.257e-21	1q22	AMP	13	60	0.217	No
CLK2		1q22	AMP	12	60	0.2	No
SYT11	1.257e-21	1q22	AMP	12	60	0.2	No
SEMA4A	1.257e-21	1q22	AMP	12	60	0.2	No
EFNA1		1q22	AMP	12	60	0.2	No
RAB25	1.257e-21	1q22	AMP	12	60	0.2	No
SSR2	1.257e-21	1q22	AMP	12	60	0.2	No
GON4L	1.257e-21	1q22	AMP	12	60	0.2	No
UBQLN4	1.257e-21	1q22	AMP	12	60	0.2	No
LMNA	1.257e-21	1q22	AMP	12	60	0.2	Yes
ARHGEF2	1.257e-21	1q22	AMP	12	60	0.2	No
HCN3		1q22	AMP	12	60	0.2	No
LAMTOR2	1.257e-21	1q22	AMP	12	60	0.2	No
PKLR		1q22	AMP	11	60	0.183	No
DPM3		1q22	AMP	11	60	0.183	No
FDPS		1q22	AMP	10	60	0.167	No
RUSC1		1q22	AMP	10	60	0.167	No
SLC25A44		1q22	AMP	10	60	0.167	No
RUSC1-AS1		1q22	AMP	10	60	0.167	No
YY1AP1		1q22	AMP	10	60	0.167	Yes
MSTO1		1q22	AMP	9	60	0.15	No
PAQR6		1q22	AMP	9	60	0.15	No
MSTO2P		1q22	AMP	9	60	0.15	No
ASH1L		1q22	AMP	9	60	0.15	No
SLC50A1		1q22	AMP	9	60	0.15	No
PMF1		1q22	AMP	9	60	0.15	No
DAP3		1q22	AMP	9	60	0.15	No
GLMP		1q22	AMP	9	60	0.15	No
BGLAP		1q22	AMP	9	60	0.15	No
SMG5		1q22	AMP	9	60	0.15	No
TMEM79		1q22	AMP	9	60	0.15	No
TTLL9		20q11	AMP	11	60	0.183	No
PLAGL2	1.581e-08	20q11.21	AMP	15	60	0.25	No
TSPY26P	1.581e-08	20q11.21	AMP	15	60	0.25	No
TM9SF4	1.581e-08	20q11.21	AMP	14	60	0.233	No
HCK		20q11.21	AMP	14	60	0.233	No
POFUT1	1.581e-08	20q11.21	AMP	13	60	0.217	No
KIF3B	1.581e-08	20q11.21	AMP	13	60	0.217	No
ASXL1		20q11.21	AMP	13	60	0.217	Yes
CCM2L		20q11.21	AMP	12	60	0.2	No
NOL4L		20q11.21	AMP	12	60	0.2	No
PDRG1		20q11.21	AMP	11	60	0.183	No
XKR7		20q11.21	AMP	11	60	0.183	No
COX4I2		20q11.21	AMP	10	60	0.167	No
FOXS1		20q11.21	AMP	10	60	0.167	No
MYLK2		20q11.21	AMP	10	60	0.167	No
DUSP15		20q11.21	AMP	10	60	0.167	No
BCL2L1		20q11.21	AMP	9	60	0.15	Yes
TPX2		20q11.21	AMP	9	60	0.15	No
ZNF217		20q13.2	AMP	10	60	0.167	Yes
ADRM1		20q13.33	AMP	11	60	0.183	No
LAMA5		20q13.33	AMP	11	60	0.183	No
RBBP8NL		20q13.33	AMP	11	60	0.183	No
CABLES2		20q13.33	AMP	11	60	0.183	No
OSBPL2		20q13.33	AMP	10	60	0.167	No
RPS21		20q13.33	AMP	10	60	0.167	No
GATA5		20q13.33	AMP	9	60	0.15	No
FOSL2		2p23.2	AMP	12	60	0.2	No
PLB1		2p23.2	AMP	12	60	0.2	No
BABAM2		2p23.2	AMP	10	60	0.167	No
TRMT61B		2p23.2	AMP	9	60	0.15	No
SPDYA		2p23.2	AMP	9	60	0.15	No
PPP1CB		2p23.2	AMP	9	60	0.15	Yes
SNORD92		2p23.2	AMP	9	60	0.15	No
WDR43		2p23.2	AMP	9	60	0.15	No
SNORD53		2p23.2	AMP	9	60	0.15	No
IFT172		2p23.3	AMP	9	60	0.15	No
UCN		2p23.3	AMP	9	60	0.15	No
FTH1P3		2p23.3	AMP	9	60	0.15	No
SNX17		2p23.3	AMP	9	60	0.15	No
NRBP1		2p23.3	AMP	9	60	0.15	No
TRIM54		2p23.3	AMP	9	60	0.15	No
GPN1		2p23.3	AMP	9	60	0.15	No
ZNF513		2p23.3	AMP	9	60	0.15	No
MPV17		2p23.3	AMP	9	60	0.15	No
KRTCAP3		2p23.3	AMP	9	60	0.15	No
SPATA31H1		2p23.3	AMP	9	60	0.15	No
GTF3C2		2p23.3	AMP	9	60	0.15	No
PPM1G		2p23.3	AMP	9	60	0.15	No
SUPT7L		2p23.3	AMP	9	60	0.15	No
SLC30A3		2p23.3	AMP	9	60	0.15	No
DNAJC5G		2p23.3	AMP	9	60	0.15	No
FNDC4		2p23.3	AMP	9	60	0.15	No
GCKR		2p23.3	AMP	9	60	0.15	No
CCDC121		2p23.3	AMP	9	60	0.15	No
EIF2B4		2p23.3	AMP	9	60	0.15	No
ZNF512		2p23.3	AMP	9	60	0.15	No
DDX1		2p24.3	AMP	9	60	0.15	No
TM4SF18		3q25.1	AMP	9	60	0.15	No
TM4SF1		3q25.1	AMP	9	60	0.15	No
MBNL1		3q25.1-q25.2	AMP	9	60	0.15	No
RAP2B		3q25.2	AMP	9	60	0.15	No
GPR149		3q25.2	AMP	9	60	0.15	No
TMEM14EP		3q25.2	AMP	9	60	0.15	No
DHX36		3q25.2	AMP	9	60	0.15	No
MME		3q25.2	AMP	9	60	0.15	No
LINC02877		3q25.2	AMP	9	60	0.15	No
ARHGEF26		3q25.2	AMP	9	60	0.15	No
P2RY1		3q25.2	AMP	9	60	0.15	No
PA2G4P4		3q25.31	AMP	10	60	0.167	No
TIPARP		3q25.31	AMP	10	60	0.167	Yes
SSR3		3q25.31	AMP	10	60	0.167	No
KCNAB1		3q25.31	AMP	10	60	0.167	No
SLC33A1		3q25.31	AMP	10	60	0.167	No
GMPS		3q25.31	AMP	10	60	0.167	Yes
C3ORF33		3q25.31	AMP	10	60	0.167	No
CCNL1		3q25.31	AMP	9	60	0.15	No
PLCH1		3q25.31	AMP	9	60	0.15	No
LEKR1		3q25.31	AMP	9	60	0.15	No
VEPH1		3q25.31-q25.32	AMP	9	60	0.15	No
PTX3		3q25.32	AMP	9	60	0.15	No
SLC66A1LP		3q25.32	AMP	9	60	0.15	No
IL12A		3q25.33	AMP	9	60	0.15	No
SERPINI1		3q26.1	AMP	10	60	0.167	No
SI		3q26.1	AMP	10	60	0.167	No
BCHE		3q26.1	AMP	10	60	0.167	No
SLITRK3		3q26.1	AMP	10	60	0.167	No
PDCD10		3q26.1	AMP	9	60	0.15	No
SPTSSB		3q26.1	AMP	9	60	0.15	No
SERPINI2		3q26.1	AMP	9	60	0.15	No
ZBBX		3q26.1	AMP	9	60	0.15	No
WDR49		3q26.1	AMP	9	60	0.15	No
OTOL1		3q26.1	AMP	9	60	0.15	No
ACTRT3	1.12e-35	3q26.2	AMP	22	60	0.367	No
TERC	1.12e-35	3q26.2	AMP	22	60	0.367	Yes
MYNN	1.12e-35	3q26.2	AMP	22	60	0.367	No
LRRC34	1.12e-35	3q26.2	AMP	21	60	0.35	No
LRRIQ4		3q26.2	AMP	20	60	0.333	No
SAMD7		3q26.2	AMP	20	60	0.333	No
MECOM	1.12e-35	3q26.2	AMP	20	60	0.333	Yes
LRRC31		3q26.2	AMP	20	60	0.333	No
EGFEM1P	0	3q26.2	AMP	19	60	0.317	No
SEC62		3q26.2	AMP	18	60	0.3	No
FHL1P1		3q26.2	AMP	18	60	0.3	No
GPR160		3q26.2	AMP	18	60	0.3	No
PHC3		3q26.2	AMP	17	60	0.283	No
SLC2A2		3q26.2	AMP	16	60	0.267	No
PRKCI		3q26.2	AMP	16	60	0.267	Yes
RPL22L1		3q26.2	AMP	16	60	0.267	No
CLDN11		3q26.2	AMP	16	60	0.267	No
SKIL		3q26.2	AMP	16	60	0.267	No
EIF5A2		3q26.2	AMP	16	60	0.267	No
SLC7A14		3q26.2	AMP	16	60	0.267	No
GOLIM4		3q26.2	AMP	10	60	0.167	No
TNIK		3q26.2-q26.31	AMP	16	60	0.267	No
NCEH1		3q26.31	AMP	19	60	0.317	No
TNFSF10		3q26.31	AMP	19	60	0.317	No
GHSR		3q26.31	AMP	19	60	0.317	No
FNDC3B		3q26.31	AMP	18	60	0.3	No
ECT2		3q26.31	AMP	18	60	0.3	No
SPATA16		3q26.31	AMP	16	60	0.267	No
NAALADL2		3q26.31	AMP	16	60	0.267	No
PLD1		3q26.31	AMP	15	60	0.25	No
TMEM212		3q26.31	AMP	15	60	0.25	No
NLGN1		3q26.31	AMP	15	60	0.25	No
ZMAT3		3q26.32	AMP	18	60	0.3	No
KCNMB2		3q26.32	AMP	17	60	0.283	No
KCNMB3		3q26.32	AMP	17	60	0.283	No
TBL1XR1		3q26.32	AMP	17	60	0.283	Yes
PIK3CA		3q26.32	AMP	17	60	0.283	Yes
NDUFB5		3q26.33	AMP	17	60	0.283	No
TTC14		3q26.33	AMP	17	60	0.283	No
CCDC39		3q26.33	AMP	17	60	0.283	No
ZNF639		3q26.33	AMP	17	60	0.283	No
MRPL47		3q26.33	AMP	17	60	0.283	No
MFN1		3q26.33	AMP	17	60	0.283	No
GNB4		3q26.33	AMP	17	60	0.283	No
ACTL6A		3q26.33	AMP	17	60	0.283	No
PEX5L		3q26.33	AMP	17	60	0.283	No
USP13		3q26.33	AMP	17	60	0.283	No
SOX2-OT		3q26.33	AMP	16	60	0.267	No
ATP11B		3q26.33	AMP	16	60	0.267	No
SOX2		3q26.33	AMP	16	60	0.267	Yes
FXR1		3q26.33	AMP	16	60	0.267	No
DNAJC19		3q26.33	AMP	16	60	0.267	No
DCUN1D1		3q26.33	AMP	15	60	0.25	Yes
KLHL6		3q27.1	AMP	15	60	0.25	Yes
MAP6D1		3q27.1	AMP	15	60	0.25	No
KLHL24		3q27.1	AMP	15	60	0.25	No
HTR3D		3q27.1	AMP	15	60	0.25	No
MCCC1		3q27.1	AMP	15	60	0.25	No
MCF2L2		3q27.1	AMP	15	60	0.25	No
ABCC5		3q27.1	AMP	15	60	0.25	No
HTR3C		3q27.1	AMP	15	60	0.25	No
DVL3		3q27.1	AMP	15	60	0.25	No
YEATS2		3q27.1	AMP	15	60	0.25	No
B3GNT5		3q27.1	AMP	15	60	0.25	No
LAMP3		3q27.1	AMP	15	60	0.25	No
HTR3E		3q27.1	AMP	15	60	0.25	No
PARL		3q27.1	AMP	15	60	0.25	No
EIF2B5		3q27.1	AMP	15	60	0.25	No
AP2M1		3q27.1	AMP	14	60	0.233	No
PSMD2		3q27.1	AMP	14	60	0.233	No
CLCN2		3q27.1	AMP	14	60	0.233	No
FAM131A		3q27.1	AMP	14	60	0.233	No
MAGEF1		3q27.1	AMP	14	60	0.233	No
THPO		3q27.1	AMP	14	60	0.233	No
EPHB3		3q27.1	AMP	14	60	0.233	No
EIF4G1		3q27.1	AMP	14	60	0.233	No
POLR2H		3q27.1	AMP	14	60	0.233	No
VWA5B2		3q27.1	AMP	14	60	0.233	No
ALG3		3q27.1	AMP	14	60	0.233	No
SNORD66		3q27.1	AMP	14	60	0.233	No
ECE2		3q27.1	AMP	14	60	0.233	No
CHRD		3q27.1	AMP	14	60	0.233	No
ABCF3		3q27.1	AMP	14	60	0.233	No
CAMK2N2		3q27.1	AMP	14	60	0.233	No
ETV5		3q27.2	AMP	14	60	0.233	Yes
VPS8		3q27.2	AMP	14	60	0.233	No
EHHADH		3q27.2	AMP	14	60	0.233	No
IGF2BP2-AS1		3q27.2	AMP	14	60	0.233	No
LIPH		3q27.2	AMP	14	60	0.233	No
SENP2		3q27.2	AMP	14	60	0.233	No
MAP3K13		3q27.2	AMP	14	60	0.233	Yes
TRA2B		3q27.2	AMP	14	60	0.233	No
IGF2BP2		3q27.2	AMP	14	60	0.233	No
TMEM41A		3q27.2	AMP	14	60	0.233	No
C3ORF70		3q27.2	AMP	14	60	0.233	No
DGKG		3q27.2-q27.3	AMP	14	60	0.233	No
RTP2		3q27.3	AMP	13	60	0.217	No
RPL39L		3q27.3	AMP	13	60	0.217	No
TBCCD1		3q27.3	AMP	13	60	0.217	No
SNORA63		3q27.3	AMP	13	60	0.217	No
RFC4		3q27.3	AMP	13	60	0.217	No
AHSG		3q27.3	AMP	13	60	0.217	No
RTP4		3q27.3	AMP	13	60	0.217	No
MASP1		3q27.3	AMP	13	60	0.217	No
ADIPOQ		3q27.3	AMP	13	60	0.217	No
HRG		3q27.3	AMP	13	60	0.217	No
EIF4A2		3q27.3	AMP	13	60	0.217	Yes
SST		3q27.3	AMP	13	60	0.217	No
DNAJB11		3q27.3	AMP	13	60	0.217	No
BCL6		3q27.3	AMP	13	60	0.217	Yes
FETUB		3q27.3	AMP	13	60	0.217	No
SNORA81		3q27.3	AMP	13	60	0.217	No
RTP1		3q27.3	AMP	13	60	0.217	No
SNORA4		3q27.3	AMP	13	60	0.217	No
SNORD2		3q27.3	AMP	13	60	0.217	No
KNG1		3q27.3	AMP	13	60	0.217	No
CRYGS		3q27.3	AMP	13	60	0.217	No
ST6GAL1		3q27.3	AMP	13	60	0.217	No
LPP		3q27.3-q28	AMP	14	60	0.233	Yes
CLDN16		3q28	AMP	15	60	0.25	No
IL1RAP		3q28	AMP	15	60	0.25	No
SNAR-I		3q28	AMP	15	60	0.25	No
TMEM207		3q28	AMP	15	60	0.25	No
CLDN1		3q28	AMP	15	60	0.25	No
TPRG1		3q28	AMP	15	60	0.25	No
P3H2		3q28	AMP	15	60	0.25	No
CCDC50		3q28	AMP	14	60	0.233	No
PYDC2		3q28	AMP	14	60	0.233	No
OSTN		3q28	AMP	14	60	0.233	No
UTS2B		3q28	AMP	14	60	0.233	No
TP63		3q28	AMP	14	60	0.233	Yes
FGF12		3q28-q29	AMP	14	60	0.233	Yes
TFRC		3q29	AMP	17	60	0.283	Yes
TNK2		3q29	AMP	17	60	0.283	No
PPP1R2		3q29	AMP	17	60	0.283	No
MUC4		3q29	AMP	17	60	0.283	No
HES1		3q29	AMP	17	60	0.283	No
LINC00887		3q29	AMP	17	60	0.283	No
SDHAP1		3q29	AMP	17	60	0.283	No
MUC20		3q29	AMP	17	60	0.283	No
SDHAP2		3q29	AMP	17	60	0.283	No
APOD		3q29	AMP	17	60	0.283	No
CPN2		3q29	AMP	16	60	0.267	No
OPA1		3q29	AMP	16	60	0.267	No
ACAP2		3q29	AMP	16	60	0.267	No
LRRC15		3q29	AMP	16	60	0.267	No
SDHAP4		3q29	AMP	16	60	0.267	No
ZDHHC19		3q29	AMP	16	60	0.267	No
XXYLT1		3q29	AMP	16	60	0.267	No
ATP13A4		3q29	AMP	16	60	0.267	No
PAK2		3q29	AMP	15	60	0.25	No
PIGX		3q29	AMP	15	60	0.25	No
UBXN7		3q29	AMP	15	60	0.25	No
CEP19		3q29	AMP	15	60	0.25	No
TMEM44		3q29	AMP	15	60	0.25	No
SMCO1		3q29	AMP	15	60	0.25	No
FAM43A		3q29	AMP	15	60	0.25	No
PIGZ		3q29	AMP	15	60	0.25	No
PLAAT1		3q29	AMP	15	60	0.25	No
NCBP2AS2		3q29	AMP	15	60	0.25	No
DLG1		3q29	AMP	15	60	0.25	No
GP5		3q29	AMP	15	60	0.25	No
MELTF		3q29	AMP	15	60	0.25	No
BDH1		3q29	AMP	15	60	0.25	No
ATP13A3		3q29	AMP	15	60	0.25	No
NCBP2		3q29	AMP	15	60	0.25	No
NRROS		3q29	AMP	15	60	0.25	No
ATP13A5		3q29	AMP	15	60	0.25	No
SENP5		3q29	AMP	15	60	0.25	No
SLC51A		3q29	AMP	15	60	0.25	No
RNF168		3q29	AMP	15	60	0.25	No
LSG1		3q29	AMP	15	60	0.25	No
RUBCN		3q29	AMP	15	60	0.25	No
LRCH3		3q29	AMP	14	60	0.233	No
FAM157A		3q29	AMP	14	60	0.233	No
RPL35A		3q29	AMP	14	60	0.233	No
LMLN		3q29	AMP	14	60	0.233	No
MB21D2		3q29	AMP	14	60	0.233	No
DYNLT2B		3q29	AMP	14	60	0.233	No
WDR53		3q29	AMP	14	60	0.233	No
IQCG		3q29	AMP	14	60	0.233	No
TM4SF19		3q29	AMP	14	60	0.233	No
FYTTD1		3q29	AMP	14	60	0.233	No
PCYT1A		3q29	AMP	14	60	0.233	No
FBXO45		3q29	AMP	14	60	0.233	No
SLC1A3		5p13.2	AMP	12	60	0.2	No
RANBP3L		5p13.2	AMP	11	60	0.183	No
NADK2		5p13.2	AMP	10	60	0.167	No
LMBRD2		5p13.2	AMP	9	60	0.15	No
SKP2		5p13.2	AMP	9	60	0.15	No
UGT3A2		5p13.2	AMP	9	60	0.15	No
UGT3A1		5p13.2	AMP	9	60	0.15	No
CDH6		5p13.3	AMP	9	60	0.15	No
NPR3		5p13.3	AMP	9	60	0.15	No
PDZD2		5p13.3	AMP	9	60	0.15	No
DROSHA		5p13.3	AMP	9	60	0.15	Yes
MTMR12		5p13.3	AMP	9	60	0.15	No
SUB1		5p13.3	AMP	9	60	0.15	No
ZFR		5p13.3	AMP	9	60	0.15	No
C5ORF22		5p13.3	AMP	9	60	0.15	No
GOLPH3		5p13.3	AMP	9	60	0.15	No
NKX6-3		8p11.21	AMP	12	60	0.2	No
ANK1	2.215e-10	8p11.21	AMP	12	60	0.2	No
AP3M2	2.215e-10	8p11.21	AMP	11	60	0.183	No
KAT6A	2.215e-10	8p11.21	AMP	11	60	0.183	Yes
GPAT4		8p11.21	AMP	10	60	0.167	No
PLAT	2.215e-10	8p11.21	AMP	10	60	0.167	No
CHRNB3		8p11.21	AMP	9	60	0.15	No
IKBKB		8p11.21	AMP	9	60	0.15	Yes
GINS4		8p11.21	AMP	9	60	0.15	No
DKK4		8p11.21	AMP	9	60	0.15	Yes
GOLGA7		8p11.21	AMP	9	60	0.15	No
POLB		8p11.21	AMP	9	60	0.15	No
SFRP1		8p11.21	AMP	9	60	0.15	Yes
CHRNA6		8p11.21	AMP	9	60	0.15	No
SLC20A2		8p11.21	AMP	9	60	0.15	No
VDAC3		8p11.21	AMP	9	60	0.15	No
TM2D2		8p11.22	AMP	9	60	0.15	No
HTRA4		8p11.22	AMP	9	60	0.15	No
SOX17		8q11.23	AMP	12	60	0.2	Yes
NDUFB9		8q24.13	AMP	11	60	0.183	No
WASHC5		8q24.13	AMP	11	60	0.183	No
TRMT12		8q24.13	AMP	11	60	0.183	No
MTSS1		8q24.13	AMP	11	60	0.183	No
RNF139		8q24.13	AMP	11	60	0.183	No
TATDN1		8q24.13	AMP	11	60	0.183	No
SQLE		8q24.13	AMP	11	60	0.183	No
LINC00964		8q24.13	AMP	11	60	0.183	No
ZNF572		8q24.13	AMP	11	60	0.183	No
TRIB1		8q24.13	AMP	10	60	0.167	No
TMEM65		8q24.13	AMP	10	60	0.167	No
NSMCE2		8q24.13	AMP	10	60	0.167	No
FAM83A		8q24.13	AMP	9	60	0.15	No
FER1L6		8q24.13	AMP	9	60	0.15	No
FAM83A-AS1		8q24.13	AMP	9	60	0.15	No
DERL1		8q24.13	AMP	9	60	0.15	No
TBC1D31		8q24.13	AMP	9	60	0.15	No
ZHX2		8q24.13	AMP	9	60	0.15	No
MYC	9.556e-38	8q24.21	AMP	14	60	0.233	Yes
PVT1		8q24.21	AMP	12	60	0.2	No
CYRIB		8q24.21	AMP	10	60	0.167	No
GSDMC		8q24.21	AMP	10	60	0.167	No
CASC8		8q24.21	AMP	10	60	0.167	No
POU5F1B		8q24.21	AMP	10	60	0.167	No
LRATD2		8q24.21	AMP	9	60	0.15	No
ASAP1		8q24.21-q24.22	AMP	9	60	0.15	No
DENND3		8q24.3	AMP	10	60	0.167	No
PTK2		8q24.3	AMP	9	60	0.15	No
CLCF1	9.072e-06	11q13.2	AMP	8	60	0.133	No
ZNF251		8q24.3	AMP	8	60	0.133	No
PAX8-AS1		2q14.1	AMP	8	60	0.133	No
RPL8		8q24.3	AMP	8	60	0.133	No
CCT3		1q22	AMP	8	60	0.133	No
SLC45A4		8q24.3	AMP	8	60	0.133	No
SERP1		3q25.1	AMP	8	60	0.133	No
MTG2		20q13.33	AMP	8	60	0.133	No
WWTR1		3q25.1	AMP	8	60	0.133	Yes
CPSF1		8q24.3	AMP	8	60	0.133	No
PPM1L		3q25.33-q26.1	AMP	8	60	0.133	No
SS18L1		20q13.33	AMP	8	60	0.133	Yes
CLRN1-AS1		3q25.1	AMP	8	60	0.133	No
RARRES1		3q25.32	AMP	8	60	0.133	No
MED12L		3q25.1	AMP	8	60	0.133	No
AADACL2		3q25.1	AMP	8	60	0.133	No
GPR152		11q13.2	AMP	8	60	0.133	No
PPP1R16A		8q24.3	AMP	8	60	0.133	No
DEPTOR		8q24.12	AMP	8	60	0.133	No
LRRC24		8q24.3	AMP	8	60	0.133	No
RBBP5		1q32.1	AMP	8	60	0.133	No
CARNS1	9.072e-06	11q13.2	AMP	8	60	0.133	No
MIR9-1HG		1q22	AMP	8	60	0.133	No
KIFC2		8q24.3	AMP	8	60	0.133	No
RPL41		12q13	AMP	8	60	0.133	No
CDH10		5p14.2-p14.1	AMP	8	60	0.133	No
TM4SF4		3q25.1	AMP	8	60	0.133	No
KAT6B		10q22.2	AMP	8	60	0.133	Yes
DGAT1		8q24.3	AMP	8	60	0.133	No
TMEM134		11q13.2	AMP	8	60	0.133	No
ZMYND8	8.774e-07	20q13.12	AMP	8	60	0.133	No
SPEF2		5p13.2	AMP	8	60	0.133	No
PARP10		8q24.3	AMP	8	60	0.133	No
GRHL1		2p25.1	AMP	8	60	0.133	No
MRPL12		17q25.3	AMP	8	60	0.133	No
SCHIP1		3q25.33	AMP	8	60	0.133	No
ZC3H10		12q13.2	AMP	8	60	0.133	No
LYPLA1		8q11.23	AMP	8	60	0.133	No
ITGAL		16p11.2	AMP	8	60	0.133	No
MYCN		2p24.3	AMP	8	60	0.133	Yes
ZNF250		8q24.3	AMP	8	60	0.133	No
DUSP13B		10q22.2	AMP	8	60	0.133	No
ADPRS		1p34.3	AMP	8	60	0.133	No
BRIX1		5p13.2	AMP	8	60	0.133	No
C1QTNF3		5p13.2	AMP	8	60	0.133	No
RAD1		5p13.2	AMP	8	60	0.133	No
IFT80		3q25.33	AMP	8	60	0.133	No
CKS1B		1q21.3	AMP	8	60	0.133	Yes
COL8A2		1p34.3	AMP	8	60	0.133	No
TRIM59		3q25.33	AMP	8	60	0.133	No
TBC1D10C	9.072e-06	11q13.2	AMP	8	60	0.133	No
IL7R		5p13.2	AMP	8	60	0.133	Yes
MIF4GD		17q25.1	AMP	8	60	0.133	No
RECQL4		8q24.3	AMP	8	60	0.133	Yes
RPS6KB2	9.072e-06	11q13.2	AMP	8	60	0.133	Yes
CNTN2		1q32.1	AMP	8	60	0.133	No
RSRC1		3q25.32	AMP	8	60	0.133	No
AMACR		5p13.2	AMP	8	60	0.133	No
THAP1		8p11.21	AMP	8	60	0.133	No
FBXL6		8q24.3	AMP	8	60	0.133	No
MFSD1		3q25.32	AMP	8	60	0.133	No
TCEA1		8q11.23	AMP	8	60	0.133	Yes
WDR35		2p24.1	AMP	8	60	0.133	No
GPR87		3q25.1	AMP	8	60	0.133	No
MFSD3		8q24.3	AMP	8	60	0.133	No
AADACP1		3q25.1	AMP	8	60	0.133	No
NMD3		3q26.1	AMP	8	60	0.133	No
TONSL		8q24.3	AMP	8	60	0.133	Yes
LRRC14		8q24.3	AMP	8	60	0.133	No
EIF2A		3q25.1	AMP	8	60	0.133	No
MRPL33		2p23.2	AMP	8	60	0.133	No
WDR97		8q24.3	AMP	8	60	0.133	No
LXN		3q25.32	AMP	8	60	0.133	No
TMEM249		8q24.3	AMP	8	60	0.133	No
PUM2		2p24.1	AMP	8	60	0.133	No
RAD9A	9.072e-06	11q13.2	AMP	8	60	0.133	No
HRH3		20q13.33	AMP	8	60	0.133	No
CABP4		11q13.2	AMP	8	60	0.133	No
FAAP100		17q25.3	AMP	8	60	0.133	No
EXOSC4		8q24.3	AMP	8	60	0.133	No
PRLR		5p13.2	AMP	8	60	0.133	No
SMC4		3q25.33	AMP	8	60	0.133	No
ZHX1		8q24.13	AMP	8	60	0.133	No
ARL14		3q25.33	AMP	8	60	0.133	No
CEP89		19q13.11	AMP	8	60	0.133	No
TSACC		1q22	AMP	8	60	0.133	No
RXFP3		5p13.2	AMP	8	60	0.133	No
VPS28		8q24.3	AMP	8	60	0.133	No
RHBG		1q22	AMP	8	60	0.133	No
C8ORF76		8q24.13	AMP	8	60	0.133	No
SLC45A2		5p13.2	AMP	8	60	0.133	No
TEKT2		1p34.3	AMP	8	60	0.133	No
ID1		20q11.21	AMP	8	60	0.133	Yes
TACC1		8p11.22	AMP	8	60	0.133	No
RNF13		3q25.1	AMP	8	60	0.133	No
PTPRCAP	9.072e-06	11q13.2	AMP	8	60	0.133	No
NTAQ1		8q24.13	AMP	8	60	0.133	No
GRINA		8q24.3	AMP	8	60	0.133	No
TSPAN10		17q25.3	AMP	8	60	0.133	No
COMMD2		3q25.1	AMP	8	60	0.133	No
IDO2		8p11.21	AMP	8	60	0.133	No
AADAC		3q25.1	AMP	8	60	0.133	No
RAI14		5p13.2	AMP	8	60	0.133	No
NIPBL		5p13.2	AMP	8	60	0.133	No
ERICH6		3q25.1	AMP	8	60	0.133	No
PLEKHF2		8q22.1	AMP	8	60	0.133	No
ZNF34		8q24.3	AMP	8	60	0.133	No
TCIM		8p11.21	AMP	8	60	0.133	No
HPS3		3q24	AMP	8	60	0.133	No
C8ORF33		8q24.3	AMP	8	60	0.133	No
AGXT2		5p13.2	AMP	8	60	0.133	No
SLC4A1AP		2p23.3	AMP	8	60	0.133	No
SAMD8		10q22.2	AMP	8	60	0.133	No
DNAJC21		5p13.2	AMP	8	60	0.133	No
HSF1		8q24.3	AMP	8	60	0.133	No
MRPL9		1q21.3	AMP	8	60	0.133	No
TTC23L		5p13.2	AMP	8	60	0.133	No
TARS1		5p13.3	AMP	8	60	0.133	No
OR1M1		19p13.2	AMP	8	60	0.133	No
OR7G1		19p13.2	AMP	8	60	0.133	No
ATAD2		8q24.13	AMP	8	60	0.133	No
POLD4	9.072e-06	11q13.2	AMP	8	60	0.133	No
TAF1B		2p25.1	AMP	8	60	0.133	No
HGS		17q25.3	AMP	8	60	0.133	No
PAX8	2.429e-11	2q14.1	AMP	8	60	0.133	Yes
SMIM19		8p11.21	AMP	8	60	0.133	No
NPLOC4		17q25.3	AMP	8	60	0.133	No
COMTD1		10q22.2	AMP	8	60	0.133	No
SELENOT		3q25.1	AMP	8	60	0.133	No
OXLD1		17q25.3	AMP	8	60	0.133	No
RNF5P1		8p11.22	AMP	8	60	0.133	No
FBXO32		8q24.13	AMP	8	60	0.133	No
ZMAT4		8p11.21	AMP	8	60	0.133	No
PLEC		8q24.3	AMP	8	60	0.133	No
EBAG9		8q23.2	AMP	8	60	0.133	No
ITSN2		2p23.3	AMP	8	60	0.133	No
CA4		17q23.1	AMP	8	60	0.133	No
FSCN2		17q25.3	AMP	8	60	0.133	No
CRMA		20q13.33	AMP	8	60	0.133	No
ZFTRAF1		8q24.3	AMP	8	60	0.133	No
OR7G3		19p13.2	AMP	8	60	0.133	No
FOXH1		8q24.3	AMP	8	60	0.133	No
OR7G2		19p13.2	AMP	8	60	0.133	No
PFN2		3q25.1	AMP	8	60	0.133	No
SLC7A9		19q13.11	AMP	8	60	0.133	No
MATN3		2p24.1	AMP	8	60	0.133	No
SYBU		8q23.2	AMP	8	60	0.133	No
ACTG1		17q25.3	AMP	8	60	0.133	Yes
SLC52A2		8q24.3	AMP	8	60	0.133	No
CCDC137		17q25.3	AMP	8	60	0.133	No
ARL16		17q25.3	AMP	8	60	0.133	No
SLC39A4		8q24.3	AMP	8	60	0.133	No
OPLAH		8q24.3	AMP	8	60	0.133	No
ZNF785		16p11.2	AMP	8	60	0.133	No
KLHL38		8q24.13	AMP	8	60	0.133	No
FLAD1		1q21.3	AMP	8	60	0.133	No
PLEKHA2		8p11.22	AMP	8	60	0.133	No
ADCK5		8q24.3	AMP	8	60	0.133	No
BOP1		8q24.3	AMP	8	60	0.133	No
GFM1		3q25.32	AMP	8	60	0.133	No
LENEP		1q21.3	AMP	8	60	0.133	No
ZNF517		8q24.3	AMP	8	60	0.133	No
C20ORF203		20q11.21	AMP	8	60	0.133	No
NRBP2		8q24.3	AMP	8	60	0.133	No
B3GALNT1		3q26.1	AMP	8	60	0.133	No
ZNF252P		8q24.3	AMP	8	60	0.133	No
TMED10P1		8q24.3	AMP	8	60	0.133	No
ZNF252P-AS1		8q24.3	AMP	8	60	0.133	No
PPP1CA	9.072e-06	11q13.2	AMP	8	60	0.133	No
ADAMTS12		5p13.3-p13.2	AMP	8	60	0.133	No
CORO1B	9.072e-06	11q13.2	AMP	8	60	0.133	No
ZNF506		19p13.11	AMP	8	60	0.133	No
MLF1		3q25.32	AMP	8	60	0.133	Yes
TDRKH		1q21.3	AMP	8	60	0.133	No
MRPS7		17q25.1	AMP	8	60	0.133	No
COMMD5		8q24.3	AMP	8	60	0.133	No
OAZ3		1q21.3	AMP	8	60	0.133	No
SCARNA7		3q25.22	AMP	8	60	0.133	No
P2RY13		3q25.1	AMP	8	60	0.133	No
GPT		8q24.3	AMP	8	60	0.133	No
VHLL		1q22	AMP	8	60	0.133	No
PKHD1L1		8q23.1-q23.2	AMP	8	60	0.133	No
CLRN1		3q25.1	AMP	8	60	0.133	No
GPAA1		8q24.3	AMP	8	60	0.133	No
RGS20		8q11.23	AMP	8	60	0.133	No
P2RY14		3q25.1	AMP	8	60	0.133	No
DUSP29		10q22.2	AMP	8	60	0.133	No
HLTF		3q24	AMP	8	60	0.133	No
MYCNOS		2p24.3	AMP	8	60	0.133	No
CFAP418		8q22.1	AMP	8	60	0.133	No
ARHGAP39		8q24.3	AMP	8	60	0.133	No
TSC22D2		3q25.1	AMP	8	60	0.133	No
ANXA13		8q24.13	AMP	8	60	0.133	No
PDE6G		17q25.3	AMP	8	60	0.133	No
MRPL15		8q11.23	AMP	8	60	0.133	No
ADAM18		8p11.22	AMP	8	60	0.133	No
TSHZ3		19q12	AMP	8	60	0.133	No
VDAC2		10q22.2	AMP	8	60	0.133	No
KPNA4		3q25.33	AMP	8	60	0.133	No
SHOX2		3q25.32	AMP	8	60	0.133	No
SIAH2		3q25.1	AMP	8	60	0.133	No
SCRT1		8q24.3	AMP	8	60	0.133	No
EPPK1		8q24.3	AMP	8	60	0.133	No
LAPTM4B		8q22.1	AMP	8	60	0.133	No
ADAM2		8p11.22	AMP	8	60	0.133	No
CAPSL		5p13.2	AMP	8	60	0.133	No
ANKUB1		3q25.1	AMP	8	60	0.133	No
SPATC1		8q24.3	AMP	8	60	0.133	No
ADAM9		8p11.22	AMP	8	60	0.133	No
MBD3L1		19p13.2	AMP	8	60	0.133	No
IRF2BP2	2.514e-07	1q42.3	AMP	8	60	0.133	No
ZNF7		8q24.3	AMP	8	60	0.133	No
FAM91A1		8q24.13	AMP	8	60	0.133	No
SUCNR1		3q25.1	AMP	8	60	0.133	No
TDRD12		19q13.11	AMP	8	60	0.133	No
IQCJ		3q25.32	AMP	8	60	0.133	No
ASAP1-IT1		8q24.21	AMP	8	60	0.133	No
TMEM81		1q32.1	AMP	8	60	0.133	No
SLC25A10		17q25.3	AMP	8	60	0.133	No
ZNF16		8q24.3	AMP	8	60	0.133	No
PA2G4		12q13.2	AMP	8	60	0.133	No
GPR171		3q25.1	AMP	8	60	0.133	No
IGSF10		3q25.1	AMP	8	60	0.133	No
P2RY12		3q25.1	AMP	8	60	0.133	No
MROH1		8q24.3	AMP	8	60	0.133	No
MIR1-1HG		20q13.33	AMP	8	60	0.133	No
TOGARAM2		2p23.2	AMP	8	60	0.133	No
CP		3q24-q25.1	AMP	8	60	0.133	No
RBKS		2p23.2	AMP	8	60	0.133	No
SLC25A19		17q25.1	AMP	8	60	0.133	No
SDC1		2p24.1	AMP	8	60	0.133	No
ZNF512B	0.000164	20q13.33	AMP	7	60	0.117	No
THEM5		1q21.3	AMP	7	60	0.117	No
ADAR		1q21.3	AMP	7	60	0.117	No
ZNF737		19p12	AMP	7	60	0.117	No
SLC35F6		2p23.3	AMP	7	60	0.117	No
ALK		2p23.2-p23.1	AMP	7	60	0.117	Yes
SAMD10	0.000164	20q13.33	AMP	7	60	0.117	No
ABHD16B	0.000164	20q13.33	AMP	7	60	0.117	No
ATRAID		2p23.3	AMP	7	60	0.117	No
ADCY3		2p23.3	AMP	7	60	0.117	No
CENPO		2p23.3	AMP	7	60	0.117	No
RAB37		17q25.1	AMP	7	60	0.117	No
PITPNM1		11q13.2	AMP	7	60	0.117	No
C2CD4D		1q21.3	AMP	7	60	0.117	No
CYS1		2p25.1	AMP	7	60	0.117	No
UCKL1	0.000164	20q13.33	AMP	7	60	0.117	No
SSH3		11q13.2	AMP	7	60	0.117	No
ADCY8		8q24.22	AMP	7	60	0.117	No
MYL11		16p11.2	AMP	7	60	0.117	No
APH1A		1q21.2	AMP	7	60	0.117	Yes
TNFRSF11B		8q24.12	AMP	7	60	0.117	No
EIF3E		8q23.1	AMP	7	60	0.117	Yes
LAPTM4A		2p24.1	AMP	7	60	0.117	No
KCNK3		2p23.3	AMP	7	60	0.117	No
TTC33		5p13.1	AMP	7	60	0.117	No
H1-10-AS1		3q21.3	AMP	7	60	0.117	No
RHOB		2p24.1	AMP	7	60	0.117	No
RAD51AP2		2p24.2	AMP	7	60	0.117	No
TBC1D10B		16p11.2	AMP	7	60	0.117	No
NUP85		17q25.1	AMP	7	60	0.117	No
KIF3C		2p23.3	AMP	7	60	0.117	No
ZNF503		10q22.2	AMP	7	60	0.117	No
KHK		2p23.3	AMP	7	60	0.117	No
KCNS3		2p24.2	AMP	7	60	0.117	No
RPL30		8q22.2	AMP	7	60	0.117	No
OPRL1	0.000164	20q13.33	AMP	7	60	0.117	No
S100A10		1q21.3	AMP	7	60	0.117	No
MAL2		8q24.12	AMP	7	60	0.117	Yes
S100A11		1q21.3	AMP	7	60	0.117	No
DCTPP1		16p11.2	AMP	7	60	0.117	No
CDH12		5p14.3	AMP	7	60	0.117	No
CABP2		11q13.2	AMP	7	60	0.117	No
CHRNB2		1q21.3	AMP	7	60	0.117	No
CDH9		5p14.1	AMP	7	60	0.117	No
NUP155		5p13.2	AMP	7	60	0.117	No
ZBTB10		8q21.13	AMP	7	60	0.117	No
LINC01300		8q24.3	AMP	7	60	0.117	No
BRD9	0.0001119	5p15.33	AMP	7	60	0.117	No
ZNF253		19p13.11	AMP	7	60	0.117	No
NEDD9	1.464e-09	6p24.2	AMP	7	60	0.117	No
RPL37		5p13.1	AMP	7	60	0.117	No
ZNF771		16p11.2	AMP	7	60	0.117	No
DEFB124		20q11.21	AMP	7	60	0.117	No
NBAS		2p24.3	AMP	7	60	0.117	No
NPR1		1q21.3	AMP	7	60	0.117	No
CIB4		2p23.3	AMP	7	60	0.117	No
NTSR2		2p25.1	AMP	7	60	0.117	No
FAM228A		2p23.3	AMP	7	60	0.117	No
RPTN		1q21.3	AMP	7	60	0.117	No
TCHHL1		1q21.3	AMP	7	60	0.117	No
ZGPAT	0.000164	20q13.33	AMP	7	60	0.117	No
LIME1	0.000164	20q13.33	AMP	7	60	0.117	No
ZACN		17q25.1	AMP	7	60	0.117	No
BPNT2		8q12.1	AMP	7	60	0.117	No
RICTOR		5p13.1	AMP	7	60	0.117	Yes
PYGO2		1q21.3	AMP	7	60	0.117	No
MCRIP1		17q25.3	AMP	7	60	0.117	No
LRRC14B	0.0001119	5p15.33	AMP	7	60	0.117	No
CLPTM1L	0.0001119	5p15.33	AMP	7	60	0.117	No
COLEC10		8q24.12	AMP	7	60	0.117	No
UCKL1-AS1	0.000164	20q13.33	AMP	7	60	0.117	No
KLF11		2p25.1	AMP	7	60	0.117	No
THEM4		1q21.3	AMP	7	60	0.117	No
LEMD1		1q32.1	AMP	7	60	0.117	No
NOL10		2p25.1	AMP	7	60	0.117	No
EVPL		17q25.1	AMP	7	60	0.117	No
CENPA		2p23.3	AMP	7	60	0.117	Yes
CPSF3		2p25.1	AMP	7	60	0.117	No
ZNF486		19p12	AMP	7	60	0.117	No
TERT	0.0001119	5p15.33	AMP	7	60	0.117	Yes
TCEA2	0.000164	20q13.33	AMP	7	60	0.117	No
OSR1		2p24.1	AMP	7	60	0.117	No
CCDC127	0.0001119	5p15.33	AMP	7	60	0.117	No
AGTR1		3q24	AMP	7	60	0.117	No
ACTR2P2		19p12	AMP	7	60	0.117	No
RDH14		2p24.2	AMP	7	60	0.117	No
TP53I3		2p23.3	AMP	7	60	0.117	No
MFSD4A-AS1		1q32.1	AMP	7	60	0.117	No
FGFR1		8p11.23	AMP	7	60	0.117	Yes
RORC		1q21.3	AMP	7	60	0.117	No
ZNF626		19p12	AMP	7	60	0.117	No
ELK4		1q32.1	AMP	7	60	0.117	Yes
MYT1	0.000164	20q13.33	AMP	7	60	0.117	No
AHCY		20q11.22	AMP	7	60	0.117	No
GREB1		2p25.1	AMP	7	60	0.117	No
RGS19	0.000164	20q13.33	AMP	7	60	0.117	No
LKAAEAR1	0.000164	20q13.33	AMP	7	60	0.117	No
CYRIA		2p24.2	AMP	7	60	0.117	No
CEP72	0.0001119	5p15.33	AMP	7	60	0.117	No
ZNF682		19p12	AMP	7	60	0.117	No
EMC2		8q23.1	AMP	7	60	0.117	No
PTGER4		5p13.1	AMP	7	60	0.117	No
TPD52L2	0.000164	20q13.33	AMP	7	60	0.117	No
TSNARE1		8q24.3	AMP	7	60	0.117	No
PTK6	0.000164	20q13.33	AMP	7	60	0.117	Yes
ABRA		8q23.1	AMP	7	60	0.117	No
FKBP1B		2p23.3	AMP	7	60	0.117	No
MCTS2		20q11.21	AMP	7	60	0.117	No
UBXN2A		2p23.3	AMP	7	60	0.117	No
POMK		8p11.21	AMP	7	60	0.117	No
NACA4P		8q22.3	AMP	7	60	0.117	No
CHTOP		1q21.3	AMP	7	60	0.117	No
TRIP13	0.0001119	5p15.33	AMP	7	60	0.117	Yes
PLEKHG4B	0.0001119	5p15.33	AMP	7	60	0.117	No
AGO2		8q24.3	AMP	7	60	0.117	Yes
SLCO4A1		20q13.33	AMP	7	60	0.117	No
LETM2		8p11.23	AMP	7	60	0.117	No
MAP7D1		1p34.3	AMP	7	60	0.117	No
TCHH		1q21.3	AMP	7	60	0.117	No
LDAH		2p24.1	AMP	7	60	0.117	No
EMILIN1		2p23.3	AMP	7	60	0.117	No
GEN1		2p24.2	AMP	7	60	0.117	Yes
CIART		1q21.2	AMP	7	60	0.117	No
ESYT1		12q13.2	AMP	7	60	0.117	No
LINC03042		8p11.22	AMP	7	60	0.117	No
HS1BP3		2p24.1	AMP	7	60	0.117	No
SLC6A19	0.0001119	5p15.33	AMP	7	60	0.117	No
HPCAL1		2p25.1	AMP	7	60	0.117	No
KLHL29		2p24.1	AMP	7	60	0.117	No
AGBL5		2p23.3	AMP	7	60	0.117	No
DBR1		3q22.3	AMP	7	60	0.117	No
ANKRD27		19q13.11	AMP	7	60	0.117	No
VKORC1		16p11.2	AMP	7	60	0.117	No
PPDPF	0.000164	20q13.33	AMP	7	60	0.117	No
ZNF430		19p12	AMP	7	60	0.117	No
SRMS	0.000164	20q13.33	AMP	7	60	0.117	No
PREB		2p23.3	AMP	7	60	0.117	No
DNAJC27		2p23.3	AMP	7	60	0.117	No
A4GNT		3q22.3	AMP	7	60	0.117	No
ZNF826P		19p12	AMP	7	60	0.117	No
C20ORF204	0.000164	20q13.33	AMP	7	60	0.117	No
ARMC8		3q22.3	AMP	7	60	0.117	No
ROCK2		2p25.1	AMP	7	60	0.117	No
SRP68		17q25.1	AMP	7	60	0.117	No
TMEM214		2p23.3	AMP	7	60	0.117	No
DTNB		2p23.3	AMP	7	60	0.117	No
HGSNAT		8p11.21-p11.1	AMP	7	60	0.117	No
KIDINS220		2p25.1	AMP	7	60	0.117	No
ID2		2p25.1	AMP	7	60	0.117	No
ERBB3	1.828e-09	12q13.2	AMP	7	60	0.117	Yes
AHRR	0.0001119	5p15.33	AMP	7	60	0.117	No
ADAM17		2p25.1	AMP	7	60	0.117	No
PDCD6	0.0001119	5p15.33	AMP	7	60	0.117	No
GPATCH1		19q13.11	AMP	7	60	0.117	No
PSD4		2q14.1	AMP	7	60	0.117	No
SNAPIN		1q21.3	AMP	7	60	0.117	No
FNDC11	0.000164	20q13.33	AMP	7	60	0.117	No
WBP2		17q25.1	AMP	7	60	0.117	No
CDK2AP2		11q13.2	AMP	7	60	0.117	No
ARFRP1	0.000164	20q13.33	AMP	7	60	0.117	Yes
EXOC3	0.0001119	5p15.33	AMP	7	60	0.117	No
ZNF706		8q22.3	AMP	7	60	0.117	No
TCF23		2p23.3	AMP	7	60	0.117	No
NHERF1		17q25.1	AMP	7	60	0.117	Yes
PFN4		2p23.3	AMP	7	60	0.117	No
SLC45A3		1q32.1	AMP	7	60	0.117	Yes
TTC32		2p24.1	AMP	7	60	0.117	No
LPIN1		2p25.1	AMP	7	60	0.117	No
SNORA72		8q22.2	AMP	7	60	0.117	No
OTOF		2p23.3	AMP	7	60	0.117	No
DPYSL5		2p23.3	AMP	7	60	0.117	No
ATP6V1H		8q11.23	AMP	7	60	0.117	No
C6		5p13.1	AMP	7	60	0.117	No
FAAP24		19q13.11	AMP	7	60	0.117	No
SLC6A18	0.0001119	5p15.33	AMP	7	60	0.117	No
DAB2		5p13.1	AMP	7	60	0.117	No
HADHB		2p23.3	AMP	7	60	0.117	No
PRKAA1		5p13.1	AMP	7	60	0.117	No
TARBP1	2.514e-07	1q42.2	AMP	7	60	0.117	No
C7		5p13.1	AMP	7	60	0.117	No
SMC6		2p24.2	AMP	7	60	0.117	No
POTEA		8p11.1	AMP	7	60	0.117	No
C9		5p13.1	AMP	7	60	0.117	No
ADAM5		8p11.22	AMP	7	60	0.117	No
HADHA		2p23.3	AMP	7	60	0.117	No
SEPTIN1		16p11.2	AMP	7	60	0.117	No
SHARPIN		8q24.3	AMP	7	60	0.117	No
PRPF3		1q21.2	AMP	7	60	0.117	No
PDCD5		19q13.11	AMP	7	60	0.117	No
INTS3		1q21.3	AMP	7	60	0.117	No
ZIC4		3q24	AMP	7	60	0.117	No
POMC		2p23.3	AMP	7	60	0.117	No
SLC2A4RG	0.000164	20q13.33	AMP	7	60	0.117	No
MAPRE3		2p23.3	AMP	7	60	0.117	No
CPLANE1		5p13.2	AMP	7	60	0.117	No
ITGB1BP1		2p25.1	AMP	7	60	0.117	No
YWHAQ		2p25.1	AMP	7	60	0.117	No
SEPHS2		16p11.2	AMP	7	60	0.117	No
ERICH5		8q22.2	AMP	7	60	0.117	No
SOX18	0.000164	20q13.33	AMP	7	60	0.117	No
SLC26A9		1q32.1	AMP	7	60	0.117	No
EXOC3-AS1	0.0001119	5p15.33	AMP	7	60	0.117	No
TPPP	0.0001119	5p15.33	AMP	7	60	0.117	No
E2F6		2p25.1	AMP	7	60	0.117	No
MAF1		8q24.3	AMP	7	60	0.117	No
PLSCR4		3q24	AMP	7	60	0.117	No
GGA3		17q25.1	AMP	7	60	0.117	No
MSGN1		2p24.2	AMP	7	60	0.117	No
MRPS21		1q21.2	AMP	7	60	0.117	No
MBOAT2		2p25.1	AMP	7	60	0.117	No
HELZ2	0.000164	20q13.33	AMP	7	60	0.117	No
MFSD4A		1q32.1	AMP	7	60	0.117	No
PRDM9		5p14.2	AMP	7	60	0.117	No
SLC6A3	0.0001119	5p15.33	AMP	7	60	0.117	No
EXOC7		17q25.1	AMP	7	60	0.117	No
UNK		17q25.1	AMP	7	60	0.117	No
DPY19L3		19q13.11	AMP	7	60	0.117	No
TRAPPC3		1p34.3	AMP	7	60	0.117	No
KLHDC10		7q32.2	AMP	7	60	0.117	No
ATAD2B		2p24.1-p23.3	AMP	7	60	0.117	No
NPBWR2	0.000164	20q13.33	AMP	7	60	0.117	No
IAH1		2p25.1	AMP	7	60	0.117	No
GALR2		17q25.1	AMP	7	60	0.117	No
SLC27A3		1q21.3	AMP	7	60	0.117	No
MATN2		8q22.1-q22.2	AMP	7	60	0.117	No
AIP		11q13.2	AMP	7	60	0.117	Yes
PRSS53		16p11.2	AMP	7	60	0.117	No
HM13		20q11.21	AMP	7	60	0.117	No
WDCP		2p23.3	AMP	7	60	0.117	Yes
GPR20		8q24.3	AMP	7	60	0.117	No
SELENOI		2p23.3	AMP	7	60	0.117	No
OSMR		5p13.1	AMP	7	60	0.117	No
LINGO4		1q21.3	AMP	7	60	0.117	No
PLSCR1		3q24	AMP	7	60	0.117	No
ZNF503-AS2		10q22.2	AMP	7	60	0.117	No
SLC9A3	0.0001119	5p15.33	AMP	7	60	0.117	No
DSTYK		1q32.1	AMP	7	60	0.117	No
PLOD2		3q24	AMP	7	60	0.117	No
DNMT3A		2p23.3	AMP	7	60	0.117	Yes
STMN3	0.000164	20q13.33	AMP	7	60	0.117	No
PLSCR2		3q24	AMP	7	60	0.117	No
PTP4A3		8q24.3	AMP	7	60	0.117	No
ZNF85		19p12	AMP	7	60	0.117	No
CAD		2p23.3	AMP	7	60	0.117	Yes
RNF170		8p11.21	AMP	7	60	0.117	No
HMCES		3q21.3	AMP	7	60	0.117	No
DNAJC5	0.000164	20q13.33	AMP	7	60	0.117	No
GYG1		3q24	AMP	7	60	0.117	No
NUAK2		1q32.1	AMP	7	60	0.117	No
PLXND1		3q22.1	AMP	7	60	0.117	No
RGS9BP		19q13.11	AMP	7	60	0.117	No
ZBTB46	0.000164	20q13.33	AMP	7	60	0.117	No
CYC1		8q24.3	AMP	7	60	0.117	No
GDF7		2p24.1	AMP	7	60	0.117	No
ZNF90		19p12	AMP	7	60	0.117	No
TMCC2		1q32.1	AMP	7	60	0.117	No
GMEB2	0.000164	20q13.33	AMP	7	60	0.117	No
H1-10		3q21.3	AMP	7	60	0.117	No
ASXL2		2p23.3	AMP	7	60	0.117	Yes
CIMIP2C		2p23.3	AMP	7	60	0.117	No
PCMTD2	0.000164	20q13.33	AMP	7	60	0.117	No
SLC66A3		2p25.1	AMP	7	60	0.117	No
PRR30		2p23.3	AMP	7	60	0.117	No
CIMIP5		2p25.1	AMP	7	60	0.117	No
SLCO4A1-AS1		20q13.33	AMP	7	60	0.117	No
EGFLAM		5p13.2-p13.1	AMP	7	60	0.117	No
LINC00051		8q24.3	AMP	7	60	0.117	No
ZDHHC11	0.0001119	5p15.33	AMP	7	60	0.117	No
ASAP2		2p25.1	AMP	7	60	0.117	No
CDK18		1q32.1	AMP	7	60	0.117	No
SNORD72		5p13.1	AMP	7	60	0.117	No
NT5C1B		2p24.2	AMP	7	60	0.117	No
PCARE		2p23.2	AMP	7	60	0.117	No
PTRHD1		2p23.3	AMP	7	60	0.117	No
ZC3HC1		7q32.2	AMP	7	60	0.117	No
ASIP		20q11.22	AMP	7	60	0.117	No
YWHAZ		8q22.3	AMP	7	60	0.117	No
MROH2B		5p13.1	AMP	7	60	0.117	No
CGREF1		2p23.3	AMP	7	60	0.117	No
WDR70		5p13.2	AMP	7	60	0.117	No
SHC1		1q21.3	AMP	7	60	0.117	No
CPQ		8q22.1	AMP	7	60	0.117	No
CARD6		5p13.1	AMP	7	60	0.117	No
PLSCR5		3q24	AMP	7	60	0.117	No
ZIC1		3q24	AMP	7	60	0.117	No
GCGR		17q25.3	AMP	7	60	0.117	No
UNC13D		17q25.3	AMP	7	60	0.117	No
MFSD2B		2p23.3	AMP	7	60	0.117	No
TRIM65		17q25.1	AMP	7	60	0.117	No
KLHDC8A		1q32.1	AMP	7	60	0.117	No
ADGRF3		2p23.3	AMP	7	60	0.117	No
LIFR		5p13.1	AMP	7	60	0.117	Yes
OST4		2p23.3	AMP	7	60	0.117	No
TRIB2		2p24.3	AMP	7	60	0.117	No
CLIP4		2p23.2	AMP	7	60	0.117	No
REM1		20q11.21	AMP	7	60	0.117	No
LINC00028		20q11.21	AMP	7	60	0.117	No
SLC5A6		2p23.3	AMP	7	60	0.117	No
ADAM3A		8p11.22	AMP	7	60	0.117	No
ABHD1		2p23.3	AMP	7	60	0.117	No
ZNF93		19p12	AMP	7	60	0.117	No
SCARNA20		17q23.2	AMP	7	60	0.117	No
ZNF558		19p13.2	AMP	7	60	0.117	No
CD300LF		17q25.1	AMP	7	60	0.117	No
NUDT19		19q13.11	AMP	7	60	0.117	No
PLCXD3		5p13.1	AMP	7	60	0.117	No
APOB		2p24.1	AMP	7	60	0.117	No
ZNF668		16p11.2	AMP	7	60	0.117	No
SF3B6		2p23.3	AMP	7	60	0.117	No
ADAM32		8p11.22	AMP	7	60	0.117	No
GDNF		5p13.2	AMP	7	60	0.117	No
FYB1		5p13.1	AMP	7	60	0.117	No
C1ORF54		1q21.2	AMP	7	60	0.117	No
ILF2		1q21.3	AMP	7	60	0.117	No
SLC12A7	0.0001119	5p15.33	AMP	7	60	0.117	No
C2CD4D-AS1		1q21.3	AMP	7	60	0.117	No
RTEL1	0.000164	20q13.33	AMP	7	60	0.117	Yes
VSNL1		2p24.2	AMP	7	60	0.117	No
RAB10		2p23.3	AMP	7	60	0.117	No
DRC1		2p23.3	AMP	7	60	0.117	No
NCOA1		2p23.3	AMP	7	60	0.117	Yes
ZNF48		16p11.2	AMP	7	60	0.117	No
RRM2		2p25.1	AMP	7	60	0.117	No
TNFRSF6B	0.000164	20q13.33	AMP	7	60	0.117	No
EFR3B		2p23.3	AMP	7	60	0.117	No
ZNF507		19q13.11	AMP	7	60	0.117	No
UBE2H		7q32.2	AMP	7	60	0.117	No
NKD2	0.0001119	5p15.33	AMP	7	60	0.117	No
CPB1		3q24	AMP	7	60	0.117	No
ZNF646		16p11.2	AMP	7	60	0.117	No
PRPF6	0.000164	20q13.33	AMP	7	60	0.117	No
ODC1		2p25.1	AMP	7	60	0.117	No
SDHA	0.0001119	5p15.33	AMP	7	60	0.117	Yes
CPA3		3q24	AMP	7	60	0.117	No
IDO1		8p11.21	AMP	7	60	0.117	No
NOL11		17q24.2	AMP	6	60	0.1	No
RSL1D1		16p13.13	AMP	6	60	0.1	No
ZNF431		19p12	AMP	6	60	0.1	No
TDRD10		1q21.3	AMP	6	60	0.1	No
ATP5PD		17q25.1	AMP	6	60	0.1	No
LINC01020		5p15.32	AMP	6	60	0.1	No
SHE		1q21.3	AMP	6	60	0.1	No
LCE3A		1q21.3	AMP	6	60	0.1	No
LCE2D		1q21.3	AMP	6	60	0.1	No
LCE3C		1q21.3	AMP	6	60	0.1	No
MED24		17q21.1	AMP	6	60	0.1	No
FOXJ1		17q25.1	AMP	6	60	0.1	No
LCE3B		1q21.3	AMP	6	60	0.1	No
TRHR		8q23.1	AMP	6	60	0.1	No
LCE3E		1q21.3	AMP	6	60	0.1	No
TRIO		5p15.2	AMP	6	60	0.1	No
LCE2C		1q21.3	AMP	6	60	0.1	No
CHD4		12p13.31	AMP	6	60	0.1	Yes
WIPI1		17q24.2	AMP	6	60	0.1	No
LINC01126		2p21	AMP	6	60	0.1	No
PHF20L1		8q24.22	AMP	6	60	0.1	No
S100A9		1q21.3	AMP	6	60	0.1	No
KCNQ2		20q13.33	AMP	6	60	0.1	No
LCE1F		1q21.3	AMP	6	60	0.1	No
RNF7		3q23	AMP	6	60	0.1	No
LCE2A		1q21.3	AMP	6	60	0.1	No
KCNN3		1q21.3	AMP	6	60	0.1	No
TRAF4	8.434e-06	17q11.2	AMP	6	60	0.1	No
MTCL2		20q11.23	AMP	6	60	0.1	No
TLDC2		20q11.23	AMP	6	60	0.1	No
MTDH		8q22.1	AMP	6	60	0.1	No
S100A7		1q21.3	AMP	6	60	0.1	No
WNT7A		3p25.1	AMP	6	60	0.1	No
S100A8		1q21.3	AMP	6	60	0.1	No
LCE1B		1q21.3	AMP	6	60	0.1	No
LCE1A		1q21.3	AMP	6	60	0.1	No
LCE1D		1q21.3	AMP	6	60	0.1	No
FLG		1q21.3	AMP	6	60	0.1	No
LCE1C		1q21.3	AMP	6	60	0.1	No
LCE1E		1q21.3	AMP	6	60	0.1	No
S100A1		1q21.3	AMP	6	60	0.1	No
RHO		3q22.1	AMP	6	60	0.1	No
PRM3		16p13.13	AMP	6	60	0.1	No
TRIM72		16p11.2	AMP	6	60	0.1	No
CDR2L		17q25.1	AMP	6	60	0.1	No
DNAAF11		8q24.22	AMP	6	60	0.1	No
IRX1		5p15.33	AMP	6	60	0.1	No
MAPK15		8q24.3	AMP	6	60	0.1	No
NDUFV1		11q13.2	AMP	6	60	0.1	No
CCN3		8q24.12	AMP	6	60	0.1	No
NDUFAF6		8q22.1	AMP	6	60	0.1	No
ZNF714		19p12	AMP	6	60	0.1	No
KCNS2		8q22.2	AMP	6	60	0.1	No
OPRK1		8q11.23	AMP	6	60	0.1	No
AQP10		1q21.3	AMP	6	60	0.1	No
KCNQ3		8q24.22	AMP	6	60	0.1	No
S100A12		1q21.3	AMP	6	60	0.1	No
KCTD2		17q25.1	AMP	6	60	0.1	No
S100A13		1q21.3	AMP	6	60	0.1	No
GATAD2B		1q21.3	AMP	6	60	0.1	No
PBXIP1		1q21.3	AMP	6	60	0.1	No
SCRIB		8q24.3	AMP	6	60	0.1	No
RASA2		3q23	AMP	6	60	0.1	No
TRPC1		3q23	AMP	6	60	0.1	No
ADK		10q22.2	AMP	6	60	0.1	No
NDUFS6		5p15.33	AMP	6	60	0.1	No
OC90		8q24.22	AMP	6	60	0.1	No
BASP1-AS1		5p15.1	AMP	6	60	0.1	No
S100A7L2		1q21.3	AMP	6	60	0.1	No
LINC02112		5p15.31-p15.2	AMP	6	60	0.1	No
LCE4A		1q21.3	AMP	6	60	0.1	No
RPL38		17q25.1	AMP	6	60	0.1	No
FNTA		8p11.21	AMP	6	60	0.1	No
SNN		16p13.13	AMP	6	60	0.1	No
RRP1		21q22.3	AMP	6	60	0.1	No
CHRNA4		20q13.33	AMP	6	60	0.1	No
NDRG3		20q11.23	AMP	6	60	0.1	No
NAT9		17q25.2	AMP	6	60	0.1	No
BRF2		8p11.23	AMP	6	60	0.1	No
DEFB123		20q11.21	AMP	6	60	0.1	No
ITGAX		16p11.2	AMP	6	60	0.1	No
ITGAM		16p11.2	AMP	6	60	0.1	No
TRMT61A	0.07694	14q32.33	AMP	6	60	0.1	No
COLEC11		2p25.3	AMP	6	60	0.1	No
CKB	0.07694	14q32.33	AMP	6	60	0.1	No
ITGAD		16p11.2	AMP	6	60	0.1	No
ACY3		11q13.2	AMP	6	60	0.1	No
ARL8A		1q32.1	AMP	6	60	0.1	No
DPYSL2		8p21.2	HOMDEL	6	60	0.1	No
CDK3		17q25.1	AMP	6	60	0.1	No
CDH18		5p14.3	AMP	6	60	0.1	No
CNPY4	0.1819	7q22.1	AMP	6	60	0.1	No
ANGPT1		8q23.1	AMP	6	60	0.1	No
COL14A1		8q24.12	AMP	6	60	0.1	No
PRR23C		3q23	AMP	6	60	0.1	No
NT5C		17q25	AMP	6	60	0.1	No
GRK2		11q13.2	AMP	6	60	0.1	No
AMZ2		17q24.2	AMP	6	60	0.1	No
BAG5	0.07694	14q32.33	AMP	6	60	0.1	No
LRFN4		11q13.2	AMP	6	60	0.1	No
CD2BP2		16p11.2	AMP	6	60	0.1	No
AHSP		16p11.2	AMP	6	60	0.1	No
CA14		1q21.2	AMP	6	60	0.1	No
RNF144A		2p25.1	AMP	6	60	0.1	No
PWP2		21q22.3	AMP	6	60	0.1	No
NIPAL2		8q22.2	AMP	6	60	0.1	No
IL6R		1q21.3	AMP	6	60	0.1	No
GATD3		21q22.3	AMP	6	60	0.1	No
CD300LB		17q25.1	AMP	6	60	0.1	No
YIF1B		19q13.2	AMP	6	60	0.1	No
NCOA3		20q13.12	AMP	6	60	0.1	Yes
MYL6		12q13.2	AMP	6	60	0.1	No
SNORD123		5p15.2	AMP	6	60	0.1	No
RUSF1		16p11.2	AMP	6	60	0.1	No
DEFB118		20q11.21	AMP	6	60	0.1	No
SLC2A10		20q13.12	AMP	6	60	0.1	No
TNFRSF1A		12p13.31	AMP	6	60	0.1	No
PKD1L1-AS1		7p12.3	AMP	6	60	0.1	No
BAG4		8p11.23	AMP	6	60	0.1	No
CEBPG		19q13.11	AMP	6	60	0.1	No
PLPP5		8p11.23	AMP	6	60	0.1	No
CEBPA		19q13.11	AMP	6	60	0.1	Yes
LCE2B		1q21.3	AMP	6	60	0.1	No
MYO10		5p15.1	AMP	6	60	0.1	No
LCE3D		1q21.3	AMP	6	60	0.1	No
SNORD124		17q21.1	AMP	6	60	0.1	No
C1D		2p14	AMP	6	60	0.1	No
ATP6V1C2		2p25.1	AMP	6	60	0.1	No
PSMD12		17q24.2	AMP	6	60	0.1	No
S100A14		1q21.3	AMP	6	60	0.1	No
TNP2		16p13.13	AMP	6	60	0.1	No
TRAPPC14	0.1819	7q22.1	AMP	6	60	0.1	No
RCOR2		11q13.1	AMP	6	60	0.1	No
NSD3		8p11.23	AMP	6	60	0.1	Yes
PGLYRP3		1q21.3	AMP	6	60	0.1	No
ARFGAP1		20q13.33	AMP	6	60	0.1	No
NAXD	0.08857	13q34	AMP	6	60	0.1	No
TPD52		8q21.13	AMP	6	60	0.1	No
RMI2		16p13.13	AMP	6	60	0.1	Yes
VMP1		17q23.1	AMP	6	60	0.1	No
U2SURP		3q23	AMP	6	60	0.1	No
LAMTOR4	0.1819	7q22.1	AMP	6	60	0.1	No
KCNK6		19q13.2	AMP	6	60	0.1	No
TFDP2		3q23	AMP	6	60	0.1	No
SLC38A1		12q13.11	AMP	6	60	0.1	No
SNX31		8q22.3	AMP	6	60	0.1	No
BCKDK		16p11.2	AMP	6	60	0.1	No
HPYR1		8q24.22	AMP	6	60	0.1	No
GPC2	0.1819	7q22.1	AMP	6	60	0.1	No
TPM3		1q21.3	AMP	6	60	0.1	Yes
TGFB1I1		16p11.2	AMP	6	60	0.1	No
NUDT8		11q13.2	AMP	6	60	0.1	No
EEF1A2		20q13.33	AMP	6	60	0.1	No
MARK2		11q13.1	AMP	6	60	0.1	No
RAB11FIP1		8p11.23	AMP	6	60	0.1	No
ZNF707		8q24.3	AMP	6	60	0.1	No
LINC02878		8q24.3	AMP	6	60	0.1	No
CHST2		3q24	AMP	6	60	0.1	No
FAM83H		8q24.3	AMP	6	60	0.1	No
PPP1R13B		14q32.33	AMP	6	60	0.1	No
PYDC1		16p11.2	AMP	6	60	0.1	No
TXNDC11		16p13.13	AMP	6	60	0.1	No
TAS2R1		5p15.31	AMP	6	60	0.1	No
CHRNA2		8p21.2	HOMDEL	6	60	0.1	No
TG		8q24.22	AMP	6	60	0.1	No
PRM2		16p13.13	AMP	6	60	0.1	No
COPS7A		12p13.31	AMP	6	60	0.1	No
PLEKHO1		1q21.2	AMP	6	60	0.1	No
LSM14B		20q13.33	AMP	6	60	0.1	No
SNORA38B		17q24.2	AMP	6	60	0.1	No
PAQR9		3q23	AMP	6	60	0.1	No
RHEX		1q32.1	AMP	6	60	0.1	No
KLHDC9		1q23.3	AMP	6	60	0.1	No
NR1D1		17q21.1	AMP	6	60	0.1	No
TTC24		1q22	AMP	6	60	0.1	No
PRM1		16p13.13	AMP	6	60	0.1	No
SNORD42A	8.434e-06	17q11.2	AMP	6	60	0.1	No
SPRR2A		1q21.3	AMP	6	60	0.1	No
PRPSAP1		17q25.1	AMP	6	60	0.1	No
RAB5IF		20q11.23	AMP	6	60	0.1	No
SPRR2B		1q21.3	AMP	6	60	0.1	No
IRX4		5p15.33	AMP	6	60	0.1	No
DEFB119		20q11.21	AMP	6	60	0.1	No
DEFB122		20q11.21	AMP	6	60	0.1	No
ATPSCKMT		5p15.2	AMP	6	60	0.1	No
DEFB121		20q11.21	AMP	6	60	0.1	No
CALM2		2p21	AMP	6	60	0.1	No
FAM20A		17q24.2	AMP	6	60	0.1	No
ALLC		2p25.3	AMP	6	60	0.1	No
LINC00938		12q12	AMP	6	60	0.1	No
ADAMTS16		5p15.32	AMP	6	60	0.1	No
JPT1		17q25.1	AMP	6	60	0.1	No
MARCHF11		5p15.1	AMP	6	60	0.1	No
PXYLP1		3q23	AMP	6	60	0.1	No
TLCD1	8.434e-06	17q11.2	AMP	6	60	0.1	No
BPIFA1		20q11.21	AMP	6	60	0.1	No
SPRR2C		1q21.3	AMP	6	60	0.1	No
SPRR2D		1q21.3	AMP	6	60	0.1	No
IQGAP3		1q22	AMP	6	60	0.1	No
SPRR2E		1q21.3	AMP	6	60	0.1	No
SPRR2F		1q21.3	AMP	6	60	0.1	No
SPRR2G		1q21.3	AMP	6	60	0.1	No
KCNV1		8q23.2	AMP	6	60	0.1	No
PPP1R15B		1q32.1	AMP	6	60	0.1	No
PLXDC1		17q12	AMP	6	60	0.1	No
SPRR3		1q21.3	AMP	6	60	0.1	No
BPTF		17q24.2	AMP	6	60	0.1	No
ANKH		5p15.2	AMP	6	60	0.1	No
CD300A		17q25.1	AMP	6	60	0.1	No
RNF157		17q25.1	AMP	6	60	0.1	No
RIDA		8q22.2	AMP	6	60	0.1	No
VPS45		1q21.2	AMP	6	60	0.1	No
COMMD7		20q11.21	AMP	6	60	0.1	No
PRSS8		16p11.2	AMP	6	60	0.1	Yes
IRX2		5p15.33	AMP	6	60	0.1	No
IRX2-DT		5p15.33	AMP	6	60	0.1	No
GRK7		3q23	AMP	6	60	0.1	No
SCARA3		8p21.1	HOMDEL	6	60	0.1	No
NAXE		1q22	AMP	6	60	0.1	No
COX20	2.514e-07	1q44	AMP	6	60	0.1	No
PGLYRP4		1q21.3	AMP	6	60	0.1	No
GPATCH4		1q22-q23.1	AMP	6	60	0.1	No
SMARCC2		12q13.2	AMP	6	60	0.1	No
FBLN2		3p25.1	AMP	6	60	0.1	No
MRPL58		17q25.1	AMP	6	60	0.1	No
GUSBP1		5p14.3	AMP	6	60	0.1	No
DNAI2		17q25.1	AMP	6	60	0.1	No
PDIA6		2p25.1	AMP	6	60	0.1	No
NDRG1		8q24.22	AMP	6	60	0.1	Yes
ZBTB38		3q23	AMP	6	60	0.1	No
LSM1		8p11.23	AMP	6	60	0.1	No
SF3B4		1q21.2	AMP	6	60	0.1	No
TAF6	0.1819	7q22.1	AMP	6	60	0.1	No
SUMO2		17q25	AMP	6	60	0.1	No
RNASEH1		2p25.3	AMP	6	60	0.1	No
TMEM71		8q24.22	AMP	6	60	0.1	No
SLC38A4		12q13.11	AMP	6	60	0.1	No
NUDCD1		8q23.1	AMP	6	60	0.1	No
NUP210L		1q21.3	AMP	6	60	0.1	No
TAF4		20q13.33	AMP	6	60	0.1	No
AANAT		17q25.1	AMP	6	60	0.1	No
MEF2D		1q22	AMP	6	60	0.1	Yes
ICOSLG		21q22.3	AMP	6	60	0.1	Yes
SDHAP3		5p15.33	AMP	6	60	0.1	No
SLC16A5		17q25.1	AMP	6	60	0.1	No
CATSPERG		19q13.2	AMP	6	60	0.1	No
SLC16A6		17q24.2	AMP	6	60	0.1	No
RHPN2		19q13.11	AMP	6	60	0.1	No
SNORD4B	8.434e-06	17q11	AMP	6	60	0.1	No
OTOP3		17q25.1	AMP	6	60	0.1	No
C19ORF33		19q13.2	AMP	6	60	0.1	No
AATBC		21q22.3	AMP	6	60	0.1	No
SNORD4A	8.434e-06	17q11	AMP	6	60	0.1	No
PSMA7		20q13.33	AMP	6	60	0.1	No
ARMC5		16p11.2	AMP	6	60	0.1	No
SLC9A9		3q24	AMP	6	60	0.1	No
AGPAT3		21q22.3	AMP	6	60	0.1	No
OTULINL		5p15.2	AMP	6	60	0.1	No
BTG2		1q32.1	AMP	6	60	0.1	Yes
HAS2		8q24.13	AMP	6	60	0.1	No
SNRPE		1q32.1	AMP	6	60	0.1	No
SLA		8q24.22	AMP	6	60	0.1	No
TMEM170B		6p24.2	AMP	6	60	0.1	No
DPF1		19q13.2	AMP	6	60	0.1	No
STPG4		2p21	AMP	6	60	0.1	No
PUF60		8q24.3	AMP	6	60	0.1	No
TRIM35		8p21.2	HOMDEL	6	60	0.1	No
PNMA2		8p21.2	HOMDEL	6	60	0.1	No
POP1		8q22.2	AMP	6	60	0.1	No
PTK2B		8p21.2	HOMDEL	6	60	0.1	No
BCAN		1q23.1	AMP	6	60	0.1	No
MLF2		12p13.31	AMP	6	60	0.1	No
STAR		8p11.23	AMP	6	60	0.1	No
PRKAR1A		17q24.2	AMP	6	60	0.1	Yes
SNTA1		20q11.21	AMP	6	60	0.1	No
SNTB1		8q24.12	AMP	6	60	0.1	No
RBM34	2.514e-07	1q42.3	AMP	6	60	0.1	No
CLU		8p21.1	HOMDEL	6	60	0.1	No
FBF1		17q25.1	AMP	6	60	0.1	No
HAPLN2		1q23.1	AMP	6	60	0.1	No
CD300LD		17q25.1	AMP	6	60	0.1	No
KIF19		17q25.1	AMP	6	60	0.1	No
OTULIN		5p15.2	AMP	6	60	0.1	No
ESCO2		8p21.1	HOMDEL	6	60	0.1	Yes
SLC5A2		16p11.2	AMP	6	60	0.1	No
EPHX2		8p21.2-p21.1	HOMDEL	6	60	0.1	No
SNORA14B	2.514e-07	1q42.3	AMP	6	60	0.1	No
PLAU		10q22.2	AMP	6	60	0.1	No
GAL3ST4	0.1819	7q22.1	AMP	6	60	0.1	No
ACOX1		17q25.1	AMP	6	60	0.1	No
PDCD6P1		5p15.33	AMP	6	60	0.1	No
EFR3A		8q24.22	AMP	6	60	0.1	No
STK3		8q22.2	AMP	6	60	0.1	No
GPR37L1		1q32.1	AMP	6	60	0.1	No
COA6	2.514e-07	1q42.2	AMP	6	60	0.1	No
DZIP1L		3q22.3	AMP	6	60	0.1	No
BNIP3L		8p21.2	HOMDEL	6	60	0.1	No
ANP32E		1q21.2	AMP	6	60	0.1	No
RETREG1		5p15.1	AMP	6	60	0.1	No
XRN1		3q23	AMP	6	60	0.1	No
MYL6B		12q13.2	AMP	6	60	0.1	No
GSTP1		11q13.2	AMP	6	60	0.1	No
HOOK3		8p11.21	AMP	6	60	0.1	Yes
SCAF11		12q12	AMP	6	60	0.1	No
SEMA5A		5p15.31	AMP	6	60	0.1	No
NEK8	8.434e-06	17q11.2	AMP	6	60	0.1	No
HID1		17q25.1	AMP	6	60	0.1	No
LRATD1		2p24.3	AMP	6	60	0.1	No
HRNR		1q21.3	AMP	6	60	0.1	No
FLG2		1q21.3	AMP	6	60	0.1	No
ARSG		17q24.2	AMP	6	60	0.1	No
PFDN2		1q23.3	AMP	6	60	0.1	No
RAB20	0.08857	13q34	AMP	6	60	0.1	No
CMPK2		2p25.2	AMP	6	60	0.1	No
MBD4		3q21.3	AMP	6	60	0.1	Yes
PBK		8p21.1	HOMDEL	6	60	0.1	No
UNC93B1		11q13.2	AMP	6	60	0.1	No
EBF2		8p21.2	HOMDEL	6	60	0.1	No
CIITA		16p13.13	AMP	6	60	0.1	Yes
TSPYL5		8q22.1	AMP	6	60	0.1	No
HAS2-AS1		8q24.13	AMP	6	60	0.1	No
C10ORF55		10q22.2	AMP	6	60	0.1	No
BIRC7		20q13.33	AMP	6	60	0.1	No
KPLCE		1q21.3	AMP	6	60	0.1	No
HNRNPU	2.514e-07	1q44	AMP	6	60	0.1	No
MTMR11		1q21.2	AMP	6	60	0.1	No
AP4M1	0.1819	7q22.1	AMP	6	60	0.1	No
LORICRIN		1q21.3	AMP	6	60	0.1	No
PYCARD		16p11.2	AMP	6	60	0.1	No
NKAIN4		20q13.33	AMP	6	60	0.1	No
PM20D1		1q32.1	AMP	6	60	0.1	No
IFT122		3q21.3-q22.1	AMP	6	60	0.1	No
ATP8B2		1q21.3	AMP	6	60	0.1	No
PRSS36		16p11.2	AMP	6	60	0.1	No
TEN1		17q25.1	AMP	6	60	0.1	No
S100A16		1q21.3	AMP	6	60	0.1	No
RNF41		12q13.3	AMP	6	60	0.1	No
CARS2	0.08857	13q34	AMP	6	60	0.1	No
WDR88		19q13.11	AMP	6	60	0.1	No
LELP1		1q21.3	AMP	6	60	0.1	No
TRIM47		17q25.1	AMP	6	60	0.1	No
OTUD7B		1q21.2	AMP	6	60	0.1	No
PLS1		3q23	AMP	6	60	0.1	No
GPRC5C		17q25.1	AMP	6	60	0.1	No
NFASC		1q32.1	AMP	6	60	0.1	No
CRNN		1q21.3	AMP	6	60	0.1	No
BTBD17		17q25.1	AMP	6	60	0.1	No
KAT8		16p11.2	AMP	6	60	0.1	No
ANKRD46		8q22.3	AMP	6	60	0.1	No
LRP3		19q13.11	AMP	6	60	0.1	No
CRCT1		1q21.3	AMP	6	60	0.1	No
SPRR1A		1q21.3	AMP	6	60	0.1	No
SPRR1B		1q21.3	AMP	6	60	0.1	No
ENY2		8q23.1	AMP	6	60	0.1	No
PMCHL1		5p14.3	AMP	6	60	0.1	No
PIANP		12p13.31	AMP	6	60	0.1	No
DIPK2A		3q24	AMP	6	60	0.1	No
TGIF2		20q11.23	AMP	6	60	0.1	No
MTBP		8q24.12	AMP	6	60	0.1	No
PABPC1		8q22.3	AMP	6	60	0.1	No
EFCAB2	2.514e-07	1q44	AMP	6	60	0.1	No
DDHD2		8p11.23	AMP	6	60	0.1	No
CD300E		17q25.1	AMP	6	60	0.1	No
OMG	2.495e-09	17q11.2	HOMDEL	6	60	0.1	No
HHLA1		8q24.22	AMP	6	60	0.1	No
CCN4		8q24.22	AMP	6	60	0.1	No
TP53INP1		8q22.1	AMP	6	60	0.1	No
ZFP36L2		2p21	AMP	6	60	0.1	Yes
ATR		3q23	AMP	6	60	0.1	Yes
SPINT2		19q13.2	AMP	6	60	0.1	No
MRPL13		8q24.12	AMP	6	60	0.1	No
CFAP141		1q21.3	AMP	6	60	0.1	No
MCM7	0.1819	7q22.1	AMP	6	60	0.1	No
H1-8		3q22.1	AMP	6	60	0.1	No
RPL32P3		3q21.3	AMP	6	60	0.1	No
ZNF843		16p11.2	AMP	6	60	0.1	No
GRHL2		8q22.3	AMP	6	60	0.1	No
DNMT3L		21q22.3	AMP	6	60	0.1	No
ARID2		12q12	AMP	6	60	0.1	Yes
ANKRD13D		11q13.2	AMP	6	60	0.1	No
NES		1q23.1	AMP	6	60	0.1	No
DSN1		20q11.23	AMP	6	60	0.1	No
COL20A1		20q13.33	AMP	6	60	0.1	No
SCARNA11		12p13.31	AMP	6	60	0.1	No
LTBR		12p13.31	AMP	6	60	0.1	No
SMCP		1q21.3	AMP	6	60	0.1	No
TOMM20	2.514e-07	1q42.3	AMP	6	60	0.1	No
BPIFA3		20q11.21	AMP	6	60	0.1	No
MRPL43		10q24.31	AMP	6	60	0.1	No
RPS7		2p25.3	AMP	6	60	0.1	No
PCOLCE2		3q23	AMP	6	60	0.1	No
MRPL38		17q25.1	AMP	6	60	0.1	No
SCNN1A		12p13.31	AMP	6	60	0.1	No
MRPL36		5p15.33	AMP	6	60	0.1	No
LCE5A		1q21.3	AMP	6	60	0.1	No
SLC7A10		19q13.11	AMP	6	60	0.1	No
KPNA2		17q24.2	AMP	6	60	0.1	No
BASP1		5p15.1	AMP	6	60	0.1	No
CLUHP3		16p11.2	AMP	6	60	0.1	No
PMVK		1q21.3	AMP	6	60	0.1	No
EPCAM		2p21	AMP	6	60	0.1	Yes
UBE2O		17q25.1	AMP	6	60	0.1	No
LINC00298		2p25.1	AMP	6	60	0.1	No
S100A7A		1q21.3	AMP	6	60	0.1	No
CSF3		17q21.1	AMP	6	60	0.1	No
GK5		3q23	AMP	6	60	0.1	No
CDK5RAP1		20q11.21	AMP	6	60	0.1	No
IVL		1q21.3	AMP	6	60	0.1	No
PPP1R27		17q25.3	AMP	6	60	0.1	No
BPIFA4P		20q11.21	AMP	6	60	0.1	No
GOT1L1		8p11.23	AMP	6	60	0.1	No
GPR142		17q25.1	AMP	6	60	0.1	No
CD300C		17q25.1	AMP	6	60	0.1	No
LCE6A		1q21.3	AMP	6	60	0.1	No
PIK3C2B		1q32.1	AMP	6	60	0.1	Yes
ZNF3	0.1819	7q22.1	AMP	6	60	0.1	No
FUS		16p11.2	AMP	6	60	0.1	Yes
BCAR4		16p13.13	AMP	6	60	0.1	No
SPRR4		1q21.3	AMP	6	60	0.1	No
MRPS28		8q21.13	AMP	6	60	0.1	No
LPCAT1		5p15.33	AMP	6	60	0.1	No
KPRP		1q21.3	AMP	6	60	0.1	No
NTSR1		20q13.33	AMP	6	60	0.1	No
YPEL5		2p23.1	AMP	6	60	0.1	Yes
ZNF622		5p15.1	AMP	6	60	0.1	No
OR2Z1		19p13.2	AMP	6	60	0.1	No
CD300LD-AS1		17q25.1	AMP	6	60	0.1	No
YBX3P1		16p11.2	AMP	6	60	0.1	No
PPP1R14A		19q13.1	AMP	6	60	0.1	No
ZNF623		8q24.3	AMP	6	60	0.1	No
THRAP3		1p34.3	AMP	6	60	0.1	No
TTYH2		17q25.1	AMP	6	60	0.1	No
PLEKHG6		12p13.31	AMP	6	60	0.1	No
COPS6	0.1819	7q22.1	AMP	6	60	0.1	No
PPP2R2A		8p21.2	HOMDEL	6	60	0.1	Yes
ZC3H7A		16p13.13	AMP	6	60	0.1	No
RP1		8q11.23-q12.1	AMP	6	60	0.1	No
STMN4		8p21.2	HOMDEL	6	60	0.1	No
TMEM74		8q23.1	AMP	6	60	0.1	No
COX6A2		16p11.2	AMP	6	60	0.1	No
ADRA1A		8p21.2	HOMDEL	6	60	0.1	No
RSAD2		2p25.2	AMP	6	60	0.1	No
FBXL7		5p15.1	AMP	6	60	0.1	No
TBX10		11q13.2	AMP	6	60	0.1	No
CCDC25		8p21.1	HOMDEL	6	60	0.1	No
TTC39C		18q11.2	AMP	6	60	0.1	No
SEMA4G		10q24.31	AMP	6	60	0.1	No
BPIFB1		20q11.21	AMP	6	60	0.1	No
ARMC7		17q25.1	AMP	6	60	0.1	No
UBE2Q1		1q21.3	AMP	6	60	0.1	No
SNORA7B		3q21.3	AMP	6	60	0.1	No
PENK		8q12.1	AMP	6	60	0.1	No
TWNK		10q24.31	AMP	6	60	0.1	No
CSTB		21q22.3	AMP	6	60	0.1	No
C17ORF58		17q24.2	AMP	6	60	0.1	No
ATP1B3		3q23	AMP	6	60	0.1	No
SUMO1P1		20q13.2	AMP	6	60	0.1	No
ALDH3B2		11q13.2	AMP	6	60	0.1	No
CHRAC1		8q24.3	AMP	6	60	0.1	No
OTOP2		17q25.1	AMP	6	60	0.1	No
GHRH		20q11.23	AMP	6	60	0.1	No
RSPO2		8q23.1	AMP	6	60	0.1	Yes
RHBDF2		17q25.1	AMP	6	60	0.1	No
KCNF1		2p25.1	AMP	6	60	0.1	No
SOCS1		16p13.13	AMP	6	60	0.1	Yes
ARID4B	2.514e-07	1q42.3	AMP	6	60	0.1	Yes
COA8	0.07694	14q32.33	AMP	6	60	0.1	No
MBLAC1	0.1819	7q22.1	AMP	6	60	0.1	No
PEPD		19q13.11	AMP	6	60	0.1	No
SDC2		8q22.1	AMP	6	60	0.1	No
ARHGAP27P2		17q24.2	AMP	6	60	0.1	No
ALDOC	8.434e-06	17q11.2	AMP	5	60	0.083	No
OXR1		8q23.1	AMP	5	60	0.083	No
CNRIP1		2p14	AMP	5	60	0.083	No
OR2T29	2.514e-07	1q44	AMP	5	60	0.083	No
FBXL20		17q12	AMP	5	60	0.083	No
PKD1L1		7p12.3	AMP	5	60	0.083	No
HAPLN3		15q26.1	AMP	5	60	0.083	No
KCTD15		19q13.11	AMP	5	60	0.083	No
ZBTB18	2.514e-07	1q44	AMP	5	60	0.083	No
KCNJ16		17q24.3	AMP	5	60	0.083	No
BCAS1		20q13.2	AMP	5	60	0.083	No
SOX14		3q22.3	AMP	5	60	0.083	No
ADCY2		5p15.31	AMP	5	60	0.083	No
ABCA10		17q24.3	AMP	5	60	0.083	No
SLC39A14		8p21.3	HOMDEL	5	60	0.083	No
ZNF461		19q13.13	AMP	5	60	0.083	No
ZMIZ2		7p13	AMP	5	60	0.083	No
RBM42		19q13.12	AMP	5	60	0.083	No
ADTRP		6p24.1	AMP	5	60	0.083	No
TRAPPC12		2p25.3	AMP	5	60	0.083	No
ALKBH6		19q13.12	AMP	5	60	0.083	No
ZNF585B		19q13.12	AMP	5	60	0.083	No
KMT5B		11q13.2	AMP	5	60	0.083	No
NDUFA7		19p13.2	AMP	5	60	0.083	No
IQSEC3		12p13.33	AMP	5	60	0.083	No
UBE2V1		20q13.13	AMP	5	60	0.083	No
ARHGEF33		2p22.1	AMP	5	60	0.083	No
UBE2V2		8q11.21	AMP	5	60	0.083	No
NELFA		4p16.3	AMP	5	60	0.083	No
CSAD		12q13.13	AMP	5	60	0.083	No
EIF3H		8q23.3-q24.11	AMP	5	60	0.083	No
SDHC		1q23.3	AMP	5	60	0.083	Yes
NLRP3	2.514e-07	1q44	AMP	5	60	0.083	No
NOP2		12p13.31	AMP	5	60	0.083	No
RGS22		8q22.2	AMP	5	60	0.083	No
HAR1B		20q13.33	AMP	5	60	0.083	No
AGO3		1p34.3	AMP	5	60	0.083	No
HAR1A		20q13.33	AMP	5	60	0.083	No
SAMHD1		20q11.23	AMP	5	60	0.083	Yes
ISY1		3q21.3	AMP	5	60	0.083	No
GPR162		12p13	AMP	5	60	0.083	No
TACC3	1.845e-05	4p16.3	AMP	5	60	0.083	No
SBSN		19q13.12	AMP	5	60	0.083	No
SPMIP3	2.514e-07	1q44	AMP	5	60	0.083	No
MPZL2		11q23.3	AMP	5	60	0.083	No
MFSD5		12q13.13	AMP	5	60	0.083	No
UBR5		8q22.3	AMP	5	60	0.083	Yes
CRABP2		1q23.1	AMP	5	60	0.083	No
CRIM1		2p22.2	AMP	5	60	0.083	No
NF1	2.495e-09	17q11.2	HOMDEL	5	60	0.083	Yes
CHIT1		1q32.1	AMP	5	60	0.083	No
S100A6		1q21.3	AMP	5	60	0.083	No
CHKA		11q13.2	AMP	5	60	0.083	No
RPL23A	8.434e-06	17q11.2	AMP	5	60	0.083	No
ZNF670	2.514e-07	1q44	AMP	5	60	0.083	No
STX16		20q13.32	AMP	5	60	0.083	No
AKR1B15		7q33	AMP	5	60	0.083	No
RARG		12q13.13	AMP	5	60	0.083	No
FAM187B		19q13.12	AMP	5	60	0.083	No
ZNF496	2.514e-07	1q44	AMP	5	60	0.083	No
TMEM267		5p12	AMP	5	60	0.083	No
RLBP1		15q26.1	AMP	5	60	0.083	No
ZC3H11A		1q32.1	AMP	5	60	0.083	No
ZFPM2		8q23	AMP	5	60	0.083	No
S100A2		1q21.3	AMP	5	60	0.083	No
S100A3		1q21.3	AMP	5	60	0.083	No
S100A4		1q21.3	AMP	5	60	0.083	No
PLCZ1		12p12.3	AMP	5	60	0.083	No
S100A5		1q21.3	AMP	5	60	0.083	No
TRPC4AP		20q11.22	AMP	5	60	0.083	No
IFFO1		12p13.31	AMP	5	60	0.083	No
LINC00588		8q12.1	AMP	5	60	0.083	No
LRRC23		12p13.31	AMP	5	60	0.083	No
SLC25A36		3q23	AMP	5	60	0.083	No
OXER1		2p21	AMP	5	60	0.083	No
CDH4		20q13.33	AMP	5	60	0.083	Yes
IRF5		7q32.1	AMP	5	60	0.083	No
GOLT1A		1q32.1	AMP	5	60	0.083	No
GAPDH		12p13.31	AMP	5	60	0.083	No
FMOD		1q32.1	AMP	5	60	0.083	No
SPSB2		12p13.31	AMP	5	60	0.083	No
LYST	2.514e-07	1q42.3	AMP	5	60	0.083	No
PPIF		10q22.3	AMP	5	60	0.083	No
DCAF7		17q23.3	AMP	5	60	0.083	No
SMG1P5		16p11.2	AMP	5	60	0.083	No
C17ORF99		17q25.3	AMP	5	60	0.083	No
INE1		Xp11.3	AMP	5	60	0.083	No
EVI2B	2.495e-09	17q11.2	HOMDEL	5	60	0.083	No
ARRDC4		15q26.2	AMP	5	60	0.083	No
KDM5A		12p13.33	AMP	5	60	0.083	Yes
TMEM199		17q11.2	AMP	5	60	0.083	No
NDUFS2		1q23.3	AMP	5	60	0.083	No
TRPM2		21q22.3	AMP	5	60	0.083	No
KCNS1		20q13.12	AMP	5	60	0.083	No
TRPS1		8q23.3	AMP	5	60	0.083	No
KMT2B		19q13.12	AMP	5	60	0.083	Yes
ZNF738		19p12	AMP	5	60	0.083	No
TMC8		17q25.3	AMP	5	60	0.083	No
KCNG3		2p21	AMP	5	60	0.083	No
SLC46A1	8.434e-06	17q11.2	AMP	5	60	0.083	No
MROH6		8q24.3	AMP	5	60	0.083	No
ARHGDIA		17q25.3	AMP	5	60	0.083	No
NDUFS8		11q13.2	AMP	5	60	0.083	No
FBXO4		5p13.1	AMP	5	60	0.083	No
SBF1P1		8q12.1	AMP	5	60	0.083	No
C1ORF43		1q21.3	AMP	5	60	0.083	No
CAP1		1p34.2	AMP	5	60	0.083	No
ABCA9		17q24.2	AMP	5	60	0.083	No
ABCA8		17q24.2	AMP	5	60	0.083	No
FEZ2		2p22.2	AMP	5	60	0.083	No
TRAPPC10		21q22.3	AMP	5	60	0.083	No
ZNF585A		19q13.12	AMP	5	60	0.083	No
ADAMTS4		1q23.3	AMP	5	60	0.083	No
FASTKD3		5p15.31	AMP	5	60	0.083	No
SAMD12		8q24.11-q24.12	AMP	5	60	0.083	No
DSCC1		8q24.12	AMP	5	60	0.083	No
FCER1G		1q23.3	AMP	5	60	0.083	No
UBAP2L		1q21.3	AMP	5	60	0.083	No
SEC24C		10q22.2	AMP	5	60	0.083	No
TMEM68		8q12.1	AMP	5	60	0.083	No
NAPRT		8q24.3	AMP	5	60	0.083	No
NPHS1		19q13.12	AMP	5	60	0.083	No
ISG20		15q26.1	AMP	5	60	0.083	No
PDXK		21q22.3	AMP	5	60	0.083	No
JADE3		Xp11.3	AMP	5	60	0.083	No
SOAT2		12q13.13	AMP	5	60	0.083	No
FAIM		3q22.3	AMP	5	60	0.083	No
PRODH2		19q13.12	AMP	5	60	0.083	No
KIF26A		14q32.33	AMP	5	60	0.083	No
RBL1		20q11.23	AMP	5	60	0.083	No
PROCA1	8.434e-06	17q11.2	AMP	5	60	0.083	No
TNRC6C		17q25.3	AMP	5	60	0.083	No
LINC00924		15q26.2	AMP	5	60	0.083	No
ARHGAP33		19q13.12	AMP	5	60	0.083	No
COL4A2	0.08857	13q34	AMP	5	60	0.083	No
LSR		19q13.12	AMP	5	60	0.083	No
COL4A1	0.08857	13q34	AMP	5	60	0.083	No
OR2L1P	2.514e-07	1q44	AMP	5	60	0.083	No
OR2L2	2.514e-07	1q44	AMP	5	60	0.083	No
DDX47		12p13.1	AMP	5	60	0.083	No
WASH8P		12p13.33	AMP	5	60	0.083	No
COL2A1		12q13.11	AMP	5	60	0.083	Yes
OR2M4	2.514e-07	1q44	AMP	5	60	0.083	No
UQCRB		8q22.1	AMP	5	60	0.083	No
TACO1		17q23.3	AMP	5	60	0.083	No
THEM6		8q24.3	AMP	5	60	0.083	No
ALPK2		18q21.31-q21.32	AMP	5	60	0.083	No
LITAF		16p13.13	AMP	5	60	0.083	No
TMEM147		19q13.12	AMP	5	60	0.083	No
TANC2		17q23.2-q23.3	AMP	5	60	0.083	No
TBCB		19q13.12	AMP	5	60	0.083	No
MFSD2A		1p34.2	AMP	5	60	0.083	No
TUBGCP3	0.08857	13q34	AMP	5	60	0.083	No
IDH2		15q26.1	AMP	5	60	0.083	Yes
RBP2		3q23	AMP	5	60	0.083	No
IHH		2q35	AMP	5	60	0.083	No
PDLIM2		8p21.3	HOMDEL	5	60	0.083	No
CDK2		12q13.2	AMP	5	60	0.083	No
DOC2A		16p11.2	AMP	5	60	0.083	No
MYCL		1p34.2	AMP	5	60	0.083	Yes
[truncated: 15,282 more rows]
