# Supplementary material for: Molecular subtyping of endometrial carcinoma cell lines uncovers subtype-specific targetable vulnerabilities
Source: Research Square preprint supplement (doi:10.21203/rs.3.rs-6536216/v1), 2025-05-10
Supplement: Supplementary file 6 [file f10cdf128eee9c6262c8845d.xlsx]

## Sheet: Supplementary Table S9
Table S4. Genetic dependency scores of MMRd endometrial cancer cell lines vs p53abn endometrial cancer cell lines. Genome-wide CRISPR screen data was downloaded from the DepMap database.
Gene Name	MMRd_mean	p53abn_mean	Difference	p
A1BG	-0.061102	0.0554685	0.11657	0.0493839
A1CF	-0.0911627	-0.143376	-0.052213	0.168683
A2M	0.0895497	0.0296616	-0.0598881	0.187225
A2ML1	0.0244937	0.0362488	0.0117551	0.597587
A3GALT2	-0.138348	-0.153464	-0.0151159	0.977872
A4GALT	0.0507971	0.0961754	0.0453783	0.419239
A4GNT	0.0515333	0.0787193	0.0271861	0.559428
AAAS	-0.144894	-0.108437	0.0364568	0.802828
AACS	0.00982618	-0.0279845	-0.0378107	0.419239
AADAC	0.146577	0.129205	-0.0173724	0.387594
AADACL2	0.0115656	0.031548	0.0199823	0.760193
AADACL3	0.0699314	0.00326622	-0.0666652	0.0567662
AADACL4	-0.0831714	-0.0139397	0.0692317	0.0196077
AADAT	-0.0459284	-0.0811357	-0.0352073	0.977872
AAGAB	0.0301372	0.025885	-0.00425217	0.933698
AAK1	-0.189222	-0.140935	0.048287	0.301379
AAMDC	-0.031952	-0.0224303	0.0095217	0.846049
AAMP	-1.23551	-1.17418	0.0613295	0.597587
AANAT	-0.0664044	-0.0150647	0.0513397	0.187225
AAR2	0.0160619	-0.0106355	-0.0266973	0.597587
AARD	-0.153056	-0.0767802	0.0762762	0.301379
AARS1	-2.2257	-2.06262	0.163076	0.301379
AARS2	-0.338944	-0.207521	0.131424	0.35738
AARSD1	-0.187593	-0.173833	0.0137598	0.933698
AASDH	-0.117853	-0.102144	0.0157098	0.387594
AASDHPPT	-0.244943	-0.215451	0.0294918	0.889705
AASS	-0.0134965	-0.0265096	-0.013013	0.977872
AATF	-0.927305	-0.85608	0.0712252	0.275614
AATK	-0.0927783	-0.0911283	0.00164993	0.977872
ABAT	-0.0196287	-0.00930015	0.0103285	0.846049
ABCA1	0.0197702	0.0484854	0.0287152	0.760193
ABCA10	0.0219219	-0.124646	-0.146568	0.0116066
ABCA12	-0.0330302	-0.0201581	0.0128721	0.846049
ABCA13	0.110776	0.0636808	-0.0470954	0.20715
ABCA2	0.0959355	0.126795	0.0308597	0.718231
ABCA3	0.0399059	-0.0262695	-0.0661754	0.187225
ABCA4	-0.23432	-0.268722	-0.0344019	0.275614
ABCA5	-0.0165081	-0.0944693	-0.0779613	0.187225
ABCA6	-0.0654292	-0.141972	-0.0765426	0.522457
ABCA7	0.0779235	0.0969292	0.0190057	0.889705
ABCA8	-0.0674422	-0.0883996	-0.0209574	0.718231
ABCA9	-0.0374518	-0.0194404	0.0180114	0.486717
ABCB1	-0.138789	-0.160398	-0.021609	0.760193
ABCB10	-0.038046	-0.0297938	0.00825216	0.977872
ABCB11	-0.0834582	-0.169202	-0.0857434	0.074136
ABCB4	-0.0973063	-0.167104	-0.0697976	0.35738
ABCB5	-0.125447	-0.118554	0.00689277	0.419239
ABCB6	0.0847484	0.036383	-0.0483654	0.151509
ABCB7	-1.29854	-0.783994	0.514548	0.0013774
ABCB8	0.103689	0.0918456	-0.0118433	0.977872
ABCB9	0.118771	0.140474	0.0217027	0.760193
ABCC1	0.00232149	-0.0416573	-0.0439788	0.228513
ABCC10	-0.180555	-0.117437	0.0631181	0.168683
ABCC11	-0.0107087	-0.0270636	-0.016355	0.718231
ABCC12	0.210628	0.199174	-0.0114545	0.387594
ABCC2	-0.090762	-0.0894878	0.00127418	0.977872
ABCC3	-0.0417095	-0.0286868	0.0130227	0.522457
ABCC4	0.134478	0.130278	-0.0042	0.933698
ABCC5	0.0228704	0.0960269	0.0731564	0.0842448
ABCC6	0.0188896	0.00233158	-0.016558	0.857143
ABCC8	0.181376	0.203531	0.0221552	0.677084
ABCC9	-0.126668	-0.104167	0.0225013	0.889705
ABCD1	-0.169006	-0.107095	0.0619104	0.187225
ABCD2	-0.0998988	-0.103024	-0.00312481	0.522457
ABCD3	-0.212427	-0.14674	0.0656871	0.522457
ABCD4	-0.109092	-0.0494291	0.059663	0.107635
ABCE1	-2.18792	-2.11455	0.0733729	0.387594
ABCF1	-1.18518	-0.979877	0.205302	0.301379
ABCF3	0.0925677	-0.00732371	-0.0998914	0.0427954
ABCG1	0.0429781	0.000530249	-0.0424479	0.151509
ABCG2	0.0165976	0.0701307	0.0535331	0.301379
ABCG4	0.0185961	0.00770625	-0.0108899	0.889705
ABCG5	-0.0245267	0.109731	0.134258	0.0138915
ABCG8	0.0431896	-0.0462995	-0.0894891	0.0271516
ABHD1	0.0440738	-0.00223298	-0.0463067	0.0842448
ABHD10	-0.0671869	-0.0785206	-0.0113337	0.977872
ABHD11	-0.317657	-0.247659	0.0699981	0.187225
ABHD12	0.00878248	0.0231086	0.0143262	0.760193
ABHD12B	0.00199474	0.121302	0.119308	0.275614
ABHD13	-0.0485348	-0.138728	-0.0901931	0.0953972
ABHD14A	0.0326884	0.102653	0.0699647	0.0953972
ABHD14B	-0.000885939	-0.0461293	-0.0452434	0.419239
ABHD15	-0.339347	-0.226773	0.112575	0.0427954
ABHD16A	-0.00298493	0.0767304	0.0797153	0.20715
ABHD16B	0.0769701	0.0790446	0.00207452	0.802828
ABHD17A	-0.309157	-0.300004	0.00915244	0.889705
ABHD17B	-0.0378785	-0.0774893	-0.0396108	0.846049
ABHD17C	0.112709	0.0905187	-0.0221905	0.846049
ABHD18	0.0815905	0.112148	0.0305577	0.677084
ABHD2	-0.0442657	-0.118348	-0.074082	0.168683
ABHD3	-0.0560466	-0.0234761	0.0325705	0.802828
ABHD4	0.0485005	0.0045832	-0.0439173	0.301379
ABHD5	-0.0103738	0.048462	0.0588358	0.151509
ABHD6	0.074156	0.10766	0.0335045	0.301379
ABHD8	-0.0579987	0.024245	0.0822438	0.718231
ABI1	-0.161321	-0.105762	0.0555586	0.20715
ABI2	0.0232106	0.00320681	-0.0200038	0.718231
ABI3	0.0947602	0.122267	0.0275065	0.522457
ABI3BP	0.0115605	0.0526689	0.0411084	0.486717
ABITRAM	-0.02626	-0.0363136	-0.0100536	0.677084
ABL1	0.0635167	0.0428272	-0.0206894	1
ABL2	0.031272	0.0573361	0.0260641	0.301379
ABLIM1	0.154209	0.0631855	-0.0910234	0.0493839
ABLIM2	-0.0012704	0.0275468	0.0288172	0.452302
ABLIM3	-0.0244799	-0.00266847	0.0218115	0.636828
ABR	-0.153479	-0.155951	-0.00247256	0.889705
ABRA	0.159456	0.205563	0.0461066	0.452302
ABRACL	0.150994	0.123868	-0.0271261	0.677084
ABRAXAS1	-0.316492	-0.240787	0.0757043	0.228513
ABRAXAS2	0.142358	0.156311	0.0139539	0.486717
ABT1	-1.30305	-1.13598	0.167072	0.452302
ABTB1	0.0195272	-0.0300085	-0.0495357	0.0842448
ABTB2	0.000710788	0.0733554	0.0726446	0.0649925
ABTB3	-0.0383618	0.000677733	0.0390395	0.328645
ACAA1	0.0450147	-0.0325376	-0.0775523	0.559428
ACAA2	-0.0734494	0.00122061	0.07467	0.228513
ACACA	-0.327029	-0.262921	0.0641085	0.559428
ACACB	-0.163552	-0.14676	0.016792	0.802828
ACAD10	-0.0466279	-0.0670215	-0.0203935	0.846049
ACAD11	0.0416331	0.0187209	-0.0229122	0.559428
ACAD8	-0.0482351	-0.0428301	0.00540499	0.802828
ACAD9	-0.305996	-0.269799	0.0361965	0.677084
ACADL	0.00783565	-0.0859066	-0.0937423	0.074136
ACADM	-0.0162395	-0.030199	-0.0139595	0.718231
ACADS	-0.0308504	-0.0495167	-0.0186663	0.597587
ACADSB	0.0399796	0.0139514	-0.0260282	0.387594
ACADVL	0.029121	0.0857669	0.0566459	0.20715
ACAN	0.0340948	0.0869353	0.0528405	0.151509
ACAP1	-0.0345435	-0.0406172	-0.00607373	0.889705
ACAP2	-0.109839	-0.156531	-0.0466921	0.168683
ACAP3	-0.140195	-0.0357864	0.104408	0.0953972
ACAT1	-0.0375498	-0.0063844	0.0311654	0.977872
ACAT2	0.187852	0.199438	0.0115862	0.802828
ACBD3	-0.0713932	-0.0418418	0.0295514	0.677084
ACBD4	-0.0841574	-0.0585976	0.0255598	0.486717
ACBD5	0.0518014	0.00116015	-0.0506413	0.20715
ACBD6	0.00144831	0.123721	0.122273	0.000625558
ACBD7	0.146037	0.0949283	-0.0511087	0.597587
ACCS	0.0155671	0.0283151	0.012748	0.677084
ACCSL	-0.0894036	-0.0763535	0.0130501	0.452302
ACD	-0.340456	-0.276419	0.0640366	0.228513
ACE	-0.178633	-0.22123	-0.0425969	0.328645
ACE2	0.251507	0.239514	-0.0119937	0.522457
ACER1	-0.137636	-0.131726	0.00591052	0.802828
ACER2	0.113888	0.0185179	-0.0953697	0.135637
ACER3	0.0979677	0.0972801	-0.000687577	0.889705
ACHE	-0.228104	-0.2399	-0.0117959	1
ACIN1	-0.782376	-0.603844	0.178533	0.0427954
ACKR1	0.0744706	0.0576081	-0.0168625	0.889705
ACKR2	0.0915681	0.0732115	-0.0183566	0.452302
ACKR3	0.0910092	0.0718885	-0.0191207	0.597587
ACKR4	-0.119287	-0.197524	-0.0782365	0.933698
ACLY	-0.358427	-0.353155	0.00527295	0.760193
ACMSD	0.0103652	0.027015	0.0166499	0.933698
ACO1	0.0276356	-0.0468848	-0.0745205	0.20715
ACO2	-0.625532	-0.814889	-0.189357	0.301379
ACOD1	0.114182	0.162711	0.0485284	0.35738
ACOT1	0.494491	0.31823	-0.176261	0.380952
ACOT11	0.0589993	0.0387871	-0.0202122	0.933698
ACOT12	-0.25017	-0.194095	0.0560742	0.35738
ACOT13	0.0769135	0.103047	0.0261338	0.387594
ACOT2	0.0681663	0.062891	-0.00527532	0.35738
ACOT4	-0.251873	-0.109013	0.142861	0.151509
ACOT6	-0.103459	-0.120523	-0.0170645	0.933698
ACOT7	0.105269	0.121401	0.0161317	0.933698
ACOT8	0.0878581	0.0698259	-0.0180321	0.718231
ACOT9	0.00222858	-0.0518729	-0.0541015	0.486717
ACOX1	-0.210824	-0.250597	-0.0397736	0.636828
ACOX2	-0.0625084	-0.077976	-0.0154676	0.718231
ACOX3	0.0105348	0.0838152	0.0732804	0.151509
ACOXL	-0.364578	-0.355513	0.00906477	1
ACP1	0.125052	0.198465	0.0734137	0.275614
ACP2	-0.0422167	-0.074884	-0.0326674	0.522457
ACP3	-0.0318197	0.0462862	0.078106	0.121035
ACP4	0.064613	0.131814	0.0672011	0.0953972
ACP5	-0.00758928	-0.0183542	-0.010765	0.677084
ACP6	-0.070599	-0.0048267	0.0657723	0.0842448
ACP7	-0.235336	-0.306726	-0.0713902	0.718231
ACR	-0.299043	-0.118416	0.180627	0.00106805
ACRBP	-0.0290603	0.0331765	0.0622368	0.228513
ACRV1	0.237441	0.175644	-0.0617975	0.074136
ACSBG1	0.166348	0.0715041	-0.0948442	0.121035
ACSBG2	0.0797388	0.123378	0.0436397	0.328645
ACSF2	-0.154059	-0.107043	0.0470159	0.301379
ACSF3	0.13831	0.117638	-0.0206722	0.559428
ACSL1	0.151222	0.176301	0.0250785	0.486717
ACSL3	-0.322218	-0.218877	0.10334	0.328645
ACSL4	-0.220045	-0.0832814	0.136764	0.107635
ACSL5	0.016578	0.0781998	0.0616219	0.251322
ACSL6	-0.0583629	-0.0844243	-0.0260613	0.802828
ACSM1	-0.0514384	0.00736927	0.0588076	0.151509
ACSM2A	0.0927148	-0.000237204	-0.092952	0.0567662
ACSM2B	0.183055	0.109229	-0.0738256	0.0196516
ACSM3	0.00330982	0.00326246	-4.73585e-05	0.35738
ACSM4	0.0495922	0.0150327	-0.0345595	0.760193
ACSM5	0.0693448	-0.0374564	-0.106801	0.00175822
ACSM6	0.0627068	0.100019	0.0373118	0.387594
ACSS1	0.0807181	0.1676	0.0868816	0.0369275
ACSS2	0.0981484	0.00759378	-0.0905546	0.107635
ACSS3	0.0373841	0.00744171	-0.0299424	0.419239
ACTA1	-0.0428146	-0.00465448	0.0381601	0.419239
ACTA2	0.120202	0.11082	-0.00938194	0.977872
ACTB	-0.660096	-0.474616	0.18548	0.328645
ACTBL2	0.0162403	0.068968	0.0527276	0.228513
ACTC1	0.00524312	-0.0235977	-0.0288408	0.846049
ACTG1	-0.793249	-0.746524	0.0467245	0.846049
ACTG2	0.0294454	-0.00545257	-0.034898	0.486717
ACTL10	0.220264	0.13907	-0.0811937	0.0649925
ACTL6A	-1.44962	-1.58614	-0.136519	0.35738
ACTL6B	0.1066	0.147621	0.0410219	0.135637
ACTL7A	-0.116838	0.00082563	0.117663	0.0493839
ACTL7B	0.0857088	0.0490477	-0.0366611	0.718231
ACTL8	0.0459945	0.0955698	0.0495753	0.0842448
ACTL9	0.00828564	0.076332	0.0680464	0.228513
ACTMAP	0.188786	0.232285	0.0434997	0.559428
ACTN1	-0.0204845	-0.0706399	-0.0501554	0.328645
ACTN2	0.041234	0.0410181	-0.000215889	0.933698
ACTN4	-0.0144168	-0.00792896	0.00648783	0.846049
ACTR10	-1.53525	-1.60706	-0.0718101	0.718231
ACTR1A	-0.526261	-0.890546	-0.364285	0.121035
ACTR1B	-0.233536	-0.247589	-0.0140527	0.889705
ACTR2	-1.29969	-1.28092	0.0187724	0.889705
ACTR3	-0.540616	-0.571174	-0.0305584	0.846049
ACTR3B	0.0307885	0.0422348	0.0114463	0.597587
ACTR3C	-0.0201124	-0.161442	-0.141329	0.0816962
ACTR5	0.0136283	-0.118966	-0.132595	0.0953972
ACTR6	-0.75254	-0.698184	0.0543556	0.559428
ACTR8	-0.475343	-0.506514	-0.0311707	0.251322
ACTRT1	0.135922	0.124067	-0.011855	0.846049
ACTRT2	0.131234	0.204234	0.0729994	0.151509
ACTRT3	-0.125144	-0.185362	-0.0602179	0.168683
ACVR1	0.0200316	0.0529679	0.0329363	0.522457
ACVR1B	-0.0994503	-0.0890771	0.0103732	1
ACVR1C	0.0239976	0.0412814	0.0172838	0.933698
ACVR2A	-0.128838	-0.127401	0.00143755	0.718231
ACVR2B	0.0302049	0.0574735	0.0272686	0.419239
ACVRL1	0.0234208	-0.0076342	-0.031055	0.35738
ACY1	0.104246	0.130386	0.0261398	0.677084
ACY3	-0.107252	-0.111911	-0.00465952	0.933698
ACYP1	0.0225763	0.0446024	0.0220261	0.522457
ACYP2	0.0555678	0.0471568	-0.008411	0.760193
ADA	-0.0192001	-0.0639376	-0.0447376	0.597587
ADA2	-0.0258152	-0.0762893	-0.0504741	0.35738
ADAD1	0.0854631	0.00866121	-0.0768019	0.074136
ADAD2	0.0311212	-0.00611728	-0.0372385	0.419239
ADAL	-0.0923148	-0.105196	-0.0128811	0.933698
ADAM10	-0.0666735	-0.0240741	0.0425994	0.933698
ADAM11	-0.375783	-0.284652	0.0911313	0.20715
ADAM12	0.0280229	-0.0552661	-0.083289	0.151509
ADAM15	-0.089028	0.0133323	0.10236	0.121035
ADAM17	-0.06409	0.00311542	0.0672055	0.121035
ADAM18	0.231268	0.268474	0.0372064	0.933698
ADAM19	0.174912	0.146568	-0.0283444	0.718231
ADAM2	-0.0980722	-0.0575446	0.0405276	0.328645
ADAM20	0.107958	0.117462	0.00950393	0.846049
ADAM21	-0.0101917	-0.0243894	-0.0141976	0.486717
ADAM22	-0.0962977	-0.206295	-0.109997	0.023129
ADAM23	-0.0271219	-0.053298	-0.0261761	0.846049
ADAM28	0.112112	0.103136	-0.00897581	1
ADAM29	0.0699724	0.0466268	-0.0233456	0.677084
ADAM30	-0.137695	-0.168843	-0.0311478	0.597587
ADAM32	0.00604776	0.0466583	0.0406105	0.846049
ADAM33	-0.0569932	-0.0252917	0.0317016	0.328645
ADAM7	0.0789696	0.0930035	0.0140339	0.718231
ADAM8	0.196905	0.198769	0.00186404	0.933698
ADAM9	-0.089262	-0.063459	0.025803	0.522457
ADAMDEC1	0.0951509	0.031754	-0.0633969	0.151509
ADAMTS1	-0.0540985	-0.0486912	0.00540736	0.559428
ADAMTS10	-0.205494	-0.165757	0.0397374	0.636828
ADAMTS12	0.0590233	0.125365	0.0663418	0.107635
ADAMTS13	0.0938363	0.0450186	-0.0488177	0.419239
ADAMTS14	0.016313	0.0971786	0.0808657	0.228513
ADAMTS15	0.00710883	0.0150457	0.00793688	1
ADAMTS16	0.181389	0.164602	-0.0167866	0.889705
ADAMTS17	0.0131136	0.00928201	-0.00383156	0.760193
ADAMTS18	0.0892138	0.0833995	-0.00581432	0.636828
ADAMTS19	0.0498047	0.0836992	0.0338945	0.677084
ADAMTS2	0.0293968	0.15054	0.121143	0.0649925
ADAMTS20	-0.140262	-0.186941	-0.0466793	0.20715
ADAMTS3	-0.177467	-0.185897	-0.00843016	0.977872
ADAMTS4	-0.198024	-0.153728	0.0442965	0.677084
ADAMTS5	0.0576789	-0.0394218	-0.0971008	0.0196077
ADAMTS6	0.0239708	-0.031429	-0.0553999	0.228513
ADAMTS7	0.208066	-0.0249681	-0.233034	0.0952381
ADAMTS8	0.0831255	0.131933	0.0488072	0.387594
ADAMTS9	-0.134347	-0.161149	-0.0268025	0.452302
ADAMTSL1	0.0439117	0.0951751	0.0512634	0.20715
ADAMTSL2	0.0503527	0.077894	0.0275413	0.889705
ADAMTSL3	0.0492368	-0.0120719	-0.0613087	0.275614
ADAMTSL4	-0.302276	-0.210535	0.0917415	0.0427954
ADAMTSL5	-0.177559	-0.186974	-0.00941485	0.846049
ADAP1	-0.0472234	0.0421006	0.089324	0.35738
ADAP2	-0.285915	-0.121747	0.164169	0.023129
ADAR	-0.502502	-0.841902	-0.339399	0.228513
ADARB1	0.120896	0.0860859	-0.0348104	0.387594
ADARB2	-0.0170151	-0.0199649	-0.00294985	0.559428
ADAT1	-0.0478769	-0.0288029	0.019074	0.889705
ADAT2	-0.0611059	-0.128753	-0.0676472	0.559428
ADAT3	-0.211155	-0.277485	-0.0663294	0.328645
ADCK1	0.0645667	0.00721588	-0.0573509	0.251322
ADCK2	-0.102921	-0.137582	-0.034661	0.168683
ADCK5	-0.0381766	0.00317135	0.041348	0.187225
ADCY1	0.0235948	0.0642245	0.0406297	0.20715
ADCY10	0.104484	0.0639949	-0.0404893	0.636828
ADCY2	0.113463	0.132392	0.0189293	0.677084
ADCY3	-0.0420875	-0.0922117	-0.0501242	0.419239
ADCY4	-0.17936	-0.118599	0.0607613	0.121035
ADCY5	0.336573	0.318449	-0.0181232	0.597587
ADCY6	-0.0482803	-0.0658269	-0.0175466	0.760193
ADCY7	0.192423	0.116167	-0.0762562	0.187225
ADCY8	-0.0578366	-0.037131	0.0207057	0.677084
ADCY9	0.220621	0.170235	-0.0503863	0.486717
ADCYAP1	0.402691	0.379667	-0.0230242	0.35738
ADCYAP1R1	0.116276	0.0554217	-0.0608546	0.187225
ADD1	-0.0717618	-0.0233784	0.0483835	0.0649925
ADD2	0.00868142	-0.0951979	-0.103879	0.023129
ADD3	0.0355895	0.013005	-0.0225845	0.718231
ADGRA1	-0.000684644	0.0549917	0.0556764	0.151509
ADGRA2	0.123098	0.122436	-0.000662026	0.889705
ADGRA3	-0.144022	-0.0862249	0.0577976	0.522457
ADGRB1	0.21692	0.297902	0.0809818	0.35738
ADGRB2	-0.0953124	-0.11302	-0.0177072	0.802828
ADGRB3	-0.0132799	-0.0435798	-0.0302999	0.846049
ADGRD1	0.0140269	-0.026562	-0.0405889	0.20715
ADGRE1	-0.0326502	-0.0632778	-0.0306276	0.328645
ADGRE2	-0.0831245	-0.149557	-0.0664323	0.0842448
ADGRE3	-0.0971831	-0.0564599	0.0407232	0.846049
ADGRE5	0.0775069	0.0656334	-0.0118735	0.636828
ADGRF1	-0.0140495	-0.000559875	0.0134896	0.760193
ADGRF3	0.0512671	0.0792103	0.0279431	0.677084
ADGRF4	0.0378205	0.0409217	0.00310118	0.977872
ADGRF5	-0.244186	-0.172044	0.0721412	0.107635
ADGRG1	-0.0993243	-0.0355223	0.063802	0.228513
ADGRG2	0.149436	0.138918	-0.0105181	0.301379
ADGRG3	-0.077135	-0.148715	-0.0715802	0.135637
ADGRG4	0.0579116	0.00689894	-0.0510127	0.452302
ADGRG5	0.00911363	0.0629708	0.0538571	0.328645
ADGRG6	0.16487	0.172797	0.0079276	0.802828
ADGRG7	-0.0798761	-0.0668493	0.0130268	0.559428
ADGRL1	0.0782752	-0.0355383	-0.113813	0.0567662
ADGRL2	-0.0960003	-0.204585	-0.108585	0.121035
ADGRL3	-0.0941308	-0.0672052	0.0269256	0.20715
ADGRL4	-0.0251214	-0.0575656	-0.0324443	0.275614
ADGRV1	-0.0613294	-0.0474822	0.0138472	0.889705
ADH1A	0.103441	0.020663	-0.0827784	0.107635
ADH1B	0.0778389	0.0654023	-0.0124365	0.35738
ADH4	0.116514	0.122749	0.00623526	0.677084
ADH5	-0.322264	-0.278967	0.0432971	0.718231
ADH6	-0.0237104	-0.00365277	0.0200576	0.977872
ADH7	0.212065	0.128507	-0.0835581	0.168683
ADHFE1	-0.171304	-0.225439	-0.0541351	0.301379
ADI1	0.101727	0.0539577	-0.0477694	0.228513
ADIG	0.0414656	-0.0163509	-0.0578164	0.20715
ADIPOQ	0.162247	0.176086	0.0138391	0.977872
ADIPOR1	0.0350853	0.112018	0.0769325	0.0842448
ADIPOR2	0.0373274	0.0283024	-0.009025	0.889705
ADIRF	-0.0532517	-0.103688	-0.0504359	0.168683
ADK	0.0338919	0.119526	0.0856345	0.187225
ADM	0.0338669	-0.0035849	-0.0374518	0.559428
ADM2	0.0354619	0.0967827	0.0613208	0.0953972
ADM5	-0.0520622	-0.0403496	0.0117126	1
ADNP	-0.121142	-0.2246	-0.103458	0.301379
ADNP2	-0.0915127	-0.0482855	0.0432273	0.636828
ADO	0.087332	0.0306031	-0.0567288	0.275614
ADORA1	-0.0420665	-0.069485	-0.0274185	0.35738
ADORA2A	0.0725781	0.134002	0.061424	0.023129
ADORA2B	-0.0166819	0.0753107	0.0919926	0.0649925
ADORA3	0.150289	0.105393	-0.0448956	0.857143
ADPGK	0.131177	0.0644593	-0.0667181	0.0369275
ADPRH	-0.0841863	0.0171476	0.101334	0.121035
ADPRHL1	-0.109347	0.0166222	0.125969	0.0116066
ADPRM	0.0374183	-0.0023354	-0.0397537	0.275614
ADPRS	-0.153142	-0.159344	-0.0062023	0.802828
ADRA1A	0.119183	0.114091	-0.00509227	0.522457
ADRA1B	0.00993985	0.0259483	0.0160085	0.889705
ADRA1D	0.10233	0.0566345	-0.0456959	0.486717
ADRA2A	0.208065	0.154998	-0.0530674	0.168683
ADRA2B	-0.0819613	-0.116276	-0.0343152	0.228513
ADRA2C	0.038794	0.00638412	-0.0324099	0.718231
ADRB1	0.168294	0.139886	-0.0284078	0.452302
ADRB2	0.0443079	0.0551179	0.01081	0.168683
ADRB3	0.0397301	0.0492378	0.00950765	0.677084
ADRM1	-0.4978	-0.159974	0.337826	0.00082233
ADSL	-0.918303	-0.713856	0.204447	0.228513
ADSS1	-0.00847014	0.124538	0.133008	0.0842448
ADSS2	-0.473841	-0.398579	0.0752613	0.597587
ADTRP	0.0609708	0.0596578	-0.00131294	0.718231
AEBP1	0.0730843	0.0432102	-0.029874	0.597587
AEBP2	0.0531659	0.0805501	0.0273842	0.387594
AEN	-0.0572492	-0.00638206	0.0508671	0.419239
AFAP1	0.0786295	0.121276	0.0426466	0.387594
AFAP1L1	0.0218606	0.0343695	0.0125089	0.275614
AFAP1L2	-0.0210357	-0.0296039	-0.00856817	0.760193
AFDN	-0.0141348	-0.119169	-0.105034	0.151509
AFF1	0.0654252	-0.0204361	-0.0858613	0.023129
AFF2	0.113897	0.0239896	-0.0899071	0.0369275
AFF3	-0.198348	-0.205483	-0.00713446	1
AFF4	-0.0669591	-0.102622	-0.0356625	0.387594
AFG1L	0.0573622	0.126434	0.0690716	0.35738
AFG3L2	-1.24199	-1.09396	0.148032	0.251322
AFM	0.0300413	-0.0267447	-0.056786	0.328645
AFMID	0.0188601	-0.0103005	-0.0291606	0.486717
AFP	-0.0987099	-0.0230801	0.0756298	0.0567662
AFTPH	0.0586435	0.023637	-0.0350065	0.486717
AGA	0.109811	0.0177805	-0.0920309	0.228513
AGAP1	0.0347036	0.0860504	0.0513468	0.387594
AGAP2	-0.293824	-0.285988	0.00783551	0.802828
AGAP3	0.147246	0.0998377	-0.0474081	0.452302
AGAP5	-0.527293	-0.572805	-0.0455121	0.569891
AGAP6	-0.495363	-0.482467	0.0128962	1
AGAP9	-0.33423	-0.295614	0.0386161	0.616343
AGBL1	0.077084	0.0266606	-0.0504234	0.107635
AGBL2	0.0292319	0.0468947	0.0176628	0.846049
AGBL3	-0.239551	-0.209776	0.0297752	0.977872
AGBL4	-0.149236	-0.115656	0.0335798	0.419239
AGBL5	-0.0643818	-0.0245198	0.039862	0.107635
AGER	0.05465	0.0668656	0.0122155	0.977872
AGFG1	0.0866148	0.0903934	0.00377869	0.977872
AGFG2	-0.040356	-0.0456035	-0.00524743	0.846049
AGGF1	0.137716	0.154756	0.01704	0.452302
AGK	-0.060673	-0.0267485	0.0339245	0.846049
AGL	-0.159188	-0.194336	-0.0351483	0.168683
AGMAT	0.0200807	-0.0045918	-0.0246725	0.677084
AGMO	0.0613914	0.0141595	-0.0472319	0.121035
AGO1	-0.149538	-0.141341	0.00819626	0.486717
AGO2	0.0883835	0.0906994	0.00231591	0.977872
AGO3	-0.168786	-0.166005	0.00278138	0.889705
AGO4	-0.0705302	-0.112421	-0.0418909	0.275614
AGPAT1	-0.0477988	-0.0731386	-0.0253398	0.802828
AGPAT2	-0.0797215	-0.0738415	0.00588	0.933698
AGPAT3	0.100657	0.0825075	-0.0181499	0.559428
AGPAT4	0.183977	0.154337	-0.0296401	0.486717
AGPAT5	0.06825	0.062688	-0.00556195	0.802828
AGPS	0.0431707	0.0386328	-0.0045379	0.933698
AGR2	0.00327976	-0.000302435	-0.0035822	0.933698
AGR3	-0.0445535	-0.0355088	0.00904471	0.486717
AGRN	-0.0837159	-0.100769	-0.0170535	0.677084
AGRP	-0.125161	-0.0877975	0.037364	0.35738
AGT	0.0321347	0.0694857	0.037351	0.328645
AGTPBP1	0.0265932	0.00734944	-0.0192438	0.486717
AGTR1	-0.0532504	-0.144534	-0.0912839	0.135637
AGTR2	0.0163635	-0.0380063	-0.0543698	0.486717
AGTRAP	0.127389	0.107109	-0.0202805	0.677084
AGXT	0.13277	0.160209	0.027439	0.597587
AGXT2	0.116658	0.1605	0.043842	0.275614
AHCTF1	-1.12163	-1.0838	0.0378287	0.636828
AHCY	-0.665395	-0.427274	0.238121	0.0649925
AHCYL1	-0.373058	-0.444006	-0.0709486	0.889705
AHCYL2	-0.0934042	-0.0393172	0.054087	0.677084
AHDC1	-0.125724	-0.181403	-0.0556797	0.522457
AHI1	-0.0915785	-0.113571	-0.0219921	0.35738
AHNAK	-0.254958	-0.281163	-0.0262043	0.889705
AHNAK2	0.128287	0.16516	0.0368732	0.977872
AHR	-0.0164374	0.0977809	0.114218	0.121035
AHRR	-0.0534233	-0.051389	0.00203429	0.889705
AHSA1	-0.115736	0.00391747	0.119654	0.107635
AHSG	-0.0344048	-0.0442638	-0.00985907	0.802828
AHSP	0.0578658	0.11793	0.0600638	0.419239
AICDA	0.0328037	0.0582215	0.0254178	0.251322
AIDA	0.0109883	-0.0124301	-0.0234185	0.933698
AIF1	-0.221223	-0.206049	0.0151738	0.718231
AIF1L	-0.146468	-0.0335735	0.112895	0.023129
AIFM1	-0.273741	-0.217708	0.0560332	0.486717
AIFM2	-0.0412667	0.0325674	0.0738341	0.452302
AIFM3	-0.0995749	-0.0540723	0.0455026	0.452302
AIG1	0.0870497	0.0763891	-0.0106606	0.802828
AIM2	0.0152754	0.129914	0.114639	0.023129
AIMP1	-0.116242	-0.133743	-0.0175012	0.846049
AIMP2	-0.250061	-0.157238	0.0928231	0.151509
AIP	-0.0874131	0.0534888	0.140902	0.0138915
AIPL1	-0.0719439	-0.0521483	0.0197956	0.718231
AIRE	0.176437	0.148327	-0.0281106	0.677084
AJAP1	0.072626	-0.0158178	-0.0884438	0.135637
AJM1	-0.203484	-0.20401	-0.000526411	0.977872
AJUBA	-0.0326299	-0.00898055	0.0236493	0.419239
AK1	-0.253689	-0.176795	0.076894	0.151509
AK2	-0.0663008	0.0290226	0.0953234	0.20715
AK3	0.014828	-0.135273	-0.150101	0.074136
AK4	-0.54359	-0.360188	0.183402	0.151509
AK5	0.10134	0.0422466	-0.059093	0.677084
AK6	-1.22084	-1.00585	0.214988	0.559428
AK7	0.0490728	0.0512949	0.00222212	1
AK8	-0.1065	-0.084984	0.0215163	0.933698
AK9	0.0437699	0.0721288	0.0283589	0.419239
AKAIN1	0.205791	0.203866	-0.0019245	0.889705
AKAP1	-0.0506697	-0.0960904	-0.0454207	0.301379
AKAP10	-0.101249	-0.0574667	0.0437824	0.486717
AKAP11	-0.0205435	0.0476704	0.0682139	0.452302
AKAP12	-0.0473711	-0.0802482	-0.0328771	0.559428
AKAP13	0.064191	0.00455412	-0.0596369	0.168683
AKAP14	0.013405	0.00920624	-0.00419878	0.452302
AKAP3	-0.125799	-0.181357	-0.055558	0.228513
AKAP4	-0.034051	-0.0645478	-0.0304968	0.301379
AKAP5	-0.0303812	-0.0105303	0.0198509	1
AKAP6	-0.0675297	-0.0118635	0.0556662	0.760193
AKAP7	0.0176364	0.115938	0.0983012	0.00433975
AKAP8	0.0182551	-0.0509522	-0.0692073	0.074136
AKAP8L	-0.143226	-0.324156	-0.18093	0.00106805
AKAP9	-0.0685251	-0.01066	0.0578651	0.074136
AKIP1	-0.134224	-0.0818362	0.0523878	0.275614
AKIRIN1	-0.270927	-0.212558	0.0583687	0.522457
AKIRIN2	-1.0348	-1.07921	-0.0444113	0.846049
AKNA	-0.117298	-0.10168	0.0156183	0.301379
AKNAD1	-0.181744	-0.106251	0.0754936	0.0953972
AKR1A1	0.103433	0.113459	0.0100257	0.846049
AKR1B1	0.125808	-0.0263154	-0.152124	0.0567662
AKR1B10	0.110834	0.0694173	-0.0414166	0.486717
AKR1B15	-0.128331	-0.191403	-0.0630713	0.275614
AKR1C2	0.0284201	-0.0777362	-0.106156	0.151509
AKR1C3	-0.0190954	0.0334346	0.05253	0.718231
AKR1C4	0.146274	0.159025	0.0127505	0.677084
AKR1D1	-0.172625	-0.0670897	0.105536	0.074136
AKR1E2	0.145359	0.183126	0.0377677	0.251322
AKR7A2	-0.0202847	0.100573	0.120858	0.0953972
AKR7A3	-0.0281773	-0.0879521	-0.0597748	0.977872
AKT1	-0.06672	-0.00105522	0.0656648	0.559428
AKT1S1	0.0851396	0.110255	0.0251154	0.636828
AKT2	0.144784	0.0594456	-0.0853381	0.636828
AKT3	0.0615726	0.0197413	-0.0418312	0.0953972
AKTIP	-0.362421	-0.340751	0.0216704	0.760193
ALAD	-0.0852542	-0.0502914	0.0349628	0.0369275
ALAS1	-0.21112	-0.1966	0.0145201	0.559428
ALAS2	0.0715868	0.121036	0.0494493	0.228513
ALB	0.120482	0.0319452	-0.0885364	0.0953972
ALCAM	-0.122368	-0.0379483	0.0844197	0.228513
ALDH16A1	-0.00807423	0.0278612	0.0359354	0.522457
ALDH18A1	-0.0855732	-0.0927433	-0.00717008	0.760193
ALDH1A1	0.0136362	0.00720656	-0.00642962	0.977872
ALDH1A2	-0.101334	-0.0734232	0.027911	0.522457
ALDH1A3	0.141742	0.112932	-0.0288106	0.760193
ALDH1B1	0.00390023	0.0119503	0.0080501	0.802828
ALDH1L1	0.0570137	0.0870709	0.0300573	0.636828
ALDH1L2	-0.0827256	-0.0910352	-0.00830956	0.677084
ALDH2	0.0907467	0.077972	-0.0127746	0.760193
ALDH3A1	0.0909743	0.0744807	-0.0164936	0.387594
ALDH3A2	0.04583	0.00190771	-0.0439222	0.328645
ALDH3B2	0.217194	0.210374	-0.00681929	0.597587
ALDH4A1	-0.08068	0.0120889	0.0927689	0.00433975
ALDH5A1	0.0390931	-0.027536	-0.0666291	0.135637
ALDH6A1	-0.0485949	0.0216344	0.0702293	0.0369275
ALDH7A1	-0.0360493	0.00138712	0.0374364	0.168683
ALDH8A1	0.0582245	0.074489	0.0162645	0.760193
ALDH9A1	-0.166282	-0.140457	0.0258253	0.933698
ALDOA	-1.18362	-1.1812	0.00242568	0.889705
ALDOB	-0.0820447	-0.0769519	0.00509281	0.718231
ALDOC	-0.496868	-0.242939	0.253928	0.00280278
ALG1	-0.956669	-0.873734	0.0829355	0.301379
ALG10	-0.201452	-0.110769	0.0906826	0.0953972
ALG10B	-0.327846	-0.220211	0.107635	0.419239
ALG11	-1.39176	-1.577	-0.18524	0.636828
ALG12	0.000332996	0.0372892	0.0369562	0.419239
ALG13	-0.931381	-1.04824	-0.116857	0.419239
ALG14	-0.930563	-0.848345	0.0822175	0.559428
ALG2	-1.31953	-1.28633	0.0331993	0.452302
ALG3	-0.00690051	-0.00208381	0.0048167	0.889705
ALG5	-0.250774	-0.367391	-0.116618	0.0842448
ALG6	-0.233985	-0.213791	0.0201931	0.760193
ALG8	-0.24106	-0.376167	-0.135107	0.121035
ALG9	-0.128485	-0.153218	-0.0247332	0.419239
ALK	-0.0494331	-0.0331539	0.0162792	0.522457
ALKAL1	-0.135494	-0.138058	-0.00256364	0.889705
ALKAL2	0.222368	0.199451	-0.0229167	0.677084
ALKBH1	-0.100819	-0.0856491	0.0151703	0.677084
ALKBH2	-0.0234635	-0.0536461	-0.0301826	0.452302
ALKBH3	-0.160287	-0.191714	-0.0314267	0.328645
ALKBH4	-0.227332	-0.174403	0.0529291	0.187225
ALKBH5	-0.178948	-0.203187	-0.0242382	0.328645
ALKBH6	0.135564	0.0625627	-0.0730017	0.452302
ALKBH7	-0.267615	-0.263595	0.00401971	0.933698
ALKBH8	-0.0962683	-0.0288861	0.0673822	0.151509
ALLC	-0.136837	-0.0894874	0.0473496	0.0427954
ALMS1	-0.169273	-0.198235	-0.0289622	0.328645
ALOX12	0.1988	0.139882	-0.0589178	0.0953972
ALOX12B	0.0406526	0.0284207	-0.0122319	0.760193
ALOX15	-0.0122378	0.0978205	0.110058	0.0317361
ALOX15B	0.0196851	0.0346157	0.0149305	0.846049
ALOX5	-0.118792	-0.15824	-0.0394475	0.522457
ALOX5AP	0.093178	0.0614272	-0.0317508	0.275614
ALOXE3	-0.0571777	-0.0626624	-0.00548462	0.559428
ALPG	0.0508252	0.024693	-0.0261322	0.760193
ALPI	0.0568979	0.11746	0.0605625	0.228513
ALPK1	-0.059125	-0.065899	-0.00677404	0.846049
ALPK2	0.225688	0.232531	0.00684216	0.559428
ALPK3	-0.181134	-0.412713	-0.231579	0.190476
ALPL	0.0564915	0.0463693	-0.0101222	0.977872
ALPP	0.143864	0.144587	0.00072279	0.933698
ALS2	-0.0227544	-0.0226403	0.000114169	0.718231
ALS2CL	-0.0389691	-0.028383	0.0105861	0.522457
ALX1	0.00138121	0.0667334	0.0653522	0.121035
ALX3	-0.310777	-0.469004	-0.158227	0.074136
ALX4	-0.01174	0.107532	0.119272	0.0196077
ALYREF	-1.24573	-1.25221	-0.00648708	0.977872
AMACR	0.0563999	-0.0306774	-0.0870773	0.0271516
AMBN	-0.115027	0.0442613	0.159289	0.0493839
AMBP	0.0207075	0.114824	0.0941169	0.121035
AMBRA1	-0.100341	-0.0905804	0.00976079	0.933698
AMD1	-0.499249	-0.218029	0.28122	0.0369275
AMDHD1	-0.108443	-0.115783	-0.00734003	0.760193
AMDHD2	-0.0670663	-0.132871	-0.0658049	0.301379
AMELX	0.0844022	0.0613862	-0.023016	0.559428
AMELY	0.374349	0.405381	0.031032	0.857143
AMER1	0.0197433	0.0365086	0.0167654	0.802828
AMER2	-0.202754	-0.0256314	0.177123	0.000471861
AMER3	-0.264099	-0.195014	0.0690852	0.107635
AMFR	0.0311214	0.0327831	0.00166169	0.597587
AMH	0.14309	0.0787197	-0.0643707	0.107635
AMHR2	0.0194411	0.0595927	0.0401516	0.301379
AMIGO1	-0.115064	-0.109687	0.00537681	0.933698
AMIGO2	0.0308261	0.0501735	0.0193474	0.452302
AMIGO3	-0.0674852	-0.115939	-0.0484535	0.328645
AMMECR1	0.0453133	0.069501	0.0241878	0.452302
AMMECR1L	-0.214059	-0.232872	-0.0188136	0.846049
AMN	0.107333	0.052945	-0.0543877	0.522457
AMN1	0.150729	0.138589	-0.0121399	0.522457
AMOT	0.0494189	0.0589146	0.00949564	0.636828
AMOTL1	0.0204463	0.0194074	-0.00103893	0.846049
AMOTL2	0.0760207	0.160579	0.0845584	0.228513
AMPD1	-0.300323	-0.283733	0.0165901	0.802828
AMPD2	-0.0858631	-0.111122	-0.0252584	0.522457
AMPD3	-0.00748501	-0.0441606	-0.0366756	0.387594
AMPH	0.0817186	0.0593969	-0.0223217	0.636828
AMT	-0.00342101	-0.0105193	-0.00709832	0.802828
AMTN	0.0630657	0.0400364	-0.0230294	0.35738
AMY2A	-0.322968	-0.378651	-0.0556831	0.452302
AMZ1	0.00334764	0.127788	0.12444	0.023129
AMZ2	-0.031157	-0.116335	-0.085178	0.187225
ANAPC1	-1.74007	-1.81169	-0.0716292	0.486717
ANAPC10	-1.5644	-1.36568	0.19872	0.168683
ANAPC11	-1.52691	-1.66431	-0.137407	0.228513
ANAPC13	-0.426956	-0.382722	0.044234	0.419239
ANAPC15	-0.489452	-0.39369	0.0957622	0.559428
ANAPC16	-0.0759149	-0.0309553	0.0449596	0.275614
ANAPC2	-1.23742	-1.32221	-0.0847886	0.933698
ANAPC4	-1.22145	-1.22432	-0.0028687	0.760193
ANAPC5	-1.42247	-1.33903	0.0834399	0.559428
ANAPC7	-0.202764	-0.281354	-0.0785904	0.760193
ANG	-0.11581	-0.0998407	0.0159696	0.559428
ANGEL1	-0.0836166	-0.0247943	0.0588223	0.597587
ANGEL2	-0.126301	-0.150658	-0.0243574	0.559428
ANGPT1	-0.0763423	-0.123911	-0.0475687	0.677084
ANGPT2	0.11489	0.0563925	-0.0584974	0.0493839
ANGPT4	0.235922	0.2417	0.00577778	1
ANGPTL1	-0.057158	-0.0645253	-0.00736727	0.677084
ANGPTL2	0.0683162	0.0123563	-0.05596	0.0953972
ANGPTL3	0.0395858	0.0220491	-0.0175368	0.486717
ANGPTL4	0.00295725	0.0130901	0.0101329	0.889705
ANGPTL5	-0.0681239	-0.0251422	0.0429817	0.802828
ANGPTL6	-0.136217	-0.125499	0.010718	0.933698
ANGPTL7	0.0287026	0.0342422	0.00553954	0.933698
ANGPTL8	0.00865484	0.0522518	0.043597	0.228513
ANHX	-0.134743	0.0384146	0.173158	0.0116066
ANK1	0.0524251	0.0792843	0.0268593	0.933698
ANK2	0.0194215	0.00552578	-0.0138957	0.597587
ANK3	-0.120357	-0.094868	0.0254888	0.486717
ANKAR	0.0633648	0.0168157	-0.0465491	0.559428
ANKDD1A	-0.0832868	-0.0991421	-0.0158552	0.889705
ANKDD1B	0.101026	0.111913	0.0108863	0.677084
ANKEF1	0.107371	0.11116	0.00378928	0.846049
ANKFN1	-0.0488926	0.0565785	0.105471	0.023129
ANKFY1	-0.0971733	-0.0963369	0.000836492	0.846049
ANKH	0.0774131	0.101421	0.0240081	0.522457
ANKHD1	-0.0785276	-0.0524602	0.0260674	0.760193
ANKIB1	-0.0539965	-0.178245	-0.124248	0.135637
ANKK1	0.106118	0.043611	-0.0625074	0.275614
ANKLE1	-0.0756552	-0.0454701	0.0301851	0.597587
ANKLE2	-2.2242	-2.34417	-0.119969	0.486717
ANKMY1	0.0478938	0.00462714	-0.0432666	0.168683
ANKMY2	-0.262507	-0.273538	-0.0110309	0.559428
ANKRA2	-0.239009	-0.33247	-0.0934612	0.35738
ANKRD1	-0.115592	-0.106064	0.00952795	0.889705
ANKRD10	0.0116078	0.0402424	0.0286346	0.597587
ANKRD11	-0.225235	-0.0961165	0.129119	0.301379
ANKRD12	0.0172489	0.0329583	0.0157094	0.718231
ANKRD13A	-0.11135	-0.168022	-0.0566716	0.275614
ANKRD13B	-0.0979204	-0.101963	-0.00404296	0.636828
ANKRD13C	0.05339	-0.0164887	-0.0698787	0.20715
ANKRD13D	-0.00653058	-0.0193405	-0.0128099	0.889705
ANKRD16	-0.0405383	0.109055	0.149593	0.0317361
ANKRD17	-0.276457	-0.225745	0.0507115	0.977872
ANKRD18A	-0.0145558	0.03883	0.0533859	0.419239
ANKRD2	0.196717	0.24073	0.044013	0.718231
ANKRD22	-0.102649	-0.11777	-0.0151209	0.636828
ANKRD23	-0.212853	-0.276764	-0.0639105	0.301379
ANKRD24	-0.0963429	-0.0440393	0.0523036	0.301379
ANKRD26	0.121014	0.0956966	-0.0253178	0.151509
ANKRD27	-0.0750534	-0.201581	-0.126527	0.151509
ANKRD28	-0.0119471	-0.0775656	-0.0656185	0.107635
ANKRD29	0.113371	0.200864	0.0874923	0.023129
ANKRD30A	0.0770405	0.0796783	0.00263781	0.889705
ANKRD30B	0.0306596	0.00950744	-0.0211521	0.977872
ANKRD31	-0.283103	-0.255707	0.0273962	0.20715
ANKRD33	0.00544357	0.054462	0.0490184	0.636828
ANKRD33B	0.0151277	0.00607115	-0.00905654	0.846049
ANKRD34A	-0.099602	-0.133694	-0.0340922	0.559428
ANKRD34B	-0.144601	-0.206171	-0.0615692	0.933698
ANKRD34C	-0.0341852	0.0183277	0.0525129	0.151509
ANKRD35	-0.246363	-0.354678	-0.108314	0.20715
ANKRD36	-0.0868068	-0.22815	-0.141343	0.857143
ANKRD37	0.122014	0.10665	-0.0153632	0.636828
ANKRD39	-0.198636	-0.199323	-0.000686882	0.933698
ANKRD40	-0.0647829	-0.104779	-0.0399959	0.597587
ANKRD42	0.090821	0.0808218	-0.00999928	0.977872
ANKRD44	0.0137187	-0.0499198	-0.0636385	0.0567662
ANKRD45	0.0826307	0.0530882	-0.0295425	0.419239
ANKRD46	0.0456532	-0.0264893	-0.0721425	0.0649925
ANKRD49	-0.173731	-0.0464893	0.127241	0.301379
ANKRD50	0.00777824	-0.0168959	-0.0246742	0.718231
ANKRD52	-0.17792	-0.222049	-0.0441285	0.718231
ANKRD53	-0.0636392	-0.0590474	0.00459184	0.889705
ANKRD54	-0.196266	-0.165507	0.0307582	0.486717
ANKRD55	-0.0263461	0.0952172	0.121563	0.00433975
ANKRD6	-0.0525416	-0.0180818	0.0344598	0.35738
ANKRD61	0.145757	0.175025	0.0292678	0.677084
ANKRD62	0.0169732	0.0404264	0.0234532	0.846049
ANKRD65	-0.263457	-0.19556	0.0678964	0.0953972
ANKRD66	0.142858	0.10114	-0.0417178	0.636828
ANKRD7	0.0522537	0.0689563	0.0167026	0.933698
ANKRD9	0.0102037	-0.00997269	-0.0201764	0.977872
ANKS1A	0.114907	0.104316	-0.0105912	0.760193
ANKS1B	0.0472695	0.00536414	-0.0419053	0.20715
ANKS3	0.0323229	0.0489606	0.0166377	0.802828
ANKS4B	0.0758334	0.0992277	0.0233943	0.559428
ANKS6	-0.148394	-0.0851483	0.0632461	0.228513
ANKZF1	-0.0225351	-0.118956	-0.0964212	0.121035
ANLN	-0.632556	-0.747043	-0.114488	0.522457
ANO1	-0.14931	-0.231854	-0.0825446	0.0842448
ANO10	-0.0308581	-0.0106379	0.0202202	0.251322
ANO2	-0.127503	-0.13091	-0.00340707	0.920336
ANO3	-0.0206214	-0.0300273	-0.00940592	0.933698
ANO4	-0.00614486	-0.0618979	-0.0557531	0.35738
ANO5	-0.0298534	-0.0396048	-0.00975145	0.677084
ANO6	-0.0689869	-0.0351487	0.0338382	0.522457
ANO7	0.0321446	0.0899663	0.0578217	0.121035
ANO8	-0.105665	-0.119609	-0.013944	0.933698
ANO9	0.0739306	0.167	0.0930691	0.135637
ANOS1	0.190352	0.167651	-0.0227009	0.387594
ANP32A	-0.114111	-0.0843335	0.0297773	0.760193
ANP32B	-0.0883163	-0.00742006	0.0808962	0.251322
ANP32D	-0.0543317	-0.0555185	-0.00118679	0.846049
ANP32E	-0.346503	-0.276661	0.0698414	0.121035
ANPEP	0.0623839	0.115071	0.0526875	0.933698
ANTKMT	-0.112745	-0.166716	-0.0539711	0.452302
ANTXR1	0.0194661	-0.016671	-0.0361371	0.977872
ANTXR2	0.0376132	0.0560491	0.0184359	0.802828
ANTXRL	-0.284194	-0.213527	0.0706665	0.20715
ANXA1	0.175388	0.134745	-0.0406424	0.597587
ANXA10	0.117315	0.0945236	-0.0227913	0.636828
ANXA11	0.334791	0.335624	0.000832956	0.597587
ANXA13	-0.012101	-0.0593942	-0.0472932	0.228513
ANXA2	0.0733056	0.0487319	-0.0245736	0.486717
ANXA2R	-0.231121	-0.0522151	0.178906	0.0096428
ANXA3	0.117759	0.0822321	-0.0355268	0.718231
ANXA4	0.0188264	-0.00642037	-0.0252468	0.760193
ANXA5	0.133572	0.145573	0.012001	0.597587
ANXA6	0.0887558	0.206452	0.117696	0.0493839
ANXA7	-0.166646	-0.078892	0.0877543	0.0271516
ANXA8	0.0115779	-0.0369689	-0.0485468	0.126591
ANXA8L1	-0.240268	-0.265972	-0.0257043	0.763949
ANXA9	-0.161142	-0.0658349	0.0953076	0.0842448
AOAH	0.0635746	0.0412634	-0.0223112	0.486717
AOC1	-0.114338	-0.0589965	0.0553413	0.121035
AOC2	-0.108086	-0.0806506	0.0274352	0.387594
AOC3	-0.100417	-0.194354	-0.0939369	0.187225
AOPEP	0.0820402	0.0524422	-0.029598	0.328645
AOX1	0.000560536	-0.00385366	-0.0044142	0.677084
AP1AR	0.150544	0.111299	-0.039245	0.35738
AP1B1	-0.143266	-0.174179	-0.0309129	0.452302
AP1G1	0.0937209	-0.0627373	-0.156458	0.0196077
AP1G2	-0.0245675	0.0670877	0.0916551	0.0567662
AP1M1	-0.0264056	-0.0895376	-0.063132	0.0953972
AP1M2	0.0639539	0.00526763	-0.0586862	0.522457
AP1S1	0.00534703	0.00734715	0.00200012	0.977872
AP1S2	-0.197167	-0.184884	0.0122826	0.889705
AP1S3	-0.000396651	0.0159889	0.0163855	0.889705
AP2A1	0.0100278	0.131062	0.121034	0.0953972
AP2A2	0.0179073	0.0319981	0.0140908	0.522457
AP2B1	-0.0505355	-0.0711148	-0.0205793	0.35738
AP2M1	-0.413036	-0.651838	-0.238802	0.0493839
AP2S1	-0.261301	-0.459841	-0.198541	0.0953972
AP3B1	-0.347066	-0.383854	-0.0367876	0.802828
AP3B2	-0.0156071	0.0595618	0.0751689	0.151509
AP3D1	0.00937063	-0.069165	-0.0785357	0.151509
AP3M1	-0.257162	-0.257151	1.09405e-05	0.933698
AP3M2	-0.206443	-0.151529	0.0549137	0.228513
AP3S1	-0.22855	-0.278174	-0.0496246	0.419239
AP3S2	0.0195405	0.00964816	-0.00989229	0.597587
AP4B1	-0.0483494	-0.0320697	0.0162796	0.802828
AP4E1	-0.0384875	-0.0545441	-0.0160567	0.760193
AP4M1	-0.00525533	0.0412832	0.0465386	0.228513
AP4S1	-0.0477191	-0.0548223	-0.00710318	0.597587
AP5B1	-0.124213	-0.13158	-0.00736733	0.846049
AP5M1	0.0184059	0.0291314	0.0107256	0.889705
AP5S1	0.101983	0.116182	0.0141989	0.636828
AP5Z1	-0.0375278	-0.0647649	-0.0272372	0.522457
APAF1	0.0747816	0.150389	0.0756074	0.387594
APBA1	-0.00996865	-0.00202313	0.00794553	0.760193
APBA2	-0.140237	-0.20303	-0.062793	0.35738
APBA3	0.103441	0.120517	0.0170758	0.802828
APBB1	-0.0199088	-0.0549056	-0.0349968	0.419239
APBB1IP	-0.0470299	-0.0541742	-0.00714428	0.977872
APBB2	0.0920568	0.087641	-0.00441581	0.933698
APBB3	-0.0108662	0.086397	0.0972632	0.0116066
APC	-0.317459	-0.433964	-0.116505	0.275614
APC2	-0.0610399	-0.0363404	0.0246995	0.677084
APCDD1	0.341893	0.28837	-0.0535228	0.135637
APCDD1L	0.0314933	0.106448	0.0749549	0.0842448
APCS	-0.140433	-0.122035	0.0183981	0.597587
APEH	-0.217143	-0.121517	0.0956262	0.0649925
APEX1	-0.0690404	-0.224807	-0.155766	0.00106805
APEX2	-0.181481	-0.241034	-0.0595532	0.559428
APH1A	-0.24722	-0.329135	-0.0819158	0.301379
APH1B	-0.144188	-0.056498	0.0876898	0.107635
API5	-0.117476	-0.182511	-0.0650351	0.301379
APIP	-0.0547098	-0.067866	-0.0131562	0.933698
APLF	0.185661	0.229837	0.0441765	0.328645
APLN	0.0189175	0.0299163	0.0109988	0.718231
APLNR	0.158362	0.111382	-0.0469795	0.0953972
APLP1	-0.200376	-0.249565	-0.0491893	1
APLP2	0.12458	0.117102	-0.00747812	0.933698
APMAP	-0.00701447	0.0751514	0.0821659	0.074136
APOA1	0.0456988	0.0911393	0.0454405	0.275614
APOA2	0.00254139	0.0185892	0.0160478	0.760193
APOA4	0.0816511	0.0381359	-0.0435151	0.597587
APOA5	0.0870378	0.0529901	-0.0340477	0.889705
APOB	-0.0273182	-0.0388133	-0.011495	0.846049
APOBEC1	-0.0758082	-0.00961965	0.0661886	0.168683
APOBEC2	-0.0489851	-0.0276095	0.0213756	0.20715
APOBEC3A	0.0412894	-0.0130406	-0.05433	0.452302
APOBEC3B	0.0591155	-0.0392496	-0.098365	0.20715
APOBEC3C	-0.0614884	-0.184697	-0.123208	0.00796975
APOBEC3D	0.11106	-0.0350359	-0.146095	0.00433975
APOBEC3F	0.208731	0.0868051	-0.121926	0.571429
APOBEC3G	0.0809623	0.136087	0.0551242	0.419239
APOBEC3H	0.000105407	-0.0639372	-0.0640426	0.168683
APOBEC4	-0.0769704	-0.0951498	-0.0181794	0.760193
APOBR	-0.0494885	-0.0548572	-0.00536876	0.977872
APOC1	-0.0804233	-0.129736	-0.0493124	1
APOC2	-0.0179472	-0.062235	-0.0442877	0.933698
APOC3	0.0225277	0.0880378	0.0655101	0.20715
APOC4	0.0460802	0.085216	0.0391357	0.107635
APOD	0.0216839	0.0449189	0.023235	0.522457
APOE	-0.00712534	-0.0586129	-0.0514876	0.718231
APOF	0.0460855	0.140038	0.093952	0.0138915
APOH	-0.0554184	-0.14721	-0.0917916	0.151509
APOL1	0.0215832	-0.0198196	-0.0414028	0.35738
APOL2	-0.153187	-0.0544288	0.0987582	0.0317361
APOL3	0.0598356	0.0903623	0.0305267	0.486717
APOL5	0.142635	0.0993978	-0.0432375	0.387594
APOL6	0.0124079	0.0780152	0.0656073	0.023129
APOLD1	-0.108634	-0.00128824	0.107346	0.107635
APOM	-0.078749	-0.0677218	0.0110273	0.486717
APOO	0.167572	0.103259	-0.0643126	0.0493839
APOOL	-0.173524	-0.21439	-0.0408664	0.597587
APP	0.0291371	-0.0176167	-0.0467539	0.35738
APPBP2	-0.0593483	-0.0603093	-0.00096102	0.846049
APPL1	-0.156135	-0.122352	0.0337826	0.419239
APPL2	-0.105305	-0.133139	-0.0278345	0.486717
APRT	-0.252435	-0.184262	0.0681739	0.187225
APTX	0.0405689	0.0161996	-0.0243693	0.275614
AQP1	0.0881808	0.0236579	-0.064523	0.135637
AQP10	-0.104742	-0.161831	-0.0570891	0.387594
AQP11	0.0665009	-0.00316517	-0.069666	0.074136
AQP12B	-0.108789	-0.135095	-0.026306	0.933698
AQP2	0.0510179	-0.0591193	-0.110137	0.135637
AQP3	0.103869	0.0161149	-0.0877545	0.187225
AQP4	0.0880176	0.123837	0.0358194	0.522457
AQP5	0.184182	0.17605	-0.00813241	0.889705
AQP6	0.0779154	0.0388467	-0.0390686	0.522457
AQP7	-0.245141	-0.347941	-0.1028	0.559428
AQP8	0.00725402	0.038938	0.031684	0.228513
AQP9	-0.0828318	-0.0702409	0.0125909	0.677084
AQR	-1.5541	-1.7248	-0.170705	0.387594
AR	0.119814	0.111851	-0.00796264	0.802828
ARAF	0.124438	0.142504	0.0180656	0.802828
ARAP1	-0.168232	-0.160832	0.00740022	0.889705
ARAP2	-0.00547385	-0.0434231	-0.0379493	0.597587
ARAP3	-0.00860447	-0.00213042	0.00647405	0.933698
ARC	0.069024	0.121953	0.0529285	0.597587
ARCN1	-1.24869	-1.58367	-0.334987	0.0271516
AREG	0.0720183	0.0431429	-0.0288754	0.452302
AREL1	0.0320115	-0.0735676	-0.105579	0.0953972
ARF1	-0.275859	-0.230127	0.0457322	0.718231
ARF3	-0.240488	-0.200277	0.040211	0.35738
ARF4	-0.731612	-0.683569	0.0480433	1
ARF5	0.144752	0.204513	0.0597606	0.275614
ARF6	-0.255865	-0.178988	0.0768768	0.559428
ARFGAP1	0.00470292	0.0292292	0.0245263	0.889705
ARFGAP2	0.042391	0.127117	0.0847264	0.275614
ARFGAP3	0.0250204	-0.0171794	-0.0421998	0.301379
ARFGEF1	-0.00263593	-0.185646	-0.18301	0.00534906
ARFGEF2	-0.0316615	-0.0406809	-0.00901934	0.559428
ARFGEF3	0.0649061	0.023761	-0.0411451	0.301379
ARFIP1	-0.0422388	-0.0729527	-0.0307138	0.597587
ARFIP2	0.128141	0.0473515	-0.0807896	0.0567662
ARFRP1	-0.690892	-0.508225	0.182667	0.0493839
ARG1	0.2347	0.20913	-0.02557	0.522457
ARG2	0.069742	0.0430604	-0.0266817	0.387594
ARGFX	-0.0100757	0.092128	0.102204	0.0842448
ARGLU1	-0.551917	-0.681947	-0.130031	0.301379
ARHGAP1	0.118731	0.065682	-0.0530486	0.35738
ARHGAP10	0.00747141	0.0555196	0.0480481	0.0317361
ARHGAP11A	-0.310544	-0.358148	-0.0476032	0.121035
ARHGAP12	0.0533918	0.0805944	0.0272026	0.677084
ARHGAP15	-0.082166	-0.020396	0.06177	0.35738
ARHGAP17	0.0182108	-0.0355607	-0.0537715	0.151509
ARHGAP18	0.0793999	0.146194	0.0667945	0.0953972
ARHGAP19	-0.134389	-0.108176	0.0262131	0.121035
ARHGAP20	0.12718	0.0908503	-0.0363299	0.328645
ARHGAP21	-0.113765	-0.126924	-0.0131591	0.933698
ARHGAP22	0.0314023	0.0101928	-0.0212095	0.846049
ARHGAP23	-0.228814	-0.163279	0.0655355	0.301379
ARHGAP24	-0.0948466	-0.120712	-0.025865	0.35738
ARHGAP25	0.083305	0.0627894	-0.0205156	0.802828
ARHGAP26	0.0573276	0.000583132	-0.0567445	0.301379
ARHGAP27	-0.222464	-0.357223	-0.134759	0.228513
ARHGAP28	0.106159	0.160748	0.0545887	0.486717
ARHGAP29	-0.429992	-0.527765	-0.0977728	0.486717
ARHGAP30	-0.205659	-0.259488	-0.0538286	0.419239
ARHGAP31	-0.135904	-0.0870724	0.048832	0.275614
ARHGAP32	-0.0682583	-0.0842686	-0.0160103	0.559428
ARHGAP33	-0.00953255	-0.0537537	-0.0442212	1
ARHGAP35	0.0786418	0.057311	-0.0213307	0.301379
ARHGAP36	0.0569635	0.00896776	-0.0479958	0.597587
ARHGAP39	-0.0661823	-0.0278503	0.038332	0.522457
ARHGAP4	0.0898701	0.136433	0.0465629	0.522457
ARHGAP44	0.175963	0.0776703	-0.0982925	0.0196077
ARHGAP45	0.110589	0.0612611	-0.0493281	0.35738
ARHGAP5	-0.107098	-0.109977	-0.00287819	0.933698
ARHGAP6	0.0103895	-0.0819101	-0.0922996	0.20715
ARHGAP8	0.0541037	-0.00288482	-0.0569885	0.107635
ARHGAP9	-0.280648	-0.151531	0.129117	0.107635
ARHGDIA	-0.0579371	-0.0113967	0.0465404	0.933698
ARHGDIB	0.0605917	0.093729	0.0331373	0.452302
ARHGDIG	-0.0684086	-0.0102072	0.0582013	0.301379
ARHGEF1	0.0209551	-0.0264215	-0.0473766	0.760193
ARHGEF10	0.0888971	0.0902319	0.00133478	0.889705
ARHGEF10L	0.09043	0.0934009	0.00297088	0.802828
ARHGEF11	-0.243404	-0.321054	-0.0776495	0.251322
ARHGEF12	-0.0106441	-0.0565184	-0.0458743	0.597587
ARHGEF15	0.113374	0.0732135	-0.0401606	0.187225
ARHGEF16	-0.120593	-0.0888503	0.0317424	0.846049
ARHGEF17	0.156245	0.242901	0.0866567	0.121035
ARHGEF18	0.0332914	-0.0233368	-0.0566281	0.760193
ARHGEF19	0.0145186	0.0384756	0.0239569	0.522457
ARHGEF2	-0.12293	-0.214655	-0.0917251	0.0493839
ARHGEF25	-0.119888	-0.189667	-0.0697787	0.636828
ARHGEF26	0.0718024	0.0168501	-0.0549523	0.419239
ARHGEF28	-0.108577	-0.0854722	0.0231044	0.636828
ARHGEF3	-0.032723	-0.0772626	-0.0445395	0.135637
ARHGEF33	-0.214772	-0.265	-0.0502275	0.846049
ARHGEF35	0.0192732	0.00773211	-0.0115411	0.713544
ARHGEF37	0.140057	0.166369	0.0263119	0.452302
ARHGEF38	-0.0753923	-0.0926205	-0.0172282	0.977872
ARHGEF39	-0.0459449	-0.0285149	0.0174299	1
ARHGEF4	0.0685052	0.0410864	-0.0274188	0.597587
ARHGEF40	-0.0964985	-0.0684398	0.0280588	0.846049
ARHGEF5	-0.297718	-0.304356	-0.00663876	0.889705
ARHGEF6	0.296176	0.330585	0.0344087	0.151509
ARHGEF7	-0.362374	-0.379424	-0.0170496	0.718231
ARHGEF9	0.0104336	0.0274242	0.0169906	0.933698
ARID1A	-0.0981752	-0.198464	-0.100289	0.718231
ARID1B	-0.33857	-0.213446	0.125124	0.228513
ARID2	-0.576997	-0.424741	0.152256	0.135637
ARID3A	-0.104382	-0.0856028	0.0187788	0.718231
ARID3B	-0.154683	-0.129019	0.0256631	0.559428
ARID3C	-0.0188824	-0.012556	0.00632636	0.419239
ARID4A	-0.127061	0.00586551	0.132926	0.00433975
ARID4B	-0.211564	-0.240413	-0.0288495	0.677084
ARID5A	-0.250333	-0.188132	0.0622007	0.20715
ARID5B	-0.115935	-0.114381	0.00155408	0.559428
ARIH1	-1.37602	-1.4315	-0.0554802	0.889705
ARIH2	-0.0543923	-0.0272582	0.027134	0.977872
ARL1	-0.24391	-0.213652	0.030258	0.559428
ARL10	-0.281862	-0.180257	0.101605	0.677084
ARL11	-0.0646323	-0.0601257	0.00450655	0.718231
ARL13A	0.106492	0.0592729	-0.0472189	0.20715
ARL13B	-0.144609	-0.0279044	0.116705	0.0196077
ARL14	0.104744	0.128986	0.0242418	0.889705
ARL14EP	-0.0118903	0.0637385	0.0756288	0.0953972
ARL14EPL	0.016279	-0.0223894	-0.0386684	0.559428
ARL15	-0.00584348	-0.0146571	-0.00881362	0.559428
ARL16	-0.147581	-0.160992	-0.0134108	1
ARL2	-1.48982	-1.3986	0.0912242	0.977872
ARL2BP	-0.179977	-0.101748	0.0782286	0.228513
ARL3	-0.0629655	-0.0866413	-0.0236758	0.802828
ARL4A	-0.0999513	-0.0349159	0.0650353	0.677084
ARL4C	-0.03456	-0.0222606	0.0122995	0.977872
ARL4D	-0.232777	-0.202245	0.0305328	0.977872
ARL5A	0.0628973	0.0443201	-0.0185772	0.597587
ARL5B	0.0240226	0.00660205	-0.0174206	0.802828
ARL5C	-0.126099	-0.190063	-0.0639639	0.387594
ARL6	0.131612	0.0855455	-0.0460666	0.559428
ARL6IP1	-0.0789964	-0.099297	-0.0203006	0.718231
ARL6IP4	-0.0464239	0.102412	0.148836	0.380952
ARL6IP5	0.00570884	0.00814288	0.00243405	0.760193
ARL6IP6	-0.255626	-0.152152	0.103474	0.0427954
ARL8A	-0.0885427	-0.0764249	0.0121178	0.933698
ARL8B	-0.173107	-0.161549	0.0115583	0.522457
ARL9	-0.0442081	0.0173661	0.0615742	0.275614
ARMC1	-0.0106574	-0.0988312	-0.0881738	0.151509
ARMC10	-0.405564	-0.296995	0.108569	0.0116066
ARMC12	-0.0274387	0.0195656	0.0470043	0.636828
ARMC2	0.0361285	0.0494895	0.013361	0.846049
ARMC3	0.0650578	0.119483	0.054425	0.228513
ARMC5	-0.400709	-0.248885	0.151824	0.168683
ARMC6	-0.40482	-0.322265	0.0825552	0.559428
ARMC7	-1.35955	-0.977029	0.382523	0.328645
ARMC8	0.0500605	-0.0357676	-0.0858281	0.0493839
ARMC9	-0.0088911	-0.0114376	-0.00254653	0.636828
ARMCX1	0.0465596	0.0325282	-0.0140314	0.760193
ARMCX2	0.0251799	0.00854431	-0.0166356	0.760193
ARMCX3	0.00374203	-0.00759849	-0.0113405	0.802828
ARMCX4	0.239599	0.231967	-0.00763142	0.677084
ARMCX5	0.10014	0.0926705	-0.00746936	0.718231
ARMCX6	-0.33251	-0.196169	0.136341	0.251322
ARMH1	-0.288796	-0.347059	-0.0582636	0.559428
ARMH2	0.184335	0.138084	-0.0462511	0.452302
ARMH3	-0.0377684	0.113388	0.151157	0.387594
ARMH4	-0.0506696	-0.0148136	0.035856	0.559428
ARMS2	0.0895846	0.0962655	0.00668086	0.802828
ARMT1	-0.0861217	0.00292925	0.089051	0.00654731
ARNT	-0.142609	-0.00722144	0.135388	0.0842448
ARNT2	-0.0303795	0.0404745	0.070854	0.0567662
ARPC1A	-0.0937409	-0.127265	-0.0335244	0.301379
ARPC1B	0.0158322	-0.00467599	-0.0205082	0.677084
ARPC2	-0.357526	-0.499483	-0.141957	0.151509
ARPC3	-0.853783	-0.684279	0.169504	0.151509
ARPC4	-0.691146	-0.649671	0.0414753	0.718231
ARPC5	-0.120934	-0.218978	-0.0980438	0.20715
ARPC5L	0.108645	0.078825	-0.0298202	0.35738
ARPIN	0.0898925	0.108832	0.0189397	0.387594
ARPP19	-0.357701	-0.400732	-0.0430308	0.559428
ARPP21	0.113612	0.107248	-0.00636406	0.889705
ARR3	-0.00927231	0.0280339	0.0373062	0.275614
ARRB1	0.0924383	0.0898501	-0.00258821	0.933698
ARRB2	0.0101756	-0.0213404	-0.031516	0.559428
ARRDC1	-0.0402086	0.0032498	0.0434584	0.35738
ARRDC2	-0.0887483	-0.0951732	-0.00642485	0.933698
ARRDC3	0.127823	0.0841693	-0.0436535	0.187225
ARRDC4	0.0251853	0.0586894	0.0335041	0.486717
ARRDC5	0.0366601	-0.00172356	-0.0383837	0.977872
ARSA	-0.0445805	0.0917373	0.136318	0.301379
ARSB	-0.237087	-0.237667	-0.000579772	1
ARSD	0.296419	0.289672	-0.00674707	0.889705
ARSF	0.170853	0.19888	0.0280264	0.35738
ARSG	0.0977089	0.101735	0.00402571	0.977872
ARSH	0.0449325	0.00742211	-0.0375104	0.135637
ARSI	0.0444326	0.0763963	0.0319637	0.597587
ARSJ	-0.0921316	-0.0987766	-0.00664498	0.522457
ARSK	-0.0771826	-0.081228	-0.00404533	0.802828
ARSL	0.12587	0.115482	-0.0103881	0.522457
ART1	0.053306	0.00600986	-0.0472961	0.251322
ART3	-0.0726263	-0.0562782	0.0163481	0.718231
ART4	0.0528583	0.0838706	0.0310124	0.168683
ART5	0.0568043	0.0436847	-0.0131196	0.889705
ARTN	-0.256995	-0.273311	-0.0163158	0.486717
ARV1	-0.0617538	-0.0696014	-0.00784762	0.718231
ARVCF	0.181926	0.0865007	-0.0954254	0.074136
ARX	0.0321918	0.0389006	0.00670881	0.977872
AS3MT	0.0277842	-0.0222419	-0.0500261	0.074136
ASAH1	0.0731173	0.00962679	-0.0634905	0.251322
ASAH2	0.0724458	0.134542	0.0620966	0.187225
ASAP1	0.0665644	0.0593554	-0.00720898	0.977872
ASAP2	0.0678967	0.0349374	-0.0329593	0.933698
ASAP3	-0.0733667	-0.104054	-0.0306875	0.35738
ASB1	0.170797	0.144515	-0.0262813	0.718231
ASB10	0.0409615	0.084477	0.0435155	0.486717
ASB11	0.230729	0.215503	-0.0152262	0.846049
ASB12	-0.016938	0.0576996	0.0746376	0.0649925
ASB13	0.113604	0.149511	0.0359073	0.802828
ASB14	0.0738088	-0.0284387	-0.102247	0.00796975
ASB15	0.148956	0.103062	-0.0458938	0.486717
ASB16	-0.169105	-0.0911292	0.0779754	0.187225
ASB17	-0.126412	-0.19735	-0.0709388	0.0196077
ASB18	0.0780822	0.0658416	-0.0122406	0.760193
ASB2	0.213261	0.178884	-0.0343776	0.802828
ASB3	-0.0658882	-0.0946567	-0.0287685	0.35738
ASB4	0.11013	0.157932	0.0478025	0.0842448
ASB5	0.173064	0.0668969	-0.106167	0.121035
ASB6	-0.308439	-0.217127	0.091312	0.187225
ASB7	-0.0365604	-0.00555695	0.0310034	0.522457
ASB8	-0.0662199	-0.0594217	0.00679818	0.760193
ASB9	0.160288	0.164594	0.00430604	0.597587
ASCC1	-0.172294	-0.131046	0.0412481	0.522457
ASCC2	0.0489141	0.0629849	0.0140707	1
ASCC3	-0.357614	-0.391716	-0.0341019	0.889705
ASCL1	-0.0553598	-0.0369459	0.0184139	0.559428
ASCL2	-0.0688415	-0.0158671	0.0529744	0.301379
ASCL3	0.0852134	0.107984	0.0227707	0.846049
ASCL4	0.114353	0.123019	0.00866538	0.889705
ASCL5	-0.183035	-0.298052	-0.115017	0.135637
ASF1A	-0.072251	-0.259373	-0.187122	0.0271516
ASF1B	-0.274452	-0.152939	0.121513	0.0953972
ASGR1	0.0716238	0.128122	0.0564977	0.522457
ASGR2	0.332359	0.333181	0.000821745	0.802828
ASH1L	-0.333955	-0.402675	-0.0687197	0.228513
ASH2L	-0.401804	-0.386684	0.0151197	0.846049
ASIC1	-0.259016	-0.185046	0.0739698	0.187225
ASIC2	0.017375	0.051208	0.033833	0.559428
ASIC3	0.0440612	0.120713	0.0766521	0.0369275
ASIC4	0.0893978	0.156792	0.0673942	0.151509
ASIC5	0.105691	0.140476	0.0347851	0.522457
ASIP	0.017905	0.137856	0.119951	0.0271516
ASL	-0.111779	0.0028963	0.114676	0.0317361
ASNS	-0.42086	-0.166239	0.254621	0.0271516
ASNSD1	-0.0647233	-0.190615	-0.125891	0.121035
ASPA	0.065586	0.0738008	0.00821484	0.677084
ASPDH	0.0914281	0.0868056	-0.00462247	0.452302
ASPG	0.0737159	0.0946862	0.0209703	0.889705
ASPH	0.0296013	-0.0370598	-0.0666611	0.228513
ASPHD1	-0.0351143	0.0179125	0.0530268	0.151509
ASPHD2	0.0585423	-0.0564305	-0.114973	0.0567662
ASPM	-0.29165	-0.432474	-0.140824	0.559428
ASPRV1	-0.12473	-0.156963	-0.0322328	0.846049
ASPSCR1	-0.143333	-0.109027	0.0343053	0.522457
ASRGL1	-0.0521873	-0.125171	-0.0729838	0.0271516
ASS1	-0.250026	-0.141093	0.108933	0.0493839
ASTE1	-0.035883	-0.0308796	0.00500335	0.889705
ASTL	-0.147427	-0.162403	-0.0149765	0.802828
ASTN1	-0.017673	-0.0485268	-0.0308538	0.636828
ASTN2	0.0208843	0.0179308	-0.00295344	0.677084
ASXL1	-0.103892	-0.021402	0.0824902	0.636828
ASXL3	0.0205584	-0.0276871	-0.0482455	0.522457
ASZ1	-0.0171971	-0.0974293	-0.0802323	0.187225
ATAD1	-0.130974	-0.224124	-0.0931501	0.0567662
ATAD2	-0.159499	-0.169397	-0.00989735	0.597587
ATAD2B	-0.0427523	-0.0301014	0.0126509	0.677084
ATAD3A	0.0162406	-0.0935445	-0.109785	0.0842448
ATAD3B	0.269461	0.20254	-0.0669201	0.387594
ATAD3C	0.234916	0.0830387	-0.151877	0.0096428
ATAD5	-0.371573	-0.371615	-4.18626e-05	0.977872
ATAT1	-0.021799	-0.0300539	-0.00825489	0.933698
ATCAY	0.00392609	-0.00318552	-0.00711161	0.933698
ATE1	0.0419785	0.0704986	0.0285201	0.760193
ATF1	-0.118769	-0.067986	0.0507827	0.419239
ATF2	0.00586464	-0.0680809	-0.0739456	0.328645
ATF3	0.00192447	0.0189899	0.0170655	0.301379
ATF4	-0.707448	-0.584645	0.122802	0.486717
ATF5	-0.141236	-0.0774522	0.0637837	0.228513
ATF6	-0.0519832	-0.0861622	-0.034179	0.387594
ATF6B	-0.181529	-0.186474	-0.00494515	0.933698
ATF7	-0.282327	-0.252875	0.0294517	0.718231
ATF7IP	-0.155004	-0.0861835	0.0688201	0.597587
ATF7IP2	0.0310602	-0.0176766	-0.0487368	0.251322
ATG10	-0.0691002	0.044265	0.113365	0.00796975
ATG101	-0.143665	-0.102487	0.0411776	0.452302
ATG12	-0.160674	0.00157562	0.16225	0.0096428
ATG13	-0.0721577	-0.0148263	0.0573314	0.301379
ATG14	-0.127512	-0.106874	0.0206376	0.559428
ATG16L1	-0.0631802	0.017274	0.0804541	0.074136
ATG16L2	-0.11681	-0.120867	-0.00405646	0.846049
ATG2A	-0.114454	-0.187563	-0.0731099	0.151509
ATG2B	0.0542652	0.0653893	0.0111242	0.889705
ATG3	-0.150213	-0.110251	0.0399617	0.387594
ATG4A	0.0270783	0.0283002	0.00122194	0.846049
ATG4B	-0.00116836	0.120064	0.121232	0.0317361
ATG4C	-0.0949047	-0.117466	-0.022561	0.802828
ATG4D	-0.0167763	0.0786043	0.0953806	0.559428
ATG5	0.0367881	0.0981373	0.0613493	0.0649925
ATG7	0.00870011	0.00531083	-0.00338928	0.597587
ATG9A	-0.16027	-0.132313	0.027957	0.486717
ATIC	-0.241618	-0.104951	0.136667	0.151509
ATL1	-0.187074	-0.224025	-0.0369515	0.889705
ATL2	-0.57444	-0.757694	-0.183253	0.275614
ATL3	-0.0501156	-0.105119	-0.0550035	0.387594
ATM	-0.132255	-0.126704	0.00555033	0.718231
ATMIN	-0.140932	-0.0867543	0.0541779	0.486717
ATN1	-0.13518	-0.125707	0.00947372	0.452302
ATOH1	-0.0462152	-0.139912	-0.0936969	0.0116066
ATOH7	-0.020819	-0.0124762	0.00834284	0.889705
ATOH8	-0.137961	-0.165353	-0.0273919	0.889705
ATOSA	-0.0439549	-0.101318	-0.0573631	0.419239
ATOSB	-0.0717631	-0.0879111	-0.0161481	0.802828
ATOX1	0.0958548	0.0707124	-0.0251423	0.522457
ATP10A	-0.172898	-0.217574	-0.0446767	0.35738
ATP10B	0.0961916	0.108257	0.0120652	0.597587
ATP10D	-0.0696736	-0.0642549	0.00541867	0.677084
ATP11A	-0.0401045	-0.0167598	0.0233447	0.933698
ATP11B	-0.103766	-0.0983459	0.00542049	0.0953972
ATP11C	-0.0485948	0.035697	0.0842919	0.135637
ATP12A	-0.0919571	-0.0491746	0.0427825	0.559428
ATP13A1	-0.238707	-0.189887	0.0488198	0.275614
ATP13A2	0.0272581	0.00713278	-0.0201253	0.636828
ATP13A3	-0.0382526	-0.0476413	-0.00938877	0.677084
ATP13A4	0.075236	0.0318211	-0.0434149	0.168683
ATP13A5	0.106309	0.073629	-0.0326798	0.760193
ATP1A1	-1.01425	-1.08174	-0.0674952	0.889705
ATP1A2	-0.0562612	-0.0034155	0.0528457	0.251322
ATP1A3	-0.075012	-0.053013	0.0219991	0.802828
ATP1A4	-0.0642532	-0.0722417	-0.00798853	0.889705
ATP1B1	-0.221135	-0.148523	0.0726115	0.387594
ATP1B2	-0.0290256	-0.0457357	-0.0167101	0.559428
ATP1B3	-0.263437	-0.164188	0.099249	0.121035
ATP1B4	0.030777	-0.0447919	-0.0755689	0.0427954
ATP23	-0.461925	-0.445436	0.0164895	0.889705
ATP2A1	-0.0540546	-0.107768	-0.0537133	0.20715
ATP2A2	-1.76418	-1.66022	0.103961	0.275614
ATP2A3	-0.106399	-0.0986217	0.00777682	0.718231
ATP2B1	-0.135963	-0.157413	-0.0214506	0.933698
ATP2B2	-0.0501822	-0.0652527	-0.0150705	0.977872
ATP2B3	-0.0327663	0.0408057	0.0735719	0.486717
ATP2B4	-0.235444	-0.235474	-3.06088e-05	0.977872
ATP2C1	-0.0444208	-0.0540195	-0.00959869	0.559428
ATP2C2	-0.0472911	-0.0751998	-0.0279088	0.718231
ATP4A	0.0574196	-0.0481865	-0.105606	0.187225
ATP4B	0.0417874	0.129787	0.0879994	0.228513
ATP5F1A	-0.687146	-0.610005	0.077141	0.522457
ATP5F1B	-0.878522	-0.852589	0.0259337	0.977872
ATP5F1C	-0.510701	-0.421422	0.0892797	0.419239
ATP5F1D	-0.677643	-0.618756	0.0588868	0.718231
ATP5F1E	-0.805284	-0.799324	0.00596008	0.973381
ATP5IF1	-0.179385	-0.105302	0.0740829	0.20715
ATP5MC1	-0.328539	-0.283575	0.0449633	0.419239
ATP5MC2	-0.303146	-0.205363	0.097783	0.0842448
ATP5MC3	0.0583298	-0.015816	-0.0741458	0.135637
ATP5ME	-0.38491	-0.349829	0.0350809	0.846049
ATP5MF	-1.18715	-1.09704	0.0901068	0.677084
ATP5MG	-0.417785	-0.421308	-0.00352247	0.677084
ATP5MGL	-0.290035	-0.247067	0.0429676	0.452302
ATP5MJ	-0.101116	-0.141226	-0.04011	0.522457
ATP5MK	-0.166329	-0.294261	-0.127931	0.0649925
ATP5PB	-0.728162	-0.67624	0.0519217	0.889705
ATP5PD	-0.499341	-0.501853	-0.00251149	0.802828
ATP5PF	-0.348126	-0.283374	0.064752	0.228513
ATP5PO	-0.4015	-0.476573	-0.075073	0.35738
ATP6AP1	-0.92115	-1.28693	-0.365783	0.0649925
ATP6AP2	-0.789334	-0.662907	0.126427	0.419239
ATP6V0A1	-0.235281	-0.247328	-0.012047	0.977872
ATP6V0A2	-0.0989216	-0.114401	-0.0154795	0.387594
ATP6V0A4	-0.101245	-0.0551069	0.0461378	0.559428
ATP6V0B	-1.08926	-1.1739	-0.0846387	0.486717
ATP6V0C	-2.41553	-2.03973	0.375804	0.251322
ATP6V0D1	-1.34867	-1.20441	0.144251	0.0271516
ATP6V0D2	-0.0573806	-0.144031	-0.0866505	0.452302
ATP6V0E1	-0.0601891	0.0360161	0.0962053	0.387594
ATP6V0E2	-0.0888202	-0.136967	-0.048147	0.419239
ATP6V1A	-2.0647	-1.82493	0.23977	0.20715
ATP6V1B1	-0.148967	-0.0793577	0.0696096	0.228513
ATP6V1B2	-1.9392	-1.65026	0.288941	0.135637
ATP6V1C1	-1.01158	-0.913637	0.097942	0.522457
ATP6V1C2	-0.0111478	0.0318913	0.043039	0.328645
ATP6V1D	-0.725667	-0.778655	-0.0529872	0.760193
ATP6V1E1	-1.31306	-1.14574	0.167326	0.0953972
ATP6V1E2	0.0487659	0.104676	0.0559097	0.20715
ATP6V1F	-1.25523	-1.04686	0.208368	0.452302
ATP6V1G1	-0.858477	-0.663649	0.194827	0.151509
ATP6V1G2	-0.00939924	0.0207775	0.0301767	0.559428
ATP6V1G3	0.024273	0.0369121	0.0126391	0.636828
ATP6V1H	-0.813656	-0.754322	0.0593347	0.718231
ATP7A	-0.11492	-0.138664	-0.0237444	1
ATP7B	0.096495	-0.0388674	-0.135362	0.0022291
ATP8A1	0.064737	0.0560034	-0.00873365	0.636828
ATP8A2	-0.17331	-0.200371	-0.0270611	0.636828
ATP8B1	0.107032	0.103842	-0.00318937	0.760193
ATP8B2	-0.231684	-0.120736	0.110948	0.0493839
ATP8B3	-0.0787968	-0.0373632	0.0414336	0.559428
ATP8B4	0.0913448	0.0648424	-0.0265024	0.636828
ATP9A	-0.0707012	-0.0521926	0.0185085	0.522457
ATP9B	-0.0177956	-0.0379049	-0.0201093	0.559428
ATPAF1	-0.050431	-0.0603393	-0.00990827	0.802828
ATPAF2	-0.0922225	-0.104079	-0.0118563	0.275614
ATPSCKMT	0.0749272	0.0742474	-0.000679778	0.486717
ATR	-1.45118	-1.05793	0.393254	0.0165474
ATRAID	-0.0495676	-0.0246941	0.0248736	0.636828
ATRIP	-0.635031	-0.576201	0.0588305	0.802828
ATRN	-0.114924	-0.148514	-0.0335896	0.802828
ATRNL1	0.188421	0.13467	-0.0537516	0.0953972
ATRX	-0.259772	-0.198029	0.061743	0.522457
ATXN1	0.0280876	0.0444719	0.0163844	0.677084
ATXN10	-0.520716	-0.412206	0.10851	0.135637
ATXN1L	-0.158331	-0.151892	0.00643854	0.636828
ATXN2	-0.254226	-0.262866	-0.00864061	0.718231
ATXN2L	-0.163318	-0.092097	0.0712211	0.251322
ATXN3	-0.0116997	0.0155909	0.0272906	0.559428
ATXN3L	0.311716	0.24209	-0.0696265	0.0369275
ATXN7	0.034171	-0.02168	-0.0558509	0.151509
ATXN7L1	0.0101558	0.141346	0.13119	0.00280278
ATXN7L2	-0.0804811	-0.194109	-0.113628	0.151509
ATXN7L3	-0.182664	-0.134537	0.0481263	0.522457
ATXN7L3B	-0.192566	-0.0436473	0.148919	0.000259426
AUH	-0.0733841	-0.00170027	0.0716839	0.0649925
AUNIP	-9.72759e-05	0.011173	0.0112702	0.889705
AUP1	-0.196912	-0.212916	-0.0160034	0.486717
AURKA	-1.19996	-1.0328	0.167157	0.20715
AURKAIP1	-0.464107	-0.355657	0.10845	0.328645
AURKB	-2.21809	-2.3286	-0.110517	0.328645
AURKC	0.0829587	-0.02856	-0.111519	0.023129
AUTS2	0.00485733	0.062619	0.0577617	0.328645
AVEN	-0.184026	-0.0418004	0.142226	0.00796975
AVIL	-0.155811	-0.0876179	0.0681931	0.187225
AVL9	0.0337594	0.0259831	-0.00777631	0.452302
AVP	-0.0561016	-0.0279802	0.0281215	0.452302
AVPI1	0.0286275	0.0667382	0.0381107	0.636828
AVPR1A	-0.170076	-0.335401	-0.165325	0.107635
AVPR1B	-0.033557	0.0687444	0.102301	0.0649925
AVPR2	0.0746224	0.0468809	-0.0277415	0.889705
AWAT1	0.0075622	0.0170592	0.00949696	0.933698
AWAT2	0.0762942	0.108384	0.0320902	0.846049
AXDND1	-0.21626	-0.104606	0.111654	0.0649925
AXIN1	0.0489415	0.0320453	-0.0168962	0.846049
AXIN2	0.00126865	-0.0402974	-0.0415661	0.251322
AXL	0.0939367	0.0548762	-0.0390605	0.419239
AZGP1	-0.103455	-0.182264	-0.0788096	0.486717
AZI2	-0.0985131	-0.136121	-0.0376079	0.486717
AZIN1	-0.190879	-0.128087	0.0627919	0.151509
AZIN2	-0.00482463	0.0649384	0.069763	0.187225
AZU1	0.1881	0.143304	-0.0447955	0.301379
B2M	0.0756366	0.110065	0.0344289	0.35738
B3GALNT1	-0.0871272	-0.0945283	-0.0074011	0.889705
B3GALNT2	0.0616476	-0.0379357	-0.0995833	0.0842448
B3GALT1	0.0405043	0.0330846	-0.00741971	0.802828
B3GALT2	-0.00662312	-0.00529221	0.00133091	1
B3GALT4	-0.0735659	-0.0299544	0.0436115	0.328645
B3GALT5	0.206643	0.232582	0.0259393	0.677084
B3GALT6	0.147426	0.157983	0.0105566	0.522457
B3GAT1	0.0688806	0.0522461	-0.0166345	0.846049
B3GAT2	-0.189887	-0.251374	-0.0614869	0.559428
B3GAT3	-0.19526	-0.205392	-0.0101329	0.636828
B3GLCT	-0.11022	-0.167597	-0.0573771	0.168683
B3GNT2	-0.160305	-0.205184	-0.0448787	0.419239
B3GNT3	-0.142816	-0.0187142	0.124102	0.074136
B3GNT4	-0.188194	-0.145002	0.0431923	0.597587
B3GNT5	-0.0231243	-0.0211737	0.00195053	0.977872
B3GNT6	-0.154833	-0.088756	0.0660775	0.328645
B3GNT7	-0.0604144	-0.0208124	0.039602	0.677084
B3GNT8	0.0562255	0.120086	0.0638607	0.168683
B3GNT9	-0.124268	-0.0494634	0.0748045	0.151509
B3GNTL1	0.00881603	0.00564454	-0.0031715	0.933698
B4GALNT1	-0.140778	-0.0949376	0.0458401	0.559428
B4GALNT2	-0.150306	-0.040276	0.11003	0.0567662
B4GALNT3	-0.0778522	-0.0915315	-0.0136793	0.760193
B4GALNT4	-0.0506839	0.0180295	0.0687135	0.419239
B4GALT1	0.0446911	-0.00617222	-0.0508633	0.35738
B4GALT2	-0.145966	-0.0912847	0.0546817	0.251322
B4GALT3	-0.265237	-0.239536	0.0257011	0.760193
B4GALT4	0.00805363	0.00381345	-0.00424018	0.802828
B4GALT5	-0.0201068	-0.0897905	-0.0696838	0.168683
B4GALT6	0.136118	0.201721	0.0656033	0.452302
B4GALT7	0.0114413	-0.0627449	-0.0741862	0.275614
B4GAT1	-0.214009	-0.174293	0.0397159	0.251322
B9D1	0.0108579	0.0179983	0.00714032	0.718231
B9D2	-0.0132231	-0.073895	-0.0606719	0.0649925
BAALC	-0.0235859	0.0623392	0.0859251	0.0953972
BAAT	0.103012	0.0905901	-0.0124223	0.760193
BABAM1	0.111474	0.0686961	-0.0427781	0.889705
BABAM2	0.0187324	0.028324	0.00959156	0.760193
BACE1	-0.111792	-0.0252664	0.0865258	0.0953972
BACE2	0.0725742	0.142881	0.0703067	0.452302
BACH1	0.0450864	0.0848402	0.0397538	0.387594
BACH2	0.0107987	-0.0118881	-0.0226868	0.559428
BAD	-0.152209	-0.118553	0.0336553	0.760193
BAG1	-0.012127	0.0340467	0.0461738	0.452302
BAG2	-0.104006	0.0153485	0.119355	0.0317361
BAG3	-0.0236288	-0.0379312	-0.0143024	0.559428
BAG4	-0.187654	-0.302985	-0.115331	0.121035
BAG5	-0.211334	-0.168598	0.0427361	0.486717
BAG6	-0.157448	-0.153152	0.00429607	0.486717
BAHD1	-0.209045	-0.161471	0.0475732	0.597587
BAIAP2	-0.0756376	-0.119	-0.0433626	0.228513
BAIAP2L1	0.0362918	-0.0541798	-0.0904717	0.107635
BAIAP2L2	-0.0429597	0.0203724	0.0633321	0.228513
BAIAP3	-0.0555002	0.00192493	0.0574252	0.121035
BAK1	-0.390753	-0.39464	-0.00388701	0.677084
BAMBI	-0.0576593	-0.0917112	-0.0340518	0.677084
BANF1	-2.19947	-2.01108	0.188388	0.074136
BANF2	0.109325	0.127197	0.0178727	0.522457
BANK1	-0.0395394	-0.0850485	-0.0455091	0.251322
BANP	-0.984103	-0.809591	0.174512	0.559428
BAP1	-0.551302	-0.607656	-0.0563548	0.251322
BARD1	-0.786633	-0.726885	0.0597482	0.802828
BARHL1	-0.0677458	-0.103251	-0.0355047	0.328645
BARHL2	-0.251677	-0.292241	-0.0405633	0.20715
BARX1	-0.000230938	-0.0387441	-0.0385131	0.228513
BARX2	0.0832521	0.0371012	-0.0461509	0.452302
BASP1	0.172018	0.172637	0.000619111	0.718231
BATF	-0.00110723	0.0701632	0.0712704	0.168683
BATF2	-0.00316903	0.00118919	0.00435822	0.889705
BATF3	0.0358176	0.0947988	0.0589812	0.023129
BAX	0.035097	0.115567	0.0804698	0.275614
BAZ1A	0.0430213	0.0638714	0.0208501	0.677084
BAZ1B	-0.356686	-0.345977	0.0107092	0.718231
BAZ2A	-0.204172	-0.14872	0.0554514	0.151509
BAZ2B	-0.0330579	-0.0275733	0.00548458	0.889705
BBC3	-0.0714429	-0.0336238	0.0378191	0.151509
BBIP1	0.0810476	0.0315474	-0.0495003	0.187225
BBLN	-0.28075	-0.121827	0.158922	0.00106805
BBOF1	-0.0751743	-0.0782514	-0.0030771	0.846049
BBOX1	0.118882	0.120128	0.00124632	0.933698
BBS1	-0.0628776	-0.0669139	-0.00403631	0.846049
BBS10	-0.0988099	-0.116064	-0.0172543	0.35738
BBS12	0.0771067	-0.0016153	-0.078722	0.275614
BBS2	0.00207857	-0.0264133	-0.0284918	0.889705
BBS4	0.138421	0.162614	0.0241928	0.802828
BBS5	-0.074066	-0.100593	-0.026527	0.35738
BBS7	0.15166	0.121501	-0.0301597	0.718231
BBS9	-0.0806231	-0.00851351	0.0721096	0.135637
BBX	0.14219	0.146241	0.00405102	0.977872
BCAM	0.079913	0.0467621	-0.033151	0.522457
BCAN	-0.0279969	-0.0584223	-0.0304254	0.718231
BCAP29	-0.0839458	-0.104941	-0.0209955	0.251322
BCAP31	-0.249376	-0.121841	0.127535	0.151509
BCAR1	-0.109962	-0.220274	-0.110313	0.228513
BCAR3	-0.134557	-0.138547	-0.00398909	0.636828
BCAS1	0.0581675	0.0932876	0.0351201	0.301379
BCAS2	-1.39432	-1.38978	0.00453922	0.559428
BCAS3	-0.197254	-0.175817	0.0214373	0.889705
BCAS4	0.0697739	-0.00117128	-0.0709452	0.20715
BCAT1	-0.00744154	0.0248103	0.0322519	0.486717
BCAT2	0.0334858	0.0428443	0.0093585	0.760193
BCCIP	-0.549191	-0.524687	0.024504	0.977872
BCDIN3D	-0.35608	-0.22847	0.12761	0.0493839
BCHE	0.0337994	-0.0849187	-0.118718	0.0116066
BCKDHA	-0.0556588	-0.0599755	-0.00431675	0.846049
BCKDHB	-0.115914	-0.0586099	0.0573039	0.522457
BCKDK	0.0287822	0.046123	0.0173408	0.677084
BCL10	-0.128068	-0.192046	-0.0639783	0.452302
BCL11A	-0.0166097	-0.0153702	0.00123946	0.846049
BCL11B	0.211517	0.199181	-0.0123364	0.933698
BCL2	0.0444086	0.0411214	-0.00328724	0.718231
BCL2A1	0.0180686	-0.0300115	-0.0480801	0.419239
BCL2L1	-1.26122	-1.57133	-0.31011	0.35738
BCL2L10	-0.00742032	0.00523897	0.0126593	0.933698
BCL2L11	-0.0114857	-0.0610974	-0.0496117	0.486717
BCL2L12	-0.259246	-0.175332	0.0839141	0.168683
BCL2L13	-0.153191	-0.223158	-0.069967	0.107635
BCL2L14	0.0330473	0.0647922	0.0317449	0.677084
BCL2L15	-0.0912563	-0.115975	-0.0247185	0.977872
BCL2L2	-0.0806802	-0.0632506	0.0174296	0.718231
BCL3	0.0692287	0.0901202	0.0208916	0.636828
BCL6	-0.051593	-0.0795493	-0.0279563	0.597587
BCL6B	0.0564104	0.0556293	-0.000781119	0.889705
BCL7A	-0.0250892	-0.0466904	-0.0216012	0.387594
BCL7B	0.0733747	0.0137332	-0.0596414	0.0953972
BCL7C	-0.0738015	-0.0755097	-0.00170814	0.802828
BCL9	-0.161686	-0.355144	-0.193458	0.0271516
BCL9L	0.0346459	0.00483888	-0.029807	0.636828
BCLAF1	-0.657774	-0.743436	-0.085662	0.452302
BCLAF3	0.0314239	-0.0883232	-0.119747	0.074136
BCO1	0.0375607	0.0629817	0.025421	0.760193
BCO2	-0.0194121	-0.000492558	0.0189195	0.760193
BCOR	-0.122396	-0.0906624	0.0317338	0.889705
BCORL1	-0.000312444	0.0147764	0.0150888	0.889705
BCR	0.0647389	-0.0275638	-0.0923027	0.0567662
BCS1L	-0.332525	-0.297353	0.0351727	0.597587
BDH1	0.064911	0.0364352	-0.0284758	0.486717
BDH2	-0.13249	0.0822288	0.214719	0.00350078
BDKRB1	0.104355	0.121384	0.0170288	0.636828
BDKRB2	0.090446	0.109255	0.0188093	0.802828
BDNF	-0.0039681	0.00648976	0.0104579	0.486717
BDP1	-1.06669	-0.92724	0.139448	0.486717
BEAN1	0.0136436	-0.113952	-0.127596	0.0493839
BECN1	-0.348878	-0.278927	0.0699503	0.35738
BEGAIN	0.0703627	0.0301384	-0.0402243	0.802828
BEND2	0.138282	0.130227	-0.00805485	0.889705
BEND3	-0.0545578	-0.0936604	-0.0391025	0.228513
BEND4	0.0938215	0.162213	0.0683913	0.0842448
BEND5	-0.0117688	0.0112565	0.0230253	0.419239
BEND6	-0.0243819	-0.100839	-0.0764573	0.0567662
BEND7	0.116478	0.153412	0.0369343	0.452302
BEST1	0.0060249	-0.0572029	-0.0632278	0.251322
BEST2	-0.0862897	-0.079958	0.00633165	0.977872
BEST3	-0.139393	-0.0557382	0.0836549	0.0271516
BEST4	-0.102656	-0.0826128	0.0200435	0.452302
BET1	-0.401274	-0.393375	0.00789862	0.636828
BET1L	-0.0414714	0.0580187	0.0994901	0.301379
BEX1	0.0019457	0.135781	0.133835	0.00175822
BEX2	0.0134612	-0.00165094	-0.0151121	0.559428
BEX3	0.16446	0.179047	0.0145872	0.889705
BEX4	-0.00347807	-0.0312528	-0.0277747	0.486717
BEX5	0.0444547	0.0449443	0.000489575	0.846049
BFAR	-0.00945218	-0.0584829	-0.0490308	0.107635
BFSP1	0.0857464	0.0889891	0.0032427	0.636828
BFSP2	0.138468	0.1817	0.043232	0.35738
BGLAP	-0.210421	-0.262735	-0.0523143	0.486717
BGN	0.123005	0.0965054	-0.0264999	0.718231
BHLHA15	-0.227122	-0.11988	0.107241	0.20715
BHLHA9	0.134203	0.131573	-0.00262986	0.889705
BHLHE22	-0.0540763	-0.132401	-0.0783251	0.107635
BHLHE23	-0.0334261	-0.0226001	0.010826	0.867555
BHLHE40	-0.0557706	-0.0343223	0.0214483	0.977872
BHLHE41	-0.0173484	-0.16603	-0.148682	0.074136
BHMT	-0.177068	-0.144862	0.0322067	0.452302
BHMT2	0.0628165	0.0822978	0.0194813	0.387594
BICC1	-0.0875714	-0.0705165	0.0170549	0.522457
BICD1	-0.142372	-0.160484	-0.0181119	0.597587
BICD2	-0.104763	-0.0524593	0.0523035	0.20715
BICDL1	-0.0798025	-0.0935517	-0.0137492	0.419239
BICDL2	-0.28848	-0.0882973	0.200182	0.00534906
BICRA	0.0502397	0.0823101	0.0320704	0.846049
BICRAL	-0.152366	-0.126307	0.0260594	0.301379
BID	-0.0300968	0.211376	0.241473	0.0842448
BIK	0.220084	0.231346	0.0112625	0.933698
BIN1	-0.0380807	-0.0444084	-0.00632767	0.559428
BIN2	-0.0687192	-0.0639816	0.00473757	0.802828
BIN3	0.167152	0.220635	0.0534821	0.419239
BIRC2	-0.202569	-0.168544	0.0340248	0.718231
BIRC3	0.026482	0.0586807	0.0321988	0.889705
BIRC5	-1.83675	-1.98233	-0.145582	0.486717
BIRC6	-0.296613	-0.463098	-0.166485	0.121035
BIRC7	0.219076	0.214953	-0.00412292	0.760193
BIVM	-0.0680164	-0.0357237	0.0322927	0.846049
BLCAP	0.105993	0.136648	0.0306546	0.452302
BLID	0.0963824	0.112687	0.0163045	0.846049
BLK	0.0788775	0.175637	0.0967591	0.0096428
BLM	-0.327592	-0.327965	-0.000372271	1
BLMH	-0.10048	-0.0472137	0.0532662	0.107635
BLNK	0.00212367	-0.0462377	-0.0483613	0.151509
BLOC1S1	0.0695133	0.0307981	-0.0387152	0.275614
BLOC1S2	0.0581459	0.0457114	-0.0124345	0.522457
BLOC1S3	0.0130905	0.0584879	0.0453974	0.486717
BLOC1S4	-0.0196272	0.0542425	0.0738697	0.20715
BLOC1S5	0.0527147	-0.0233529	-0.0760676	0.0842448
BLOC1S6	-0.0334942	-0.0688455	-0.0353513	0.20715
BLTP1	-0.0337037	-0.128384	-0.0946806	0.074136
BLTP2	-0.439908	-0.495977	-0.0560685	0.597587
BLTP3A	-0.184096	-0.248322	-0.0642258	0.187225
BLTP3B	0.00564842	-0.0230256	-0.028674	0.522457
BLVRA	0.0884745	0.1941	0.105625	0.00433975
BLVRB	-0.025589	-0.0380518	-0.0124628	0.760193
BLZF1	-0.0782354	-0.0519687	0.0262667	0.419239
BMAL1	-0.149205	-0.216885	-0.0676808	0.251322
BMAL2	-0.0892352	-0.102401	-0.0131655	0.522457
BMERB1	0.00589803	0.0420529	0.0361549	0.718231
BMF	-0.320407	-0.230045	0.0903615	0.228513
BMI1	0.149618	0.0842458	-0.0653722	0.187225
BMP1	0.1279	0.0246769	-0.103224	0.0649925
BMP10	-0.049626	-0.158317	-0.108691	0.0427954
BMP15	0.130278	0.158106	0.0278275	0.419239
BMP2	-0.000713674	-0.0326472	-0.0319335	0.889705
BMP2K	-0.0839041	-0.12701	-0.0431062	0.275614
BMP3	0.0614312	0.0380987	-0.0233324	0.486717
BMP4	0.0381926	0.0760208	0.0378281	0.387594
BMP5	0.0382909	-0.00334292	-0.0416338	0.677084
BMP6	-0.0493196	-0.0534473	-0.00412765	0.933698
BMP7	0.0535473	0.110263	0.0567158	0.35738
BMP8A	-0.0411446	-0.031976	0.00916859	0.867555
BMP8B	-0.136074	-0.13525	0.000824232	0.973381
BMPER	0.0410959	0.0365409	-0.00455502	0.802828
BMPR1A	-0.243767	-0.233101	0.0106661	0.597587
BMPR1B	-0.0932769	-0.0204679	0.0728089	0.168683
BMPR2	-0.147281	-0.0768848	0.0703962	0.107635
BMS1	-1.07561	-1.01558	0.0600342	0.559428
BMT2	0.0670654	0.0687989	0.00173352	0.718231
BMX	0.18571	0.215004	0.0292939	0.452302
BNC1	-0.020226	-0.00182876	0.0183972	0.760193
BNC2	0.0226067	0.00439478	-0.018212	0.933698
BNIP1	-0.598034	-0.62242	-0.0243862	0.889705
BNIP2	-0.2536	-0.456907	-0.203306	0.571429
BNIP3	-0.267681	-0.346329	-0.0786479	0.187225
BNIP3L	0.178581	0.138885	-0.0396969	0.275614
BNIP5	-0.0515545	-0.0345933	0.0169612	0.718231
BNIPL	-0.185414	-0.191574	-0.00615986	0.933698
BOC	0.00371207	-0.010536	-0.0142481	0.802828
BOD1	-0.110274	-0.0625065	0.0477676	0.802828
BOD1L1	-0.193066	-0.0617444	0.131322	0.187225
BOD1L2	0.0455734	0.021164	-0.0244094	0.419239
BOK	0.074937	0.0568558	-0.0180812	0.522457
BOLA1	-0.0938848	-0.0128011	0.0810838	0.0427954
BOLA3	-0.405782	-0.434271	-0.0284893	0.889705
BOLL	0.0530318	0.0579855	0.00495363	0.636828
BOP1	-1.39061	-0.962466	0.428141	0.0022291
BORA	-0.80651	-0.906188	-0.0996782	0.35738
BORCS5	-0.0912243	-0.184991	-0.0937668	0.0427954
BORCS6	-0.0302131	-0.028623	0.00159013	0.846049
BORCS7	-0.0438273	-0.0859091	-0.0420818	0.718231
BORCS8	-0.180782	-0.0604698	0.120312	0.0649925
BPGM	0.0549676	-0.0553036	-0.110271	0.0271516
BPHL	0.19437	0.220516	0.0261462	0.636828
BPI	0.041618	0.0683235	0.0267055	0.275614
BPIFA1	0.0677889	0.0320846	-0.0357043	0.452302
BPIFA2	0.110314	0.120899	0.0105841	0.486717
BPIFA3	-0.169823	-0.154572	0.0152504	0.168683
BPIFB1	-0.0564794	-0.0471533	0.00932609	0.677084
BPIFB2	-0.0161669	0.056971	0.073138	0.074136
BPIFB3	-0.0717379	0.0331377	0.104876	0.107635
BPIFB4	-0.121838	-0.0975176	0.0243203	0.718231
BPIFB6	-0.0202573	0.0397848	0.0600421	0.328645
BPIFC	-0.0601784	-0.0811038	-0.0209255	0.636828
BPNT1	-0.320634	-0.318331	0.00230304	0.846049
BPNT2	0.00741974	-0.0129543	-0.0203741	0.35738
BPTF	-0.62281	-0.766176	-0.143366	0.151509
BRAF	-0.0166809	-0.00900571	0.00767514	0.636828
BRAP	-0.320214	-0.27919	0.0410236	0.636828
BRAT1	-0.260526	-0.499062	-0.238536	0.0649925
BRCA1	-0.549453	-0.600228	-0.0507755	0.35738
BRCA2	-0.628438	-0.537524	0.0909139	0.522457
BRCC3	-0.0317478	-0.0569323	-0.0251845	0.718231
BRD1	-0.0450334	-0.0786531	-0.0336197	0.522457
BRD2	-0.788554	-0.25227	0.536284	0.00654731
BRD3	0.171006	0.0925446	-0.0784619	0.35738
BRD4	-0.89998	-1.01335	-0.113366	0.486717
BRD7	-0.379927	-0.348214	0.0317133	0.636828
BRD8	-0.40486	-0.458528	-0.0536678	0.452302
BRD9	0.00123588	0.0546542	0.0534183	0.275614
BRDT	0.0658206	0.0206803	-0.0451402	0.597587
BRF1	-1.17047	-1.1323	0.0381641	0.760193
BRF2	-1.8158	-1.68786	0.127941	0.522457
BRI3	-0.276435	-0.344222	-0.0677865	0.328645
BRI3BP	-0.0743712	-0.0849086	-0.0105373	0.977872
BRICD5	0.0695769	0.056112	-0.0134648	0.522457
BRINP1	0.168492	0.13794	-0.0305516	0.977872
BRINP2	0.00417101	0.00738673	0.00321572	0.977872
BRINP3	0.11023	0.0511913	-0.0590383	0.135637
BRIP1	-0.364184	-0.315335	0.0488491	0.933698
BRIX1	-1.12446	-1.08815	0.0363073	0.933698
BRK1	-0.276579	-0.215649	0.0609301	0.486717
BRME1	0.0381673	0.0957138	0.0575465	0.121035
BRMS1	-0.374196	-0.31052	0.0636763	0.228513
BRMS1L	-0.0925966	-0.0920482	0.000548363	0.597587
BROX	0.146508	0.119827	-0.0266816	0.419239
BRPF1	-0.150959	-0.275241	-0.124283	0.107635
BRPF3	0.0922912	0.0919856	-0.000305655	0.977872
BRS3	0.0636482	0.0309323	-0.0327159	0.275614
BRSK1	0.0774192	0.106242	0.0288229	0.802828
BRSK2	0.0977371	0.128026	0.0302889	0.559428
BRWD1	-0.167399	-0.230949	-0.0635499	0.301379
BRWD3	-0.0474779	0.0404512	0.0879292	0.135637
BSCL2	-0.078473	-0.0295957	0.0488773	0.228513
BSDC1	-0.161038	-0.174438	-0.0133994	0.933698
BSG	-0.210133	-0.0252966	0.184836	0.0317361
BSN	-0.290193	-0.300608	-0.0104158	0.889705
BSND	-0.0972584	0.00995456	0.107213	0.107635
BSPH1	0.0927567	0.0302402	-0.0625166	0.452302
BSPRY	0.109345	0.107346	-0.00199894	0.846049
BST1	0.0180662	-0.0196325	-0.0376987	0.846049
BST2	0.0466181	-0.0129783	-0.0595965	0.35738
BSX	0.0137988	0.0639919	0.0501931	0.0567662
BTAF1	-0.504493	-0.692731	-0.188238	0.168683
BTBD1	-0.0495264	0.0796193	0.129146	0.0022291
BTBD10	-0.106852	-0.134583	-0.0277317	0.760193
BTBD16	-0.0123461	-0.0131805	-0.000834375	0.933698
BTBD17	-0.0703051	-0.0796058	-0.00930061	0.933698
BTBD18	0.043915	-0.0107134	-0.0546284	0.168683
BTBD2	0.150382	0.114149	-0.0362335	0.760193
BTBD3	-0.0988134	-0.144361	-0.0455475	0.522457
BTBD6	0.0313958	-0.0178947	-0.0492905	0.275614
BTBD7	-0.31152	-0.333748	-0.0222284	0.522457
BTBD8	-0.12026	-0.155337	-0.035077	0.636828
BTBD9	-0.231688	-0.255302	-0.0236139	0.760193
BTC	0.0426449	0.135375	0.0927301	0.0567662
BTD	0.11913	0.0727891	-0.0463407	0.151509
BTF3	-0.782692	-0.774019	0.00867282	1
BTF3L4	-0.588657	-0.508096	0.0805609	0.597587
BTG1	-0.0537429	-0.012448	0.0412949	0.20715
BTG2	0.11168	0.105341	-0.00633934	0.977872
BTG3	0.0275834	0.051449	0.0238655	0.760193
BTG4	0.189171	0.131542	-0.0576288	0.0649925
BTK	-0.00447867	0.0366861	0.0411648	0.677084
BTLA	0.0851233	0.0663361	-0.0187873	0.275614
BTN1A1	0.094281	-0.00210683	-0.0963879	0.0369275
BTN2A1	0.112276	0.0989188	-0.0133567	0.889705
BTN2A2	0.123477	0.057551	-0.0659264	0.023129
BTN3A1	0.0980943	0.0379298	-0.0601645	0.0649925
BTN3A2	0.176927	0.123178	-0.0537495	0.328645
BTN3A3	0.0985921	0.00741625	-0.0911759	0.0427954
BTNL3	0.134191	0.193553	0.059362	0.20715
BTNL8	-0.0108391	-0.0526624	-0.0418233	0.35738
BTNL9	0.11089	0.120634	0.00974464	0.977872
BTRC	-0.219062	-0.215959	0.00310279	0.889705
BUB1	-0.906966	-0.739004	0.167962	0.121035
BUB1B	-1.2111	-1.243	-0.031897	0.846049
BUB3	-2.11967	-1.82198	0.297688	0.559428
BUD13	-0.851501	-0.854942	-0.00344074	0.977872
BUD23	-1.44094	-1.57183	-0.130897	0.301379
BUD31	-2.09842	-2.20946	-0.111039	0.328645
BVES	0.0452404	0.01888	-0.0263604	0.301379
BYSL	-1.30973	-1.27281	0.0369198	0.636828
BZW1	-0.166722	-0.186742	-0.0200206	0.522457
BZW2	0.0797396	0.000456398	-0.0792832	0.0493839
C10orf105	0.0308327	0.042639	0.0118062	0.802828
C10orf120	0.100668	0.137714	0.037046	0.35738
C10orf53	0.104996	0.110654	0.00565888	0.933698
C10orf62	0.0691419	0.0466621	-0.0224798	0.301379
C10orf67	0.174689	0.16341	-0.0112792	0.802828
C10orf71	0.0919215	0.099154	0.00723248	0.933698
C10orf82	0.139137	0.134933	-0.00420342	0.452302
C10orf88	-0.0310449	-0.0034698	0.0275751	0.597587
C10orf90	0.0217951	0.00290615	-0.0188889	0.977872
C10orf95	-0.179665	-0.0741046	0.105561	0.571429
C11orf16	0.0643891	0.0346385	-0.0297506	0.677084
C11orf21	0.0172046	0.0187419	0.00153736	0.846049
C11orf24	0.0845625	0.0498562	-0.0347062	0.301379
C11orf42	0.0754907	0.0401807	-0.03531	0.419239
C11orf52	0.085544	0.0808902	-0.00465376	0.718231
C11orf54	0.0830191	0.0876689	0.00464979	0.889705
C11orf58	-0.0562074	0.0975635	0.153771	0.00534906
C11orf65	0.0017638	-0.00749776	-0.00926156	0.452302
C11orf68	-0.195921	-0.264215	-0.0682933	0.301379
C11orf71	0.0542509	-0.0465977	-0.100849	0.0953972
C11orf80	0.102956	0.1405	0.0375438	0.677084
C11orf86	-0.115551	-0.100691	0.01486	0.522457
C11orf87	0.115169	0.134431	0.0192617	0.718231
C11orf91	-0.122034	-0.123462	-0.001428	0.718231
C12orf29	-0.0295776	-0.0304962	-0.000918604	0.977872
C12orf4	0.0724344	0.0337858	-0.0386486	0.251322
C12orf40	-0.0383146	-0.0682903	-0.0299757	0.522457
C12orf42	-0.0477826	-0.040466	0.0073166	0.889705
C12orf43	-0.0950187	-0.0956245	-0.000605851	0.977872
C12orf50	-0.100703	-0.147487	-0.046784	0.677084
C12orf54	-0.0299089	-0.0704441	-0.0405353	0.228513
C12orf56	-0.254543	-0.197729	0.0568148	0.168683
C12orf57	-0.040394	0.0989488	0.139343	0.251322
C12orf60	0.159219	0.184987	0.0257685	0.677084
C12orf71	0.0804198	0.129899	0.0494796	0.718231
C12orf75	-0.0053731	-0.151868	-0.146495	0.00280278
C14orf119	-0.0978274	-0.0546579	0.0431695	0.275614
C14orf180	0.184892	0.150865	-0.0340265	0.387594
C14orf28	-0.120949	-0.00816051	0.112788	0.107635
C14orf39	0.179662	0.10453	-0.0751324	0.452302
C14orf93	0.00240781	-0.0813605	-0.0837683	0.168683
C15orf39	-0.00379296	-0.0197786	-0.0159856	0.760193
C15orf40	0.0373632	0.102482	0.0651188	0.0953972
C15orf48	0.0379591	0.0420629	0.00410383	0.846049
C15orf61	0.198339	0.128653	-0.069686	0.121035
C15orf62	-0.0711934	0.0409107	0.112104	0.0271516
C16orf46	-0.112256	-0.105649	0.00660624	1
C16orf54	-0.0564505	0.0262137	0.0826642	0.023129
C16orf74	0.0751028	0.0726359	-0.00246688	0.522457
C16orf78	0.102954	0.218964	0.11601	0.00534906
C16orf86	-0.282428	-0.193717	0.0887111	0.187225
C16orf87	-0.101127	-0.179905	-0.0787784	0.135637
C16orf89	-0.0581687	-0.123869	-0.0657003	0.107635
C16orf90	-0.172355	-0.237312	-0.0649565	0.452302
C16orf92	-0.236099	-0.205547	0.0305511	0.387594
C16orf95	-0.165665	-0.131877	0.0337888	0.419239
C16orf96	-0.113002	-0.13306	-0.0200583	0.802828
C17orf107	0.10392	0.214476	0.110556	0.00534906
C17orf49	-0.424591	-0.355817	0.0687744	0.107635
C17orf50	-0.275675	-0.20404	0.0716346	0.387594
C17orf58	-0.488318	-0.340617	0.1477	0.023129
C17orf67	-0.108428	0.00543763	0.113865	0.000850611
C17orf75	-0.352491	-0.303104	0.0493872	0.328645
C17orf78	0.0246573	0.01592	-0.00873731	0.933698
C17orf80	-0.0613973	-0.102177	-0.0407797	0.933698
C17orf97	0.00764755	0.0294638	0.0218163	0.760193
C17orf98	-0.298615	-0.319956	-0.0213408	0.760193
C17orf99	-0.0817429	-0.0613248	0.0204181	0.933698
C18orf21	-0.512446	-0.525726	-0.0132795	0.636828
C18orf25	-0.0433379	-0.0523621	-0.00902415	0.889705
C18orf32	-0.111698	-0.0547231	0.0569744	0.35738
C18orf54	0.0761257	0.0473141	-0.0288116	0.846049
C18orf63	0.0599184	-0.0347801	-0.0946985	0.074136
C19orf12	-0.0982274	-0.124778	-0.026551	0.559428
C19orf18	0.0154722	-0.0461418	-0.061614	0.486717
C19orf25	-0.128961	-0.217052	-0.088091	0.452302
C19orf33	0.072951	0.0646326	-0.00831848	0.559428
C19orf38	-0.18422	-0.0987565	0.0854633	0.251322
C19orf44	-0.212773	-0.198306	0.0144664	0.20715
C19orf47	-0.0817622	-0.123219	-0.041457	0.933698
C19orf53	-0.681112	-0.622835	0.0582777	0.718231
C19orf67	-0.154601	-0.126012	0.028589	0.452302
C19orf73	-0.101649	-0.0278232	0.0738256	0.121035
C19orf81	0.0706012	0.0570763	-0.0135249	0.419239
C19orf84	0.0482007	0.121315	0.0731142	0.35738
C1D	-0.397528	-0.532608	-0.13508	0.168683
C1GALT1	-0.0146307	0.0213628	0.0359936	0.168683
C1GALT1C1	0.112892	0.0676509	-0.045241	0.328645
C1orf100	-0.0767836	-0.147911	-0.071127	0.228513
C1orf105	0.0129706	0.0551157	0.042145	0.20715
C1orf109	-1.10193	-1.25075	-0.148817	0.522457
C1orf112	-0.0201776	-0.0368068	-0.0166292	0.677084
C1orf115	0.0391611	-0.0215957	-0.0607568	0.023129
C1orf116	-0.00236351	0.0777782	0.0801418	0.135637
C1orf122	-0.18837	-0.207925	-0.0195547	0.933698
C1orf127	-0.157933	-0.129711	0.0282221	0.522457
C1orf131	-0.844517	-0.712958	0.131559	0.107635
C1orf141	0.0650682	0.0867486	0.0216804	0.559428
C1orf146	-0.097071	-0.101344	-0.00427343	0.977872
C1orf159	-0.0428239	0.106724	0.149548	0.023129
C1orf162	-0.191045	-0.198473	-0.00742829	0.933698
C1orf174	0.0558105	-0.0266657	-0.0824762	0.074136
C1orf185	0.0582478	0.0108507	-0.0473971	0.135637
C1orf198	-0.0551191	-0.0406392	0.0144798	1
C1orf21	0.00809958	-0.0739023	-0.0820019	0.187225
C1orf210	0.0508553	0.0457907	-0.0050646	1
C1orf216	-0.133924	-0.136512	-0.00258792	0.977872
C1orf226	-0.112801	-0.0983155	0.0144856	0.718231
C1orf35	-0.0578632	-0.0829572	-0.025094	0.452302
C1orf43	-0.202668	-0.230036	-0.0273675	0.452302
C1orf50	-0.0411667	-0.104045	-0.062878	0.35738
C1orf52	-0.182474	-0.169991	0.0124832	0.718231
C1orf53	0.0338576	-0.000883046	-0.0347406	0.597587
C1orf54	-0.0619833	-0.0975447	-0.0355614	0.486717
C1orf56	-0.247408	-0.365346	-0.117939	0.0369275
C1orf68	0.101869	0.117315	0.0154468	0.677084
C1orf74	-0.130477	-0.0877959	0.0426808	0.301379
C1orf87	-0.0466556	0.0165099	0.0631654	0.419239
C1orf94	0.13066	0.0842899	-0.04637	0.0271516
C1QA	-0.0629258	-0.0316455	0.0312804	0.419239
C1QB	-0.0112333	0.0372647	0.048498	0.275614
C1QBP	-0.424317	-0.290041	0.134276	0.452302
C1QC	0.0784609	0.110012	0.0315507	0.228513
C1QL1	-0.0126786	-0.00699149	0.00568714	0.977872
C1QL2	0.00432929	0.00919793	0.00486863	0.889705
C1QL3	0.131979	0.155748	0.0237689	0.760193
C1QL4	-0.0420634	-0.057911	-0.0158477	0.677084
C1QTNF1	-0.0987247	-0.149335	-0.0506101	0.522457
C1QTNF12	0.0705112	0.0632582	-0.00725306	0.760193
C1QTNF2	0.0486957	0.0926688	0.0439731	0.228513
C1QTNF3	0.116456	0.225175	0.108719	0.00280278
C1QTNF4	-0.265837	-0.3166	-0.0507628	0.35738
C1QTNF5	-0.152393	-0.0189263	0.133466	0.0842448
C1QTNF6	0.016534	0.0123351	-0.00419891	0.889705
C1QTNF7	0.129993	0.0600244	-0.069969	0.0567662
C1QTNF8	-0.0286666	-0.119469	-0.090802	0.0369275
C1QTNF9	-0.226411	-0.181601	0.0448096	0.441136
C1QTNF9B	-0.229902	-0.200749	0.0291522	0.482172
C1RL	0.0803208	0.13629	0.0559693	0.074136
C1S	-0.135488	-0.215933	-0.0804446	0.597587
C2	-0.0376419	-0.112796	-0.0751545	0.0567662
C20orf141	0.129433	0.152408	0.0229753	0.486717
C20orf144	-0.0265738	0.0437408	0.0703146	0.121035
C20orf173	-0.0544408	-0.0503784	0.00406246	0.933698
C20orf202	-0.0447793	0.0578473	0.102627	0.0317361
C20orf27	-0.0132758	0.0102993	0.0235751	0.486717
C20orf85	-0.0254026	-0.100364	-0.0749614	0.275614
C20orf96	0.14089	0.189036	0.0481462	0.168683
C21orf140	0.124872	0.0998656	-0.0250063	0.35738
C21orf58	-0.0922129	-0.00273033	0.0894825	0.0369275
C21orf62	0.0346974	-0.0132097	-0.047907	0.074136
C21orf91	0.0674882	0.0614156	-0.00607258	0.933698
C22orf15	-0.104639	-0.104738	-9.93538e-05	0.802828
C22orf23	-0.113807	-0.116295	-0.00248819	0.889705
C22orf31	-0.00778996	-0.0585173	-0.0507273	0.251322
C22orf39	-0.101303	-0.252069	-0.150766	0.0116066
C22orf42	0.10668	0.0610567	-0.0456233	0.251322
C2CD2	-0.0881753	-0.00391974	0.0842555	0.0842448
C2CD2L	0.0672406	0.0517476	-0.015493	0.760193
C2CD3	-0.0492924	0.0346704	0.0839628	0.452302
C2CD4A	-0.148933	-0.0684831	0.0804502	0.074136
C2CD4B	0.0809054	0.0659662	-0.0149392	0.846049
C2CD4C	0.116527	0.233928	0.117402	0.135637
C2CD4D	-0.18084	-0.160719	0.0201208	0.452302
C2CD5	0.0539508	0.0401933	-0.0137575	0.933698
C2CD6	-0.0614984	-0.103859	-0.0423611	0.846049
C2orf15	-0.152124	-0.116774	0.0353504	0.486717
C2orf42	-0.214055	-0.160836	0.0532195	0.187225
C2orf49	-0.307427	-0.200302	0.107125	0.0493839
C2orf50	0.0183443	0.0786785	0.0603341	0.275614
C2orf66	0.0615294	0.0342023	-0.0273271	0.760193
C2orf68	-0.351098	-0.376709	-0.0256115	0.559428
C2orf69	-0.214248	-0.0710582	0.14319	0.074136
C2orf72	0.123251	0.0578999	-0.0653507	0.452302
C2orf73	0.0166491	0.0105697	-0.00607933	0.718231
C2orf76	-0.148484	-0.250149	-0.101664	0.328645
C2orf78	-0.230775	-0.184268	0.0465069	0.275614
C2orf80	0.0106755	0.0292036	0.0185281	0.977872
C2orf88	0.0363415	0.00169048	-0.034651	0.228513
C3	-0.0749274	-0.0471939	0.0277334	0.387594
C3AR1	0.0206371	0.00442196	-0.0162152	0.846049
C3orf14	0.126872	0.0529732	-0.0738984	0.121035
C3orf18	-0.043363	-0.0222312	0.0211318	0.760193
C3orf20	0.18577	0.147471	-0.0382997	0.20715
C3orf22	-0.0799912	0.00307577	0.0830669	0.0953972
C3orf33	0.127438	0.159547	0.0321098	0.718231
C3orf38	-0.260161	-0.331279	-0.071118	0.933698
C3orf52	0.0836072	0.123296	0.0396888	0.387594
C3orf62	-0.107293	-0.16961	-0.0623165	0.419239
C3orf70	-0.0302193	0.0588744	0.0890936	0.0427954
C3orf80	0.082143	0.0767237	-0.00541929	0.933698
C3orf84	-0.0621187	-0.0582603	0.00385837	0.636828
C4B	0.375455	0.172756	-0.202699	0.0952381
C4BPA	0.0503423	0.0864218	0.0360796	0.597587
C4BPB	-0.0708872	-0.0733205	-0.00243323	1
C4orf17	0.0551699	0.0554101	0.000240198	0.802828
C4orf19	0.0306531	0.0662472	0.0355941	0.387594
C4orf3	0.0607052	0.120052	0.059347	0.35738
C4orf33	0.0424382	0.0395627	-0.00287553	0.718231
C4orf36	0.0311032	0.0485182	0.017415	0.522457
C4orf45	0.0445333	0.0514641	0.00693075	1
C4orf46	-0.138396	0.0667769	0.205173	0.00175822
C4orf47	0.121069	0.104425	-0.0166432	0.889705
C4orf48	0.15265	0.0713291	-0.0813213	0.107635
C4orf51	0.00448359	-0.00484987	-0.00933346	0.889705
C5	-0.0215797	-0.0331296	-0.0115499	0.977872
C5AR1	0.062575	0.0553051	-0.00726987	0.977872
C5AR2	0.0689331	0.0926913	0.0237582	0.636828
C5orf15	-0.171679	-0.184572	-0.0128939	0.522457
C5orf22	0.0258807	-0.0175414	-0.0434221	0.559428
C5orf24	0.0527731	0.125218	0.0724453	0.328645
C5orf34	-0.0621574	0.0323819	0.0945393	0.0953972
C5orf46	0.16611	0.145116	-0.0209941	0.760193
C5orf47	0.0347276	0.113296	0.078568	0.074136
C5orf52	-0.0774002	-0.158593	-0.0811931	0.275614
C5orf58	0.081455	-0.183699	-0.265154	0.0952381
C5orf63	0.0165764	0.108867	0.0922907	0.275614
C6	-0.00407663	0.0439329	0.0480095	0.275614
C6orf118	0.151236	0.149093	-0.00214298	0.636828
C6orf120	0.151092	0.151546	0.000454457	0.889705
C6orf132	0.0463935	0.0493047	0.00291121	0.889705
C6orf136	-0.273332	-0.155184	0.118148	0.168683
C6orf141	-0.0677439	-0.0191518	0.0485921	0.151509
C6orf15	-0.089296	-0.0974838	-0.00818776	0.977872
C6orf163	-0.0262957	-0.035024	-0.00872827	1
C6orf226	-0.171203	-0.128474	0.0427287	0.301379
C6orf47	-0.0770069	-0.0997595	-0.0227526	0.419239
C6orf52	0.0158997	-0.00824156	-0.0241413	0.486717
C6orf58	0.0601418	0.0259441	-0.0341977	0.559428
C6orf62	0.136831	0.0532728	-0.0835583	0.0842448
C6orf89	-0.24069	-0.238495	0.00219472	0.559428
C7	-0.0144965	0.0198707	0.0343672	0.419239
C7orf25	0.0195253	-0.0233463	-0.0428717	0.328645
C7orf31	0.0500459	0.0600425	0.00999658	0.718231
C7orf33	0.0232112	0.0182879	-0.00492329	0.846049
C7orf50	-0.139059	-0.0527746	0.086284	0.452302
C7orf57	-0.0177706	-0.0164544	0.0013162	1
C8A	0.0782474	0.0625237	-0.0157237	0.597587
C8B	0.0835776	0.0609318	-0.0226458	0.486717
C8G	0.0108105	0.0090237	-0.00178679	0.977872
C8orf33	-0.222746	-0.0594675	0.163279	0.074136
C8orf34	-0.0136298	-0.0207931	-0.00716327	0.559428
C8orf48	0.1866	0.146186	-0.0404147	0.301379
C8orf58	-0.0311219	-0.0302455	0.000876357	0.419239
C8orf74	0.0642033	0.0905285	0.0263252	0.301379
C8orf76	-0.0286569	-0.0117698	0.0168871	0.802828
C8orf82	-0.0723589	-0.0179725	0.0543864	0.301379
C8orf88	-0.0581882	-0.0966824	-0.0384941	0.636828
C9	-0.074496	0.0194537	0.0939497	0.0427954
C9orf131	-0.0786808	-0.0300707	0.0486101	0.760193
C9orf152	0.111503	0.137943	0.0264392	0.889705
C9orf153	0.0800343	-0.0135948	-0.0936291	0.251322
C9orf24	-0.193368	-0.205283	-0.011915	0.636828
C9orf40	0.00688383	0.00420069	-0.00268313	0.933698
C9orf43	0.00933069	0.0293967	0.0200661	0.522457
C9orf50	-0.0551197	-0.0129852	0.0421345	0.301379
C9orf57	-0.176945	-0.258069	-0.0811245	0.380952
C9orf64	-0.0368431	-0.0432986	-0.0064555	0.889705
C9orf72	0.0304073	0.00237363	-0.0280337	0.718231
C9orf78	-0.488884	-0.33893	0.149954	0.486717
C9orf85	-0.109419	-0.12413	-0.0147105	0.933698
CA1	-0.0331636	-0.0590106	-0.025847	0.933698
CA10	-0.0654612	-0.107597	-0.0421357	0.419239
CA11	-0.119016	-0.0459128	0.0731032	0.228513
CA12	-0.00728749	-0.0726886	-0.0654011	0.301379
CA13	0.066819	0.0521018	-0.0147172	0.889705
CA14	0.00320348	-0.0304825	-0.033686	0.597587
CA2	0.0351648	0.0825284	0.0473636	0.168683
CA3	0.0385159	0.073304	0.0347881	0.452302
CA4	0.055344	0.120976	0.0656318	0.187225
CA5A	-0.504217	-0.428974	0.0752425	0.275614
CA5B	0.160128	0.0971745	-0.0629539	0.074136
CA6	-0.0169367	0.0212503	0.038187	0.677084
CA7	-0.0845471	-0.0898424	-0.00529521	0.802828
CA8	-0.0445292	-0.0765693	-0.0320401	0.522457
CA9	-0.104144	-0.103094	0.00104945	0.977872
CAAP1	0.048298	0.0607078	0.0124098	0.802828
CAB39	0.102427	-0.0919608	-0.194388	0.35738
CAB39L	0.0451034	0.0434257	-0.00167771	0.597587
CABCOCO1	-0.177646	-0.0898854	0.0877605	0.0842448
CABIN1	-0.128617	-0.118475	0.0101421	0.802828
CABLES1	-0.102636	0.00316248	0.105798	0.0022291
CABLES2	-0.0746264	-0.0136146	0.0610119	0.187225
CABP1	0.0287033	0.0132434	-0.0154599	0.452302
CABP2	-0.0970025	-0.0106354	0.0863671	0.0427954
CABP4	-0.0289509	0.00696806	0.035919	0.718231
CABP5	0.0708819	0.0262155	-0.0446664	0.187225
CABP7	-0.176608	-0.132811	0.0437967	0.889705
CABS1	0.137182	0.0704028	-0.066779	0.0493839
CABYR	-0.0246549	-0.020992	0.00366288	0.889705
CACFD1	0.0942241	0.0354813	-0.0587428	0.107635
CACHD1	0.0796005	0.0185743	-0.0610262	0.301379
CACNA1A	-0.127133	-0.0714331	0.0557	0.636828
CACNA1B	-0.0687053	-0.0716019	-0.00289661	0.933698
CACNA1C	0.0325821	0.0405789	0.00799682	0.933698
CACNA1D	-0.0536869	-0.0868823	-0.0331954	0.387594
CACNA1E	0.100645	0.146494	0.0458486	0.251322
CACNA1F	-0.0585177	-0.0215369	0.0369808	0.151509
CACNA1G	-0.188712	-0.196529	-0.00781701	0.760193
CACNA1H	-0.0217943	-0.0578076	-0.0360133	0.35738
CACNA1I	-0.00461634	0.0211468	0.0257631	0.977872
CACNA1S	-0.0467914	-0.0170807	0.0297107	0.677084
CACNA2D1	-0.189533	-0.251442	-0.0619097	0.228513
CACNA2D2	-0.153357	-0.151524	0.00183298	0.636828
CACNA2D3	-0.0107379	-0.0966957	-0.0859578	0.0138915
CACNA2D4	0.0426325	-0.0148803	-0.0575128	0.151509
CACNB1	-0.247778	-0.251695	-0.00391691	0.977872
CACNB2	0.0996171	0.0564905	-0.0431265	0.559428
CACNB3	-0.422776	-0.394257	0.0285195	0.802828
CACNB4	0.0488243	0.118978	0.0701539	0.0317361
CACNG1	-0.104436	-0.121858	-0.0174221	0.636828
CACNG2	-0.10465	-0.204113	-0.099463	0.387594
CACNG3	-0.0459903	-0.188767	-0.142777	0.0096428
CACNG4	-0.111853	-0.0386553	0.0731979	0.20715
CACNG5	-0.0202427	-0.0505441	-0.0303014	0.559428
CACNG6	-0.0716703	-0.157498	-0.0858274	0.0842448
CACNG7	0.261654	0.240223	-0.0214313	0.597587
CACNG8	0.298982	0.252118	-0.046864	0.35738
CACTIN	-1.14099	-1.14778	-0.00678255	0.597587
CACUL1	0.0267768	-0.00891104	-0.0356878	0.977872
CACYBP	-0.348814	-0.281463	0.0673513	0.187225
CAD	-0.435796	-0.268451	0.167345	0.35738
CADM1	0.00215131	0.0331276	0.0309763	0.760193
CADM2	0.0324897	0.0249497	-0.00753996	0.802828
CADM3	0.0344598	-0.00928893	-0.0437487	0.328645
CADM4	-0.305431	-0.385917	-0.0804863	0.228513
CADPS	-0.00170839	-0.0154261	-0.0137177	0.933698
CADPS2	0.127587	0.126008	-0.00157903	0.933698
CAGE1	0.0317481	0.07006	0.0383119	0.387594
[truncated: 15,933 more rows]
